# Supplementary material for: Functional Improvement after Photothrombotic Stroke in Rats Is Associated with Different Patterns of Dendritic Plasticity after G-CSF Treatment and G-CSF Treatment Combined with Concomitant or Sequential Constraint-Induced Movement Therapy
Source: PubMed Central journal article supplement (PMC4713830; doi:10.1371/journal.pone.0146679), 2016-01-11
Supplement: pone.0146679.s001.pdf [file pone.0146679.s001.pdf]

## Data Figure 2

Basilar dendrites peri-infarct cortex

| Group   | number    |         | Qty | Length (µm) | mean length (µm) |
|---------|-----------|---------|-----|-------------|------------------|
| Control | 215-9-1i  | basilar | 7   | 669,9       | 95,7             |
| Control | 215-11-1i | basilar | 7   | 789,1       | 112,7            |
| Control | 215-15-1i | basilar | 10  | 959,4       | 95,9             |
| Control | 215-16-1i | basilar | 6   | 1048        | 174,7            |
| Control | 215-18-1i | basilar | 6   | 866,4       | 144,4            |
| Control | 216-6-1i  | basilar | 6   | 1763,5      | 293,9            |
| Control | 216-8-1i  | basilar | 5   | 1154,9      | 231              |
| Control | 216-12-1i | basilar | 6   | 303,1       | 50,5             |
| Control | 216-18-1i | basilar | 6   | 402         | 67               |
| Control | 216-19-1i | basilar | 6   | 348,1       | 58               |
| Control | 216-22-1i | basilar | 4   | 615,2       | 153,8            |
| Control | 219-10-1i | basilar | 4   | 989         | 247,2            |
| Control | 219-14-1i | basilar | 6   | 1446,3      | 241              |
| Control | 219-15-1i | basilar | 6   | 1038,9      | 173,1            |
| Control | 219-17-1i | basilar | 5   | 986         | 197,2            |
| Control | 219-21-1i | basilar | 6   | 1628,3      | 271,4            |
| Control | 297-19-1i | basilar | 6   | 1084,7      | 180,8            |
| Control | 297-19-2i | basilar | 5   | 512,6       | 102,5            |
| Control | 297-20-1i | basilar | 9   | 1479,8      | 164,4            |
| Control | 297-22-1i | basilar | 6   | 657,5       | 109,6            |
| Control | 297-22-2i | basilar | 6   | 1138,8      | 189,8            |
| Control | 298-15-1i | basilar | 8   | 1141,8      | 142,7            |
| Control | 298-15-2i | basilar | 6   | 592,5       | 98,7             |
| Control | 298-16-1i | basilar | 3   | 288,1       | 96               |
| Control | 298-17-1i | basilar | 5   | 948         | 189,6            |
| Control | 298-18-1i | basilar | 5   | 924,4       | 184,9            |
| Control | 308-17-1i | basilar | 7   | 1291,7      | 184,5            |
| Control | 308-18-1i | basilar | 10  | 1277,8      | 127,8            |
| Control | 308-18-2i | basilar | 12  | 932         | 77,7             |
| Control | 308-21-1i | basilar | 7   | 603,3       | 86,2             |
| Control | 308-21-2i | basilar | 7   | 959,8       | 137,1            |
| CIMT    | 211-10-1i | basilar | 6   | 2019,4      | 336,6            |
| CIMT    | 211-13-1i | basilar | 7   | 1115,3      | 159,3            |
| CIMT    | 211-13-2i | basilar | 3   | 729         | 243              |
| CIMT    | 211-14-1i | basilar | 5   | 934,2       | 186,8            |
| CIMT    | 211-14-2i | basilar | 6   | 566,9       | 94,5             |
| CIMT    | 211-15-1i | basilar | 6   | 794,3       | 132,4            |
| CIMT    | 211-15-2i | basilar | 4   | 1000        | 250              |
| CIMT    | 212-13-1i | basilar | 4   | 542,4       | 135,6            |
| CIMT    | 212-13-2i | basilar | 4   | 621         | 155,3            |
| CIMT    | 212-14-1i | basilar | 6   | 538,6       | 89,8             |
| CIMT    | 212-14-2i | basilar | 8   | 967,3       | 120,9            |
| CIMT    | 212-15-1i | basilar | 3   | 491,1       | 163,7            |
| CIMT    | 218-11-1i | basilar | 5   | 738,5       | 147,7            |
| CIMT    | 218-14-1i | basilar | 7   | 831,8       | 118,8            |
| CIMT    | 218-16-1i | basilar | 5   | 1740,8      | 348,2            |
| CIMT    | 218-17-1i | basilar | 3   | 1068,2      | 356,1            |
| CIMT    | 218-19-1i | basilar | 3   | 1209,1      | 403              |
| CIMT    | 299-14-1i | basilar | 6   | 854,1       | 142,4            |
| CIMT    | 299-14-2i | basilar | 6   | 884,6       | 147,4            |

|            |           |         |    |        |       |
|------------|-----------|---------|----|--------|-------|
| CIMT       | 299-15-1i | basilar | 5  | 962,1  | 192,4 |
| CIMT       | 299-16-1i | basilar | 3  | 550,8  | 183,6 |
| CIMT       | 299-17-1i | basilar | 5  | 314,4  | 62,9  |
| CIMT       | 300-16-1i | basilar | 5  | 823,2  | 164,6 |
| CIMT       | 300-20-1i | basilar | 7  | 1169,8 | 167,1 |
| CIMT       | 300-22-1i | basilar | 4  | 1550   | 387,5 |
| CIMT       | 300-24-1i | basilar | 5  | 1030,3 | 206,1 |
| CIMT       | 300-24-2i | basilar | 5  | 1261,4 | 252,3 |
| CIMT       | 309-15-1i | basilar | 6  | 874,3  | 145,7 |
| CIMT       | 309-15-2i | basilar | 10 | 1016   | 101,6 |
| CIMT       | 309-16-1i | basilar | 5  | 653,3  | 130,7 |
| CIMT       | 309-16-2i | basilar | 10 | 2040,5 | 204,1 |
| CIMT       | 309-17-1i | basilar | 5  | 1333,6 | 266,7 |
| CIMT+G-CSF | 213-08-1i | basilar | 5  | 907,8  | 181,6 |
| CIMT+G-CSF | 213-12-1i | basilar | 6  | 386,5  | 64,4  |
| CIMT+G-CSF | 213-14-1i | basilar | 6  | 280,6  | 46,8  |
| CIMT+G-CSF | 213-17-1i | basilar | 7  | 1153,4 | 164,8 |
| CIMT+G-CSF | 213-18-1i | basilar | 8  | 845,6  | 105,7 |
| CIMT+G-CSF | 214-14-1i | basilar | 7  | 609,2  | 87    |
| CIMT+G-CSF | 214-14-2i | basilar | 7  | 590,6  | 84,4  |
| CIMT+G-CSF | 214-17-1i | basilar | 5  | 710,8  | 142,2 |
| CIMT+G-CSF | 214-18-1i | basilar | 6  | 927    | 154,5 |
| CIMT+G-CSF | 214-19-1i | basilar | 5  | 679,8  | 136   |
| CIMT+G-CSF | 217-6-1i  | basilar | 5  | 1211   | 242,2 |
| CIMT+G-CSF | 217-8-1i  | basilar | 4  | 1413,2 | 353,3 |
| CIMT+G-CSF | 217-10-1i | basilar | 5  | 544,5  | 108,9 |
| CIMT+G-CSF | 217-16-1i | basilar | 5  | 2581,7 | 516,3 |
| CIMT+G-CSF | 217-17-1i | basilar | 7  | 2179,9 | 311,4 |
| CIMT+G-CSF | 304-17-1i | basilar | 4  | 434,4  | 108,6 |
| CIMT+G-CSF | 304-19-1i | basilar | 4  | 438,2  | 109,6 |
| CIMT+G-CSF | 304-19-2i | basilar | 4  | 529,9  | 132,5 |
| CIMT+G-CSF | 304-20-1i | basilar | 5  | 558,1  | 111,6 |
| CIMT+G-CSF | 304-21-1i | basilar | 4  | 1378,9 | 344,7 |
| CIMT+G-CSF | 304-21-2i | basilar | 5  | 388,6  | 77,7  |
| CIMT+G-CSF | 304-22-1i | basilar | 6  | 644,4  | 107,4 |
| CIMT+G-CSF | 305-17-1i | basilar | 6  | 765,5  | 127,6 |
| CIMT+G-CSF | 305-17-2i | basilar | 4  | 850,7  | 212,7 |
| CIMT+G-CSF | 305-18-1i | basilar | 7  | 379,1  | 54,2  |
| CIMT+G-CSF | 305-19-1i | basilar | 5  | 710,7  | 142,1 |
| CIMT+G-CSF | 305-19-2i | basilar | 6  | 787,8  | 131,3 |
| CIMT/G-CSF | 306-17-1i | basilar | 6  | 542    | 90,3  |
| CIMT/G-CSF | 306-17-2i | basilar | 8  | 1246,1 | 155,8 |
| CIMT/G-CSF | 306-18-1i | basilar | 4  | 670,8  | 167,7 |
| CIMT/G-CSF | 306-18-2i | basilar | 6  | 910,5  | 151,8 |
| CIMT/G-CSF | 306-18-3i | basilar | 5  | 725,6  | 145,1 |
| CIMT/G-CSF | 311-16-1i | basilar | 10 | 1288,8 | 128,9 |
| CIMT/G-CSF | 311-17-1i | basilar | 6  | 3458,7 | 576,4 |
| CIMT/G-CSF | 311-17-2i | basilar | 7  | 3068,7 | 438,4 |
| CIMT/G-CSF | 311-18-1i | basilar | 5  | 823,8  | 164,8 |
| CIMT/G-CSF | 311-19-1i | basilar | 8  | 2073,3 | 259,2 |
| CIMT/G-CSF | 313-14.1i | basilar | 5  | 806,9  | 161,4 |
| CIMT/G-CSF | 313-15-1i | basilar | 4  | 950,4  | 237,6 |
| CIMT/G-CSF | 313-17-1i | basilar | 5  | 972,5  | 194,5 |
| CIMT/G-CSF | 313-19-1i | basilar | 6  | 535,8  | 89,3  |
| CIMT/G-CSF | 313-19-2i | basilar | 6  | 995,6  | 165,9 |
| CIMT/G-CSF | 314-16-1i | basilar | 7  | 1711,2 | 244,5 |

|            |           |         |    |        |       |
|------------|-----------|---------|----|--------|-------|
| CIMT/G-CSF | 314-16-2i | basilar | 3  | 515,9  | 172   |
| CIMT/G-CSF | 314-17-1i | basilar | 4  | 1853,9 | 463,5 |
| CIMT/G-CSF | 314-17-2i | basilar | 5  | 1149,1 | 229,8 |
| CIMT/G-CSF | 314-18-1i | basilar | 3  | 198,3  | 66,1  |
| CIMT/G-CSF | 315-11-1i | basilar | 8  | 597,9  | 74,7  |
| CIMT/G-CSF | 315-11-2i | basilar | 8  | 757,5  | 94,7  |
| CIMT/G-CSF | 315-13-1i | basilar | 3  | 1584,5 | 528,2 |
| CIMT/G-CSF | 315-13-2i | basilar | 4  | 664,7  | 166,2 |
| CIMT/G-CSF | 315-14-1i | basilar | 3  | 213,9  | 71,3  |
| CIMT/G-CSF | 315-14-2i | basilar | 4  | 542    | 135,5 |
| G-CSF      | 220-7-1i  | basilar | 5  | 1430,4 | 286,1 |
| G-CSF      | 220-16-1i | basilar | 5  | 785,8  | 157,2 |
| G-CSF      | 220-17-1i | basilar | 7  | 1139,9 | 162,8 |
| G-CSF      | 220-18-1i | basilar | 6  | 1246,1 | 207,7 |
| G-CSF      | 220-19-1i | basilar | 5  | 1608,7 | 321,7 |
| G-CSF      | 221-6-1i  | basilar | 6  | 1636   | 272,7 |
| G-CSF      | 221-13-1i | basilar | 5  | 1336,2 | 267,2 |
| G-CSF      | 221-16-1i | basilar | 7  | 3276,6 | 468,1 |
| G-CSF      | 221-19-1i | basilar | 5  | 3331,9 | 666,4 |
| G-CSF      | 221-22-1i | basilar | 5  | 1655,7 | 331,1 |
| G-CSF      | 222-8-1i  | basilar | 9  | 2017,7 | 224,2 |
| G-CSF      | 222-16-1i | basilar | 6  | 809,3  | 134,9 |
| G-CSF      | 222-17-1i | basilar | 6  | 1864,4 | 310,7 |
| G-CSF      | 222-21-1i | basilar | 5  | 1975,2 | 395   |
| G-CSF      | 222-23-1i | basilar | 8  | 1425,8 | 178,2 |
| G-CSF      | 301-18-1i | basilar | 3  | 289,3  | 96,4  |
| G-CSF      | 301-19-1i | basilar | 5  | 407,9  | 81,6  |
| G-CSF      | 301-20-1i | basilar | 8  | 724,6  | 90,6  |
| G-CSF      | 301-20-2i | basilar | 6  | 1701,3 | 283,6 |
| G-CSF      | 301-20-3i | basilar | 5  | 1976,4 | 395,3 |
| G-CSF      | 302-16-1i | basilar | 6  | 399,2  | 66,5  |
| G-CSF      | 302-16-2i | basilar | 5  | 187,4  | 37,5  |
| G-CSF      | 302-17-1i | basilar | 6  | 301,8  | 50,3  |
| G-CSF      | 302-17-2i | basilar | 5  | 724,4  | 144,9 |
| G-CSF      | 302-18-1i | basilar | 5  | 577,3  | 115,5 |
| G-CSF      | 303-15-1i | basilar | 4  | 992,9  | 248,2 |
| G-CSF      | 303-16-1i | basilar | 10 | 2119,3 | 211,9 |
| G-CSF      | 303-16-2i | basilar | 7  | 1038,5 | 148,4 |
| G-CSF      | 303-17-1i | basilar | 4  | 987    | 246,7 |
| G-CSF      | 303-17-2i | basilar | 4  | 692,9  | 173,2 |

### Data Figure 3

Dendrite length per neuron peri-infarct cortex

| Group      | animal No | length basilar | number of neurons | length per neuron basilar | length apical | length per neuron apical |
|------------|-----------|----------------|-------------------|---------------------------|---------------|--------------------------|
| Control    | 215       | 4332,8         | 5                 | 866,6                     | 2819,2        | 563,8                    |
| Control    | 216       | 4586,8         | 6                 | 764,5                     | 3497,3        | 582,9                    |
| Control    | 219       | 6088,5         | 5                 | 1217,7                    | 3835,5        | 767,1                    |
| Control    | 297       | 4873,4         | 5                 | 974,7                     | 4077,6        | 815,5                    |
| Control    | 298       | 3894,8         | 6                 | 649,1                     | 4292,9        | 715,5                    |
| Control    | 308       | 5064,6         | 5                 | 1012,9                    | 3709,3        | 741,9                    |
| CIMT       | 211       | 7159,1         | 5                 | 1431,8                    | 3418,1        | 683,6                    |
| CIMT       | 212       | 3160,4         | 7                 | 451,5                     | 2708,8        | 387,0                    |
| CIMT       | 218       | 5588,4         | 5                 | 1117,7                    | 3088,8        | 617,8                    |
| CIMT       | 299       | 3566           | 5                 | 713,2                     | 3055,9        | 611,2                    |
| CIMT       | 300       | 5834,7         | 5                 | 1166,9                    | 2711,2        | 542,2                    |
| CIMT       | 309       | 5917,7         | 5                 | 1183,5                    | 4265,6        | 853,1                    |
| CIMT+G-CSF | 213       | 3973,9         | 6                 | 662,3                     | 2515,2        | 419,2                    |
| CIMT+G-CSF | 214       | 4017,4         | 5                 | 803,5                     | 2418,6        | 483,7                    |
| CIMT+G-CSF | 217       | 7930,3         | 7                 | 1132,9                    | 4743,1        | 677,6                    |
| CIMT+G-CSF | 304       | 4372,5         | 5                 | 874,5                     | 2002,1        | 400,4                    |
| CIMT+G-CSF | 305       | 3673,8         | 5                 | 734,8                     | 2297,8        | 459,6                    |
| CIMT/G-CSF | 306       | 4095           | 5                 | 819,0                     | 2687,7        | 537,5                    |
| CIMT/G-CSF | 311       | 10713,3        | 5                 | 2142,7                    | 4456,8        | 891,4                    |
| CIMT/G-CSF | 313       | 4261,2         | 5                 | 852,2                     | 2940,7        | 588,1                    |
| CIMT/G-CSF | 314       | 5428,4         | 5                 | 1085,7                    | 3384,5        | 676,9                    |
| CIMT/G-CSF | 315       | 4360,5         | 6                 | 726,8                     | 2911,7        | 485,3                    |
| G-CSF      | 220       | 6210,9         | 5                 | 1242,2                    | 2499,2        | 499,8                    |
| G-CSF      | 221       | 11236,4        | 5                 | 2247,3                    | 2719,5        | 543,9                    |
| G-CSF      | 222       | 8092,4         | 5                 | 1618,5                    | 3145,2        | 629,0                    |
| G-CSF      | 301       | 5099,5         | 4                 | 1274,9                    | 1694,7        | 423,7                    |
| G-CSF      | 302       | 3190,1         | 5                 | 638                       | 1821,2        | 364,2                    |
| G-CSF      | 303       | 5830,6         | 5                 | 1166,1                    | 2974,7        | 594,9                    |

## Data Figure 5

Intersections per Group

| Group      | number | No of neurons | Qty basilar | Qty per neuron basilar | Qty apical | Qty per neuron apical |
|------------|--------|---------------|-------------|------------------------|------------|-----------------------|
| Control    | 215    | 5             | 312         | 62,4                   | 150        | 30,0                  |
| Control    | 216    | 6             | 328         | 54,7                   | 226        | 37,7                  |
| Control    | 219    | 5             | 495         | 99,0                   | 241        | 48,2                  |
| Control    | 297    | 5             | 339         | 67,8                   | 257        | 51,4                  |
| Control    | 298    | 6             | 293         | 48,8                   | 304        | 50,7                  |
| Control    | 308    | 5             | 337         | 67,4                   | 259        | 51,8                  |
| CIMT       | 211    | 5             | 523         | 104,6                  | 220        | 44,0                  |
| CIMT       | 212    | 7             | 246         | 35,1                   | 204        | 29,1                  |
| CIMT       | 299    | 5             | 271         | 54,2                   | 222        | 44,4                  |
| CIMT       | 300    | 5             | 437         | 87,4                   | 213        | 42,6                  |
| CIMT       | 309    | 5             | 456         | 91,2                   | 196        | 39,2                  |
| CIMT       | 218    | 5             | 423         | 84,6                   | 301        | 60,2                  |
| CIMT+G-CSF | 213    | 6             | 282         | 47,0                   | 184        | 30,7                  |
| CIMT+G-CSF | 214    | 5             | 263         | 52,6                   | 252        | 50,4                  |
| CIMT+G-CSF | 217    | 7             | 609         | 87,0                   | 220        | 31,4                  |
| CIMT+G-CSF | 304    | 5             | 342         | 68,4                   | 240        | 48,0                  |
| CIMT+G-CSF | 305    | 5             | 254         | 50,8                   | 85         | 17,0                  |
| CIMT/G-CSF | 306    | 5             | 295         | 59,0                   | 204        | 40,8                  |
| CIMT/G-CSF | 311    | 5             | 786         | 157,2                  | 154        | 30,8                  |
| CIMT/G-CSF | 313    | 5             | 297         | 59,4                   | 155        | 31,0                  |
| CIMT/G-CSF | 314    | 5             | 403         | 80,6                   | 327        | 65,4                  |
| CIMT/G-CSF | 315    | 6             | 327         | 54,5                   | 110        | 18,3                  |
| G-CSF      | 220    | 5             | 459         | 91,8                   | 137        | 27,4                  |
| G-CSF      | 221    | 5             | 880         | 176,0                  | 166        | 33,2                  |
| G-CSF      | 222    | 5             | 653         | 130,6                  | 361        | 72,2                  |
| G-CSF      | 301    | 4             | 401         | 100,3                  | 204        | 51,0                  |
| G-CSF      | 302    | 5             | 176         | 35,2                   | 224        | 44,8                  |
| G-CSF      | 303    | 5             | 435         | 87,0                   | 190        | 38,0                  |
| Group      | Number | No of neurons | Qty total   | Qty per neuron total   |            |                       |
| Control    | 215    | 5             | 462         | 92,4                   |            |                       |
| Control    | 216    | 6             | 554         | 92,3                   |            |                       |
| Control    | 219    | 5             | 736         | 147,2                  |            |                       |
| Control    | 297    | 5             | 596         | 119,2                  |            |                       |
| Control    | 298    | 6             | 597         | 99,5                   |            |                       |
| Control    | 308    | 5             | 596         | 119,2                  |            |                       |
| CIMT       | 211    | 5             | 743         | 148,6                  |            |                       |
| CIMT       | 212    | 7             | 450         | 64,3                   |            |                       |
| CIMT       | 299    | 5             | 493         | 98,6                   |            |                       |
| CIMT       | 300    | 5             | 650         | 130,0                  |            |                       |
| CIMT       | 309    | 5             | 652         | 130,4                  |            |                       |
| CIMT       | 218    | 5             | 724         | 144,8                  |            |                       |
| CIMT+G-CSF | 213    | 6             | 466         | 77,7                   |            |                       |
| CIMT+G-CSF | 214    | 5             | 515         | 103,0                  |            |                       |
| CIMT+G-CSF | 217    | 7             | 829         | 118,4                  |            |                       |
| CIMT+G-CSF | 304    | 5             | 582         | 116,4                  |            |                       |
| CIMT+G-CSF | 305    | 5             | 339         | 67,8                   |            |                       |
| CIMT/G-CSF | 306    | 5             | 499         | 99,8                   |            |                       |
| CIMT/G-CSF | 311    | 5             | 940         | 188,0                  |            |                       |
| CIMT/G-CSF | 313    | 5             | 452         | 90,4                   |            |                       |

|            |     |   |      |       |
|------------|-----|---|------|-------|
| CIMT/G-CSF | 314 | 5 | 730  | 146,0 |
| CIMT/G-CSF | 315 | 6 | 437  | 72,8  |
| G-CSF      | 220 | 5 | 596  | 119,2 |
| G-CSF      | 221 | 5 | 1046 | 209,2 |
| G-CSF      | 222 | 5 | 1014 | 202,8 |
| G-CSF      | 301 | 4 | 605  | 151,3 |
| G-CSF      | 302 | 5 | 400  | 80,0  |
| G-CSF      | 303 | 5 | 625  | 125,0 |

Data Figure 6

apical dendrite Sholl 10 $\mu$ m

| Group   | number    | Radius( $\mu$ m) | Intersections | Length( $\mu$ m) |
|---------|-----------|------------------|---------------|------------------|
| Control | 215-11-1i | 10               | 0             | 0                |
| Control | 215-15-1i | 10               | 1             | 3,1              |
| Control | 215-16-1i | 10               | 1             | 2                |
| Control | 215-18-1i | 10               | 1             | 2,2              |
| Control | 215-9-1i  | 10               | 1             | 1,3              |
| Control | 216-12-1i | 10               | 1             | 1,6              |
| Control | 216-18-1i | 10               | 0             | 0                |
| Control | 216-19-1i | 10               | 0             | 0                |
| Control | 216-22-1i | 10               | 0             | 0                |
| Control | 216-6-1i  | 10               | 0             | 0                |
| Control | 216-8-1i  | 10               | 1             | 0,1              |
| Control | 219-10-1i | 10               | 0             | 0                |
| Control | 219-14-1i | 10               | 0             | 0                |
| Control | 219-15-1i | 10               | 0             | 0                |
| Control | 219-17-1i | 10               | 0             | 0                |
| Control | 219-21-1i | 10               | 0             | 0                |
| Control | 297-19-1i | 10               | 0             | 0                |
| Control | 297-19-2i | 10               | 0             | 0                |
| Control | 297-20-1i | 10               | 0             | 0                |
| Control | 297-22-1i | 10               | 0             | 0                |
| Control | 297-22-2i | 10               | 0             | 0                |
| Control | 298-15-1i | 10               | 1             | 1,8              |
| Control | 298-15-2i | 10               | 1             | 3,5              |
| Control | 298-16-1i | 10               | 0             | 0                |
| Control | 298-17-1i | 10               | 1             | 0,2              |
| Control | 298-18-1i | 10               | 0             | 0                |
| Control | 308-17-1i | 10               | 0             | 0                |
| Control | 308-18-1i | 10               | 1             | 4                |
| Control | 308-18-2i | 10               | 0             | 0                |
| Control | 308-21-1i | 10               | 0             | 0                |
| Control | 308-21-2i | 10               | 2             | 2,5              |
| CIMT    | 211-10-1i | 10               | 0             | 0                |
| CIMT    | 211-13-1i | 10               | 1             | 1,2              |
| CIMT    | 211-13-2i | 10               | 1             | 2,7              |
| CIMT    | 211-14-1i | 10               | 0             | 0                |
| CIMT    | 211-14-2i | 10               | 0             | 0                |
| CIMT    | 211-15-1i | 10               | 0             | 0                |
| CIMT    | 211-15-2i | 10               | 0             | 0                |
| CIMT    | 212-13-1i | 10               | 1             | 0,7              |

|            |           |    |   |      |
|------------|-----------|----|---|------|
| CIMT       | 212-13-2i | 10 | 0 | 0    |
| CIMT       | 212-14-1i | 10 | 0 | 0    |
| CIMT       | 212-14-2i | 10 | 1 | 1,7  |
| CIMT       | 212-15-1i | 10 | 1 | 3,7  |
| CIMT       | 218-11-1i | 10 | 1 | 2,5  |
| CIMT       | 218-14-1i | 10 | 0 | 0    |
| CIMT       | 218-16-1i | 10 | 0 | 0    |
| CIMT       | 218-17-1i | 10 | 0 | 0    |
| CIMT       | 218-19-1i | 10 | 0 | 0    |
| CIMT       | 299-14-1i | 10 | 1 | 0,7  |
| CIMT       | 299-14-2i | 10 | 0 | 0    |
| CIMT       | 299-15-1i | 10 | 1 | 0    |
| CIMT       | 299-16-1i | 10 | 0 | 0    |
| CIMT       | 299-17-1i | 10 | 0 | 0    |
| CIMT       | 300-16-1i | 10 | 1 | 2,5  |
| CIMT       | 300-20-1i | 10 | 0 | 0    |
| CIMT       | 300-22-1i | 10 | 0 | 0    |
| CIMT       | 300-24-1i | 10 | 0 | 0    |
| CIMT       | 300-24-2i | 10 | 0 | 0    |
| CIMT       | 309-15-1i | 10 | 0 | 0    |
| CIMT       | 309-15-2i | 10 | 0 | 0    |
| CIMT       | 309-16-1i | 10 | 1 | 7,1  |
| CIMT       | 309-16-2i | 10 | 0 | 0    |
| CIMT       | 309-17-1i | 10 | 0 | 0    |
| CIMT+G-CSF | 213-12-1i | 10 | 1 | 2,4  |
| CIMT+G-CSF | 213-14-1i | 10 | 3 | 12,2 |
| CIMT+G-CSF | 213-17-1i | 10 | 1 | 0,9  |
| CIMT+G-CSF | 213-18-1i | 10 | 0 | 0    |
| CIMT+G-CSF | 213-8-1i  | 10 | 0 | 0    |
| CIMT+G-CSF | 214-14-1i | 10 | 0 | 0    |
| CIMT+G-CSF | 214-14-2i | 10 | 0 | 0    |
| CIMT+G-CSF | 214-17-1i | 10 | 0 | 0    |
| CIMT+G-CSF | 214-18-1i | 10 | 1 | 2,2  |
| CIMT+G-CSF | 214-19-1i | 10 | 0 | 0    |
| CIMT+G-CSF | 217-10-1i | 10 | 1 | 3,2  |
| CIMT+G-CSF | 217-16-1i | 10 | 0 | 0    |
| CIMT+G-CSF | 217-17-1i | 10 | 0 | 0    |
| CIMT+G-CSF | 217-6-1i  | 10 | 0 | 0    |
| CIMT+G-CSF | 217-8-1i  | 10 | 1 | 1,3  |
| CIMT+G-CSF | 304-17-1i | 10 | 1 | 8    |
| CIMT+G-CSF | 304-19-1i | 10 | 2 | 0,1  |
| CIMT+G-CSF | 304-19-2i | 10 | 0 | 0    |
| CIMT+G-CSF | 304-20-1i | 10 | 1 | 5    |
| CIMT+G-CSF | 304-21-1i | 10 | 0 | 0    |
| CIMT+G-CSF | 304-21-2i | 10 | 1 | 0,9  |
| CIMT+G-CSF | 304-22-1i | 10 | 1 | 6,7  |
| CIMT+G-CSF | 305-17-1i | 10 | 1 | 0,6  |
| CIMT+G-CSF | 305-17-2i | 10 | 1 | 1,1  |
| CIMT+G-CSF | 305-18-1i | 10 | 0 | 0    |
| CIMT+G-CSF | 305-19-1i | 10 | 1 | 2,2  |
| CIMT+G-CSF | 305-19-2i | 10 | 0 | 0    |
| CIMT/G-CSF | 306-17-1i | 10 | 1 | 1,9  |
| CIMT/G-CSF | 306-17-2i | 10 | 0 | 0    |
| CIMT/G-CSF | 306-18-1i | 10 | 0 | 0    |
| CIMT/G-CSF | 306-18-2i | 10 | 1 | 1,4  |
| CIMT/G-CSF | 306-18-3i | 10 | 0 | 0    |

|                      |    |   |     |
|----------------------|----|---|-----|
| CIMT/G-CSF 311-16-1i | 10 | 0 | 0   |
| CIMT/G-CSF 311-17-1i | 10 | 0 | 0   |
| CIMT/G-CSF 311-17-2i | 10 | 0 | 0   |
| CIMT/G-CSF 311-18-1i | 10 | 0 | 0   |
| CIMT/G-CSF 311-19-1i | 10 | 0 | 0   |
| CIMT/G-CSF 313-14.1i | 10 | 1 | 8,5 |
| CIMT/G-CSF 313-15-1i | 10 | 0 | 0   |
| CIMT/G-CSF 313-17-1i | 10 | 0 | 0   |
| CIMT/G-CSF 313-19-1i | 10 | 1 | 1,9 |
| CIMT/G-CSF 313-19-2i | 10 | 1 | 0,4 |
| CIMT/G-CSF 314-16-1i | 10 | 1 | 2,1 |
| CIMT/G-CSF 314-16-2i | 10 | 0 | 0   |
| CIMT/G-CSF 314-17-1i | 10 | 0 | 0   |
| CIMT/G-CSF 314-17-2i | 10 | 0 | 0   |
| CIMT/G-CSF 314-18-1i | 10 | 1 | 1,9 |
| CIMT/G-CSF 315-11-1i | 10 | 0 | 0   |
| CIMT/G-CSF 315-11-2i | 10 | 0 | 0   |
| CIMT/G-CSF 315-13-1i | 10 | 0 | 0   |
| CIMT/G-CSF 315-13-2i | 10 | 0 | 0   |
| CIMT/G-CSF 315-14-1i | 10 | 0 | 0   |
| CIMT/G-CSF 315-14-2i | 10 | 1 | 0,8 |
| G-CSF 220-16-1i      | 10 | 0 | 0   |
| G-CSF 220-17-1i      | 10 | 1 | 0,5 |
| G-CSF 220-18-1i      | 10 | 0 | 0   |
| G-CSF 220-19-1i      | 10 | 0 | 0   |
| G-CSF 220-7-1i       | 10 | 0 | 0   |
| G-CSF 221-13-1i      | 10 | 0 | 0   |
| G-CSF 221-16-1i      | 10 | 0 | 0   |
| G-CSF 221-19-1i      | 10 | 0 | 0   |
| G-CSF 221-22-1i      | 10 | 0 | 0   |
| G-CSF 221-6-1i       | 10 | 1 | 1,2 |
| G-CSF 222-16-1i      | 10 | 0 | 0   |
| G-CSF 222-17-1i      | 10 | 0 | 0   |
| G-CSF 222-21-1i      | 10 | 0 | 0   |
| G-CSF 222-23-1i      | 10 | 1 | 0,6 |
| G-CSF 222-8-1i       | 10 | 0 | 0   |
| G-CSF 301-18-1i      | 10 | 5 | 12  |
| G-CSF 301-19-1i      | 10 | 1 | 0,4 |
| G-CSF 301-20-1i      | 10 | 0 | 0   |
| G-CSF 301-20-2i      | 10 | 0 | 0   |
| G-CSF 301-20-3i      | 10 | 0 | 0   |
| G-CSF 302-16-1i      | 10 | 0 | 0   |
| G-CSF 302-16-2i      | 10 | 1 | 3,8 |
| G-CSF 302-17-1i      | 10 | 1 | 4,6 |
| G-CSF 302-17-2i      | 10 | 1 | 1,7 |
| G-CSF 302-18-1i      | 10 | 1 | 0,4 |
| G-CSF 303-15-1i      | 10 | 0 | 0   |
| G-CSF 303-16-1i      | 10 | 0 | 0   |
| G-CSF 303-16-2i      | 10 | 1 | 1,2 |
| G-CSF 303-17-1i      | 10 | 1 | 0   |
| G-CSF 303-17-2i      | 10 | 0 | 0   |



apical dendrite Sholl 20 $\mu$ m

| Group   | number    | Radius( $\mu$ m) | Intersections | Length( $\mu$ m) |
|---------|-----------|------------------|---------------|------------------|
| Control | 215-11-1i | 20               | 1             | 13,3             |
| Control | 215-15-1i | 20               | 1             | 10,6             |
| Control | 215-16-1i | 20               | 2             | 15,5             |
| Control | 215-18-1i | 20               | 2             | 17,8             |
| Control | 215-9-1i  | 20               | 4             | 85,9             |
| Control | 216-12-1i | 20               | 1             | 27,4             |
| Control | 216-18-1i | 20               | 1             | 29,7             |
| Control | 216-19-1i | 20               | 1             | 7,6              |
| Control | 216-22-1i | 20               | 1             | 15,4             |
| Control | 216-6-1i  | 20               | 0             | 0                |
| Control | 216-8-1i  | 20               | 2             | 28,2             |
| Control | 219-10-1i | 20               | 1             | 5,4              |
| Control | 219-14-1i | 20               | 1             | 9,2              |
| Control | 219-15-1i | 20               | 2             | 15,9             |
| Control | 219-17-1i | 20               | 1             | 5,3              |
| Control | 219-21-1i | 20               | 1             | 10,1             |
| Control | 297-19-1i | 20               | 1             | 7,9              |
| Control | 297-19-2i | 20               | 1             | 9                |
| Control | 297-20-1i | 20               | 1             | 9,3              |
| Control | 297-22-1i | 20               | 2             | 31,5             |
| Control | 297-22-2i | 20               | 6             | 18,7             |
| Control | 298-15-1i | 20               | 2             | 21,1             |
| Control | 298-15-2i | 20               | 1             | 10,3             |
| Control | 298-16-1i | 20               | 1             | 6,6              |
| Control | 298-17-1i | 20               | 3             | 23,8             |
| Control | 298-18-1i | 20               | 1             | 1,1              |
| Control | 308-17-1i | 20               | 1             | 11,1             |
| Control | 308-18-1i | 20               | 1             | 11,8             |
| Control | 308-18-2i | 20               | 1             | 10,4             |
| Control | 308-21-1i | 20               | 2             | 22,5             |
| Control | 308-21-2i | 20               | 3             | 39,7             |
| CIMT    | 211-10-1i | 20               | 0             | 0                |
| CIMT    | 211-13-1i | 20               | 1             | 10,5             |
| CIMT    | 211-13-2i | 20               | 1             | 10,6             |
| CIMT    | 211-14-1i | 20               | 1             | 8,9              |
| CIMT    | 211-14-2i | 20               | 1             | 10,3             |
| CIMT    | 211-15-1i | 20               | 1             | 9,8              |
| CIMT    | 211-15-2i | 20               | 1             | 8,7              |
| CIMT    | 212-13-1i | 20               | 1             | 10,8             |
| CIMT    | 212-13-2i | 20               | 1             | 8,6              |
| CIMT    | 212-14-1i | 20               | 2             | 14               |
| CIMT    | 212-14-2i | 20               | 2             | 14,1             |
| CIMT    | 212-15-1i | 20               | 1             | 10,3             |
| CIMT    | 218-11-1i | 20               | 2             | 30,8             |
| CIMT    | 218-14-1i | 20               | 1             | 9,7              |
| CIMT    | 218-16-1i | 20               | 0             | 0                |
| CIMT    | 218-17-1i | 20               | 1             | 6,9              |
| CIMT    | 218-19-1i | 20               | 1             | 9,6              |
| CIMT    | 299-14-1i | 20               | 1             | 11,8             |
| CIMT    | 299-14-2i | 20               | 2             | 21,6             |
| CIMT    | 299-15-1i | 20               | 1             | 11,2             |
| CIMT    | 299-16-1i | 20               | 1             | 10,6             |

|            |           |    |   |      |
|------------|-----------|----|---|------|
| CIMT       | 299-17-1i | 20 | 1 | 8,3  |
| CIMT       | 300-16-1i | 20 | 1 | 10,6 |
| CIMT       | 300-20-1i | 20 | 2 | 22,3 |
| CIMT       | 300-22-1i | 20 | 1 | 10   |
| CIMT       | 300-24-1i | 20 | 1 | 9,4  |
| CIMT       | 300-24-2i | 20 | 2 | 25,2 |
| CIMT       | 309-15-1i | 20 | 1 | 9,9  |
| CIMT       | 309-15-2i | 20 | 3 | 28,5 |
| CIMT       | 309-16-1i | 20 | 2 | 16,5 |
| CIMT       | 309-16-2i | 20 | 2 | 9,5  |
| CIMT       | 309-17-1i | 20 | 2 | 19,4 |
| CIMT+G-CSF | 213-12-1i | 20 | 3 | 35,3 |
| CIMT+G-CSF | 213-14-1i | 20 | 1 | 27,4 |
| CIMT+G-CSF | 213-17-1i | 20 | 1 | 10,2 |
| CIMT+G-CSF | 213-18-1i | 20 | 1 | 9,7  |
| CIMT+G-CSF | 213-8-1i  | 20 | 3 | 19,9 |
| CIMT+G-CSF | 214-14-1i | 20 | 1 | 8,7  |
| CIMT+G-CSF | 214-14-2i | 20 | 2 | 17,8 |
| CIMT+G-CSF | 214-17-1i | 20 | 1 | 11,5 |
| CIMT+G-CSF | 214-18-1i | 20 | 3 | 28,5 |
| CIMT+G-CSF | 214-19-1i | 20 | 1 | 1,8  |
| CIMT+G-CSF | 217-10-1i | 20 | 1 | 10,6 |
| CIMT+G-CSF | 217-16-1i | 20 | 0 | 0    |
| CIMT+G-CSF | 217-17-1i | 20 | 1 | 8,6  |
| CIMT+G-CSF | 217-6-1i  | 20 | 2 | 19,4 |
| CIMT+G-CSF | 217-8-1i  | 20 | 2 | 12,5 |
| CIMT+G-CSF | 304-17-1i | 20 | 1 | 14,3 |
| CIMT+G-CSF | 304-19-1i | 20 | 1 | 11   |
| CIMT+G-CSF | 304-19-2i | 20 | 1 | 12   |
| CIMT+G-CSF | 304-20-1i | 20 | 1 | 11,6 |
| CIMT+G-CSF | 304-21-1i | 20 | 1 | 10,1 |
| CIMT+G-CSF | 304-21-2i | 20 | 1 | 11,3 |
| CIMT+G-CSF | 304-22-1i | 20 | 1 | 10,1 |
| CIMT+G-CSF | 305-17-1i | 20 | 1 | 13,5 |
| CIMT+G-CSF | 305-17-2i | 20 | 1 | 11,7 |
| CIMT+G-CSF | 305-18-1i | 20 | 1 | 10,5 |
| CIMT+G-CSF | 305-19-1i | 20 | 1 | 10,2 |
| CIMT+G-CSF | 305-19-2i | 20 | 1 | 11,8 |
| CIMT/G-CSF | 306-17-1i | 20 | 1 | 10,2 |
| CIMT/G-CSF | 306-17-2i | 20 | 1 | 11   |
| CIMT/G-CSF | 306-18-1i | 20 | 1 | 11   |
| CIMT/G-CSF | 306-18-2i | 20 | 1 | 11,3 |
| CIMT/G-CSF | 306-18-3i | 20 | 1 | 10,4 |
| CIMT/G-CSF | 311-16-1i | 20 | 1 | 11   |
| CIMT/G-CSF | 311-17-1i | 20 | 1 | 8,7  |
| CIMT/G-CSF | 311-17-2i | 20 | 1 | 5,6  |
| CIMT/G-CSF | 311-18-1i | 20 | 2 | 15,9 |
| CIMT/G-CSF | 311-19-1i | 20 | 1 | 9,8  |
| CIMT/G-CSF | 313-14-1i | 20 | 2 | 19,8 |
| CIMT/G-CSF | 313-15-1i | 20 | 4 | 33,5 |
| CIMT/G-CSF | 313-17-1i | 20 | 2 | 21,5 |
| CIMT/G-CSF | 313-19-1i | 20 | 1 | 12,4 |
| CIMT/G-CSF | 313-19-2i | 20 | 2 | 29,6 |
| CIMT/G-CSF | 314-16-1i | 20 | 2 | 15,8 |
| CIMT/G-CSF | 314-16-2i | 20 | 5 | 63,9 |
| CIMT/G-CSF | 314-17-1i | 20 | 1 | 11,8 |

|            |           |    |   |       |
|------------|-----------|----|---|-------|
| CIMT/G-CSF | 314-17-2i | 20 | 1 | 9,5   |
| CIMT/G-CSF | 314-18-1i | 20 | 1 | 11,6  |
| CIMT/G-CSF | 315-11-1i | 20 | 1 | 8,4   |
| CIMT/G-CSF | 315-11-2i | 20 | 2 | 19,9  |
| CIMT/G-CSF | 315-13-1i | 20 | 1 | 10    |
| CIMT/G-CSF | 315-13-2i | 20 | 2 | 24,5  |
| CIMT/G-CSF | 315-14-1i | 20 | 1 | 17,7  |
| CIMT/G-CSF | 315-14-2i | 20 | 2 | 13,2  |
| G-CSF      | 220-16-1i | 20 | 2 | 15,7  |
| G-CSF      | 220-17-1i | 20 | 2 | 13,3  |
| G-CSF      | 220-18-1i | 20 | 1 | 11,1  |
| G-CSF      | 220-19-1i | 20 | 0 | 0     |
| G-CSF      | 220-7-1i  | 20 | 2 | 21,3  |
| G-CSF      | 221-13-1i | 20 | 2 | 16,6  |
| G-CSF      | 221-16-1i | 20 | 1 | 7,7   |
| G-CSF      | 221-19-1i | 20 | 1 | 7,3   |
| G-CSF      | 221-22-1i | 20 | 1 | 9,1   |
| G-CSF      | 221-6-1i  | 20 | 1 | 10,3  |
| G-CSF      | 222-16-1i | 20 | 1 | 9,9   |
| G-CSF      | 222-17-1i | 20 | 1 | 9,5   |
| G-CSF      | 222-21-1i | 20 | 1 | 9,9   |
| G-CSF      | 222-23-1i | 20 | 3 | 14,4  |
| G-CSF      | 222-8-1i  | 20 | 1 | 10,3  |
| G-CSF      | 301-18-1i | 20 | 9 | 131,3 |
| G-CSF      | 301-19-1i | 20 | 1 | 10,8  |
| G-CSF      | 301-20-1i | 20 | 1 | 8,5   |
| G-CSF      | 301-20-2i | 20 | 1 | 12,5  |
| G-CSF      | 301-20-3i | 20 | 1 | 12,8  |
| G-CSF      | 302-16-1i | 20 | 1 | 10,7  |
| G-CSF      | 302-16-2i | 20 | 4 | 33    |
| G-CSF      | 302-17-1i | 20 | 1 | 10,6  |
| G-CSF      | 302-17-2i | 20 | 1 | 10,8  |
| G-CSF      | 302-18-1i | 20 | 1 | 10,1  |
| G-CSF      | 303-15-1i | 20 | 1 | 8,6   |
| G-CSF      | 303-16-1i | 20 | 2 | 31,7  |
| G-CSF      | 303-16-2i | 20 | 2 | 23,4  |
| G-CSF      | 303-17-1i | 20 | 1 | 16    |
| G-CSF      | 303-17-2i | 20 | 2 | 40    |

apical dendrite Sholl 30µm

| Group   | number    | Radius(µm) | Intersections | Length(µm) |
|---------|-----------|------------|---------------|------------|
| Control | 215-11-1i | 30         | 1             | 10,3       |
| Control | 215-15-1i | 30         | 1             | 10,6       |
| Control | 215-16-1i | 30         | 2             | 31         |
| Control | 215-18-1i | 30         | 3             | 42,5       |
| Control | 215-9-1i  | 30         | 4             | 53,3       |
| Control | 216-12-1i | 30         | 2             | 26         |
| Control | 216-18-1i | 30         | 1             | 11,1       |
| Control | 216-19-1i | 30         | 1             | 10,1       |
| Control | 216-22-1i | 30         | 2             | 22         |
| Control | 216-6-1i  | 30         | 4             | 15,1       |
| Control | 216-8-1i  | 30         | 2             | 27,9       |
| Control | 219-10-1i | 30         | 2             | 26,4       |
| Control | 219-14-1i | 30         | 1             | 12,6       |

|            |           |    |   |       |
|------------|-----------|----|---|-------|
| Control    | 219-15-1i | 30 | 2 | 33    |
| Control    | 219-17-1i | 30 | 1 | 32,8  |
| Control    | 219-21-1i | 30 | 2 | 17,5  |
| Control    | 297-19-1i | 30 | 2 | 26    |
| Control    | 297-19-2i | 30 | 1 | 10,5  |
| Control    | 297-20-1i | 30 | 1 | 10,5  |
| Control    | 297-22-1i | 30 | 2 | 27    |
| Control    | 297-22-2i | 30 | 7 | 98,5  |
| Control    | 298-15-1i | 30 | 2 | 24,7  |
| Control    | 298-15-2i | 30 | 2 | 31,8  |
| Control    | 298-16-1i | 30 | 1 | 13,5  |
| Control    | 298-17-1i | 30 | 2 | 26,8  |
| Control    | 298-18-1i | 30 | 3 | 37,1  |
| Control    | 308-17-1i | 30 | 3 | 28,4  |
| Control    | 308-18-1i | 30 | 1 | 14,4  |
| Control    | 308-18-2i | 30 | 2 | 25    |
| Control    | 308-21-1i | 30 | 5 | 79,1  |
| Control    | 308-21-2i | 30 | 2 | 35,6  |
| CIMT       | 211-10-1i | 30 | 2 | 1,9   |
| CIMT       | 211-13-1i | 30 | 1 | 10,1  |
| CIMT       | 211-13-2i | 30 | 3 | 49,9  |
| CIMT       | 211-14-1i | 30 | 2 | 32,4  |
| CIMT       | 211-14-2i | 30 | 1 | 10,5  |
| CIMT       | 211-15-1i | 30 | 1 | 10,3  |
| CIMT       | 211-15-2i | 30 | 1 | 10,9  |
| CIMT       | 212-13-1i | 30 | 1 | 14,6  |
| CIMT       | 212-13-2i | 30 | 2 | 26,2  |
| CIMT       | 212-14-1i | 30 | 4 | 77,1  |
| CIMT       | 212-14-2i | 30 | 2 | 30    |
| CIMT       | 212-15-1i | 30 | 1 | 10,4  |
| CIMT       | 218-11-1i | 30 | 3 | 31,5  |
| CIMT       | 218-14-1i | 30 | 1 | 11    |
| CIMT       | 218-16-1i | 30 | 1 | 9,1   |
| CIMT       | 218-17-1i | 30 | 1 | 10,3  |
| CIMT       | 218-19-1i | 30 | 2 | 16,4  |
| CIMT       | 299-14-1i | 30 | 1 | 10,2  |
| CIMT       | 299-14-2i | 30 | 3 | 44,7  |
| CIMT       | 299-15-1i | 30 | 3 | 42,2  |
| CIMT       | 299-16-1i | 30 | 1 | 10,2  |
| CIMT       | 299-17-1i | 30 | 2 | 52,8  |
| CIMT       | 300-16-1i | 30 | 2 | 12    |
| CIMT       | 300-20-1i | 30 | 3 | 49,1  |
| CIMT       | 300-22-1i | 30 | 2 | 13,8  |
| CIMT       | 300-24-1i | 30 | 3 | 50,6  |
| CIMT       | 300-24-2i | 30 | 2 | 21,5  |
| CIMT       | 309-15-1i | 30 | 3 | 59    |
| CIMT       | 309-15-2i | 30 | 4 | 60,1  |
| CIMT       | 309-16-1i | 30 | 5 | 80,2  |
| CIMT       | 309-16-2i | 30 | 1 | 11,8  |
| CIMT       | 309-17-1i | 30 | 3 | 27,1  |
| CIMT+G-CSF | 213-12-1i | 30 | 3 | 50,3  |
| CIMT+G-CSF | 213-14-1i | 30 | 2 | 23,6  |
| CIMT+G-CSF | 213-17-1i | 30 | 2 | 11,6  |
| CIMT+G-CSF | 213-18-1i | 30 | 1 | 12,9  |
| CIMT+G-CSF | 213-8-1i  | 30 | 1 | 15,2  |
| CIMT+G-CSF | 214-14-1i | 30 | 4 | 107,8 |

|                      |    |   |       |
|----------------------|----|---|-------|
| CIMT+G-CSF 214-14-2i | 30 | 4 | 74,3  |
| CIMT+G-CSF 214-17-1i | 30 | 2 | 29    |
| CIMT+G-CSF 214-18-1i | 30 | 2 | 45,2  |
| CIMT+G-CSF 214-19-1i | 30 | 1 | 13,8  |
| CIMT+G-CSF 217-10-1i | 30 | 2 | 22,5  |
| CIMT+G-CSF 217-16-1i | 30 | 0 | 0     |
| CIMT+G-CSF 217-17-1i | 30 | 1 | 10,3  |
| CIMT+G-CSF 217-6-1i  | 30 | 2 | 27,5  |
| CIMT+G-CSF 217-8-1i  | 30 | 4 | 53,6  |
| CIMT+G-CSF 304-17-1i | 30 | 1 | 13,5  |
| CIMT+G-CSF 304-19-1i | 30 | 1 | 12,1  |
| CIMT+G-CSF 304-19-2i | 30 | 1 | 10,4  |
| CIMT+G-CSF 304-20-1i | 30 | 1 | 10,6  |
| CIMT+G-CSF 304-21-1i | 30 | 1 | 10,3  |
| CIMT+G-CSF 304-21-2i | 30 | 2 | 22    |
| CIMT+G-CSF 304-22-1i | 30 | 1 | 10,1  |
| CIMT+G-CSF 305-17-1i | 30 | 1 | 10,8  |
| CIMT+G-CSF 305-17-2i | 30 | 1 | 10,5  |
| CIMT+G-CSF 305-18-1i | 30 | 1 | 10,5  |
| CIMT+G-CSF 305-19-1i | 30 | 1 | 10,3  |
| CIMT+G-CSF 305-19-2i | 30 | 1 | 18    |
| CIMT/G-CSF 306-17-1i | 30 | 1 | 11,4  |
| CIMT/G-CSF 306-17-2i | 30 | 1 | 11    |
| CIMT/G-CSF 306-18-1i | 30 | 1 | 11    |
| CIMT/G-CSF 306-18-2i | 30 | 1 | 13,7  |
| CIMT/G-CSF 306-18-3i | 30 | 1 | 12,3  |
| CIMT/G-CSF 311-16-1i | 30 | 3 | 38,8  |
| CIMT/G-CSF 311-17-1i | 30 | 1 | 10,4  |
| CIMT/G-CSF 311-17-2i | 30 | 2 | 11,7  |
| CIMT/G-CSF 311-18-1i | 30 | 3 | 38,9  |
| CIMT/G-CSF 311-19-1i | 30 | 3 | 33,7  |
| CIMT/G-CSF 313-14-1i | 30 | 2 | 24,1  |
| CIMT/G-CSF 313-15-1i | 30 | 2 | 46,8  |
| CIMT/G-CSF 313-17-1i | 30 | 1 | 29,5  |
| CIMT/G-CSF 313-19-1i | 30 | 1 | 12,7  |
| CIMT/G-CSF 313-19-2i | 30 | 3 | 39,1  |
| CIMT/G-CSF 314-16-1i | 30 | 3 | 30,6  |
| CIMT/G-CSF 314-16-2i | 30 | 8 | 102,1 |
| CIMT/G-CSF 314-17-1i | 30 | 1 | 10,9  |
| CIMT/G-CSF 314-17-2i | 30 | 1 | 11,4  |
| CIMT/G-CSF 314-18-1i | 30 | 1 | 11,4  |
| CIMT/G-CSF 315-11-1i | 30 | 2 | 33,2  |
| CIMT/G-CSF 315-11-2i | 30 | 2 | 45,2  |
| CIMT/G-CSF 315-13-1i | 30 | 1 | 10,6  |
| CIMT/G-CSF 315-13-2i | 30 | 2 | 34,3  |
| CIMT/G-CSF 315-14-1i | 30 | 4 | 61,5  |
| CIMT/G-CSF 315-14-2i | 30 | 2 | 24    |
| G-CSF 220-16-1i      | 30 | 5 | 67,1  |
| G-CSF 220-17-1i      | 30 | 2 | 21,2  |
| G-CSF 220-18-1i      | 30 | 1 | 11,2  |
| G-CSF 220-19-1i      | 30 | 2 | 4,8   |
| G-CSF 220-7-1i       | 30 | 3 | 32,3  |
| G-CSF 221-13-1i      | 30 | 1 | 14,6  |
| G-CSF 221-16-1i      | 30 | 1 | 10,4  |
| G-CSF 221-19-1i      | 30 | 1 | 10,6  |
| G-CSF 221-22-1i      | 30 | 1 | 11,3  |

|       |           |    |    |       |
|-------|-----------|----|----|-------|
| G-CSF | 221-6-1i  | 30 | 1  | 11,2  |
| G-CSF | 222-16-1i | 30 | 2  | 25    |
| G-CSF | 222-17-1i | 30 | 1  | 10,7  |
| G-CSF | 222-21-1i | 30 | 2  | 16,4  |
| G-CSF | 222-23-1i | 30 | 2  | 36,4  |
| G-CSF | 222-8-1i  | 30 | 1  | 10,3  |
| G-CSF | 301-18-1i | 30 | 11 | 177,3 |
| G-CSF | 301-19-1i | 30 | 1  | 10,2  |
| G-CSF | 301-20-1i | 30 | 1  | 10,4  |
| G-CSF | 301-20-2i | 30 | 2  | 48,1  |
| G-CSF | 301-20-3i | 30 | 2  | 14,3  |
| G-CSF | 302-16-1i | 30 | 1  | 11    |
| G-CSF | 302-16-2i | 30 | 2  | 45,8  |
| G-CSF | 302-17-1i | 30 | 1  | 11,1  |
| G-CSF | 302-17-2i | 30 | 1  | 10,4  |
| G-CSF | 302-18-1i | 30 | 2  | 25,1  |
| G-CSF | 303-15-1i | 30 | 1  | 11,7  |
| G-CSF | 303-16-1i | 30 | 3  | 37,2  |
| G-CSF | 303-16-2i | 30 | 2  | 34,3  |
| G-CSF | 303-17-1i | 30 | 2  | 30,2  |
| G-CSF | 303-17-2i | 30 | 2  | 24,5  |

apical dendrite Sholl 40 $\mu$ m

| Group   | number    | Radius( $\mu$ m) | Intersections | Length( $\mu$ m) |
|---------|-----------|------------------|---------------|------------------|
| Control | 215-11-1i | 40               | 1             | 11,8             |
| Control | 215-15-1i | 40               | 2             | 30,9             |
| Control | 215-16-1i | 40               | 2             | 30,1             |
| Control | 215-18-1i | 40               | 3             | 39,2             |
| Control | 215-9-1i  | 40               | 3             | 47,1             |
| Control | 216-12-1i | 40               | 3             | 30,5             |
| Control | 216-18-1i | 40               | 1             | 20,5             |
| Control | 216-19-1i | 40               | 2             | 17,9             |
| Control | 216-22-1i | 40               | 2             | 23,5             |
| Control | 216-6-1i  | 40               | 5             | 115              |
| Control | 216-8-1i  | 40               | 6             | 110,7            |
| Control | 219-10-1i | 40               | 3             | 39,2             |
| Control | 219-14-1i | 40               | 1             | 11,5             |
| Control | 219-15-1i | 40               | 4             | 41,6             |
| Control | 219-17-1i | 40               | 3             | 18,8             |
| Control | 219-21-1i | 40               | 2             | 32,5             |
| Control | 297-19-1i | 40               | 2             | 25,4             |
| Control | 297-19-2i | 40               | 4             | 28,9             |
| Control | 297-20-1i | 40               | 1             | 10               |
| Control | 297-22-1i | 40               | 1             | 14,9             |
| Control | 297-22-2i | 40               | 4             | 64,5             |
| Control | 298-15-1i | 40               | 3             | 27,7             |
| Control | 298-15-2i | 40               | 3             | 31,6             |
| Control | 298-16-1i | 40               | 2             | 26,8             |
| Control | 298-17-1i | 40               | 2             | 23,1             |
| Control | 298-18-1i | 40               | 4             | 46,8             |
| Control | 308-17-1i | 40               | 4             | 47,3             |
| Control | 308-18-1i | 40               | 1             | 10,5             |
| Control | 308-18-2i | 40               | 4             | 25,4             |
| Control | 308-21-1i | 40               | 5             | 72,6             |

|            |           |    |   |       |
|------------|-----------|----|---|-------|
| Control    | 308-21-2i | 40 | 4 | 58,7  |
| CIMT       | 211-10-1i | 40 | 7 | 111,2 |
| CIMT       | 211-13-1i | 40 | 2 | 39,7  |
| CIMT       | 211-13-2i | 40 | 3 | 39,3  |
| CIMT       | 211-14-1i | 40 | 1 | 20,5  |
| CIMT       | 211-14-2i | 40 | 1 | 10,6  |
| CIMT       | 211-15-1i | 40 | 1 | 12,2  |
| CIMT       | 211-15-2i | 40 | 1 | 10,5  |
| CIMT       | 212-13-1i | 40 | 2 | 16,1  |
| CIMT       | 212-13-2i | 40 | 5 | 48    |
| CIMT       | 212-14-1i | 40 | 7 | 128   |
| CIMT       | 212-14-2i | 40 | 4 | 41,7  |
| CIMT       | 212-15-1i | 40 | 1 | 10,4  |
| CIMT       | 218-11-1i | 40 | 4 | 66,7  |
| CIMT       | 218-14-1i | 40 | 1 | 11,1  |
| CIMT       | 218-16-1i | 40 | 1 | 14,4  |
| CIMT       | 218-17-1i | 40 | 1 | 10,3  |
| CIMT       | 218-19-1i | 40 | 3 | 42,1  |
| CIMT       | 299-14-1i | 40 | 3 | 46,9  |
| CIMT       | 299-14-2i | 40 | 3 | 43,6  |
| CIMT       | 299-15-1i | 40 | 4 | 53,1  |
| CIMT       | 299-16-1i | 40 | 1 | 11,2  |
| CIMT       | 299-17-1i | 40 | 3 | 36,9  |
| CIMT       | 300-16-1i | 40 | 4 | 36,3  |
| CIMT       | 300-20-1i | 40 | 5 | 51,4  |
| CIMT       | 300-22-1i | 40 | 4 | 37,4  |
| CIMT       | 300-24-1i | 40 | 2 | 33,4  |
| CIMT       | 300-24-2i | 40 | 2 | 20,6  |
| CIMT       | 309-15-1i | 40 | 3 | 38,8  |
| CIMT       | 309-15-2i | 40 | 6 | 132,1 |
| CIMT       | 309-16-1i | 40 | 4 | 65,5  |
| CIMT       | 309-16-2i | 40 | 3 | 37,5  |
| CIMT       | 309-17-1i | 40 | 8 | 118,5 |
| CIMT+G-CSF | 213-12-1i | 40 | 5 | 54,7  |
| CIMT+G-CSF | 213-14-1i | 40 | 1 | 41,4  |
| CIMT+G-CSF | 213-17-1i | 40 | 2 | 50,9  |
| CIMT+G-CSF | 213-18-1i | 40 | 2 | 26,5  |
| CIMT+G-CSF | 213-8-1i  | 40 | 4 | 26    |
| CIMT+G-CSF | 214-14-1i | 40 | 3 | 40,7  |
| CIMT+G-CSF | 214-14-2i | 40 | 6 | 84,1  |
| CIMT+G-CSF | 214-17-1i | 40 | 3 | 27,5  |
| CIMT+G-CSF | 214-18-1i | 40 | 2 | 26,1  |
| CIMT+G-CSF | 214-19-1i | 40 | 1 | 13,2  |
| CIMT+G-CSF | 217-10-1i | 40 | 2 | 26,9  |
| CIMT+G-CSF | 217-16-1i | 40 | 2 | 22,9  |
| CIMT+G-CSF | 217-17-1i | 40 | 1 | 10,4  |
| CIMT+G-CSF | 217-6-1i  | 40 | 3 | 56    |
| CIMT+G-CSF | 217-8-1i  | 40 | 3 | 64    |
| CIMT+G-CSF | 304-17-1i | 40 | 1 | 10,7  |
| CIMT+G-CSF | 304-19-1i | 40 | 2 | 43,8  |
| CIMT+G-CSF | 304-19-2i | 40 | 2 | 18,3  |
| CIMT+G-CSF | 304-20-1i | 40 | 2 | 27,8  |
| CIMT+G-CSF | 304-21-1i | 40 | 2 | 13,9  |
| CIMT+G-CSF | 304-21-2i | 40 | 2 | 23,9  |
| CIMT+G-CSF | 304-22-1i | 40 | 2 | 19,1  |
| CIMT+G-CSF | 305-17-1i | 40 | 1 | 13,2  |

|                      |    |    |       |
|----------------------|----|----|-------|
| CIMT+G-CSF 305-17-2i | 40 | 1  | 13,5  |
| CIMT+G-CSF 305-18-1i | 40 | 2  | 33,3  |
| CIMT+G-CSF 305-19-1i | 40 | 2  | 40,2  |
| CIMT+G-CSF 305-19-2i | 40 | 1  | 17,1  |
| CIMT/G-CSF 306-17-1i | 40 | 1  | 12,9  |
| CIMT/G-CSF 306-17-2i | 40 | 2  | 65,2  |
| CIMT/G-CSF 306-18-1i | 40 | 3  | 47,7  |
| CIMT/G-CSF 306-18-2i | 40 | 2  | 32,1  |
| CIMT/G-CSF 306-18-3i | 40 | 2  | 29,1  |
| CIMT/G-CSF 311-16-1i | 40 | 3  | 47,8  |
| CIMT/G-CSF 311-17-1i | 40 | 2  | 12,5  |
| CIMT/G-CSF 311-17-2i | 40 | 2  | 24,1  |
| CIMT/G-CSF 311-18-1i | 40 | 3  | 61    |
| CIMT/G-CSF 311-19-1i | 40 | 4  | 106,6 |
| CIMT/G-CSF 313-14.1i | 40 | 2  | 21,9  |
| CIMT/G-CSF 313-15-1i | 40 | 2  | 22,7  |
| CIMT/G-CSF 313-17-1i | 40 | 2  | 14,6  |
| CIMT/G-CSF 313-19-1i | 40 | 2  | 32    |
| CIMT/G-CSF 313-19-2i | 40 | 3  | 37,2  |
| CIMT/G-CSF 314-16-1i | 40 | 3  | 38,4  |
| CIMT/G-CSF 314-16-2i | 40 | 6  | 95,1  |
| CIMT/G-CSF 314-17-1i | 40 | 2  | 31,8  |
| CIMT/G-CSF 314-17-2i | 40 | 2  | 33,2  |
| CIMT/G-CSF 314-18-1i | 40 | 3  | 60    |
| CIMT/G-CSF 315-11-1i | 40 | 3  | 41,5  |
| CIMT/G-CSF 315-11-2i | 40 | 1  | 65,2  |
| CIMT/G-CSF 315-13-1i | 40 | 2  | 19,2  |
| CIMT/G-CSF 315-13-2i | 40 | 2  | 26,6  |
| CIMT/G-CSF 315-14-1i | 40 | 5  | 116,5 |
| CIMT/G-CSF 315-14-2i | 40 | 4  | 45,4  |
| G-CSF 220-16-1i      | 40 | 5  | 71,7  |
| G-CSF 220-17-1i      | 40 | 1  | 13    |
| G-CSF 220-18-1i      | 40 | 1  | 11,2  |
| G-CSF 220-19-1i      | 40 | 3  | 61,4  |
| G-CSF 220-7-1i       | 40 | 2  | 40,5  |
| G-CSF 221-13-1i      | 40 | 1  | 10,7  |
| G-CSF 221-16-1i      | 40 | 3  | 36,4  |
| G-CSF 221-19-1i      | 40 | 2  | 14,6  |
| G-CSF 221-22-1i      | 40 | 2  | 23,9  |
| G-CSF 221-6-1i       | 40 | 1  | 10    |
| G-CSF 222-16-1i      | 40 | 2  | 25,7  |
| G-CSF 222-17-1i      | 40 | 1  | 10,2  |
| G-CSF 222-21-1i      | 40 | 2  | 29,6  |
| G-CSF 222-23-1i      | 40 | 6  | 67,5  |
| G-CSF 222-8-1i       | 40 | 1  | 10,4  |
| G-CSF 301-18-1i      | 40 | 12 | 155,3 |
| G-CSF 301-19-1i      | 40 | 2  | 21,5  |
| G-CSF 301-20-1i      | 40 | 2  | 23,7  |
| G-CSF 301-20-2i      | 40 | 2  | 35    |
| G-CSF 301-20-3i      | 40 | 3  | 64,1  |
| G-CSF 302-16-1i      | 40 | 1  | 10,2  |
| G-CSF 302-16-2i      | 40 | 2  | 44,1  |
| G-CSF 302-17-1i      | 40 | 1  | 10,4  |
| G-CSF 302-17-2i      | 40 | 1  | 10,5  |
| G-CSF 302-18-1i      | 40 | 2  | 47,8  |
| G-CSF 303-15-1i      | 40 | 3  | 27,7  |



|       |           |    |   |      |
|-------|-----------|----|---|------|
| G-CSF | 303-16-1i | 40 | 3 | 33   |
| G-CSF | 303-16-2i | 40 | 3 | 30,3 |
| G-CSF | 303-17-1i | 40 | 4 | 38,4 |
| G-CSF | 303-17-2i | 40 | 4 | 39,9 |

apical dendrite Sholl 50 $\mu$ m

| Group   | number    | Radius( $\mu$ m) | Intersections | Length( $\mu$ m) |
|---------|-----------|------------------|---------------|------------------|
| Control | 215-11-1i | 50               | 2             | 45,8             |
| Control | 215-15-1i | 50               | 2             | 27,6             |
| Control | 215-16-1i | 50               | 3             | 45,1             |
| Control | 215-18-1i | 50               | 2             | 44,8             |
| Control | 215-9-1i  | 50               | 4             | 53,3             |
| Control | 216-12-1i | 50               | 3             | 34,4             |
| Control | 216-18-1i | 50               | 1             | 11,8             |
| Control | 216-19-1i | 50               | 2             | 26,1             |
| Control | 216-22-1i | 50               | 2             | 24,4             |
| Control | 216-6-1i  | 50               | 7             | 107,4            |
| Control | 216-8-1i  | 50               | 6             | 123,6            |
| Control | 219-10-1i | 50               | 3             | 43,8             |
| Control | 219-14-1i | 50               | 1             | 10               |
| Control | 219-15-1i | 50               | 6             | 58,4             |
| Control | 219-17-1i | 50               | 1             | 47,8             |
| Control | 219-21-1i | 50               | 3             | 37,5             |
| Control | 297-19-1i | 50               | 3             | 31,5             |
| Control | 297-19-2i | 50               | 2             | 33,4             |
| Control | 297-20-1i | 50               | 2             | 22,5             |
| Control | 297-22-1i | 50               | 1             | 13,1             |
| Control | 297-22-2i | 50               | 4             | 56,6             |
| Control | 298-15-1i | 50               | 4             | 51,7             |
| Control | 298-15-2i | 50               | 9             | 80,9             |
| Control | 298-16-1i | 50               | 1             | 18,4             |
| Control | 298-17-1i | 50               | 5             | 48,5             |
| Control | 298-18-1i | 50               | 5             | 56,2             |
| Control | 308-17-1i | 50               | 4             | 53,6             |
| Control | 308-18-1i | 50               | 1             | 11               |
| Control | 308-18-2i | 50               | 4             | 82,7             |
| Control | 308-21-1i | 50               | 10            | 96,8             |
| Control | 308-21-2i | 50               | 4             | 45,2             |
| CIMT    | 211-10-1i | 50               | 6             | 147,7            |
| CIMT    | 211-13-1i | 50               | 4             | 33,5             |
| CIMT    | 211-13-2i | 50               | 3             | 33,6             |
| CIMT    | 211-14-1i | 50               | 1             | 10,1             |
| CIMT    | 211-14-2i | 50               | 1             | 10,4             |
| CIMT    | 211-15-1i | 50               | 1             | 11,6             |
| CIMT    | 211-15-2i | 50               | 3             | 57,5             |
| CIMT    | 212-13-1i | 50               | 3             | 43,4             |
| CIMT    | 212-13-2i | 50               | 5             | 77               |
| CIMT    | 212-14-1i | 50               | 6             | 106,6            |
| CIMT    | 212-14-2i | 50               | 4             | 65,1             |
| CIMT    | 212-15-1i | 50               | 4             | 42,5             |
| CIMT    | 218-11-1i | 50               | 4             | 45,9             |
| CIMT    | 218-14-1i | 50               | 1             | 10,5             |
| CIMT    | 218-16-1i | 50               | 1             | 11,4             |
| CIMT    | 218-17-1i | 50               | 1             | 10,2             |

|            |           |    |   |       |
|------------|-----------|----|---|-------|
| CIMT       | 218-19-1i | 50 | 4 | 51,7  |
| CIMT       | 299-14-1i | 50 | 4 | 81,2  |
| CIMT       | 299-14-2i | 50 | 4 | 55,7  |
| CIMT       | 299-15-1i | 50 | 5 | 78,9  |
| CIMT       | 299-16-1i | 50 | 3 | 49,9  |
| CIMT       | 299-17-1i | 50 | 2 | 58,2  |
| CIMT       | 300-16-1i | 50 | 5 | 68,9  |
| CIMT       | 300-20-1i | 50 | 4 | 56,9  |
| CIMT       | 300-22-1i | 50 | 5 | 97,6  |
| CIMT       | 300-24-1i | 50 | 3 | 28,4  |
| CIMT       | 300-24-2i | 50 | 2 | 21,1  |
| CIMT       | 309-15-1i | 50 | 3 | 39,9  |
| CIMT       | 309-15-2i | 50 | 4 | 63,3  |
| CIMT       | 309-16-1i | 50 | 5 | 77,2  |
| CIMT       | 309-16-2i | 50 | 3 | 38,2  |
| CIMT       | 309-17-1i | 50 | 8 | 103   |
| CIMT+G-CSF | 213-12-1i | 50 | 4 | 58,4  |
| CIMT+G-CSF | 213-14-1i | 50 | 2 | 19,9  |
| CIMT+G-CSF | 213-17-1i | 50 | 2 | 39,1  |
| CIMT+G-CSF | 213-18-1i | 50 | 2 | 27,7  |
| CIMT+G-CSF | 213-8-1i  | 50 | 3 | 55,9  |
| CIMT+G-CSF | 214-14-1i | 50 | 3 | 57,4  |
| CIMT+G-CSF | 214-14-2i | 50 | 5 | 130   |
| CIMT+G-CSF | 214-17-1i | 50 | 3 | 38,6  |
| CIMT+G-CSF | 214-18-1i | 50 | 3 | 41,7  |
| CIMT+G-CSF | 214-19-1i | 50 | 1 | 10,6  |
| CIMT+G-CSF | 217-10-1i | 50 | 5 | 104,5 |
| CIMT+G-CSF | 217-16-1i | 50 | 5 | 61    |
| CIMT+G-CSF | 217-17-1i | 50 | 2 | 28,3  |
| CIMT+G-CSF | 217-6-1i  | 50 | 5 | 73,8  |
| CIMT+G-CSF | 217-8-1i  | 50 | 7 | 139,8 |
| CIMT+G-CSF | 304-17-1i | 50 | 1 | 11,6  |
| CIMT+G-CSF | 304-19-1i | 50 | 1 | 14,4  |
| CIMT+G-CSF | 304-19-2i | 50 | 2 | 24,8  |
| CIMT+G-CSF | 304-20-1i | 50 | 2 | 25,6  |
| CIMT+G-CSF | 304-21-1i | 50 | 4 | 33,3  |
| CIMT+G-CSF | 304-21-2i | 50 | 2 | 30,8  |
| CIMT+G-CSF | 304-22-1i | 50 | 1 | 23,7  |
| CIMT+G-CSF | 305-17-1i | 50 | 1 | 17,2  |
| CIMT+G-CSF | 305-17-2i | 50 | 1 | 11,8  |
| CIMT+G-CSF | 305-18-1i | 50 | 3 | 38,4  |
| CIMT+G-CSF | 305-19-1i | 50 | 3 | 32,3  |
| CIMT+G-CSF | 305-19-2i | 50 | 2 | 59,7  |
| CIMT/G-CSF | 306-17-1i | 50 | 2 | 18,9  |
| CIMT/G-CSF | 306-17-2i | 50 | 3 | 73,6  |
| CIMT/G-CSF | 306-18-1i | 50 | 4 | 54,6  |
| CIMT/G-CSF | 306-18-2i | 50 | 2 | 37,9  |
| CIMT/G-CSF | 306-18-3i | 50 | 3 | 52,3  |
| CIMT/G-CSF | 311-16-1i | 50 | 1 | 36,2  |
| CIMT/G-CSF | 311-17-1i | 50 | 4 | 90,5  |
| CIMT/G-CSF | 311-17-2i | 50 | 2 | 21,7  |
| CIMT/G-CSF | 311-18-1i | 50 | 2 | 34,1  |
| CIMT/G-CSF | 311-19-1i | 50 | 6 | 71,1  |
| CIMT/G-CSF | 313-14.1i | 50 | 2 | 21,7  |
| CIMT/G-CSF | 313-15-1i | 50 | 2 | 21,5  |
| CIMT/G-CSF | 313-17-1i | 50 | 2 | 34,7  |

|            |           |    |    |       |
|------------|-----------|----|----|-------|
| CIMT/G-CSF | 313-19-1i | 50 | 3  | 31,1  |
| CIMT/G-CSF | 313-19-2i | 50 | 3  | 55,6  |
| CIMT/G-CSF | 314-16-1i | 50 | 3  | 36,6  |
| CIMT/G-CSF | 314-16-2i | 50 | 6  | 68    |
| CIMT/G-CSF | 314-17-1i | 50 | 2  | 28,2  |
| CIMT/G-CSF | 314-17-2i | 50 | 7  | 110,1 |
| CIMT/G-CSF | 314-18-1i | 50 | 4  | 85,9  |
| CIMT/G-CSF | 315-11-1i | 50 | 3  | 36,3  |
| CIMT/G-CSF | 315-11-2i | 50 | 1  | 11    |
| CIMT/G-CSF | 315-13-1i | 50 | 4  | 66,4  |
| CIMT/G-CSF | 315-13-2i | 50 | 3  | 42    |
| CIMT/G-CSF | 315-14-1i | 50 | 6  | 108,8 |
| CIMT/G-CSF | 315-14-2i | 50 | 5  | 57,4  |
| G-CSF      | 220-16-1i | 50 | 4  | 74,4  |
| G-CSF      | 220-17-1i | 50 | 2  | 40    |
| G-CSF      | 220-18-1i | 50 | 5  | 83,1  |
| G-CSF      | 220-19-1i | 50 | 2  | 42,7  |
| G-CSF      | 220-7-1i  | 50 | 2  | 22,1  |
| G-CSF      | 221-13-1i | 50 | 3  | 43,1  |
| G-CSF      | 221-16-1i | 50 | 3  | 47    |
| G-CSF      | 221-19-1i | 50 | 4  | 35,5  |
| G-CSF      | 221-22-1i | 50 | 2  | 48,3  |
| G-CSF      | 221-6-1i  | 50 | 2  | 18,5  |
| G-CSF      | 222-16-1i | 50 | 4  | 57,4  |
| G-CSF      | 222-17-1i | 50 | 2  | 18,7  |
| G-CSF      | 222-21-1i | 50 | 2  | 29,6  |
| G-CSF      | 222-23-1i | 50 | 4  | 82,3  |
| G-CSF      | 222-8-1i  | 50 | 2  | 20,8  |
| G-CSF      | 301-18-1i | 50 | 11 | 164,7 |
| G-CSF      | 301-19-1i | 50 | 2  | 29,7  |
| G-CSF      | 301-20-1i | 50 | 2  | 25    |
| G-CSF      | 301-20-2i | 50 | 2  | 28,6  |
| G-CSF      | 301-20-3i | 50 | 2  | 36,4  |
| G-CSF      | 302-16-1i | 50 | 1  | 10,3  |
| G-CSF      | 302-16-2i | 50 | 2  | 26,8  |
| G-CSF      | 302-17-1i | 50 | 3  | 37,3  |
| G-CSF      | 302-17-2i | 50 | 1  | 12,2  |
| G-CSF      | 302-18-1i | 50 | 1  | 26,3  |
| G-CSF      | 303-15-1i | 50 | 4  | 54,6  |
| G-CSF      | 303-16-1i | 50 | 3  | 58    |
| G-CSF      | 303-16-2i | 50 | 4  | 74,3  |
| G-CSF      | 303-17-1i | 50 | 4  | 62,2  |
| G-CSF      | 303-17-2i | 50 | 5  | 51,7  |

apical dendrite Sholl 60 $\mu$ m

| Group   | number    | Radius( $\mu$ m) | Intersections | Length( $\mu$ m) |
|---------|-----------|------------------|---------------|------------------|
| Control | 215-11-1i | 60               | 3             | 64,9             |
| Control | 215-15-1i | 60               | 2             | 24,2             |
| Control | 215-16-1i | 60               | 4             | 45,8             |
| Control | 215-18-1i | 60               | 3             | 33               |
| Control | 215-9-1i  | 60               | 4             | 53,6             |
| Control | 216-12-1i | 60               | 3             | 36,1             |
| Control | 216-18-1i | 60               | 1             | 10,4             |
| Control | 216-19-1i | 60               | 3             | 39,4             |

|            |           |    |   |       |
|------------|-----------|----|---|-------|
| Control    | 216-22-1i | 60 | 2 | 13,6  |
| Control    | 216-6-1i  | 60 | 5 | 86,2  |
| Control    | 216-8-1i  | 60 | 3 | 66,4  |
| Control    | 219-10-1i | 60 | 4 | 97,7  |
| Control    | 219-14-1i | 60 | 1 | 11,3  |
| Control    | 219-15-1i | 60 | 4 | 77,4  |
| Control    | 219-17-1i | 60 | 1 | 10,9  |
| Control    | 219-21-1i | 60 | 5 | 84,5  |
| Control    | 297-19-1i | 60 | 3 | 55,8  |
| Control    | 297-19-2i | 60 | 3 | 54,1  |
| Control    | 297-20-1i | 60 | 2 | 25,9  |
| Control    | 297-22-1i | 60 | 2 | 23,7  |
| Control    | 297-22-2i | 60 | 6 | 63    |
| Control    | 298-15-1i | 60 | 4 | 68,6  |
| Control    | 298-15-2i | 60 | 7 | 96,7  |
| Control    | 298-16-1i | 60 | 1 | 11,2  |
| Control    | 298-17-1i | 60 | 3 | 42,8  |
| Control    | 298-18-1i | 60 | 5 | 56,4  |
| Control    | 308-17-1i | 60 | 4 | 47,9  |
| Control    | 308-18-1i | 60 | 3 | 74,6  |
| Control    | 308-18-2i | 60 | 4 | 93,7  |
| Control    | 308-21-1i | 60 | 6 | 120,4 |
| Control    | 308-21-2i | 60 | 5 | 71,2  |
| CIMT       | 211-10-1i | 60 | 6 | 76    |
| CIMT       | 211-13-1i | 60 | 4 | 72,7  |
| CIMT       | 211-13-2i | 60 | 4 | 55,7  |
| CIMT       | 211-14-1i | 60 | 2 | 15,9  |
| CIMT       | 211-14-2i | 60 | 1 | 11,5  |
| CIMT       | 211-15-1i | 60 | 1 | 11,5  |
| CIMT       | 211-15-2i | 60 | 2 | 38,8  |
| CIMT       | 212-13-1i | 60 | 3 | 39,8  |
| CIMT       | 212-13-2i | 60 | 6 | 85,1  |
| CIMT       | 212-14-1i | 60 | 6 | 75,5  |
| CIMT       | 212-14-2i | 60 | 3 | 40    |
| CIMT       | 212-15-1i | 60 | 2 | 34,1  |
| CIMT       | 218-11-1i | 60 | 5 | 44,2  |
| CIMT       | 218-14-1i | 60 | 1 | 16,4  |
| CIMT       | 218-16-1i | 60 | 1 | 11,9  |
| CIMT       | 218-17-1i | 60 | 2 | 44,9  |
| CIMT       | 218-19-1i | 60 | 3 | 54,8  |
| CIMT       | 299-14-1i | 60 | 4 | 56,1  |
| CIMT       | 299-14-2i | 60 | 3 | 78,3  |
| CIMT       | 299-15-1i | 60 | 5 | 64,2  |
| CIMT       | 299-16-1i | 60 | 3 | 43,4  |
| CIMT       | 299-17-1i | 60 | 2 | 23,1  |
| CIMT       | 300-16-1i | 60 | 4 | 59,7  |
| CIMT       | 300-20-1i | 60 | 4 | 48,5  |
| CIMT       | 300-22-1i | 60 | 4 | 61,6  |
| CIMT       | 300-24-1i | 60 | 3 | 34,5  |
| CIMT       | 300-24-2i | 60 | 5 | 43    |
| CIMT       | 309-15-1i | 60 | 4 | 62,8  |
| CIMT       | 309-15-2i | 60 | 3 | 40,5  |
| CIMT       | 309-16-1i | 60 | 7 | 127,2 |
| CIMT       | 309-16-2i | 60 | 2 | 36,3  |
| CIMT       | 309-17-1i | 60 | 5 | 106,2 |
| CIMT+G-CSF | 213-12-1i | 60 | 5 | 96,5  |

|                      |    |   |       |
|----------------------|----|---|-------|
| CIMT+G-CSF 213-14-1i | 60 | 1 | 37,8  |
| CIMT+G-CSF 213-17-1i | 60 | 6 | 78    |
| CIMT+G-CSF 213-18-1i | 60 | 3 | 54,6  |
| CIMT+G-CSF 213-8-1i  | 60 | 5 | 92    |
| CIMT+G-CSF 214-14-1i | 60 | 1 | 37,5  |
| CIMT+G-CSF 214-14-2i | 60 | 3 | 81,8  |
| CIMT+G-CSF 214-17-1i | 60 | 3 | 33,4  |
| CIMT+G-CSF 214-18-1i | 60 | 4 | 45    |
| CIMT+G-CSF 214-19-1i | 60 | 1 | 10,7  |
| CIMT+G-CSF 217-10-1i | 60 | 5 | 69,9  |
| CIMT+G-CSF 217-16-1i | 60 | 3 | 43,5  |
| CIMT+G-CSF 217-17-1i | 60 | 3 | 39,8  |
| CIMT+G-CSF 217-6-1i  | 60 | 5 | 88,6  |
| CIMT+G-CSF 217-8-1i  | 60 | 6 | 84,5  |
| CIMT+G-CSF 304-17-1i | 60 | 0 | 8,8   |
| CIMT+G-CSF 304-19-1i | 60 | 2 | 26,1  |
| CIMT+G-CSF 304-19-2i | 60 | 3 | 28,1  |
| CIMT+G-CSF 304-20-1i | 60 | 2 | 23,8  |
| CIMT+G-CSF 304-21-1i | 60 | 4 | 54,9  |
| CIMT+G-CSF 304-21-2i | 60 | 1 | 18,3  |
| CIMT+G-CSF 304-22-1i | 60 | 1 | 10,4  |
| CIMT+G-CSF 305-17-1i | 60 | 1 | 10,9  |
| CIMT+G-CSF 305-17-2i | 60 | 1 | 10,4  |
| CIMT+G-CSF 305-18-1i | 60 | 3 | 27,3  |
| CIMT+G-CSF 305-19-1i | 60 | 3 | 66,2  |
| CIMT+G-CSF 305-19-2i | 60 | 4 | 54,7  |
| CIMT/G-CSF 306-17-1i | 60 | 2 | 59,5  |
| CIMT/G-CSF 306-17-2i | 60 | 3 | 55,1  |
| CIMT/G-CSF 306-18-1i | 60 | 4 | 52,5  |
| CIMT/G-CSF 306-18-2i | 60 | 2 | 26,7  |
| CIMT/G-CSF 306-18-3i | 60 | 3 | 43,4  |
| CIMT/G-CSF 311-16-1i | 60 | 5 | 50,9  |
| CIMT/G-CSF 311-17-1i | 60 | 4 | 148,4 |
| CIMT/G-CSF 311-17-2i | 60 | 3 | 31,2  |
| CIMT/G-CSF 311-18-1i | 60 | 1 | 18,7  |
| CIMT/G-CSF 311-19-1i | 60 | 6 | 74,8  |
| CIMT/G-CSF 313-14-1i | 60 | 2 | 22,3  |
| CIMT/G-CSF 313-15-1i | 60 | 2 | 40,7  |
| CIMT/G-CSF 313-17-1i | 60 | 3 | 46,2  |
| CIMT/G-CSF 313-19-1i | 60 | 3 | 38,7  |
| CIMT/G-CSF 313-19-2i | 60 | 3 | 36,6  |
| CIMT/G-CSF 314-16-1i | 60 | 4 | 38,8  |
| CIMT/G-CSF 314-16-2i | 60 | 8 | 109,5 |
| CIMT/G-CSF 314-17-1i | 60 | 1 | 46,9  |
| CIMT/G-CSF 314-17-2i | 60 | 4 | 78,8  |
| CIMT/G-CSF 314-18-1i | 60 | 5 | 74,6  |
| CIMT/G-CSF 315-11-1i | 60 | 2 | 28,6  |
| CIMT/G-CSF 315-11-2i | 60 | 1 | 11,3  |
| CIMT/G-CSF 315-13-1i | 60 | 7 | 75,5  |
| CIMT/G-CSF 315-13-2i | 60 | 2 | 32,1  |
| CIMT/G-CSF 315-14-1i | 60 | 5 | 112,1 |
| CIMT/G-CSF 315-14-2i | 60 | 6 | 84,9  |
| G-CSF 220-16-1i      | 60 | 6 | 91,9  |
| G-CSF 220-17-1i      | 60 | 4 | 50,7  |
| G-CSF 220-18-1i      | 60 | 4 | 76,3  |
| G-CSF 220-19-1i      | 60 | 2 | 24,7  |

|       |           |    |   |       |
|-------|-----------|----|---|-------|
| G-CSF | 220-7-1i  | 60 | 2 | 25,3  |
| G-CSF | 221-13-1i | 60 | 3 | 49,9  |
| G-CSF | 221-16-1i | 60 | 3 | 69,4  |
| G-CSF | 221-19-1i | 60 | 5 | 69,5  |
| G-CSF | 221-22-1i | 60 | 4 | 83,2  |
| G-CSF | 221-6-1i  | 60 | 2 | 23,8  |
| G-CSF | 222-16-1i | 60 | 4 | 65,3  |
| G-CSF | 222-17-1i | 60 | 2 | 29,8  |
| G-CSF | 222-21-1i | 60 | 2 | 25,8  |
| G-CSF | 222-23-1i | 60 | 3 | 50,8  |
| G-CSF | 222-8-1i  | 60 | 2 | 23,5  |
| G-CSF | 301-18-1i | 60 | 9 | 138,2 |
| G-CSF | 301-19-1i | 60 | 2 | 19,2  |
| G-CSF | 301-20-1i | 60 | 2 | 26,4  |
| G-CSF | 301-20-2i | 60 | 1 | 27,8  |
| G-CSF | 301-20-3i | 60 | 2 | 21    |
| G-CSF | 302-16-1i | 60 | 1 | 10,3  |
| G-CSF | 302-16-2i | 60 | 3 | 27,3  |
| G-CSF | 302-17-1i | 60 | 3 | 43,5  |
| G-CSF | 302-17-2i | 60 | 1 | 13,5  |
| G-CSF | 302-18-1i | 60 | 1 | 14,2  |
| G-CSF | 303-15-1i | 60 | 4 | 54    |
| G-CSF | 303-16-1i | 60 | 6 | 61,1  |
| G-CSF | 303-16-2i | 60 | 5 | 72,9  |
| G-CSF | 303-17-1i | 60 | 3 | 39,4  |
| G-CSF | 303-17-2i | 60 | 5 | 96,5  |

apical dendrite Sholl 70 $\mu$ m

| Group   | number    | Radius( $\mu$ m) | Intersections | Length( $\mu$ m) |
|---------|-----------|------------------|---------------|------------------|
| Control | 215-11-1i | 70               | 2             | 55,4             |
| Control | 215-15-1i | 70               | 2             | 21,5             |
| Control | 215-16-1i | 70               | 4             | 67,4             |
| Control | 215-18-1i | 70               | 4             | 36,4             |
| Control | 215-9-1i  | 70               | 3             | 48,8             |
| Control | 216-12-1i | 70               | 4             | 40,8             |
| Control | 216-18-1i | 70               | 1             | 10,3             |
| Control | 216-19-1i | 70               | 3             | 34,9             |
| Control | 216-22-1i | 70               | 3             | 73,5             |
| Control | 216-6-1i  | 70               | 4             | 111,2            |
| Control | 216-8-1i  | 70               | 4             | 80,1             |
| Control | 219-10-1i | 70               | 5             | 73,3             |
| Control | 219-14-1i | 70               | 1             | 66,6             |
| Control | 219-15-1i | 70               | 3             | 40,6             |
| Control | 219-17-1i | 70               | 1             | 20,3             |
| Control | 219-21-1i | 70               | 7             | 114,7            |
| Control | 297-19-1i | 70               | 3             | 34,6             |
| Control | 297-19-2i | 70               | 4             | 35,3             |
| Control | 297-20-1i | 70               | 2             | 27,9             |
| Control | 297-22-1i | 70               | 1             | 27,5             |
| Control | 297-22-2i | 70               | 10            | 170              |
| Control | 298-15-1i | 70               | 5             | 77,2             |
| Control | 298-15-2i | 70               | 7             | 84,5             |
| Control | 298-16-1i | 70               | 2             | 14               |
| Control | 298-17-1i | 70               | 4             | 54,8             |

|            |           |    |   |       |
|------------|-----------|----|---|-------|
| Control    | 298-18-1i | 70 | 6 | 61,3  |
| Control    | 308-17-1i | 70 | 4 | 55,9  |
| Control    | 308-18-1i | 70 | 3 | 40,8  |
| Control    | 308-18-2i | 70 | 5 | 82,4  |
| Control    | 308-21-1i | 70 | 6 | 93    |
| Control    | 308-21-2i | 70 | 5 | 119,7 |
| CIMT       | 211-10-1i | 70 | 5 | 79,7  |
| CIMT       | 211-13-1i | 70 | 2 | 85,8  |
| CIMT       | 211-13-2i | 70 | 4 | 46,8  |
| CIMT       | 211-14-1i | 70 | 1 | 23,2  |
| CIMT       | 211-14-2i | 70 | 1 | 10,9  |
| CIMT       | 211-15-1i | 70 | 1 | 10,4  |
| CIMT       | 211-15-2i | 70 | 2 | 24,3  |
| CIMT       | 212-13-1i | 70 | 4 | 41,9  |
| CIMT       | 212-13-2i | 70 | 5 | 133,4 |
| CIMT       | 212-14-1i | 70 | 3 | 55,6  |
| CIMT       | 212-14-2i | 70 | 2 | 29,9  |
| CIMT       | 212-15-1i | 70 | 2 | 22,4  |
| CIMT       | 218-11-1i | 70 | 3 | 59,4  |
| CIMT       | 218-14-1i | 70 | 2 | 28,1  |
| CIMT       | 218-16-1i | 70 | 1 | 10,6  |
| CIMT       | 218-17-1i | 70 | 5 | 107,8 |
| CIMT       | 218-19-1i | 70 | 3 | 45,9  |
| CIMT       | 299-14-1i | 70 | 4 | 44    |
| CIMT       | 299-14-2i | 70 | 2 | 31,3  |
| CIMT       | 299-15-1i | 70 | 6 | 71,5  |
| CIMT       | 299-16-1i | 70 | 5 | 67,8  |
| CIMT       | 299-17-1i | 70 | 2 | 37,1  |
| CIMT       | 300-16-1i | 70 | 3 | 47    |
| CIMT       | 300-20-1i | 70 | 4 | 43,7  |
| CIMT       | 300-22-1i | 70 | 3 | 40,6  |
| CIMT       | 300-24-1i | 70 | 3 | 35,6  |
| CIMT       | 300-24-2i | 70 | 5 | 73    |
| CIMT       | 309-15-1i | 70 | 4 | 55,5  |
| CIMT       | 309-15-2i | 70 | 3 | 44,9  |
| CIMT       | 309-16-1i | 70 | 3 | 56,9  |
| CIMT       | 309-16-2i | 70 | 4 | 40,6  |
| CIMT       | 309-17-1i | 70 | 5 | 72,1  |
| CIMT+G-CSF | 213-12-1i | 70 | 4 | 50,9  |
| CIMT+G-CSF | 213-14-1i | 70 | 1 | 10,4  |
| CIMT+G-CSF | 213-17-1i | 70 | 7 | 115,5 |
| CIMT+G-CSF | 213-18-1i | 70 | 4 | 82,7  |
| CIMT+G-CSF | 213-8-1i  | 70 | 3 | 77,8  |
| CIMT+G-CSF | 214-14-1i | 70 | 1 | 10,5  |
| CIMT+G-CSF | 214-14-2i | 70 | 1 | 18,1  |
| CIMT+G-CSF | 214-17-1i | 70 | 4 | 48,7  |
| CIMT+G-CSF | 214-18-1i | 70 | 4 | 48,4  |
| CIMT+G-CSF | 214-19-1i | 70 | 2 | 40,2  |
| CIMT+G-CSF | 217-10-1i | 70 | 4 | 53,8  |
| CIMT+G-CSF | 217-16-1i | 70 | 3 | 48    |
| CIMT+G-CSF | 217-17-1i | 70 | 4 | 40,5  |
| CIMT+G-CSF | 217-6-1i  | 70 | 5 | 77,2  |
| CIMT+G-CSF | 217-8-1i  | 70 | 5 | 88,6  |
| CIMT+G-CSF | 304-19-1i | 70 | 2 | 27,4  |
| CIMT+G-CSF | 304-19-2i | 70 | 3 | 36,1  |
| CIMT+G-CSF | 304-20-1i | 70 | 1 | 19    |

|                      |    |   |       |
|----------------------|----|---|-------|
| CIMT+G-CSF 304-21-1i | 70 | 4 | 47    |
| CIMT+G-CSF 304-21-2i | 70 | 1 | 10,5  |
| CIMT+G-CSF 304-22-1i | 70 | 1 | 10,5  |
| CIMT+G-CSF 305-17-1i | 70 | 3 | 42,3  |
| CIMT+G-CSF 305-17-2i | 70 | 1 | 10,2  |
| CIMT+G-CSF 305-18-1i | 70 | 1 | 51,3  |
| CIMT+G-CSF 305-19-1i | 70 | 3 | 45,1  |
| CIMT+G-CSF 305-19-2i | 70 | 5 | 85,7  |
| CIMT/G-CSF 306-17-1i | 70 | 2 | 25,3  |
| CIMT/G-CSF 306-17-2i | 70 | 3 | 62,2  |
| CIMT/G-CSF 306-18-1i | 70 | 3 | 53,3  |
| CIMT/G-CSF 306-18-2i | 70 | 2 | 26,1  |
| CIMT/G-CSF 306-18-3i | 70 | 2 | 30,1  |
| CIMT/G-CSF 311-16-1i | 70 | 4 | 90,6  |
| CIMT/G-CSF 311-17-1i | 70 | 5 | 68,3  |
| CIMT/G-CSF 311-17-2i | 70 | 4 | 69,3  |
| CIMT/G-CSF 311-18-1i | 70 | 1 | 10,2  |
| CIMT/G-CSF 311-19-1i | 70 | 9 | 110,1 |
| CIMT/G-CSF 313-14-1i | 70 | 2 | 22,1  |
| CIMT/G-CSF 313-15-1i | 70 | 2 | 23,5  |
| CIMT/G-CSF 313-17-1i | 70 | 2 | 44,4  |
| CIMT/G-CSF 313-19-1i | 70 | 3 | 36,5  |
| CIMT/G-CSF 313-19-2i | 70 | 3 | 61,2  |
| CIMT/G-CSF 314-16-1i | 70 | 4 | 50,5  |
| CIMT/G-CSF 314-16-2i | 70 | 7 | 112,2 |
| CIMT/G-CSF 314-17-1i | 70 | 1 | 12    |
| CIMT/G-CSF 314-17-2i | 70 | 6 | 144,2 |
| CIMT/G-CSF 314-18-1i | 70 | 3 | 73,2  |
| CIMT/G-CSF 315-11-1i | 70 | 3 | 33    |
| CIMT/G-CSF 315-11-2i | 70 | 1 | 13    |
| CIMT/G-CSF 315-13-1i | 70 | 4 | 109,5 |
| CIMT/G-CSF 315-13-2i | 70 | 2 | 24,4  |
| CIMT/G-CSF 315-14-1i | 70 | 5 | 84,4  |
| CIMT/G-CSF 315-14-2i | 70 | 4 | 69,4  |
| G-CSF 220-16-1i      | 70 | 5 | 69,6  |
| G-CSF 220-17-1i      | 70 | 3 | 45,2  |
| G-CSF 220-18-1i      | 70 | 7 | 68    |
| G-CSF 220-19-1i      | 70 | 2 | 27    |
| G-CSF 220-7-1i       | 70 | 2 | 22    |
| G-CSF 221-13-1i      | 70 | 4 | 53,1  |
| G-CSF 221-16-1i      | 70 | 4 | 69,7  |
| G-CSF 221-19-1i      | 70 | 9 | 91,4  |
| G-CSF 221-22-1i      | 70 | 2 | 34,3  |
| G-CSF 221-6-1i       | 70 | 2 | 23,3  |
| G-CSF 222-16-1i      | 70 | 5 | 55,7  |
| G-CSF 222-17-1i      | 70 | 2 | 51,9  |
| G-CSF 222-21-1i      | 70 | 2 | 22,5  |
| G-CSF 222-23-1i      | 70 | 4 | 55,8  |
| G-CSF 222-8-1i       | 70 | 2 | 25,4  |
| G-CSF 301-18-1i      | 70 | 8 | 106,7 |
| G-CSF 301-19-1i      | 70 | 3 | 57,7  |
| G-CSF 301-20-1i      | 70 | 2 | 32,9  |
| G-CSF 301-20-2i      | 70 | 1 | 10,7  |
| G-CSF 301-20-3i      | 70 | 3 | 41,4  |
| G-CSF 302-16-1i      | 70 | 1 | 11,5  |
| G-CSF 302-16-2i      | 70 | 2 | 28,2  |



|       |           |    |   |      |
|-------|-----------|----|---|------|
| G-CSF | 302-17-1i | 70 | 1 | 27   |
| G-CSF | 302-17-2i | 70 | 1 | 11,1 |
| G-CSF | 302-18-1i | 70 | 1 | 10,6 |
| G-CSF | 303-15-1i | 70 | 4 | 52,4 |
| G-CSF | 303-16-1i | 70 | 5 | 93,5 |
| G-CSF | 303-16-2i | 70 | 4 | 101  |
| G-CSF | 303-17-1i | 70 | 3 | 36,8 |
| G-CSF | 303-17-2i | 70 | 4 | 63,9 |

apical dendrite Sholl 80 $\mu$ m

| Group   | number    | Radius( $\mu$ m) | Intersections | Length( $\mu$ m) |
|---------|-----------|------------------|---------------|------------------|
| Control | 215-11-1i | 80               | 2             | 28,6             |
| Control | 215-15-1i | 80               | 2             | 21               |
| Control | 215-16-1i | 80               | 3             | 52,9             |
| Control | 215-18-1i | 80               | 4             | 54,6             |
| Control | 215-9-1i  | 80               | 2             | 34               |
| Control | 216-12-1i | 80               | 3             | 43,7             |
| Control | 216-18-1i | 80               | 1             | 16,7             |
| Control | 216-19-1i | 80               | 2             | 33               |
| Control | 216-22-1i | 80               | 2             | 31,8             |
| Control | 216-6-1i  | 80               | 3             | 45,4             |
| Control | 216-8-1i  | 80               | 6             | 105,8            |
| Control | 219-10-1i | 80               | 4             | 72,1             |
| Control | 219-14-1i | 80               | 1             | 10,5             |
| Control | 219-15-1i | 80               | 2             | 34,7             |
| Control | 219-17-1i | 80               | 3             | 14,2             |
| Control | 219-21-1i | 80               | 7             | 126,8            |
| Control | 297-19-1i | 80               | 3             | 36,6             |
| Control | 297-19-2i | 80               | 2             | 68,4             |
| Control | 297-20-1i | 80               | 3             | 35,1             |
| Control | 297-22-1i | 80               | 2             | 26,7             |
| Control | 297-22-2i | 80               | 11            | 143,5            |
| Control | 298-15-1i | 80               | 3             | 58,7             |
| Control | 298-15-2i | 80               | 8             | 98,2             |
| Control | 298-16-1i | 80               | 4             | 49,8             |
| Control | 298-17-1i | 80               | 6             | 56,7             |
| Control | 298-18-1i | 80               | 5             | 57,9             |
| Control | 308-17-1i | 80               | 5             | 80,1             |
| Control | 308-18-1i | 80               | 3             | 42,7             |
| Control | 308-18-2i | 80               | 5             | 77,4             |
| Control | 308-21-1i | 80               | 5             | 70               |
| Control | 308-21-2i | 80               | 4             | 74,9             |
| CIMT    | 211-10-1i | 80               | 5             | 58,2             |
| CIMT    | 211-13-1i | 80               | 2             | 35,3             |
| CIMT    | 211-13-2i | 80               | 2             | 31,7             |
| CIMT    | 211-14-1i | 80               | 1             | 11               |
| CIMT    | 211-14-2i | 80               | 1             | 12,7             |
| CIMT    | 211-15-1i | 80               | 1             | 11               |
| CIMT    | 211-15-2i | 80               | 4             | 76,3             |
| CIMT    | 212-13-1i | 80               | 4             | 81,3             |
| CIMT    | 212-13-2i | 80               | 4             | 70,5             |
| CIMT    | 212-14-1i | 80               | 4             | 52,4             |
| CIMT    | 212-14-2i | 80               | 3             | 38,5             |
| CIMT    | 212-15-1i | 80               | 1             | 52,3             |

|            |           |    |   |       |
|------------|-----------|----|---|-------|
| CIMT       | 218-11-1i | 80 | 2 | 31,4  |
| CIMT       | 218-14-1i | 80 | 4 | 93,6  |
| CIMT       | 218-16-1i | 80 | 1 | 10,4  |
| CIMT       | 218-17-1i | 80 | 5 | 74,3  |
| CIMT       | 218-19-1i | 80 | 2 | 31,9  |
| CIMT       | 299-14-1i | 80 | 4 | 54,1  |
| CIMT       | 299-14-2i | 80 | 3 | 55,5  |
| CIMT       | 299-15-1i | 80 | 6 | 72,7  |
| CIMT       | 299-16-1i | 80 | 5 | 75,7  |
| CIMT       | 299-17-1i | 80 | 2 | 25,7  |
| CIMT       | 300-16-1i | 80 | 2 | 23,4  |
| CIMT       | 300-20-1i | 80 | 2 | 25,6  |
| CIMT       | 300-22-1i | 80 | 3 | 36,5  |
| CIMT       | 300-24-1i | 80 | 4 | 88,2  |
| CIMT       | 300-24-2i | 80 | 5 | 78,8  |
| CIMT       | 309-15-1i | 80 | 5 | 67,8  |
| CIMT       | 309-15-2i | 80 | 2 | 49,5  |
| CIMT       | 309-16-1i | 80 | 5 | 110,4 |
| CIMT       | 309-16-2i | 80 | 5 | 92,7  |
| CIMT       | 309-17-1i | 80 | 5 | 61,5  |
| CIMT+G-CSF | 213-12-1i | 80 | 4 | 53,7  |
| CIMT+G-CSF | 213-14-1i | 80 | 2 | 12,7  |
| CIMT+G-CSF | 213-17-1i | 80 | 5 | 92,7  |
| CIMT+G-CSF | 213-18-1i | 80 | 4 | 65,4  |
| CIMT+G-CSF | 213-8-1i  | 80 | 6 | 94,9  |
| CIMT+G-CSF | 214-14-1i | 80 | 2 | 27,6  |
| CIMT+G-CSF | 214-14-2i | 80 | 2 | 52,3  |
| CIMT+G-CSF | 214-17-1i | 80 | 3 | 36,6  |
| CIMT+G-CSF | 214-18-1i | 80 | 4 | 55,3  |
| CIMT+G-CSF | 214-19-1i | 80 | 2 | 40    |
| CIMT+G-CSF | 217-10-1i | 80 | 6 | 96,6  |
| CIMT+G-CSF | 217-16-1i | 80 | 3 | 63,6  |
| CIMT+G-CSF | 217-17-1i | 80 | 4 | 51,9  |
| CIMT+G-CSF | 217-6-1i  | 80 | 6 | 89,3  |
| CIMT+G-CSF | 217-8-1i  | 80 | 7 | 103,1 |
| CIMT+G-CSF | 304-19-1i | 80 | 2 | 44,4  |
| CIMT+G-CSF | 304-19-2i | 80 | 3 | 34,5  |
| CIMT+G-CSF | 304-20-1i | 80 | 0 | 1,3   |
| CIMT+G-CSF | 304-21-1i | 80 | 4 | 70,2  |
| CIMT+G-CSF | 304-21-2i | 80 | 0 | 0,2   |
| CIMT+G-CSF | 304-22-1i | 80 | 1 | 15,1  |
| CIMT+G-CSF | 305-17-1i | 80 | 2 | 59,5  |
| CIMT+G-CSF | 305-17-2i | 80 | 4 | 62,6  |
| CIMT+G-CSF | 305-18-1i | 80 | 1 | 10,5  |
| CIMT+G-CSF | 305-19-1i | 80 | 3 | 54,3  |
| CIMT+G-CSF | 305-19-2i | 80 | 4 | 73,6  |
| CIMT/G-CSF | 306-17-1i | 80 | 3 | 43,8  |
| CIMT/G-CSF | 306-17-2i | 80 | 2 | 79,9  |
| CIMT/G-CSF | 306-18-1i | 80 | 5 | 87,7  |
| CIMT/G-CSF | 306-18-2i | 80 | 2 | 27    |
| CIMT/G-CSF | 306-18-3i | 80 | 1 | 11,8  |
| CIMT/G-CSF | 311-16-1i | 80 | 3 | 74,3  |
| CIMT/G-CSF | 311-17-1i | 80 | 4 | 77,4  |
| CIMT/G-CSF | 311-17-2i | 80 | 6 | 90,2  |
| CIMT/G-CSF | 311-18-1i | 80 | 1 | 10,4  |
| CIMT/G-CSF | 311-19-1i | 80 | 9 | 151,8 |

|            |           |    |    |       |
|------------|-----------|----|----|-------|
| CIMT/G-CSF | 313-14-1i | 80 | 2  | 23,4  |
| CIMT/G-CSF | 313-15-1i | 80 | 1  | 21,1  |
| CIMT/G-CSF | 313-17-1i | 80 | 2  | 27,8  |
| CIMT/G-CSF | 313-19-1i | 80 | 2  | 27,6  |
| CIMT/G-CSF | 313-19-2i | 80 | 2  | 44,4  |
| CIMT/G-CSF | 314-16-1i | 80 | 2  | 46,5  |
| CIMT/G-CSF | 314-16-2i | 80 | 5  | 84,2  |
| CIMT/G-CSF | 314-17-1i | 80 | 1  | 13,8  |
| CIMT/G-CSF | 314-17-2i | 80 | 4  | 64,4  |
| CIMT/G-CSF | 314-18-1i | 80 | 2  | 25,3  |
| CIMT/G-CSF | 315-11-1i | 80 | 3  | 46,9  |
| CIMT/G-CSF | 315-11-2i | 80 | 1  | 12,4  |
| CIMT/G-CSF | 315-13-1i | 80 | 4  | 53    |
| CIMT/G-CSF | 315-13-2i | 80 | 1  | 13,7  |
| CIMT/G-CSF | 315-14-1i | 80 | 4  | 63,1  |
| CIMT/G-CSF | 315-14-2i | 80 | 5  | 64,9  |
| G-CSF      | 220-16-1i | 80 | 2  | 37,2  |
| G-CSF      | 220-17-1i | 80 | 3  | 30,9  |
| G-CSF      | 220-18-1i | 80 | 6  | 137,7 |
| G-CSF      | 220-19-1i | 80 | 3  | 38    |
| G-CSF      | 220-7-1i  | 80 | 2  | 22,5  |
| G-CSF      | 221-13-1i | 80 | 4  | 57    |
| G-CSF      | 221-16-1i | 80 | 11 | 121,2 |
| G-CSF      | 221-19-1i | 80 | 8  | 108,4 |
| G-CSF      | 221-22-1i | 80 | 3  | 38,6  |
| G-CSF      | 221-6-1i  | 80 | 3  | 34,1  |
| G-CSF      | 222-16-1i | 80 | 6  | 65,1  |
| G-CSF      | 222-17-1i | 80 | 2  | 26,6  |
| G-CSF      | 222-21-1i | 80 | 7  | 108,7 |
| G-CSF      | 222-23-1i | 80 | 4  | 53,1  |
| G-CSF      | 222-8-1i  | 80 | 4  | 46,3  |
| G-CSF      | 301-18-1i | 80 | 7  | 163,1 |
| G-CSF      | 301-19-1i | 80 | 3  | 44,1  |
| G-CSF      | 301-20-1i | 80 | 2  | 26,2  |
| G-CSF      | 301-20-2i | 80 | 1  | 10,1  |
| G-CSF      | 301-20-3i | 80 | 3  | 40    |
| G-CSF      | 302-16-1i | 80 | 1  | 12    |
| G-CSF      | 302-16-2i | 80 | 2  | 21,4  |
| G-CSF      | 302-17-1i | 80 | 1  | 10,4  |
| G-CSF      | 302-17-2i | 80 | 1  | 12,6  |
| G-CSF      | 302-18-1i | 80 | 1  | 13,3  |
| G-CSF      | 303-15-1i | 80 | 4  | 47,8  |
| G-CSF      | 303-16-1i | 80 | 6  | 73,2  |
| G-CSF      | 303-16-2i | 80 | 3  | 45,6  |
| G-CSF      | 303-17-1i | 80 | 2  | 26,9  |
| G-CSF      | 303-17-2i | 80 | 4  | 61,9  |

apical dendrite Sholl 90 $\mu$ m

| Group   | number    | Radius( $\mu$ m) | Intersections | Length( $\mu$ m) |
|---------|-----------|------------------|---------------|------------------|
| Control | 215-11-1i | 90               | 3             | 69,9             |
| Control | 215-15-1i | 90               | 2             | 24,9             |
| Control | 215-16-1i | 90               | 3             | 34,1             |
| Control | 215-18-1i | 90               | 5             | 61,1             |
| Control | 215-9-1i  | 90               | 4             | 52,3             |

|         |           |    |   |       |
|---------|-----------|----|---|-------|
| Control | 216-12-1i | 90 | 2 | 22,5  |
| Control | 216-18-1i | 90 | 2 | 28,3  |
| Control | 216-19-1i | 90 | 1 | 24,2  |
| Control | 216-22-1i | 90 | 2 | 21,7  |
| Control | 216-6-1i  | 90 | 3 | 33    |
| Control | 216-8-1i  | 90 | 5 | 88,2  |
| Control | 219-10-1i | 90 | 1 | 20,5  |
| Control | 219-14-1i | 90 | 5 | 89    |
| Control | 219-15-1i | 90 | 3 | 26,2  |
| Control | 219-17-1i | 90 | 1 | 19,9  |
| Control | 219-21-1i | 90 | 2 | 27,8  |
| Control | 297-19-1i | 90 | 3 | 37,7  |
| Control | 297-19-2i | 90 | 3 | 56,9  |
| Control | 297-20-1i | 90 | 3 | 70,1  |
| Control | 297-22-1i | 90 | 4 | 65,4  |
| Control | 297-22-2i | 90 | 2 | 28,8  |
| Control | 298-15-1i | 90 | 9 | 179,1 |
| Control | 298-15-2i | 90 | 3 | 44,6  |
| Control | 298-16-1i | 90 | 6 | 101   |
| Control | 298-17-1i | 90 | 3 | 100,5 |
| Control | 298-18-1i | 90 | 8 | 107,3 |
| Control | 308-17-1i | 90 | 1 | 11,3  |
| Control | 308-18-1i | 90 | 5 | 70,9  |
| Control | 308-18-2i | 90 | 4 | 59,3  |
| Control | 308-21-1i | 90 | 8 | 74,8  |
| Control | 308-21-2i | 90 | 3 | 70    |
| CIMT    | 211-10-1i | 90 | 3 | 79,8  |
| CIMT    | 211-13-1i | 90 | 3 | 79,8  |
| CIMT    | 211-13-2i | 90 | 3 | 33,4  |
| CIMT    | 211-14-1i | 90 | 1 | 12,7  |
| CIMT    | 211-14-2i | 90 | 1 | 10,2  |
| CIMT    | 211-15-1i | 90 | 3 | 22,9  |
| CIMT    | 211-15-2i | 90 | 1 | 12,8  |
| CIMT    | 212-13-1i | 90 | 2 | 50,7  |
| CIMT    | 212-13-2i | 90 | 3 | 57    |
| CIMT    | 212-14-1i | 90 | 3 | 59,4  |
| CIMT    | 212-14-2i | 90 | 3 | 36,8  |
| CIMT    | 212-15-1i | 90 | 3 | 35,7  |
| CIMT    | 218-11-1i | 90 | 5 | 102,4 |
| CIMT    | 218-14-1i | 90 | 2 | 32,2  |
| CIMT    | 218-16-1i | 90 | 5 | 65,3  |
| CIMT    | 218-17-1i | 90 | 1 | 12,6  |
| CIMT    | 218-19-1i | 90 | 4 | 53,7  |
| CIMT    | 299-14-1i | 90 | 5 | 59,9  |
| CIMT    | 299-14-2i | 90 | 3 | 37,2  |
| CIMT    | 299-15-1i | 90 | 1 | 14,5  |
| CIMT    | 299-16-1i | 90 | 4 | 56,2  |
| CIMT    | 299-17-1i | 90 | 4 | 65,3  |
| CIMT    | 300-16-1i | 90 | 2 | 31,3  |
| CIMT    | 300-20-1i | 90 | 1 | 34    |
| CIMT    | 300-22-1i | 90 | 5 | 60,1  |
| CIMT    | 300-24-1i | 90 | 3 | 31,2  |
| CIMT    | 300-24-2i | 90 | 6 | 73,4  |
| CIMT    | 309-15-1i | 90 | 3 | 46,7  |
| CIMT    | 309-15-2i | 90 | 5 | 61,5  |
| CIMT    | 309-16-1i | 90 | 4 | 60,3  |

|            |           |    |   |       |
|------------|-----------|----|---|-------|
| CIMT       | 309-16-2i | 90 | 3 | 67,5  |
| CIMT       | 309-17-1i | 90 | 5 | 75,6  |
| CIMT+G-CSF | 213-12-1i | 90 | 2 | 20,2  |
| CIMT+G-CSF | 213-14-1i | 90 | 3 | 53,3  |
| CIMT+G-CSF | 213-17-1i | 90 | 2 | 22,4  |
| CIMT+G-CSF | 213-18-1i | 90 | 4 | 106,7 |
| CIMT+G-CSF | 213-8-1i  | 90 | 2 | 24,6  |
| CIMT+G-CSF | 214-14-1i | 90 | 2 | 69,4  |
| CIMT+G-CSF | 214-14-2i | 90 | 2 | 23,2  |
| CIMT+G-CSF | 214-17-1i | 90 | 3 | 25    |
| CIMT+G-CSF | 214-18-1i | 90 | 3 | 33,6  |
| CIMT+G-CSF | 214-19-1i | 90 | 4 | 49,1  |
| CIMT+G-CSF | 217-10-1i | 90 | 6 | 138,2 |
| CIMT+G-CSF | 217-16-1i | 90 | 4 | 111,1 |
| CIMT+G-CSF | 217-17-1i | 90 | 4 | 59,6  |
| CIMT+G-CSF | 217-6-1i  | 90 | 7 | 111,9 |
| CIMT+G-CSF | 217-8-1i  | 90 | 7 | 77,4  |
| CIMT+G-CSF | 304-19-1i | 90 | 3 | 39,4  |
| CIMT+G-CSF | 304-19-2i | 90 | 2 | 25,9  |
| CIMT+G-CSF | 304-21-1i | 90 | 3 | 40,7  |
| CIMT+G-CSF | 304-22-1i | 90 | 2 | 77,3  |
| CIMT+G-CSF | 305-17-1i | 90 | 1 | 11,2  |
| CIMT+G-CSF | 305-17-2i | 90 | 2 | 24,4  |
| CIMT+G-CSF | 305-18-1i | 90 | 3 | 87,5  |
| CIMT+G-CSF | 305-19-1i | 90 | 1 | 10,2  |
| CIMT+G-CSF | 305-19-2i | 90 | 2 | 23,7  |
| CIMT/G-CSF | 306-17-1i | 90 | 4 | 52,3  |
| CIMT/G-CSF | 306-17-2i | 90 | 2 | 33    |
| CIMT/G-CSF | 306-18-1i | 90 | 1 | 23,1  |
| CIMT/G-CSF | 306-18-2i | 90 | 5 | 66,2  |
| CIMT/G-CSF | 306-18-3i | 90 | 1 | 20,7  |
| CIMT/G-CSF | 311-16-1i | 90 | 5 | 66,4  |
| CIMT/G-CSF | 311-17-1i | 90 | 2 | 33,2  |
| CIMT/G-CSF | 311-17-2i | 90 | 6 | 115,3 |
| CIMT/G-CSF | 311-18-1i | 90 | 6 | 62,3  |
| CIMT/G-CSF | 311-19-1i | 90 | 2 | 19,3  |
| CIMT/G-CSF | 313-14.1i | 90 | 9 | 129   |
| CIMT/G-CSF | 313-15-1i | 90 | 2 | 27,4  |
| CIMT/G-CSF | 313-17-1i | 90 | 1 | 10,7  |
| CIMT/G-CSF | 313-19-1i | 90 | 2 | 25,3  |
| CIMT/G-CSF | 313-19-2i | 90 | 1 | 21,7  |
| CIMT/G-CSF | 314-16-1i | 90 | 3 | 26,3  |
| CIMT/G-CSF | 314-16-2i | 90 | 2 | 23    |
| CIMT/G-CSF | 314-17-1i | 90 | 5 | 76    |
| CIMT/G-CSF | 314-17-2i | 90 | 1 | 10,7  |
| CIMT/G-CSF | 314-18-1i | 90 | 2 | 23    |
| CIMT/G-CSF | 315-11-1i | 90 | 2 | 26,3  |
| CIMT/G-CSF | 315-11-2i | 90 | 1 | 27,3  |
| CIMT/G-CSF | 315-13-1i | 90 | 1 | 14,1  |
| CIMT/G-CSF | 315-13-2i | 90 | 3 | 39,9  |
| CIMT/G-CSF | 315-14-1i | 90 | 0 | 2,4   |
| CIMT/G-CSF | 315-14-2i | 90 | 2 | 26,9  |
| G-CSF      | 220-16-1i | 90 | 4 | 65,6  |
| G-CSF      | 220-17-1i | 90 | 2 | 24,7  |
| G-CSF      | 220-18-1i | 90 | 3 | 30,5  |
| G-CSF      | 220-19-1i | 90 | 5 | 69,8  |

|       |           |    |   |       |
|-------|-----------|----|---|-------|
| G-CSF | 220-7-1i  | 90 | 3 | 43    |
| G-CSF | 221-13-1i | 90 | 3 | 48,8  |
| G-CSF | 221-16-1i | 90 | 3 | 47,2  |
| G-CSF | 221-19-1i | 90 | 5 | 247,3 |
| G-CSF | 221-22-1i | 90 | 9 | 138,6 |
| G-CSF | 221-6-1i  | 90 | 2 | 57,4  |
| G-CSF | 222-16-1i | 90 | 2 | 35,7  |
| G-CSF | 222-17-1i | 90 | 7 | 132,3 |
| G-CSF | 222-21-1i | 90 | 3 | 24,4  |
| G-CSF | 222-23-1i | 90 | 5 | 87,3  |
| G-CSF | 222-8-1i  | 90 | 4 | 61,8  |
| G-CSF | 301-18-1i | 90 | 5 | 62,1  |
| G-CSF | 301-19-1i | 90 | 9 | 160,9 |
| G-CSF | 301-20-1i | 90 | 3 | 56,6  |
| G-CSF | 301-20-2i | 90 | 1 | 17    |
| G-CSF | 301-20-3i | 90 | 1 | 10,2  |
| G-CSF | 302-16-1i | 90 | 3 | 37,7  |
| G-CSF | 302-16-2i | 90 | 1 | 10,6  |
| G-CSF | 302-17-1i | 90 | 2 | 24,7  |
| G-CSF | 302-17-2i | 90 | 1 | 12,3  |
| G-CSF | 302-18-1i | 90 | 1 | 13,9  |
| G-CSF | 303-15-1i | 90 | 1 | 12    |
| G-CSF | 303-16-1i | 90 | 4 | 50,5  |
| G-CSF | 303-16-2i | 90 | 6 | 86,9  |
| G-CSF | 303-17-1i | 90 | 1 | 18,8  |
| G-CSF | 303-17-2i | 90 | 1 | 12    |

apical dendrite Sholl 100 $\mu$ m

| Group   | number    | Radius( $\mu$ m) | Intersections | Length( $\mu$ m) |
|---------|-----------|------------------|---------------|------------------|
| Control | 215-11-1i | 100              | 3             | 44,9             |
| Control | 215-15-1i | 100              | 1             | 31               |
| Control | 215-16-1i | 100              | 3             | 82,1             |
| Control | 215-18-1i | 100              | 4             | 50               |
| Control | 215-9-1i  | 100              | 2             | 22,6             |
| Control | 216-12-1i | 100              | 2             | 21,1             |
| Control | 216-18-1i | 100              | 1             | 10,6             |
| Control | 216-19-1i | 100              | 2             | 25,5             |
| Control | 216-22-1i | 100              | 2             | 57,4             |
| Control | 216-6-1i  | 100              | 5             | 78,5             |
| Control | 216-8-1i  | 100              | 6             | 125,2            |
| Control | 219-10-1i | 100              | 2             | 63               |
| Control | 219-14-1i | 100              | 4             | 50               |
| Control | 219-15-1i | 100              | 1             | 10,4             |
| Control | 219-17-1i | 100              | 2             | 47,5             |
| Control | 219-21-1i | 100              | 2             | 41,8             |
| Control | 297-19-1i | 100              | 7             | 84,4             |
| Control | 297-19-2i | 100              | 5             | 66,9             |
| Control | 297-20-1i | 100              | 4             | 60               |
| Control | 297-22-1i | 100              | 3             | 38               |
| Control | 297-22-2i | 100              | 4             | 99,7             |
| Control | 298-15-1i | 100              | 3             | 40,8             |
| Control | 298-15-2i | 100              | 8             | 91,4             |
| Control | 298-16-1i | 100              | 4             | 55,6             |
| Control | 298-17-1i | 100              | 8             | 114,1            |

|            |           |     |   |       |
|------------|-----------|-----|---|-------|
| Control    | 298-18-1i | 100 | 4 | 54,5  |
| Control    | 308-17-1i | 100 | 3 | 52    |
| Control    | 308-18-1i | 100 | 2 | 57,7  |
| Control    | 308-18-2i | 100 | 6 | 101,4 |
| Control    | 308-21-1i | 100 | 2 | 24,7  |
| Control    | 308-21-2i | 100 | 4 | 63    |
| CIMT       | 211-10-1i | 100 | 4 | 84,3  |
| CIMT       | 211-13-1i | 100 | 3 | 34,8  |
| CIMT       | 211-13-2i | 100 | 0 | 15,2  |
| CIMT       | 211-14-1i | 100 | 1 | 10,6  |
| CIMT       | 211-14-2i | 100 | 3 | 49,1  |
| CIMT       | 211-15-1i | 100 | 1 | 28,5  |
| CIMT       | 211-15-2i | 100 | 2 | 59,7  |
| CIMT       | 212-13-1i | 100 | 4 | 93    |
| CIMT       | 212-13-2i | 100 | 3 | 53,8  |
| CIMT       | 212-14-1i | 100 | 3 | 36,9  |
| CIMT       | 212-14-2i | 100 | 2 | 48    |
| CIMT       | 212-15-1i | 100 | 2 | 30,6  |
| CIMT       | 218-11-1i | 100 | 2 | 28,3  |
| CIMT       | 218-14-1i | 100 | 3 | 55,1  |
| CIMT       | 218-16-1i | 100 | 1 | 10,6  |
| CIMT       | 218-17-1i | 100 | 3 | 41,1  |
| CIMT       | 218-19-1i | 100 | 1 | 10,3  |
| CIMT       | 299-14-1i | 100 | 2 | 23,7  |
| CIMT       | 299-14-2i | 100 | 1 | 10,9  |
| CIMT       | 299-15-1i | 100 | 5 | 46,5  |
| CIMT       | 299-16-1i | 100 | 2 | 43    |
| CIMT       | 299-17-1i | 100 | 2 | 44,1  |
| CIMT       | 300-16-1i | 100 | 2 | 47,2  |
| CIMT       | 300-20-1i | 100 | 4 | 63,2  |
| CIMT       | 300-22-1i | 100 | 2 | 26,3  |
| CIMT       | 300-24-1i | 100 | 7 | 106,6 |
| CIMT       | 300-24-2i | 100 | 4 | 50,3  |
| CIMT       | 309-15-1i | 100 | 5 | 60,6  |
| CIMT       | 309-15-2i | 100 | 4 | 89,1  |
| CIMT       | 309-16-1i | 100 | 2 | 26,5  |
| CIMT       | 309-16-2i | 100 | 5 | 56,4  |
| CIMT       | 309-17-1i | 100 | 5 | 67,8  |
| CIMT+G-CSF | 213-12-1i | 100 | 1 | 52,4  |
| CIMT+G-CSF | 213-14-1i | 100 | 2 | 47,8  |
| CIMT+G-CSF | 213-17-1i | 100 | 2 | 40,6  |
| CIMT+G-CSF | 213-18-1i | 100 | 4 | 33,6  |
| CIMT+G-CSF | 213-8-1i  | 100 | 2 | 15,7  |
| CIMT+G-CSF | 214-14-1i | 100 | 1 | 27,5  |
| CIMT+G-CSF | 214-14-2i | 100 | 1 | 32,4  |
| CIMT+G-CSF | 214-17-1i | 100 | 2 | 32,6  |
| CIMT+G-CSF | 214-18-1i | 100 | 3 | 69,1  |
| CIMT+G-CSF | 214-19-1i | 100 | 3 | 43,3  |
| CIMT+G-CSF | 217-10-1i | 100 | 3 | 42,6  |
| CIMT+G-CSF | 217-16-1i | 100 | 4 | 82,8  |
| CIMT+G-CSF | 217-17-1i | 100 | 6 | 104,3 |
| CIMT+G-CSF | 217-6-1i  | 100 | 8 | 112,2 |
| CIMT+G-CSF | 217-8-1i  | 100 | 2 | 37    |
| CIMT+G-CSF | 304-19-1i | 100 | 2 | 28    |
| CIMT+G-CSF | 304-19-2i | 100 | 3 | 38    |
| CIMT+G-CSF | 304-21-1i | 100 | 1 | 14,9  |

|                      |     |   |       |
|----------------------|-----|---|-------|
| CIMT+G-CSF 304-22-1i | 100 | 1 | 10,4  |
| CIMT+G-CSF 305-17-1i | 100 | 2 | 21,4  |
| CIMT+G-CSF 305-17-2i | 100 | 5 | 73,3  |
| CIMT+G-CSF 305-18-1i | 100 | 1 | 10,6  |
| CIMT+G-CSF 305-19-1i | 100 | 4 | 29,5  |
| CIMT+G-CSF 305-19-2i | 100 | 3 | 40    |
| CIMT/G-CSF 306-17-1i | 100 | 3 | 64,6  |
| CIMT/G-CSF 306-17-2i | 100 | 1 | 11,1  |
| CIMT/G-CSF 306-18-1i | 100 | 4 | 82,6  |
| CIMT/G-CSF 306-18-2i | 100 | 1 | 12,5  |
| CIMT/G-CSF 306-18-3i | 100 | 2 | 17,2  |
| CIMT/G-CSF 311-16-1i | 100 | 2 | 29    |
| CIMT/G-CSF 311-17-1i | 100 | 7 | 116,7 |
| CIMT/G-CSF 311-17-2i | 100 | 6 | 72,8  |
| CIMT/G-CSF 311-18-1i | 100 | 2 | 31,7  |
| CIMT/G-CSF 311-19-1i | 100 | 7 | 103,7 |
| CIMT/G-CSF 313-14.1i | 100 | 2 | 23,1  |
| CIMT/G-CSF 313-15-1i | 100 | 2 | 30,4  |
| CIMT/G-CSF 313-17-1i | 100 | 2 | 27,4  |
| CIMT/G-CSF 313-19-1i | 100 | 1 | 10,7  |
| CIMT/G-CSF 313-19-2i | 100 | 3 | 47,8  |
| CIMT/G-CSF 314-16-1i | 100 | 6 | 39,2  |
| CIMT/G-CSF 314-16-2i | 100 | 5 | 60,5  |
| CIMT/G-CSF 314-17-1i | 100 | 1 | 10,6  |
| CIMT/G-CSF 314-17-2i | 100 | 3 | 25,9  |
| CIMT/G-CSF 314-18-1i | 100 | 2 | 27,1  |
| CIMT/G-CSF 315-11-1i | 100 | 1 | 13,3  |
| CIMT/G-CSF 315-11-2i | 100 | 1 | 11,6  |
| CIMT/G-CSF 315-13-1i | 100 | 3 | 35,9  |
| CIMT/G-CSF 315-14-1i | 100 | 2 | 36,8  |
| CIMT/G-CSF 315-14-2i | 100 | 4 | 57,8  |
| G-CSF 220-16-1i      | 100 | 1 | 19,1  |
| G-CSF 220-17-1i      | 100 | 3 | 30,9  |
| G-CSF 220-18-1i      | 100 | 5 | 75,6  |
| G-CSF 220-19-1i      | 100 | 4 | 51,1  |
| G-CSF 220-7-1i       | 100 | 1 | 23    |
| G-CSF 221-13-1i      | 100 | 2 | 37    |
| G-CSF 221-16-1i      | 100 | 3 | 57,7  |
| G-CSF 221-19-1i      | 100 | 8 | 107,7 |
| G-CSF 221-22-1i      | 100 | 2 | 27,8  |
| G-CSF 221-6-1i       | 100 | 2 | 29,6  |
| G-CSF 222-16-1i      | 100 | 9 | 105,2 |
| G-CSF 222-17-1i      | 100 | 3 | 57,7  |
| G-CSF 222-21-1i      | 100 | 4 | 51,7  |
| G-CSF 222-23-1i      | 100 | 5 | 49,4  |
| G-CSF 222-8-1i       | 100 | 2 | 50,6  |
| G-CSF 301-18-1i      | 100 | 4 | 119,8 |
| G-CSF 301-19-1i      | 100 | 3 | 49,7  |
| G-CSF 301-20-1i      | 100 | 1 | 10,7  |
| G-CSF 301-20-2i      | 100 | 1 | 10,2  |
| G-CSF 301-20-3i      | 100 | 3 | 33,9  |
| G-CSF 302-16-1i      | 100 | 1 | 11,5  |
| G-CSF 302-16-2i      | 100 | 1 | 14,8  |
| G-CSF 302-17-1i      | 100 | 0 | 0,8   |
| G-CSF 302-17-2i      | 100 | 1 | 10,1  |
| G-CSF 302-18-1i      | 100 | 1 | 10,2  |



|       |           |     |   |      |
|-------|-----------|-----|---|------|
| G-CSF | 303-15-1i | 100 | 6 | 61,2 |
| G-CSF | 303-16-1i | 100 | 4 | 56,5 |
| G-CSF | 303-16-2i | 100 | 1 | 13   |
| G-CSF | 303-17-1i | 100 | 1 | 11   |
| G-CSF | 303-17-2i | 100 | 1 | 37,2 |

apical dendrite Sholl 110 $\mu$ m

| Group   | number    | Radius( $\mu$ m) | Intersections | Length( $\mu$ m) |
|---------|-----------|------------------|---------------|------------------|
| Control | 215-11-1i | 110              | 1             | 35,1             |
| Control | 215-15-1i | 110              | 1             | 11,5             |
| Control | 215-16-1i | 110              | 2             | 36,5             |
| Control | 215-18-1i | 110              | 3             | 53               |
| Control | 215-9-1i  | 110              | 1             | 20,1             |
| Control | 216-12-1i | 110              | 1             | 15,9             |
| Control | 216-18-1i | 110              | 0             | 3,8              |
| Control | 216-19-1i | 110              | 1             | 29,7             |
| Control | 216-22-1i | 110              | 2             | 21,4             |
| Control | 216-6-1i  | 110              | 5             | 85,4             |
| Control | 216-8-1i  | 110              | 4             | 79,4             |
| Control | 219-10-1i | 110              | 2             | 23,8             |
| Control | 219-14-1i | 110              | 4             | 52,9             |
| Control | 219-15-1i | 110              | 1             | 10,6             |
| Control | 219-17-1i | 110              | 2             | 40,9             |
| Control | 219-21-1i | 110              | 2             | 34,6             |
| Control | 297-19-1i | 110              | 3             | 68,7             |
| Control | 297-19-2i | 110              | 4             | 118,2            |
| Control | 297-20-1i | 110              | 3             | 47,1             |
| Control | 297-22-1i | 110              | 2             | 34,3             |
| Control | 297-22-2i | 110              | 4             | 51,8             |
| Control | 298-15-1i | 110              | 2             | 31,2             |
| Control | 298-15-2i | 110              | 4             | 154,6            |
| Control | 298-16-1i | 110              | 5             | 64,9             |
| Control | 298-17-1i | 110              | 8             | 102,4            |
| Control | 298-18-1i | 110              | 4             | 43,5             |
| Control | 308-17-1i | 110              | 1             | 44,8             |
| Control | 308-18-1i | 110              | 2             | 25,9             |
| Control | 308-18-2i | 110              | 6             | 103,6            |
| Control | 308-21-1i | 110              | 2             | 26,9             |
| Control | 308-21-2i | 110              | 4             | 56,6             |
| CIMT    | 211-10-1i | 110              | 5             | 56,7             |
| CIMT    | 211-13-1i | 110              | 2             | 43,7             |
| CIMT    | 211-14-1i | 110              | 2             | 29,3             |
| CIMT    | 211-14-2i | 110              | 1             | 32,7             |
| CIMT    | 211-15-1i | 110              | 1             | 11,5             |
| CIMT    | 211-15-2i | 110              | 1             | 14               |
| CIMT    | 212-13-1i | 110              | 3             | 55,8             |
| CIMT    | 212-13-2i | 110              | 3             | 34,7             |
| CIMT    | 212-14-1i | 110              | 3             | 34,8             |
| CIMT    | 212-14-2i | 110              | 1             | 38,3             |
| CIMT    | 212-15-1i | 110              | 2             | 23               |
| CIMT    | 218-11-1i | 110              | 2             | 25               |
| CIMT    | 218-14-1i | 110              | 2             | 34,4             |
| CIMT    | 218-16-1i | 110              | 1             | 11,2             |
| CIMT    | 218-17-1i | 110              | 3             | 39,5             |

|            |           |     |   |       |
|------------|-----------|-----|---|-------|
| CIMT       | 218-19-1i | 110 | 2 | 23,8  |
| CIMT       | 299-14-1i | 110 | 2 | 20,8  |
| CIMT       | 299-14-2i | 110 | 2 | 26,5  |
| CIMT       | 299-15-1i | 110 | 2 | 73,6  |
| CIMT       | 299-16-1i | 110 | 2 | 21,3  |
| CIMT       | 299-17-1i | 110 | 2 | 24,5  |
| CIMT       | 300-16-1i | 110 | 1 | 18    |
| CIMT       | 300-20-1i | 110 | 3 | 38,3  |
| CIMT       | 300-22-1i | 110 | 2 | 25,7  |
| CIMT       | 300-24-1i | 110 | 7 | 83,9  |
| CIMT       | 300-24-2i | 110 | 3 | 37,4  |
| CIMT       | 309-15-1i | 110 | 5 | 66    |
| CIMT       | 309-15-2i | 110 | 3 | 56,2  |
| CIMT       | 309-16-1i | 110 | 1 | 12,4  |
| CIMT       | 309-16-2i | 110 | 5 | 68,5  |
| CIMT       | 309-17-1i | 110 | 3 | 51,4  |
| CIMT+G-CSF | 213-12-1i | 110 | 2 | 20,6  |
| CIMT+G-CSF | 213-14-1i | 110 | 1 | 16,3  |
| CIMT+G-CSF | 213-17-1i | 110 | 1 | 15,4  |
| CIMT+G-CSF | 213-18-1i | 110 | 4 | 46,3  |
| CIMT+G-CSF | 213-8-1i  | 110 | 1 | 13,9  |
| CIMT+G-CSF | 214-14-1i | 110 | 1 | 12    |
| CIMT+G-CSF | 214-14-2i | 110 | 0 | 15,8  |
| CIMT+G-CSF | 214-17-1i | 110 | 3 | 32,6  |
| CIMT+G-CSF | 214-18-1i | 110 | 3 | 37    |
| CIMT+G-CSF | 214-19-1i | 110 | 2 | 51,1  |
| CIMT+G-CSF | 217-10-1i | 110 | 3 | 39,4  |
| CIMT+G-CSF | 217-16-1i | 110 | 4 | 49,4  |
| CIMT+G-CSF | 217-17-1i | 110 | 6 | 66,8  |
| CIMT+G-CSF | 217-6-1i  | 110 | 8 | 133,3 |
| CIMT+G-CSF | 217-8-1i  | 110 | 2 | 23,5  |
| CIMT+G-CSF | 304-19-1i | 110 | 2 | 25,8  |
| CIMT+G-CSF | 304-19-2i | 110 | 2 | 31,1  |
| CIMT+G-CSF | 304-21-1i | 110 | 1 | 10,3  |
| CIMT+G-CSF | 304-22-1i | 110 | 1 | 10,3  |
| CIMT+G-CSF | 305-17-1i | 110 | 2 | 27,4  |
| CIMT+G-CSF | 305-17-2i | 110 | 3 | 52,3  |
| CIMT+G-CSF | 305-18-1i | 110 | 1 | 11,2  |
| CIMT+G-CSF | 305-19-1i | 110 | 3 | 48,1  |
| CIMT+G-CSF | 305-19-2i | 110 | 3 | 35,1  |
| CIMT/G-CSF | 306-17-1i | 110 | 3 | 74,2  |
| CIMT/G-CSF | 306-17-2i | 110 | 1 | 10,2  |
| CIMT/G-CSF | 306-18-1i | 110 | 4 | 51,7  |
| CIMT/G-CSF | 306-18-2i | 110 | 1 | 15,3  |
| CIMT/G-CSF | 306-18-3i | 110 | 1 | 38,2  |
| CIMT/G-CSF | 311-16-1i | 110 | 1 | 23,2  |
| CIMT/G-CSF | 311-17-1i | 110 | 9 | 114,8 |
| CIMT/G-CSF | 311-17-2i | 110 | 8 | 148   |
| CIMT/G-CSF | 311-18-1i | 110 | 2 | 31,7  |
| CIMT/G-CSF | 311-19-1i | 110 | 6 | 75    |
| CIMT/G-CSF | 313-14.1i | 110 | 1 | 18,7  |
| CIMT/G-CSF | 313-15-1i | 110 | 2 | 32,2  |
| CIMT/G-CSF | 313-17-1i | 110 | 1 | 28    |
| CIMT/G-CSF | 313-19-1i | 110 | 1 | 10,5  |
| CIMT/G-CSF | 313-19-2i | 110 | 4 | 83,2  |
| CIMT/G-CSF | 314-16-1i | 110 | 3 | 61    |

|            |           |     |    |       |
|------------|-----------|-----|----|-------|
| CIMT/G-CSF | 314-16-2i | 110 | 2  | 38,7  |
| CIMT/G-CSF | 314-17-1i | 110 | 2  | 33,9  |
| CIMT/G-CSF | 314-17-2i | 110 | 2  | 32    |
| CIMT/G-CSF | 314-18-1i | 110 | 2  | 28,2  |
| CIMT/G-CSF | 315-11-1i | 110 | 2  | 22,8  |
| CIMT/G-CSF | 315-11-2i | 110 | 2  | 35,4  |
| CIMT/G-CSF | 315-13-1i | 110 | 0  | 8,8   |
| CIMT/G-CSF | 315-14-1i | 110 | 2  | 24,8  |
| CIMT/G-CSF | 315-14-2i | 110 | 3  | 45,3  |
| G-CSF      | 220-16-1i | 110 | 2  | 21,6  |
| G-CSF      | 220-17-1i | 110 | 2  | 24,2  |
| G-CSF      | 220-18-1i | 110 | 6  | 84,8  |
| G-CSF      | 220-19-1i | 110 | 2  | 86,2  |
| G-CSF      | 220-7-1i  | 110 | 1  | 10,5  |
| G-CSF      | 221-13-1i | 110 | 2  | 21,1  |
| G-CSF      | 221-16-1i | 110 | 3  | 47,5  |
| G-CSF      | 221-19-1i | 110 | 11 | 130,5 |
| G-CSF      | 221-22-1i | 110 | 2  | 25,2  |
| G-CSF      | 221-6-1i  | 110 | 1  | 15,2  |
| G-CSF      | 222-16-1i | 110 | 4  | 96,2  |
| G-CSF      | 222-17-1i | 110 | 2  | 36,7  |
| G-CSF      | 222-21-1i | 110 | 3  | 33    |
| G-CSF      | 222-23-1i | 110 | 4  | 55,2  |
| G-CSF      | 222-8-1i  | 110 | 2  | 23,2  |
| G-CSF      | 301-18-1i | 110 | 4  | 64,5  |
| G-CSF      | 301-19-1i | 110 | 2  | 33,2  |
| G-CSF      | 301-20-1i | 110 | 1  | 10    |
| G-CSF      | 301-20-2i | 110 | 1  | 12,4  |
| G-CSF      | 301-20-3i | 110 | 3  | 33,6  |
| G-CSF      | 302-16-1i | 110 | 1  | 10,3  |
| G-CSF      | 302-16-2i | 110 | 2  | 67,8  |
| G-CSF      | 302-17-2i | 110 | 1  | 12,3  |
| G-CSF      | 302-18-1i | 110 | 1  | 13,2  |
| G-CSF      | 303-15-1i | 110 | 5  | 105,9 |
| G-CSF      | 303-16-1i | 110 | 4  | 46    |
| G-CSF      | 303-16-2i | 110 | 1  | 11,3  |
| G-CSF      | 303-17-1i | 110 | 0  | 3,9   |
| G-CSF      | 303-17-2i | 110 | 1  | 12,2  |

apical dendrite Sholl 120µm

| Group   | number    | Radius(µm) | Intersections | Length(µm) |
|---------|-----------|------------|---------------|------------|
| Control | 215-11-1i | 120        | 1             | 12,3       |
| Control | 215-15-1i | 120        | 1             | 11,8       |
| Control | 215-16-1i | 120        | 2             | 29,6       |
| Control | 215-18-1i | 120        | 2             | 31         |
| Control | 215-9-1i  | 120        | 1             | 19,5       |
| Control | 216-12-1i | 120        | 1             | 10,7       |
| Control | 216-19-1i | 120        | 1             | 11         |
| Control | 216-22-1i | 120        | 2             | 22         |
| Control | 216-6-1i  | 120        | 5             | 69,1       |
| Control | 216-8-1i  | 120        | 4             | 57,5       |
| Control | 219-10-1i | 120        | 3             | 53,6       |
| Control | 219-14-1i | 120        | 5             | 58,1       |
| Control | 219-15-1i | 120        | 2             | 37,1       |

|            |           |     |   |       |
|------------|-----------|-----|---|-------|
| Control    | 219-17-1i | 120 | 3 | 36,5  |
| Control    | 219-21-1i | 120 | 1 | 25,3  |
| Control    | 297-19-1i | 120 | 2 | 101,5 |
| Control    | 297-19-2i | 120 | 2 | 29,1  |
| Control    | 297-20-1i | 120 | 3 | 33,7  |
| Control    | 297-22-1i | 120 | 2 | 25,3  |
| Control    | 297-22-2i | 120 | 2 | 43,2  |
| Control    | 298-15-1i | 120 | 1 | 18,3  |
| Control    | 298-15-2i | 120 | 4 | 79,7  |
| Control    | 298-16-1i | 120 | 6 | 168,1 |
| Control    | 298-17-1i | 120 | 9 | 113,6 |
| Control    | 298-18-1i | 120 | 2 | 29,4  |
| Control    | 308-17-1i | 120 | 1 | 11,6  |
| Control    | 308-18-1i | 120 | 3 | 68,2  |
| Control    | 308-18-2i | 120 | 5 | 77,1  |
| Control    | 308-21-1i | 120 | 3 | 29,8  |
| Control    | 308-21-2i | 120 | 4 | 52,6  |
| CIMT       | 211-10-1i | 120 | 5 | 61,5  |
| CIMT       | 211-13-1i | 120 | 2 | 25    |
| CIMT       | 211-14-1i | 120 | 1 | 20,3  |
| CIMT       | 211-14-2i | 120 | 1 | 48,5  |
| CIMT       | 211-15-1i | 120 | 1 | 10,5  |
| CIMT       | 211-15-2i | 120 | 1 | 10,3  |
| CIMT       | 212-13-1i | 120 | 2 | 34,3  |
| CIMT       | 212-13-2i | 120 | 2 | 23,8  |
| CIMT       | 212-14-1i | 120 | 2 | 31,4  |
| CIMT       | 212-14-2i | 120 | 1 | 10,5  |
| CIMT       | 212-15-1i | 120 | 2 | 28    |
| CIMT       | 218-11-1i | 120 | 1 | 15,8  |
| CIMT       | 218-14-1i | 120 | 2 | 31,6  |
| CIMT       | 218-16-1i | 120 | 1 | 11,3  |
| CIMT       | 218-17-1i | 120 | 4 | 67,9  |
| CIMT       | 218-19-1i | 120 | 2 | 27,6  |
| CIMT       | 299-14-1i | 120 | 2 | 22,7  |
| CIMT       | 299-14-2i | 120 | 2 | 23,9  |
| CIMT       | 299-15-1i | 120 | 1 | 10,9  |
| CIMT       | 299-16-1i | 120 | 2 | 25,7  |
| CIMT       | 299-17-1i | 120 | 4 | 44,4  |
| CIMT       | 300-16-1i | 120 | 1 | 10,8  |
| CIMT       | 300-20-1i | 120 | 2 | 28,4  |
| CIMT       | 300-22-1i | 120 | 0 | 17,8  |
| CIMT       | 300-24-1i | 120 | 4 | 73,7  |
| CIMT       | 300-24-2i | 120 | 0 | 19,9  |
| CIMT       | 309-15-1i | 120 | 6 | 78,4  |
| CIMT       | 309-15-2i | 120 | 4 | 48,6  |
| CIMT       | 309-16-1i | 120 | 1 | 10,3  |
| CIMT       | 309-16-2i | 120 | 5 | 67,6  |
| CIMT       | 309-17-1i | 120 | 3 | 34,8  |
| CIMT+G-CSF | 213-12-1i | 120 | 0 | 14    |
| CIMT+G-CSF | 213-14-1i | 120 | 2 | 20,2  |
| CIMT+G-CSF | 213-17-1i | 120 | 1 | 10,2  |
| CIMT+G-CSF | 213-18-1i | 120 | 0 | 21,7  |
| CIMT+G-CSF | 213-8-1i  | 120 | 1 | 11,1  |
| CIMT+G-CSF | 214-14-1i | 120 | 1 | 13,5  |
| CIMT+G-CSF | 214-17-1i | 120 | 2 | 32,4  |
| CIMT+G-CSF | 214-18-1i | 120 | 4 | 35,3  |

|                      |     |   |       |
|----------------------|-----|---|-------|
| CIMT+G-CSF 214-19-1i | 120 | 0 | 23,7  |
| CIMT+G-CSF 217-10-1i | 120 | 6 | 40,6  |
| CIMT+G-CSF 217-16-1i | 120 | 4 | 49,3  |
| CIMT+G-CSF 217-17-1i | 120 | 8 | 80,5  |
| CIMT+G-CSF 217-6-1i  | 120 | 7 | 109,2 |
| CIMT+G-CSF 217-8-1i  | 120 | 2 | 21,9  |
| CIMT+G-CSF 304-19-1i | 120 | 1 | 22,7  |
| CIMT+G-CSF 304-19-2i | 120 | 1 | 18,4  |
| CIMT+G-CSF 304-21-1i | 120 | 0 | 4,6   |
| CIMT+G-CSF 304-22-1i | 120 | 1 | 11,2  |
| CIMT+G-CSF 305-17-1i | 120 | 2 | 23,2  |
| CIMT+G-CSF 305-17-2i | 120 | 2 | 48,6  |
| CIMT+G-CSF 305-18-1i | 120 | 1 | 10,4  |
| CIMT+G-CSF 305-19-1i | 120 | 3 | 35,6  |
| CIMT+G-CSF 305-19-2i | 120 | 3 | 33,1  |
| CIMT/G-CSF 306-17-1i | 120 | 3 | 40,1  |
| CIMT/G-CSF 306-17-2i | 120 | 1 | 10,8  |
| CIMT/G-CSF 306-18-1i | 120 | 3 | 70,5  |
| CIMT/G-CSF 306-18-2i | 120 | 1 | 10,6  |
| CIMT/G-CSF 306-18-3i | 120 | 2 | 28,7  |
| CIMT/G-CSF 311-16-1i | 120 | 2 | 65,2  |
| CIMT/G-CSF 311-17-1i | 120 | 8 | 102,9 |
| CIMT/G-CSF 311-17-2i | 120 | 8 | 107,3 |
| CIMT/G-CSF 311-18-1i | 120 | 2 | 25,9  |
| CIMT/G-CSF 311-19-1i | 120 | 7 | 108,4 |
| CIMT/G-CSF 313-14.1i | 120 | 0 | 3,4   |
| CIMT/G-CSF 313-15-1i | 120 | 1 | 22,6  |
| CIMT/G-CSF 313-17-1i | 120 | 1 | 11    |
| CIMT/G-CSF 313-19-1i | 120 | 1 | 11,1  |
| CIMT/G-CSF 313-19-2i | 120 | 2 | 37,3  |
| CIMT/G-CSF 314-16-1i | 120 | 3 | 48,1  |
| CIMT/G-CSF 314-16-2i | 120 | 2 | 22,6  |
| CIMT/G-CSF 314-17-1i | 120 | 2 | 26,3  |
| CIMT/G-CSF 314-17-2i | 120 | 3 | 49,9  |
| CIMT/G-CSF 314-18-1i | 120 | 5 | 53,2  |
| CIMT/G-CSF 315-11-1i | 120 | 1 | 12,7  |
| CIMT/G-CSF 315-11-2i | 120 | 2 | 31,9  |
| CIMT/G-CSF 315-14-1i | 120 | 2 | 23,4  |
| CIMT/G-CSF 315-14-2i | 120 | 2 | 33,3  |
| G-CSF 220-16-1i      | 120 | 1 | 22,4  |
| G-CSF 220-17-1i      | 120 | 1 | 12,9  |
| G-CSF 220-18-1i      | 120 | 3 | 80,9  |
| G-CSF 220-19-1i      | 120 | 1 | 27,3  |
| G-CSF 220-7-1i       | 120 | 1 | 10,6  |
| G-CSF 221-13-1i      | 120 | 2 | 21,5  |
| G-CSF 221-16-1i      | 120 | 2 | 36,4  |
| G-CSF 221-19-1i      | 120 | 9 | 174,3 |
| G-CSF 221-22-1i      | 120 | 2 | 47,6  |
| G-CSF 221-6-1i       | 120 | 1 | 11    |
| G-CSF 222-16-1i      | 120 | 3 | 36,3  |
| G-CSF 222-17-1i      | 120 | 2 | 27,8  |
| G-CSF 222-21-1i      | 120 | 2 | 29    |
| G-CSF 222-23-1i      | 120 | 3 | 46,2  |
| G-CSF 222-8-1i       | 120 | 3 | 24,9  |
| G-CSF 301-18-1i      | 120 | 4 | 57    |
| G-CSF 301-19-1i      | 120 | 2 | 26,2  |

|       |           |     |   |      |
|-------|-----------|-----|---|------|
| G-CSF | 301-20-1i | 120 | 1 | 10,8 |
| G-CSF | 301-20-2i | 120 | 1 | 10,4 |
| G-CSF | 301-20-3i | 120 | 3 | 31,4 |
| G-CSF | 302-16-1i | 120 | 1 | 12,8 |
| G-CSF | 302-16-2i | 120 | 1 | 21,1 |
| G-CSF | 302-17-2i | 120 | 1 | 11,2 |
| G-CSF | 302-18-1i | 120 | 1 | 11,7 |
| G-CSF | 303-15-1i | 120 | 5 | 68,6 |
| G-CSF | 303-16-1i | 120 | 3 | 42   |
| G-CSF | 303-16-2i | 120 | 3 | 52   |
| G-CSF | 303-17-2i | 120 | 0 | 8,6  |

apical dendrite Sholl 140 $\mu$ m

| Group   | number    | Radius( $\mu$ m) | Intersections | Length( $\mu$ m) |
|---------|-----------|------------------|---------------|------------------|
| Control | 215-11-1i | 140              | 1             | 12,8             |
| Control | 215-15-1i | 140              | 0             | 12,1             |
| Control | 215-16-1i | 140              | 2             | 22,8             |
| Control | 215-18-1i | 140              | 0             | 11,1             |
| Control | 215-9-1i  | 140              | 0             | 11,5             |
| Control | 216-12-1i | 140              | 1             | 11,9             |
| Control | 216-19-1i | 140              | 1             | 10,2             |
| Control | 216-22-1i | 140              | 1             | 20,4             |
| Control | 216-6-1i  | 140              | 2             | 31,8             |
| Control | 216-8-1i  | 140              | 3             | 33,7             |
| Control | 219-10-1i | 140              | 4             | 128,2            |
| Control | 219-14-1i | 140              | 2             | 42,8             |
| Control | 219-15-1i | 140              | 1             | 25,9             |
| Control | 219-17-1i | 140              | 2             | 27,1             |
| Control | 219-21-1i | 140              | 0             | 12,2             |
| Control | 297-19-1i | 140              | 1             | 11,5             |
| Control | 297-19-2i | 140              | 4             | 85,5             |
| Control | 297-20-1i | 140              | 3             | 144,4            |
| Control | 297-22-1i | 140              | 2             | 21,8             |
| Control | 298-15-2i | 140              | 2             | 23,3             |
| Control | 298-16-1i | 140              | 2             | 77,1             |
| Control | 298-17-1i | 140              | 8             | 85,7             |
| Control | 298-18-1i | 140              | 1             | 17,9             |
| Control | 308-17-1i | 140              | 1             | 10,9             |
| Control | 308-18-1i | 140              | 1             | 57,5             |
| Control | 308-18-2i | 140              | 3             | 40,8             |
| Control | 308-21-1i | 140              | 2             | 31,7             |
| Control | 308-21-2i | 140              | 1             | 10,5             |
| CIMT    | 211-10-1i | 140              | 5             | 48,9             |
| CIMT    | 211-13-1i | 140              | 3             | 56               |
| CIMT    | 211-14-1i | 140              | 1             | 12,2             |
| CIMT    | 211-15-1i | 140              | 2             | 48,7             |
| CIMT    | 211-15-2i | 140              | 0             | 24               |
| CIMT    | 212-13-1i | 140              | 3             | 22,9             |
| CIMT    | 212-13-2i | 140              | 2             | 13,5             |
| CIMT    | 212-14-1i | 140              | 1             | 14,2             |
| CIMT    | 212-14-2i | 140              | 2             | 20,1             |
| CIMT    | 212-15-1i | 140              | 3             | 41,6             |
| CIMT    | 218-11-1i | 140              | 1             | 10,5             |
| CIMT    | 218-14-1i | 140              | 1             | 19,1             |

|            |           |     |   |      |
|------------|-----------|-----|---|------|
| CIMT       | 218-16-1i | 140 | 3 | 80,5 |
| CIMT       | 218-17-1i | 140 | 2 | 21,9 |
| CIMT       | 218-19-1i | 140 | 1 | 11,3 |
| CIMT       | 299-14-1i | 140 | 0 | 14,2 |
| CIMT       | 299-14-2i | 140 | 1 | 24   |
| CIMT       | 299-15-1i | 140 | 1 | 16,5 |
| CIMT       | 299-16-1i | 140 | 2 | 59,3 |
| CIMT       | 299-17-1i | 140 | 2 | 21,1 |
| CIMT       | 300-20-1i | 140 | 0 | 6,5  |
| CIMT       | 300-24-1i | 140 | 4 | 47   |
| CIMT       | 309-15-1i | 140 | 4 | 70,1 |
| CIMT       | 309-15-2i | 140 | 1 | 10,8 |
| CIMT       | 309-16-1i | 140 | 2 | 10,9 |
| CIMT       | 309-16-2i | 140 | 2 | 37,8 |
| CIMT       | 309-17-1i | 140 | 2 | 61,3 |
| CIMT+G-CSF | 213-14-1i | 140 | 0 | 8,7  |
| CIMT+G-CSF | 213-17-1i | 140 | 2 | 11   |
| CIMT+G-CSF | 213-8-1i  | 140 | 0 | 7,3  |
| CIMT+G-CSF | 214-14-1i | 140 | 3 | 54,9 |
| CIMT+G-CSF | 214-17-1i | 140 | 2 | 28   |
| CIMT+G-CSF | 217-10-1i | 140 | 2 | 30,1 |
| CIMT+G-CSF | 217-16-1i | 140 | 3 | 41,9 |
| CIMT+G-CSF | 217-17-1i | 140 | 3 | 52,4 |
| CIMT+G-CSF | 217-6-1i  | 140 | 4 | 60,6 |
| CIMT+G-CSF | 217-8-1i  | 140 | 3 | 40,9 |
| CIMT+G-CSF | 304-19-1i | 140 | 1 | 11   |
| CIMT+G-CSF | 304-19-2i | 140 | 0 | 4,3  |
| CIMT+G-CSF | 305-17-1i | 140 | 1 | 11,7 |
| CIMT+G-CSF | 305-17-2i | 140 | 0 | 11   |
| CIMT+G-CSF | 305-18-1i | 140 | 0 | 10,9 |
| CIMT+G-CSF | 305-19-1i | 140 | 3 | 36,5 |
| CIMT+G-CSF | 305-19-2i | 140 | 3 | 48,4 |
| CIMT/G-CSF | 306-17-1i | 140 | 3 | 45,9 |
| CIMT/G-CSF | 306-17-2i | 140 | 1 | 10,9 |
| CIMT/G-CSF | 306-18-1i | 140 | 1 | 39,9 |
| CIMT/G-CSF | 306-18-2i | 140 | 1 | 12   |
| CIMT/G-CSF | 306-18-3i | 140 | 2 | 21,6 |
| CIMT/G-CSF | 311-16-1i | 140 | 2 | 43,2 |
| CIMT/G-CSF | 311-17-1i | 140 | 5 | 88,2 |
| CIMT/G-CSF | 311-17-2i | 140 | 3 | 48,8 |
| CIMT/G-CSF | 311-18-1i | 140 | 1 | 10,2 |
| CIMT/G-CSF | 311-19-1i | 140 | 6 | 95   |
| CIMT/G-CSF | 313-15-1i | 140 | 2 | 27,4 |
| CIMT/G-CSF | 313-17-1i | 140 | 1 | 18,8 |
| CIMT/G-CSF | 313-19-1i | 140 | 2 | 30,6 |
| CIMT/G-CSF | 313-19-2i | 140 | 2 | 43,8 |
| CIMT/G-CSF | 314-16-1i | 140 | 2 | 24,2 |
| CIMT/G-CSF | 314-16-2i | 140 | 1 | 16,7 |
| CIMT/G-CSF | 314-17-1i | 140 | 2 | 22,5 |
| CIMT/G-CSF | 314-17-2i | 140 | 3 | 70,2 |
| CIMT/G-CSF | 314-18-1i | 140 | 1 | 40,6 |
| CIMT/G-CSF | 315-11-1i | 140 | 1 | 19,7 |
| CIMT/G-CSF | 315-11-2i | 140 | 3 | 60,9 |
| CIMT/G-CSF | 315-14-1i | 140 | 2 | 23   |
| CIMT/G-CSF | 315-14-2i | 140 | 0 | 3,4  |
| G-CSF      | 220-17-1i | 140 | 1 | 10,4 |

|       |           |     |   |      |
|-------|-----------|-----|---|------|
| G-CSF | 220-18-1i | 140 | 1 | 10,8 |
| G-CSF | 220-19-1i | 140 | 3 | 68,4 |
| G-CSF | 220-7-1i  | 140 | 1 | 11   |
| G-CSF | 221-13-1i | 140 | 1 | 11   |
| G-CSF | 221-16-1i | 140 | 3 | 39,1 |
| G-CSF | 221-19-1i | 140 | 6 | 76,8 |
| G-CSF | 221-22-1i | 140 | 2 | 25,8 |
| G-CSF | 221-6-1i  | 140 | 1 | 10,5 |
| G-CSF | 222-16-1i | 140 | 1 | 21,7 |
| G-CSF | 222-17-1i | 140 | 1 | 18,5 |
| G-CSF | 222-21-1i | 140 | 2 | 22,2 |
| G-CSF | 222-23-1i | 140 | 1 | 11,8 |
| G-CSF | 222-8-1i  | 140 | 1 | 21,4 |
| G-CSF | 301-18-1i | 140 | 1 | 58,5 |
| G-CSF | 301-19-1i | 140 | 1 | 13,1 |
| G-CSF | 301-20-1i | 140 | 1 | 11,5 |
| G-CSF | 301-20-2i | 140 | 1 | 14,5 |
| G-CSF | 301-20-3i | 140 | 4 | 62,8 |
| G-CSF | 302-16-1i | 140 | 1 | 14,2 |
| G-CSF | 302-16-2i | 140 | 0 | 13,2 |
| G-CSF | 302-17-2i | 140 | 1 | 10,4 |
| G-CSF | 302-18-1i | 140 | 1 | 10,3 |
| G-CSF | 303-15-1i | 140 | 2 | 21   |
| G-CSF | 303-16-1i | 140 | 3 | 34,9 |
| G-CSF | 303-16-2i | 140 | 3 | 57,7 |

apical dendrite Sholl 150 $\mu$ m +

| Group   | number    | Radius( $\mu$ m) | Intersections | Length( $\mu$ m) |
|---------|-----------|------------------|---------------|------------------|
| Control | 215-11-1i | 150              | 1             | 12,3             |
| Control | 215-16-1i | 150              | 2             | 26,8             |
| Control | 216-12-1i | 150              | 1             | 13,7             |
| Control | 216-19-1i | 150              | 0             | 10,4             |
| Control | 216-22-1i | 150              | 1             | 12               |
| Control | 216-6-1i  | 150              | 2             | 25,3             |
| Control | 216-8-1i  | 150              | 3             | 39,3             |
| Control | 219-10-1i | 150              | 2             | 80,7             |
| Control | 219-14-1i | 150              | 2             | 20,3             |
| Control | 219-15-1i | 150              | 2             | 37               |
| Control | 219-17-1i | 150              | 2             | 24               |
| Control | 297-19-1i | 150              | 3             | 20,5             |
| Control | 297-19-2i | 150              | 2             | 38,5             |
| Control | 297-20-1i | 150              | 2             | 29,9             |
| Control | 297-22-1i | 150              | 2             | 22               |
| Control | 298-15-2i | 150              | 1             | 25               |
| Control | 298-16-1i | 150              | 1             | 18,9             |
| Control | 298-17-1i | 150              | 4             | 62,3             |
| Control | 298-18-1i | 150              | 1             | 12               |
| Control | 308-17-1i | 150              | 1             | 15,5             |
| Control | 308-18-1i | 150              | 1             | 18               |
| Control | 308-18-2i | 150              | 4             | 107,7            |
| Control | 308-21-1i | 150              | 2             | 22,6             |
| Control | 308-21-2i | 150              | 1             | 11,7             |
| Control | 215-11-1i | 160              | 0             | 1,9              |
| Control | 215-16-1i | 160              | 1             | 27,8             |



|         |           |     |   |      |
|---------|-----------|-----|---|------|
| Control | 216-12-1i | 160 | 1 | 11,2 |
| Control | 216-22-1i | 160 | 1 | 10,2 |
| Control | 216-6-1i  | 160 | 2 | 28,1 |
| Control | 216-8-1i  | 160 | 2 | 25,9 |
| Control | 219-10-1i | 160 | 2 | 27,6 |
| Control | 219-14-1i | 160 | 2 | 20,9 |
| Control | 219-15-1i | 160 | 2 | 48,7 |
| Control | 219-17-1i | 160 | 1 | 13,1 |
| Control | 297-19-1i | 160 | 2 | 81,6 |
| Control | 297-19-2i | 160 | 1 | 15,3 |
| Control | 297-20-1i | 160 | 1 | 12,7 |
| Control | 297-22-1i | 160 | 2 | 20,8 |
| Control | 298-15-2i | 160 | 1 | 10,5 |
| Control | 298-16-1i | 160 | 1 | 13   |
| Control | 298-17-1i | 160 | 5 | 51,1 |
| Control | 298-18-1i | 160 | 0 | 11,4 |
| Control | 308-17-1i | 160 | 1 | 21,4 |
| Control | 308-18-1i | 160 | 1 | 10,3 |
| Control | 308-18-2i | 160 | 2 | 56,2 |
| Control | 308-21-1i | 160 | 1 | 20   |
| Control | 308-21-2i | 160 | 1 | 10,2 |
| Control | 215-16-1i | 170 | 0 | 1    |
| Control | 216-12-1i | 170 | 1 | 11   |
| Control | 216-22-1i | 170 | 1 | 10,2 |
| Control | 216-6-1i  | 170 | 1 | 22,1 |
| Control | 216-8-1i  | 170 | 2 | 27,6 |
| Control | 219-10-1i | 170 | 3 | 29,5 |
| Control | 219-14-1i | 170 | 4 | 48,2 |
| Control | 219-15-1i | 170 | 0 | 10,1 |
| Control | 219-17-1i | 170 | 1 | 11,7 |
| Control | 297-19-1i | 170 | 4 | 55,5 |
| Control | 297-19-2i | 170 | 1 | 10,3 |
| Control | 297-20-1i | 170 | 2 | 16,8 |
| Control | 297-22-1i | 170 | 2 | 22,4 |
| Control | 298-15-2i | 170 | 1 | 10,4 |
| Control | 298-16-1i | 170 | 1 | 24,6 |
| Control | 298-17-1i | 170 | 6 | 60,2 |
| Control | 308-17-1i | 170 | 1 | 10,9 |
| Control | 308-18-1i | 170 | 1 | 10,1 |
| Control | 308-18-2i | 170 | 2 | 21,8 |
| Control | 308-21-1i | 170 | 0 | 1,5  |
| Control | 308-21-2i | 170 | 1 | 10,8 |
| Control | 216-12-1i | 180 | 1 | 10,2 |
| Control | 216-22-1i | 180 | 1 | 11,9 |
| Control | 216-6-1i  | 180 | 1 | 11   |
| Control | 216-8-1i  | 180 | 3 | 39,2 |
| Control | 219-10-1i | 180 | 2 | 56,9 |
| Control | 219-14-1i | 180 | 1 | 37,8 |
| Control | 219-17-1i | 180 | 1 | 10,8 |
| Control | 297-19-1i | 180 | 5 | 87   |
| Control | 297-19-2i | 180 | 1 | 10,1 |
| Control | 297-20-1i | 180 | 1 | 29   |
| Control | 297-22-1i | 180 | 2 | 25,3 |
| Control | 298-15-2i | 180 | 1 | 10,3 |
| Control | 298-16-1i | 180 | 2 | 18,5 |
| Control | 298-17-1i | 180 | 5 | 71,6 |

|         |           |     |   |      |
|---------|-----------|-----|---|------|
| Control | 308-17-1i | 180 | 2 | 30   |
| Control | 308-18-1i | 180 | 1 | 12,8 |
| Control | 308-18-2i | 180 | 2 | 60,2 |
| Control | 308-21-2i | 180 | 1 | 10,8 |
| Control | 216-12-1i | 190 | 2 | 20,1 |
| Control | 216-22-1i | 190 | 1 | 10,7 |
| Control | 216-6-1i  | 190 | 1 | 10,3 |
| Control | 216-8-1i  | 190 | 2 | 29,7 |
| Control | 219-10-1i | 190 | 4 | 77,6 |
| Control | 219-14-1i | 190 | 2 | 18,5 |
| Control | 219-17-1i | 190 | 1 | 48,1 |
| Control | 297-19-1i | 190 | 4 | 70,2 |
| Control | 297-19-2i | 190 | 1 | 10,2 |
| Control | 297-20-1i | 190 | 0 | 9,7  |
| Control | 297-22-1i | 190 | 3 | 34,1 |
| Control | 298-15-2i | 190 | 0 | 8,7  |
| Control | 298-16-1i | 190 | 2 | 28,4 |
| Control | 298-17-1i | 190 | 4 | 73   |
| Control | 308-17-1i | 190 | 2 | 33   |
| Control | 308-18-1i | 190 | 1 | 10,6 |
| Control | 308-18-2i | 190 | 2 | 22,3 |
| Control | 308-21-2i | 190 | 1 | 12,6 |
| Control | 216-12-1i | 200 | 0 | 13,4 |
| Control | 216-22-1i | 200 | 1 | 11   |
| Control | 216-6-1i  | 200 | 0 | 6,1  |
| Control | 216-8-1i  | 200 | 0 | 20,8 |
| Control | 219-10-1i | 200 | 1 | 53,9 |
| Control | 219-14-1i | 200 | 2 | 34,5 |
| Control | 219-17-1i | 200 | 1 | 10,7 |
| Control | 297-19-1i | 200 | 2 | 49,9 |
| Control | 297-19-2i | 200 | 0 | 8    |
| Control | 297-22-1i | 200 | 3 | 32,2 |
| Control | 298-16-1i | 200 | 1 | 11,6 |
| Control | 298-17-1i | 200 | 4 | 51,7 |
| Control | 308-17-1i | 200 | 1 | 29,9 |
| Control | 308-18-1i | 200 | 1 | 11,1 |
| Control | 308-18-2i | 200 | 0 | 13   |
| Control | 308-21-2i | 200 | 0 | 0,1  |
| Control | 216-22-1i | 210 | 1 | 11   |
| Control | 219-10-1i | 210 | 2 | 27,4 |
| Control | 219-14-1i | 210 | 2 | 26,3 |
| Control | 219-17-1i | 210 | 1 | 11   |
| Control | 297-19-1i | 210 | 3 | 38,8 |
| Control | 297-22-1i | 210 | 1 | 26,1 |
| Control | 298-16-1i | 210 | 1 | 11,7 |
| Control | 298-17-1i | 210 | 2 | 27,6 |
| Control | 308-17-1i | 210 | 0 | 13,7 |
| Control | 308-18-1i | 210 | 1 | 20   |
| Control | 216-22-1i | 220 | 0 | 2,8  |
| Control | 219-10-1i | 220 | 1 | 23,4 |
| Control | 219-14-1i | 220 | 2 | 22,9 |
| Control | 219-17-1i | 220 | 1 | 11,6 |
| Control | 297-19-1i | 220 | 3 | 38,5 |
| Control | 297-22-1i | 220 | 2 | 21,3 |
| Control | 298-16-1i | 220 | 1 | 16,8 |
| Control | 298-17-1i | 220 | 2 | 23   |

|         |           |     |   |       |
|---------|-----------|-----|---|-------|
| Control | 308-18-1i | 220 | 1 | 14,1  |
| Control | 219-10-1i | 230 | 1 | 10,1  |
| Control | 219-14-1i | 230 | 2 | 24    |
| Control | 219-17-1i | 230 | 1 | 10,1  |
| Control | 297-19-1i | 230 | 2 | 33,9  |
| Control | 297-22-1i | 230 | 0 | 36,5  |
| Control | 298-16-1i | 230 | 0 | 3,1   |
| Control | 298-17-1i | 230 | 2 | 22,7  |
| Control | 308-18-1i | 230 | 1 | 13,9  |
| Control | 219-10-1i | 240 | 1 | 10    |
| Control | 219-14-1i | 240 | 1 | 19    |
| Control | 219-17-1i | 240 | 1 | 11,7  |
| Control | 297-19-1i | 240 | 1 | 30,2  |
| Control | 298-17-1i | 240 | 1 | 28,7  |
| Control | 308-18-1i | 240 | 1 | 11,6  |
| Control | 219-10-1i | 250 | 1 | 10,4  |
| Control | 219-14-1i | 250 | 1 | 10,6  |
| Control | 219-17-1i | 250 | 1 | 10,7  |
| Control | 297-19-1i | 250 | 1 | 10,1  |
| Control | 298-17-1i | 250 | 1 | 11,4  |
| Control | 308-18-1i | 250 | 1 | 20,1  |
| Control | 219-10-1i | 260 | 1 | 13,5  |
| Control | 219-14-1i | 260 | 1 | 11,9  |
| Control | 219-17-1i | 260 | 1 | 10,3  |
| Control | 297-19-1i | 260 | 1 | 11,5  |
| Control | 298-17-1i | 260 | 0 | 1,9   |
| Control | 308-18-1i | 260 | 0 | 2,2   |
| Control | 219-10-1i | 270 | 1 | 10,4  |
| Control | 219-14-1i | 270 | 1 | 10,3  |
| Control | 219-17-1i | 270 | 1 | 10,5  |
| Control | 297-19-1i | 270 | 1 | 10,6  |
| Control | 219-10-1i | 280 | 1 | 10,1  |
| Control | 219-14-1i | 280 | 1 | 12,8  |
| Control | 219-17-1i | 280 | 1 | 11    |
| Control | 297-19-1i | 280 | 1 | 13,3  |
| Control | 219-10-1i | 290 | 1 | 10    |
| Control | 219-14-1i | 290 | 1 | 10,8  |
| Control | 219-17-1i | 290 | 0 | 1,4   |
| Control | 297-19-1i | 290 | 2 | 22,7  |
| Control | 219-10-1i | 300 | 1 | 10    |
| Control | 219-14-1i | 300 | 1 | 10,5  |
| Control | 297-19-1i | 300 | 0 | 11,7  |
| Control | 219-10-1i | 310 | 1 | 11,8  |
| Control | 219-14-1i | 310 | 0 | 5,1   |
| Control | 219-10-1i | 320 | 1 | 10,4  |
| Control | 219-10-1i | 330 | 1 | 11    |
| Control | 219-10-1i | 340 | 0 | 4,9   |
| CIMT    | 211-10-1i | 150 | 2 | 116,6 |
| CIMT    | 211-13-1i | 150 | 4 | 36,5  |
| CIMT    | 211-14-1i | 150 | 1 | 11,2  |
| CIMT    | 211-15-1i | 150 | 2 | 37,3  |
| CIMT    | 212-13-1i | 150 | 2 | 37,9  |
| CIMT    | 212-13-2i | 150 | 3 | 46,7  |
| CIMT    | 212-14-1i | 150 | 1 | 10,2  |
| CIMT    | 212-14-2i | 150 | 1 | 17,6  |
| CIMT    | 212-15-1i | 150 | 2 | 26,9  |

|      |           |     |   |      |
|------|-----------|-----|---|------|
| CIMT | 218-11-1i | 150 | 1 | 11,3 |
| CIMT | 218-14-1i | 150 | 1 | 10,5 |
| CIMT | 218-16-1i | 150 | 3 | 46,4 |
| CIMT | 218-17-1i | 150 | 2 | 22,5 |
| CIMT | 218-19-1i | 150 | 1 | 10,1 |
| CIMT | 299-14-2i | 150 | 0 | 4,7  |
| CIMT | 299-15-1i | 150 | 0 | 2,6  |
| CIMT | 299-16-1i | 150 | 2 | 28,1 |
| CIMT | 299-17-1i | 150 | 3 | 40,9 |
| CIMT | 300-24-1i | 150 | 3 | 57,6 |
| CIMT | 309-15-1i | 150 | 2 | 40,6 |
| CIMT | 309-15-2i | 150 | 0 | 2,5  |
| CIMT | 309-16-1i | 150 | 2 | 32   |
| CIMT | 309-16-2i | 150 | 1 | 30   |
| CIMT | 309-17-1i | 150 | 1 | 20,6 |
| CIMT | 211-10-1i | 160 | 2 | 31,4 |
| CIMT | 211-13-1i | 160 | 3 | 61,3 |
| CIMT | 211-14-1i | 160 | 2 | 12   |
| CIMT | 211-15-1i | 160 | 2 | 27,7 |
| CIMT | 212-13-1i | 160 | 1 | 17,1 |
| CIMT | 212-13-2i | 160 | 1 | 26,1 |
| CIMT | 212-14-1i | 160 | 0 | 7,2  |
| CIMT | 212-14-2i | 160 | 1 | 11   |
| CIMT | 212-15-1i | 160 | 3 | 35,7 |
| CIMT | 218-11-1i | 160 | 1 | 11,7 |
| CIMT | 218-14-1i | 160 | 1 | 10,3 |
| CIMT | 218-16-1i | 160 | 3 | 51,1 |
| CIMT | 218-17-1i | 160 | 2 | 21,1 |
| CIMT | 218-19-1i | 160 | 1 | 10,5 |
| CIMT | 299-16-1i | 160 | 1 | 13,6 |
| CIMT | 299-17-1i | 160 | 1 | 27,7 |
| CIMT | 300-24-1i | 160 | 2 | 54   |
| CIMT | 309-15-1i | 160 | 2 | 24,9 |
| CIMT | 309-16-1i | 160 | 3 | 79   |
| CIMT | 309-16-2i | 160 | 0 | 4,4  |
| CIMT | 309-17-1i | 160 | 0 | 15,4 |
| CIMT | 211-10-1i | 170 | 2 | 26,8 |
| CIMT | 211-13-1i | 170 | 4 | 44,6 |
| CIMT | 211-14-1i | 170 | 1 | 17,7 |
| CIMT | 211-15-1i | 170 | 2 | 24   |
| CIMT | 212-13-1i | 170 | 1 | 11,5 |
| CIMT | 212-13-2i | 170 | 1 | 14   |
| CIMT | 212-14-2i | 170 | 1 | 16,9 |
| CIMT | 212-15-1i | 170 | 2 | 53,6 |
| CIMT | 218-11-1i | 170 | 1 | 10,2 |
| CIMT | 218-14-1i | 170 | 1 | 10,2 |
| CIMT | 218-16-1i | 170 | 3 | 62,1 |
| CIMT | 218-17-1i | 170 | 2 | 21,1 |
| CIMT | 218-19-1i | 170 | 1 | 10,9 |
| CIMT | 299-16-1i | 170 | 1 | 10,5 |
| CIMT | 299-17-1i | 170 | 1 | 10,2 |
| CIMT | 300-24-1i | 170 | 2 | 25   |
| CIMT | 309-15-1i | 170 | 2 | 23,8 |
| CIMT | 309-16-1i | 170 | 6 | 50,8 |
| CIMT | 211-10-1i | 180 | 2 | 21,6 |
| CIMT | 211-13-1i | 180 | 0 | 1,5  |

|      |           |     |   |      |
|------|-----------|-----|---|------|
| CIMT | 211-14-1i | 180 | 1 | 10,6 |
| CIMT | 211-15-1i | 180 | 2 | 24,8 |
| CIMT | 212-13-1i | 180 | 0 | 1,1  |
| CIMT | 212-13-2i | 180 | 0 | 8,6  |
| CIMT | 212-14-2i | 180 | 0 | 4,9  |
| CIMT | 212-15-1i | 180 | 1 | 21,4 |
| CIMT | 218-11-1i | 180 | 1 | 10,4 |
| CIMT | 218-14-1i | 180 | 1 | 10,1 |
| CIMT | 218-16-1i | 180 | 2 | 53   |
| CIMT | 218-17-1i | 180 | 2 | 20,2 |
| CIMT | 218-19-1i | 180 | 1 | 10,7 |
| CIMT | 299-16-1i | 180 | 1 | 11,8 |
| CIMT | 299-17-1i | 180 | 1 | 10,2 |
| CIMT | 300-24-1i | 180 | 1 | 19,9 |
| CIMT | 309-15-1i | 180 | 2 | 35,4 |
| CIMT | 309-16-1i | 180 | 3 | 72,2 |
| CIMT | 211-10-1i | 190 | 2 | 26,9 |
| CIMT | 211-14-1i | 190 | 0 | 14,1 |
| CIMT | 211-15-1i | 190 | 2 | 23,6 |
| CIMT | 212-15-1i | 190 | 1 | 11,2 |
| CIMT | 218-11-1i | 190 | 1 | 12,3 |
| CIMT | 218-14-1i | 190 | 1 | 10,6 |
| CIMT | 218-16-1i | 190 | 2 | 27,7 |
| CIMT | 218-17-1i | 190 | 2 | 22,1 |
| CIMT | 218-19-1i | 190 | 1 | 10,8 |
| CIMT | 299-16-1i | 190 | 0 | 4,5  |
| CIMT | 299-17-1i | 190 | 5 | 18,5 |
| CIMT | 300-24-1i | 190 | 2 | 24,8 |
| CIMT | 309-15-1i | 190 | 2 | 72,8 |
| CIMT | 309-16-1i | 190 | 2 | 29   |
| CIMT | 211-10-1i | 200 | 0 | 14,8 |
| CIMT | 211-15-1i | 200 | 2 | 26,3 |
| CIMT | 212-15-1i | 200 | 1 | 12,7 |
| CIMT | 218-11-1i | 200 | 1 | 12,4 |
| CIMT | 218-14-1i | 200 | 1 | 14,6 |
| CIMT | 218-16-1i | 200 | 2 | 26,9 |
| CIMT | 218-17-1i | 200 | 1 | 13,2 |
| CIMT | 218-19-1i | 200 | 1 | 14,1 |
| CIMT | 299-17-1i | 200 | 2 | 37,8 |
| CIMT | 300-24-1i | 200 | 1 | 18,1 |
| CIMT | 309-15-1i | 200 | 2 | 27,9 |
| CIMT | 309-16-1i | 200 | 2 | 29,9 |
| CIMT | 211-15-1i | 210 | 1 | 26,2 |
| CIMT | 212-15-1i | 210 | 0 | 7,3  |
| CIMT | 218-11-1i | 210 | 1 | 11,8 |
| CIMT | 218-14-1i | 210 | 0 | 2,2  |
| CIMT | 218-16-1i | 210 | 2 | 25,8 |
| CIMT | 218-17-1i | 210 | 1 | 10,3 |
| CIMT | 218-19-1i | 210 | 1 | 11,6 |
| CIMT | 299-17-1i | 210 | 1 | 25,3 |
| CIMT | 300-24-1i | 210 | 1 | 10,3 |
| CIMT | 309-15-1i | 210 | 2 | 28,6 |
| CIMT | 309-16-1i | 210 | 2 | 25,5 |
| CIMT | 211-15-1i | 220 | 1 | 10,2 |
| CIMT | 218-11-1i | 220 | 0 | 1,1  |
| CIMT | 218-16-1i | 220 | 2 | 25,5 |

|      |           |     |   |      |
|------|-----------|-----|---|------|
| CIMT | 218-17-1i | 220 | 1 | 10,6 |
| CIMT | 218-19-1i | 220 | 0 | 1,5  |
| CIMT | 299-17-1i | 220 | 3 | 33,4 |
| CIMT | 300-24-1i | 220 | 1 | 10,5 |
| CIMT | 309-15-1i | 220 | 2 | 33,6 |
| CIMT | 309-16-1i | 220 | 2 | 24,1 |
| CIMT | 211-15-1i | 230 | 1 | 10,5 |
| CIMT | 218-16-1i | 230 | 2 | 23,1 |
| CIMT | 218-17-1i | 230 | 1 | 11,6 |
| CIMT | 299-17-1i | 230 | 3 | 35,7 |
| CIMT | 300-24-1i | 230 | 0 | 7    |
| CIMT | 309-15-1i | 230 | 2 | 28,8 |
| CIMT | 309-16-1i | 230 | 2 | 26,4 |
| CIMT | 211-15-1i | 240 | 0 | 2,2  |
| CIMT | 218-16-1i | 240 | 2 | 21,3 |
| CIMT | 218-17-1i | 240 | 1 | 11,2 |
| CIMT | 299-17-1i | 240 | 2 | 35,3 |
| CIMT | 309-15-1i | 240 | 1 | 44,5 |
| CIMT | 309-16-1i | 240 | 2 | 28,2 |
| CIMT | 218-16-1i | 250 | 2 | 24,5 |
| CIMT | 218-17-1i | 250 | 1 | 11,4 |
| CIMT | 299-17-1i | 250 | 2 | 22,5 |
| CIMT | 309-15-1i | 250 | 2 | 19,9 |
| CIMT | 309-16-1i | 250 | 2 | 24,1 |
| CIMT | 218-16-1i | 260 | 2 | 26,7 |
| CIMT | 218-17-1i | 260 | 1 | 10,2 |
| CIMT | 299-17-1i | 260 | 2 | 22,3 |
| CIMT | 309-15-1i | 260 | 0 | 40,3 |
| CIMT | 309-16-1i | 260 | 1 | 31   |
| CIMT | 218-16-1i | 270 | 2 | 26   |
| CIMT | 218-17-1i | 270 | 2 | 28,1 |
| CIMT | 299-17-1i | 270 | 3 | 44,3 |
| CIMT | 309-16-1i | 270 | 2 | 15,1 |
| CIMT | 218-16-1i | 280 | 2 | 23,1 |
| CIMT | 218-17-1i | 280 | 1 | 18,3 |
| CIMT | 299-17-1i | 280 | 2 | 30,5 |
| CIMT | 309-16-1i | 280 | 3 | 34,8 |
| CIMT | 218-16-1i | 290 | 1 | 14   |
| CIMT | 218-17-1i | 290 | 1 | 10,5 |
| CIMT | 299-17-1i | 290 | 1 | 19,7 |
| CIMT | 309-16-1i | 290 | 1 | 28,6 |
| CIMT | 218-16-1i | 300 | 1 | 10,9 |
| CIMT | 218-17-1i | 300 | 1 | 10,4 |
| CIMT | 299-17-1i | 300 | 1 | 10,1 |
| CIMT | 309-16-1i | 300 | 0 | 6,9  |
| CIMT | 218-16-1i | 310 | 1 | 10,4 |
| CIMT | 218-17-1i | 310 | 1 | 10,2 |
| CIMT | 299-17-1i | 310 | 1 | 12,2 |
| CIMT | 218-16-1i | 320 | 1 | 10,5 |
| CIMT | 218-17-1i | 320 | 1 | 11,5 |
| CIMT | 299-17-1i | 320 | 1 | 10,2 |
| CIMT | 218-16-1i | 330 | 1 | 10,9 |
| CIMT | 218-17-1i | 330 | 1 | 10,4 |
| CIMT | 299-17-1i | 330 | 1 | 10,1 |
| CIMT | 218-16-1i | 340 | 0 | 1,8  |
| CIMT | 218-17-1i | 340 | 1 | 10,4 |

|            |           |     |   |      |
|------------|-----------|-----|---|------|
| CIMT       | 299-17-1i | 340 | 1 | 10,3 |
| CIMT       | 218-17-1i | 350 | 1 | 20   |
| CIMT       | 299-17-1i | 350 | 1 | 11,3 |
| CIMT       | 218-17-1i | 360 | 1 | 11,7 |
| CIMT       | 299-17-1i | 360 | 1 | 10,2 |
| CIMT       | 218-17-1i | 370 | 1 | 10,2 |
| CIMT       | 299-17-1i | 370 | 0 | 2,9  |
| CIMT       | 218-17-1i | 380 | 1 | 10,3 |
| CIMT       | 218-17-1i | 390 | 1 | 10,5 |
| CIMT       | 218-17-1i | 400 | 1 | 11,2 |
| CIMT       | 218-17-1i | 410 | 1 | 10,6 |
| CIMT       | 218-17-1i | 420 | 0 | 0,9  |
| CIMT+G-CSF | 213-17-1i | 150 | 1 | 56,7 |
| CIMT+G-CSF | 214-14-1i | 150 | 1 | 26,3 |
| CIMT+G-CSF | 214-17-1i | 150 | 0 | 12,1 |
| CIMT+G-CSF | 217-10-1i | 150 | 1 | 18,7 |
| CIMT+G-CSF | 217-16-1i | 150 | 3 | 37,2 |
| CIMT+G-CSF | 217-17-1i | 150 | 1 | 31,1 |
| CIMT+G-CSF | 217-6-1i  | 150 | 5 | 56   |
| CIMT+G-CSF | 217-8-1i  | 150 | 2 | 29,7 |
| CIMT+G-CSF | 304-19-1i | 150 | 1 | 12,3 |
| CIMT+G-CSF | 305-17-1i | 150 | 0 | 8,8  |
| CIMT+G-CSF | 305-19-1i | 150 | 1 | 26,7 |
| CIMT+G-CSF | 305-19-2i | 150 | 1 | 12,3 |
| CIMT+G-CSF | 213-17-1i | 160 | 1 | 10,8 |
| CIMT+G-CSF | 214-14-1i | 160 | 2 | 21,5 |
| CIMT+G-CSF | 217-10-1i | 160 | 1 | 10,7 |
| CIMT+G-CSF | 217-16-1i | 160 | 3 | 33,4 |
| CIMT+G-CSF | 217-17-1i | 160 | 1 | 10,7 |
| CIMT+G-CSF | 217-6-1i  | 160 | 5 | 59,2 |
| CIMT+G-CSF | 217-8-1i  | 160 | 3 | 29,6 |
| CIMT+G-CSF | 304-19-1i | 160 | 0 | 1,5  |
| CIMT+G-CSF | 305-19-1i | 160 | 0 | 1,4  |
| CIMT+G-CSF | 305-19-2i | 160 | 0 | 4,3  |
| CIMT+G-CSF | 213-17-1i | 170 | 0 | 5    |
| CIMT+G-CSF | 214-14-1i | 170 | 1 | 14,6 |
| CIMT+G-CSF | 217-10-1i | 170 | 1 | 11,4 |
| CIMT+G-CSF | 217-16-1i | 170 | 3 | 35   |
| CIMT+G-CSF | 217-17-1i | 170 | 1 | 14,3 |
| CIMT+G-CSF | 217-6-1i  | 170 | 3 | 53,7 |
| CIMT+G-CSF | 217-8-1i  | 170 | 1 | 19,3 |
| CIMT+G-CSF | 214-14-1i | 180 | 1 | 15,9 |
| CIMT+G-CSF | 217-10-1i | 180 | 1 | 10,8 |
| CIMT+G-CSF | 217-16-1i | 180 | 2 | 23,4 |
| CIMT+G-CSF | 217-17-1i | 180 | 1 | 10   |
| CIMT+G-CSF | 217-6-1i  | 180 | 2 | 35,5 |
| CIMT+G-CSF | 217-8-1i  | 180 | 1 | 10,4 |
| CIMT+G-CSF | 214-14-1i | 190 | 4 | 12,7 |
| CIMT+G-CSF | 217-10-1i | 190 | 1 | 10,5 |
| CIMT+G-CSF | 217-16-1i | 190 | 1 | 19,5 |
| CIMT+G-CSF | 217-17-1i | 190 | 1 | 10,6 |
| CIMT+G-CSF | 217-6-1i  | 190 | 2 | 21,8 |
| CIMT+G-CSF | 217-8-1i  | 190 | 1 | 11,7 |
| CIMT+G-CSF | 214-14-1i | 200 | 2 | 27,7 |
| CIMT+G-CSF | 217-10-1i | 200 | 1 | 10,5 |
| CIMT+G-CSF | 217-16-1i | 200 | 0 | 8,8  |

|                      |     |    |      |
|----------------------|-----|----|------|
| CIMT+G-CSF 217-17-1i | 200 | 1  | 10,2 |
| CIMT+G-CSF 217-6-1i  | 200 | 2  | 21,6 |
| CIMT+G-CSF 217-8-1i  | 200 | 1  | 10,1 |
| CIMT+G-CSF 214-14-1i | 210 | 1  | 30   |
| CIMT+G-CSF 217-10-1i | 210 | 1  | 10,3 |
| CIMT+G-CSF 217-17-1i | 210 | 1  | 12,4 |
| CIMT+G-CSF 217-6-1i  | 210 | 1  | 11,7 |
| CIMT+G-CSF 217-8-1i  | 210 | 1  | 10,5 |
| CIMT+G-CSF 214-14-1i | 220 | 1  | 11,2 |
| CIMT+G-CSF 217-10-1i | 220 | 1  | 10,6 |
| CIMT+G-CSF 217-17-1i | 220 | 0  | 0,7  |
| CIMT+G-CSF 217-6-1i  | 220 | 0  | 14,3 |
| CIMT+G-CSF 217-8-1i  | 220 | 2  | 25,8 |
| CIMT+G-CSF 214-14-1i | 230 | 3  | 20,6 |
| CIMT+G-CSF 217-10-1i | 230 | 1  | 18   |
| CIMT+G-CSF 217-8-1i  | 230 | 2  | 29,7 |
| CIMT+G-CSF 214-14-1i | 240 | 0  | 22,9 |
| CIMT+G-CSF 217-10-1i | 240 | 1  | 11,5 |
| CIMT+G-CSF 217-8-1i  | 240 | 1  | 16,1 |
| CIMT+G-CSF 217-10-1i | 250 | 1  | 10,6 |
| CIMT+G-CSF 217-8-1i  | 250 | 1  | 11,1 |
| CIMT+G-CSF 217-10-1i | 260 | 1  | 11,3 |
| CIMT+G-CSF 217-8-1i  | 260 | 0  | 1,3  |
| CIMT+G-CSF 217-10-1i | 270 | 1  | 19,3 |
| CIMT+G-CSF 217-10-1i | 280 | 1  | 10,5 |
| CIMT+G-CSF 217-10-1i | 290 | 1  | 11   |
| CIMT+G-CSF 217-10-1i | 300 | 1  | 10,5 |
| CIMT+G-CSF 217-10-1i | 310 | 0  | 7,9  |
| CIMT/G-CSF 306-17-1i | 150 | 2  | 69,8 |
| CIMT/G-CSF 306-17-2i | 150 | 1  | 11,1 |
| CIMT/G-CSF 306-18-1i | 150 | 1  | 13,9 |
| CIMT/G-CSF 306-18-2i | 150 | 1  | 10,1 |
| CIMT/G-CSF 306-18-3i | 150 | 2  | 24,1 |
| CIMT/G-CSF 311-16-1i | 150 | 2  | 26   |
| CIMT/G-CSF 311-17-1i | 150 | 4  | 59   |
| CIMT/G-CSF 311-17-2i | 150 | 2  | 30,7 |
| CIMT/G-CSF 311-18-1i | 150 | 1  | 11,4 |
| CIMT/G-CSF 311-19-1i | 150 | 11 | 120  |
| CIMT/G-CSF 313-15-1i | 150 | 3  | 43,1 |
| CIMT/G-CSF 313-17-1i | 150 | 1  | 17,8 |
| CIMT/G-CSF 313-19-1i | 150 | 1  | 22   |
| CIMT/G-CSF 313-19-2i | 150 | 2  | 37,6 |
| CIMT/G-CSF 314-16-1i | 150 | 2  | 27,5 |
| CIMT/G-CSF 314-16-2i | 150 | 1  | 12,2 |
| CIMT/G-CSF 314-17-1i | 150 | 2  | 22,7 |
| CIMT/G-CSF 314-17-2i | 150 | 2  | 37,1 |
| CIMT/G-CSF 314-18-1i | 150 | 1  | 14,7 |
| CIMT/G-CSF 315-11-1i | 150 | 1  | 21   |
| CIMT/G-CSF 315-11-2i | 150 | 1  | 35,7 |
| CIMT/G-CSF 315-14-1i | 150 | 2  | 24,3 |
| CIMT/G-CSF 306-17-1i | 160 | 3  | 31   |
| CIMT/G-CSF 306-17-2i | 160 | 1  | 10,8 |
| CIMT/G-CSF 306-18-1i | 160 | 1  | 11,4 |
| CIMT/G-CSF 306-18-2i | 160 | 1  | 10,9 |
| CIMT/G-CSF 306-18-3i | 160 | 2  | 22,4 |
| CIMT/G-CSF 311-16-1i | 160 | 2  | 21,2 |



|                      |     |   |       |
|----------------------|-----|---|-------|
| CIMT/G-CSF 311-17-1i | 160 | 3 | 80,5  |
| CIMT/G-CSF 311-17-2i | 160 | 2 | 20,9  |
| CIMT/G-CSF 311-18-1i | 160 | 1 | 10,2  |
| CIMT/G-CSF 311-19-1i | 160 | 6 | 120,1 |
| CIMT/G-CSF 313-15-1i | 160 | 4 | 55,5  |
| CIMT/G-CSF 313-17-1i | 160 | 1 | 10,5  |
| CIMT/G-CSF 313-19-1i | 160 | 1 | 10,8  |
| CIMT/G-CSF 313-19-2i | 160 | 2 | 39,3  |
| CIMT/G-CSF 314-16-1i | 160 | 1 | 14,7  |
| CIMT/G-CSF 314-16-2i | 160 | 1 | 10,6  |
| CIMT/G-CSF 314-17-1i | 160 | 1 | 17,4  |
| CIMT/G-CSF 314-17-2i | 160 | 1 | 19,8  |
| CIMT/G-CSF 314-18-1i | 160 | 2 | 15,9  |
| CIMT/G-CSF 315-11-1i | 160 | 1 | 19,4  |
| CIMT/G-CSF 315-11-2i | 160 | 1 | 10,8  |
| CIMT/G-CSF 315-14-1i | 160 | 2 | 22,1  |
| CIMT/G-CSF 306-17-1i | 170 | 2 | 31,7  |
| CIMT/G-CSF 306-17-2i | 170 | 1 | 10,6  |
| CIMT/G-CSF 306-18-1i | 170 | 1 | 10,5  |
| CIMT/G-CSF 306-18-2i | 170 | 1 | 10,7  |
| CIMT/G-CSF 306-18-3i | 170 | 2 | 21,7  |
| CIMT/G-CSF 311-16-1i | 170 | 2 | 23,6  |
| CIMT/G-CSF 311-17-1i | 170 | 3 | 39,9  |
| CIMT/G-CSF 311-17-2i | 170 | 2 | 27,7  |
| CIMT/G-CSF 311-18-1i | 170 | 1 | 14,4  |
| CIMT/G-CSF 311-19-1i | 170 | 5 | 100,1 |
| CIMT/G-CSF 313-15-1i | 170 | 3 | 53,9  |
| CIMT/G-CSF 313-17-1i | 170 | 1 | 17    |
| CIMT/G-CSF 313-19-1i | 170 | 1 | 41,1  |
| CIMT/G-CSF 313-19-2i | 170 | 3 | 35,7  |
| CIMT/G-CSF 314-16-1i | 170 | 0 | 7     |
| CIMT/G-CSF 314-16-2i | 170 | 0 | 9,9   |
| CIMT/G-CSF 314-17-1i | 170 | 1 | 12,8  |
| CIMT/G-CSF 314-17-2i | 170 | 0 | 6,8   |
| CIMT/G-CSF 314-18-1i | 170 | 3 | 39,1  |
| CIMT/G-CSF 315-11-1i | 170 | 0 | 1     |
| CIMT/G-CSF 315-11-2i | 170 | 1 | 11,7  |
| CIMT/G-CSF 315-14-1i | 170 | 2 | 21,4  |
| CIMT/G-CSF 306-17-1i | 180 | 2 | 22,4  |
| CIMT/G-CSF 306-17-2i | 180 | 1 | 13    |
| CIMT/G-CSF 306-18-1i | 180 | 1 | 10,8  |
| CIMT/G-CSF 306-18-2i | 180 | 1 | 10,6  |
| CIMT/G-CSF 306-18-3i | 180 | 1 | 19,2  |
| CIMT/G-CSF 311-16-1i | 180 | 1 | 21,1  |
| CIMT/G-CSF 311-17-1i | 180 | 2 | 26,1  |
| CIMT/G-CSF 311-17-2i | 180 | 2 | 27,5  |
| CIMT/G-CSF 311-18-1i | 180 | 1 | 10    |
| CIMT/G-CSF 311-19-1i | 180 | 4 | 88,9  |
| CIMT/G-CSF 313-15-1i | 180 | 2 | 28    |
| CIMT/G-CSF 313-17-1i | 180 | 1 | 12,2  |
| CIMT/G-CSF 313-19-1i | 180 | 1 | 10,5  |
| CIMT/G-CSF 313-19-2i | 180 | 1 | 12,3  |
| CIMT/G-CSF 314-17-1i | 180 | 1 | 12    |
| CIMT/G-CSF 314-18-1i | 180 | 1 | 33,5  |
| CIMT/G-CSF 315-11-2i | 180 | 1 | 10,8  |
| CIMT/G-CSF 315-14-1i | 180 | 0 | 11,3  |

|                      |     |   |      |
|----------------------|-----|---|------|
| CIMT/G-CSF 306-17-1i | 190 | 0 | 9,7  |
| CIMT/G-CSF 306-17-2i | 190 | 1 | 10,2 |
| CIMT/G-CSF 306-18-1i | 190 | 1 | 14   |
| CIMT/G-CSF 306-18-2i | 190 | 0 | 3,3  |
| CIMT/G-CSF 306-18-3i | 190 | 1 | 13,3 |
| CIMT/G-CSF 311-16-1i | 190 | 0 | 1,6  |
| CIMT/G-CSF 311-17-1i | 190 | 2 | 23,9 |
| CIMT/G-CSF 311-17-2i | 190 | 1 | 20,5 |
| CIMT/G-CSF 311-18-1i | 190 | 0 | 1,8  |
| CIMT/G-CSF 311-19-1i | 190 | 4 | 82,4 |
| CIMT/G-CSF 313-15-1i | 190 | 1 | 16,7 |
| CIMT/G-CSF 313-17-1i | 190 | 1 | 10,5 |
| CIMT/G-CSF 313-19-1i | 190 | 1 | 10,2 |
| CIMT/G-CSF 313-19-2i | 190 | 0 | 0    |
| CIMT/G-CSF 314-17-1i | 190 | 1 | 21,9 |
| CIMT/G-CSF 314-18-1i | 190 | 0 | 4,4  |
| CIMT/G-CSF 315-11-2i | 190 | 1 | 12   |
| CIMT/G-CSF 306-17-2i | 200 | 1 | 21,3 |
| CIMT/G-CSF 306-18-1i | 200 | 0 | 34,6 |
| CIMT/G-CSF 306-18-3i | 200 | 0 | 0,4  |
| CIMT/G-CSF 311-17-1i | 200 | 2 | 22,9 |
| CIMT/G-CSF 311-17-2i | 200 | 0 | 10,6 |
| CIMT/G-CSF 311-19-1i | 200 | 5 | 69,1 |
| CIMT/G-CSF 313-15-1i | 200 | 1 | 10,3 |
| CIMT/G-CSF 313-17-1i | 200 | 2 | 17,1 |
| CIMT/G-CSF 313-19-1i | 200 | 1 | 14,4 |
| CIMT/G-CSF 314-17-1i | 200 | 1 | 16,2 |
| CIMT/G-CSF 315-11-2i | 200 | 1 | 10,7 |
| CIMT/G-CSF 306-17-2i | 210 | 0 | 6,4  |
| CIMT/G-CSF 311-17-1i | 210 | 2 | 25   |
| CIMT/G-CSF 311-19-1i | 210 | 5 | 70,6 |
| CIMT/G-CSF 313-15-1i | 210 | 1 | 14,5 |
| CIMT/G-CSF 313-17-1i | 210 | 2 | 20,8 |
| CIMT/G-CSF 313-19-1i | 210 | 1 | 13,4 |
| CIMT/G-CSF 314-17-1i | 210 | 1 | 12,5 |
| CIMT/G-CSF 315-11-2i | 210 | 0 | 3,6  |
| CIMT/G-CSF 311-17-1i | 220 | 1 | 15,6 |
| CIMT/G-CSF 311-19-1i | 220 | 3 | 48,9 |
| CIMT/G-CSF 313-15-1i | 220 | 1 | 12,7 |
| CIMT/G-CSF 313-17-1i | 220 | 2 | 21,9 |
| CIMT/G-CSF 313-19-1i | 220 | 1 | 10,1 |
| CIMT/G-CSF 314-17-1i | 220 | 0 | 6,3  |
| CIMT/G-CSF 311-17-1i | 230 | 3 | 52,1 |
| CIMT/G-CSF 311-19-1i | 230 | 3 | 43,1 |
| CIMT/G-CSF 313-15-1i | 230 | 1 | 11,4 |
| CIMT/G-CSF 313-17-1i | 230 | 2 | 22,4 |
| CIMT/G-CSF 313-19-1i | 230 | 1 | 10,1 |
| CIMT/G-CSF 311-17-1i | 240 | 1 | 43   |
| CIMT/G-CSF 311-19-1i | 240 | 3 | 41,9 |
| CIMT/G-CSF 313-15-1i | 240 | 1 | 11,3 |
| CIMT/G-CSF 313-17-1i | 240 | 1 | 20   |
| CIMT/G-CSF 313-19-1i | 240 | 1 | 11,6 |
| CIMT/G-CSF 311-17-1i | 250 | 1 | 10,2 |
| CIMT/G-CSF 311-19-1i | 250 | 2 | 49,7 |
| CIMT/G-CSF 313-15-1i | 250 | 1 | 37   |
| CIMT/G-CSF 313-17-1i | 250 | 1 | 10,1 |

|                      |     |   |      |
|----------------------|-----|---|------|
| CIMT/G-CSF 313-19-1i | 250 | 1 | 11,9 |
| CIMT/G-CSF 311-17-1i | 260 | 1 | 16,6 |
| CIMT/G-CSF 311-19-1i | 260 | 3 | 28,3 |
| CIMT/G-CSF 313-15-1i | 260 | 1 | 11   |
| CIMT/G-CSF 313-17-1i | 260 | 1 | 10,1 |
| CIMT/G-CSF 313-19-1i | 260 | 3 | 30,7 |
| CIMT/G-CSF 311-17-1i | 270 | 1 | 10,9 |
| CIMT/G-CSF 311-19-1i | 270 | 2 | 75,5 |
| CIMT/G-CSF 313-15-1i | 270 | 1 | 10,2 |
| CIMT/G-CSF 313-17-1i | 270 | 0 | 5,7  |
| CIMT/G-CSF 313-19-1i | 270 | 3 | 38,1 |
| CIMT/G-CSF 311-17-1i | 280 | 2 | 28,5 |
| CIMT/G-CSF 311-19-1i | 280 | 2 | 22,6 |
| CIMT/G-CSF 313-15-1i | 280 | 1 | 10,2 |
| CIMT/G-CSF 313-19-1i | 280 | 3 | 38,4 |
| CIMT/G-CSF 311-17-1i | 290 | 1 | 24   |
| CIMT/G-CSF 311-19-1i | 290 | 0 | 17,9 |
| CIMT/G-CSF 313-15-1i | 290 | 1 | 10,1 |
| CIMT/G-CSF 313-19-1i | 290 | 1 | 29,6 |
| CIMT/G-CSF 311-17-1i | 300 | 1 | 20,5 |
| CIMT/G-CSF 313-15-1i | 300 | 1 | 10,8 |
| CIMT/G-CSF 313-19-1i | 300 | 1 | 11,2 |
| CIMT/G-CSF 311-17-1i | 310 | 1 | 14,3 |
| CIMT/G-CSF 313-15-1i | 310 | 1 | 10,1 |
| CIMT/G-CSF 313-19-1i | 310 | 1 | 13,7 |
| CIMT/G-CSF 311-17-1i | 320 | 0 | 0,8  |
| CIMT/G-CSF 313-15-1i | 320 | 0 | 7,8  |
| CIMT/G-CSF 313-19-1i | 320 | 1 | 12,8 |
| CIMT/G-CSF 313-19-1i | 330 | 1 | 11   |
| CIMT/G-CSF 313-19-1i | 340 | 1 | 10,3 |
| CIMT/G-CSF 313-19-1i | 350 | 1 | 15,6 |
| CIMT/G-CSF 313-19-1i | 360 | 0 | 5,8  |
| G-CSF 220-17-1i      | 150 | 2 | 24,3 |
| G-CSF 220-18-1i      | 150 | 1 | 11,2 |
| G-CSF 220-19-1i      | 150 | 0 | 29,9 |
| G-CSF 220-7-1i       | 150 | 1 | 11,5 |
| G-CSF 221-13-1i      | 150 | 1 | 11   |
| G-CSF 221-16-1i      | 150 | 2 | 34,7 |
| G-CSF 221-19-1i      | 150 | 5 | 73,7 |
| G-CSF 221-22-1i      | 150 | 1 | 29,3 |
| G-CSF 221-6-1i       | 150 | 1 | 10,5 |
| G-CSF 222-16-1i      | 150 | 1 | 10,6 |
| G-CSF 222-17-1i      | 150 | 1 | 35,5 |
| G-CSF 222-21-1i      | 150 | 2 | 21,9 |
| G-CSF 222-23-1i      | 150 | 1 | 10,2 |
| G-CSF 222-8-1i       | 150 | 1 | 12,6 |
| G-CSF 301-18-1i      | 150 | 1 | 10,1 |
| G-CSF 301-19-1i      | 150 | 2 | 21,6 |
| G-CSF 301-20-1i      | 150 | 1 | 11,4 |
| G-CSF 301-20-2i      | 150 | 1 | 12,2 |
| G-CSF 301-20-3i      | 150 | 4 | 67,5 |
| G-CSF 302-16-1i      | 150 | 1 | 10,6 |
| G-CSF 302-17-2i      | 150 | 1 | 10,6 |
| G-CSF 302-18-1i      | 150 | 1 | 12,1 |
| G-CSF 303-15-1i      | 150 | 2 | 21,5 |
| G-CSF 303-16-1i      | 150 | 3 | 32,6 |

|       |           |     |   |      |
|-------|-----------|-----|---|------|
| G-CSF | 303-16-2i | 150 | 1 | 27   |
| G-CSF | 220-17-1i | 160 | 1 | 17,1 |
| G-CSF | 220-18-1i | 160 | 1 | 10,5 |
| G-CSF | 220-7-1i  | 160 | 1 | 10,2 |
| G-CSF | 221-13-1i | 160 | 1 | 14,3 |
| G-CSF | 221-16-1i | 160 | 2 | 22,6 |
| G-CSF | 221-19-1i | 160 | 3 | 55,3 |
| G-CSF | 221-22-1i | 160 | 2 | 21   |
| G-CSF | 221-6-1i  | 160 | 1 | 11,2 |
| G-CSF | 222-16-1i | 160 | 1 | 11   |
| G-CSF | 222-17-1i | 160 | 1 | 10,5 |
| G-CSF | 222-21-1i | 160 | 2 | 23,6 |
| G-CSF | 222-23-1i | 160 | 1 | 69   |
| G-CSF | 222-8-1i  | 160 | 1 | 11,7 |
| G-CSF | 301-18-1i | 160 | 2 | 31,4 |
| G-CSF | 301-19-1i | 160 | 0 | 16,4 |
| G-CSF | 301-20-1i | 160 | 1 | 10,1 |
| G-CSF | 301-20-2i | 160 | 1 | 10,7 |
| G-CSF | 301-20-3i | 160 | 1 | 32,2 |
| G-CSF | 302-16-1i | 160 | 0 | 7,5  |
| G-CSF | 302-17-2i | 160 | 1 | 10,5 |
| G-CSF | 302-18-1i | 160 | 0 | 2,9  |
| G-CSF | 303-15-1i | 160 | 1 | 12,5 |
| G-CSF | 303-16-1i | 160 | 1 | 23   |
| G-CSF | 303-16-2i | 160 | 1 | 12,4 |
| G-CSF | 220-17-1i | 170 | 1 | 10,2 |
| G-CSF | 220-18-1i | 170 | 1 | 52,2 |
| G-CSF | 220-7-1i  | 170 | 1 | 11,1 |
| G-CSF | 221-13-1i | 170 | 1 | 13,1 |
| G-CSF | 221-16-1i | 170 | 2 | 36,3 |
| G-CSF | 221-19-1i | 170 | 1 | 15,8 |
| G-CSF | 221-22-1i | 170 | 2 | 34,5 |
| G-CSF | 221-6-1i  | 170 | 1 | 10,7 |
| G-CSF | 222-16-1i | 170 | 1 | 12,3 |
| G-CSF | 222-17-1i | 170 | 1 | 10,7 |
| G-CSF | 222-21-1i | 170 | 1 | 20,6 |
| G-CSF | 222-23-1i | 170 | 1 | 10,3 |
| G-CSF | 222-8-1i  | 170 | 1 | 12,1 |
| G-CSF | 301-18-1i | 170 | 2 | 30,1 |
| G-CSF | 301-20-1i | 170 | 1 | 10   |
| G-CSF | 301-20-2i | 170 | 1 | 10,1 |
| G-CSF | 301-20-3i | 170 | 1 | 10,5 |
| G-CSF | 302-17-2i | 170 | 0 | 3,1  |
| G-CSF | 303-15-1i | 170 | 0 | 2,4  |
| G-CSF | 303-16-1i | 170 | 1 | 11,5 |
| G-CSF | 303-16-2i | 170 | 1 | 10,8 |
| G-CSF | 220-17-1i | 180 | 2 | 16,5 |
| G-CSF | 220-18-1i | 180 | 1 | 11,9 |
| G-CSF | 220-7-1i  | 180 | 0 | 5,8  |
| G-CSF | 221-13-1i | 180 | 0 | 4,3  |
| G-CSF | 221-16-1i | 180 | 1 | 18,9 |
| G-CSF | 221-19-1i | 180 | 1 | 11   |
| G-CSF | 221-22-1i | 180 | 2 | 21,8 |
| G-CSF | 221-6-1i  | 180 | 1 | 10,4 |
| G-CSF | 222-16-1i | 180 | 0 | 19,6 |
| G-CSF | 222-17-1i | 180 | 1 | 10,4 |

|       |           |     |   |      |
|-------|-----------|-----|---|------|
| G-CSF | 222-21-1i | 180 | 1 | 11,4 |
| G-CSF | 222-23-1i | 180 | 1 | 13,8 |
| G-CSF | 222-8-1i  | 180 | 1 | 14,8 |
| G-CSF | 301-18-1i | 180 | 2 | 23,3 |
| G-CSF | 301-20-1i | 180 | 1 | 10,6 |
| G-CSF | 301-20-2i | 180 | 1 | 10,4 |
| G-CSF | 301-20-3i | 180 | 1 | 12,6 |
| G-CSF | 303-16-1i | 180 | 1 | 12,2 |
| G-CSF | 303-16-2i | 180 | 1 | 14,3 |
| G-CSF | 220-17-1i | 190 | 3 | 45,5 |
| G-CSF | 220-18-1i | 190 | 0 | 4    |
| G-CSF | 221-16-1i | 190 | 1 | 13,3 |
| G-CSF | 221-19-1i | 190 | 1 | 10,2 |
| G-CSF | 221-22-1i | 190 | 2 | 20,6 |
| G-CSF | 221-6-1i  | 190 | 1 | 10,3 |
| G-CSF | 222-17-1i | 190 | 1 | 11   |
| G-CSF | 222-21-1i | 190 | 1 | 10,3 |
| G-CSF | 222-23-1i | 190 | 1 | 10,3 |
| G-CSF | 222-8-1i  | 190 | 0 | 6    |
| G-CSF | 301-18-1i | 190 | 2 | 45,8 |
| G-CSF | 301-20-1i | 190 | 1 | 11,1 |
| G-CSF | 301-20-2i | 190 | 1 | 12   |
| G-CSF | 301-20-3i | 190 | 1 | 10,7 |
| G-CSF | 303-16-1i | 190 | 1 | 12,1 |
| G-CSF | 303-16-2i | 190 | 1 | 10,6 |
| G-CSF | 220-17-1i | 200 | 1 | 36   |
| G-CSF | 221-16-1i | 200 | 1 | 11,5 |
| G-CSF | 221-19-1i | 200 | 1 | 10,6 |
| G-CSF | 221-22-1i | 200 | 2 | 21,1 |
| G-CSF | 221-6-1i  | 200 | 1 | 13,2 |
| G-CSF | 222-17-1i | 200 | 1 | 10,3 |
| G-CSF | 222-21-1i | 200 | 0 | 2,6  |
| G-CSF | 222-23-1i | 200 | 2 | 17   |
| G-CSF | 301-18-1i | 200 | 2 | 23,1 |
| G-CSF | 301-20-1i | 200 | 1 | 10,1 |
| G-CSF | 301-20-2i | 200 | 1 | 10,5 |
| G-CSF | 301-20-3i | 200 | 1 | 10,9 |
| G-CSF | 303-16-1i | 200 | 0 | 0,7  |
| G-CSF | 303-16-2i | 200 | 0 | 0    |
| G-CSF | 220-17-1i | 210 | 1 | 10,9 |
| G-CSF | 221-16-1i | 210 | 1 | 12   |
| G-CSF | 221-19-1i | 210 | 0 | 4,8  |
| G-CSF | 221-22-1i | 210 | 1 | 17,5 |
| G-CSF | 221-6-1i  | 210 | 0 | 7,4  |
| G-CSF | 222-17-1i | 210 | 1 | 12,6 |
| G-CSF | 222-23-1i | 210 | 2 | 65,3 |
| G-CSF | 301-18-1i | 210 | 1 | 24,3 |
| G-CSF | 301-20-1i | 210 | 1 | 10,1 |
| G-CSF | 301-20-2i | 210 | 1 | 10,8 |
| G-CSF | 301-20-3i | 210 | 1 | 10,5 |
| G-CSF | 220-17-1i | 220 | 1 | 12,5 |
| G-CSF | 221-16-1i | 220 | 1 | 17,3 |
| G-CSF | 221-22-1i | 220 | 1 | 11,9 |
| G-CSF | 222-17-1i | 220 | 0 | 1,3  |
| G-CSF | 222-23-1i | 220 | 2 | 40,9 |
| G-CSF | 301-18-1i | 220 | 1 | 10,2 |

|       |           |     |   |      |
|-------|-----------|-----|---|------|
| G-CSF | 301-20-1i | 220 | 1 | 10,4 |
| G-CSF | 301-20-2i | 220 | 0 | 0,4  |
| G-CSF | 301-20-3i | 220 | 0 | 4,9  |
| G-CSF | 220-17-1i | 230 | 1 | 11,1 |
| G-CSF | 221-16-1i | 230 | 1 | 14,1 |
| G-CSF | 221-22-1i | 230 | 1 | 13,3 |
| G-CSF | 222-23-1i | 230 | 2 | 31,7 |
| G-CSF | 301-18-1i | 230 | 1 | 12   |
| G-CSF | 301-20-1i | 230 | 0 | 2,8  |
| G-CSF | 220-17-1i | 240 | 1 | 11,2 |
| G-CSF | 221-16-1i | 240 | 1 | 23,2 |
| G-CSF | 221-22-1i | 240 | 1 | 10,8 |
| G-CSF | 222-23-1i | 240 | 1 | 24,3 |
| G-CSF | 301-18-1i | 240 | 1 | 11,4 |
| G-CSF | 220-17-1i | 250 | 1 | 10,6 |
| G-CSF | 221-16-1i | 250 | 0 | 18,2 |
| G-CSF | 221-22-1i | 250 | 1 | 13,4 |
| G-CSF | 222-23-1i | 250 | 0 | 2,8  |
| G-CSF | 301-18-1i | 250 | 1 | 10,7 |
| G-CSF | 220-17-1i | 260 | 1 | 10,7 |
| G-CSF | 221-22-1i | 260 | 0 | 13,7 |
| G-CSF | 301-18-1i | 260 | 1 | 13,2 |
| G-CSF | 220-17-1i | 270 | 0 | 5,6  |
| G-CSF | 301-18-1i | 270 | 0 | 9,9  |

basilar dendrite Sholl 10 $\mu$ m

| Group   | Number    | Radius( $\mu$ m) | Intersections | Length( $\mu$ m) |
|---------|-----------|------------------|---------------|------------------|
| Control | 215-11-1i | 10               | 4             | 4                |
| Control | 215-15-1i | 10               | 7             | 9,1              |
| Control | 215-16-1i | 10               | 3             | 7                |
| Control | 215-18-1i | 10               | 5             | 10,4             |
| Control | 215-9-1i  | 10               | 3             | 8,6              |
| Control | 216-12-1i | 10               | 6             | 11,6             |
| Control | 216-18-1i | 10               | 4             | 6,4              |
| Control | 216-19-1i | 10               | 2             | 0,9              |
| Control | 216-22-1i | 10               | 2             | 3,9              |
| Control | 216-6-1i  | 10               | 0             | 0                |
| Control | 216-8-1i  | 10               | 2             | 4,1              |
| Control | 219-10-1i | 10               | 0             | 0                |
| Control | 219-14-1i | 10               | 0             | 0                |
| Control | 219-15-1i | 10               | 0             | 0                |
| Control | 219-17-1i | 10               | 0             | 0                |
| Control | 219-21-1i | 10               | 0             | 0                |
| Control | 297-19-1i | 10               | 0             | 0                |
| Control | 297-19-2i | 10               | 5             | 8,4              |
| Control | 297-20-1i | 10               | 1             | 2,2              |
| Control | 297-22-1i | 10               | 0             | 0                |
| Control | 297-22-2i | 10               | 0             | 0                |
| Control | 298-15-1i | 10               | 2             | 5,6              |
| Control | 298-15-2i | 10               | 1             | 0,1              |
| Control | 298-16-1i | 10               | 0             | 0                |
| Control | 298-17-1i | 10               | 0             | 0                |
| Control | 298-18-1i | 10               | 0             | 0                |
| Control | 308-17-1i | 10               | 0             | 0                |

|            |           |    |   |      |
|------------|-----------|----|---|------|
| Control    | 308-18-1i | 10 | 1 | 0    |
| Control    | 308-18-2i | 10 | 2 | 5,4  |
| Control    | 308-21-1i | 10 | 3 | 5,3  |
| Control    | 308-21-2i | 10 | 0 | 0    |
| CIMT       | 211-10-1i | 10 | 0 | 0    |
| CIMT       | 211-13-1i | 10 | 4 | 5,9  |
| CIMT       | 211-13-2i | 10 | 1 | 4,2  |
| CIMT       | 211-14-1i | 10 | 1 | 3,1  |
| CIMT       | 211-14-2i | 10 | 1 | 3,1  |
| CIMT       | 211-15-1i | 10 | 1 | 0,4  |
| CIMT       | 211-15-2i | 10 | 3 | 9,9  |
| CIMT       | 212-13-1i | 10 | 1 | 1    |
| CIMT       | 212-13-2i | 10 | 0 | 0    |
| CIMT       | 212-14-1i | 10 | 6 | 9,1  |
| CIMT       | 212-14-2i | 10 | 6 | 9,4  |
| CIMT       | 212-15-1i | 10 | 5 | 8,8  |
| CIMT       | 299-14-1i | 10 | 3 | 13,1 |
| CIMT       | 299-14-2i | 10 | 3 | 2,9  |
| CIMT       | 299-15-1i | 10 | 4 | 13,1 |
| CIMT       | 299-16-1i | 10 | 2 | 4,5  |
| CIMT       | 299-17-1i | 10 | 4 | 3,9  |
| CIMT       | 300-16-1i | 10 | 0 | 0    |
| CIMT       | 300-20-1i | 10 | 5 | 7,9  |
| CIMT       | 300-22-1i | 10 | 2 | 7,1  |
| CIMT       | 300-24-1i | 10 | 0 | 0    |
| CIMT       | 300-24-2i | 10 | 1 | 3,7  |
| CIMT       | 309-15-1i | 10 | 1 | 0,1  |
| CIMT       | 309-15-2i | 10 | 4 | 5    |
| CIMT       | 309-16-1i | 10 | 7 | 13,2 |
| CIMT       | 309-16-2i | 10 | 2 | 5,4  |
| CIMT       | 309-17-1i | 10 | 2 | 3,2  |
| CIMT       | 218-11-1i | 10 | 2 | 2,9  |
| CIMT       | 218-14-1i | 10 | 2 | 1    |
| CIMT       | 218-16-1i | 10 | 0 | 0    |
| CIMT       | 218-17-1i | 10 | 0 | 0    |
| CIMT       | 218-19-1i | 10 | 1 | 1,1  |
| CIMT+G-CSF | 213-12-1i | 10 | 6 | 11,1 |
| CIMT+G-CSF | 213-14-1i | 10 | 7 | 23,7 |
| CIMT+G-CSF | 213-17-1i | 10 | 9 | 18,5 |
| CIMT+G-CSF | 213-18-1i | 10 | 8 | 23,8 |
| CIMT+G-CSF | 213-8-1i  | 10 | 4 | 8    |
| CIMT+G-CSF | 214-14-1i | 10 | 3 | 10,9 |
| CIMT+G-CSF | 214-14-2i | 10 | 2 | 2,3  |
| CIMT+G-CSF | 214-17-1i | 10 | 1 | 1    |
| CIMT+G-CSF | 214-18-1i | 10 | 4 | 8,8  |
| CIMT+G-CSF | 214-19-1i | 10 | 1 | 2,1  |
| CIMT+G-CSF | 217-10-1i | 10 | 6 | 17,8 |
| CIMT+G-CSF | 217-16-1i | 10 | 0 | 0    |
| CIMT+G-CSF | 217-17-1i | 10 | 0 | 0    |
| CIMT+G-CSF | 217-6-1i  | 10 | 2 | 1,8  |
| CIMT+G-CSF | 217-8-1i  | 10 | 0 | 0    |
| CIMT+G-CSF | 304-17-1i | 10 | 0 | 0    |
| CIMT+G-CSF | 304-19-1i | 10 | 3 | 4,6  |
| CIMT+G-CSF | 304-19-2i | 10 | 3 | 12,7 |
| CIMT+G-CSF | 304-20-1i | 10 | 0 | 0    |
| CIMT+G-CSF | 304-21-1i | 10 | 3 | 2,3  |

|                      |    |   |      |
|----------------------|----|---|------|
| CIMT+G-CSF 304-21-2i | 10 | 5 | 16,7 |
| CIMT+G-CSF 304-22-1i | 10 | 5 | 17,7 |
| CIMT+G-CSF 305-17-1i | 10 | 4 | 15,1 |
| CIMT+G-CSF 305-17-2i | 10 | 2 | 2,1  |
| CIMT+G-CSF 305-18-1i | 10 | 3 | 4    |
| CIMT+G-CSF 305-19-1i | 10 | 5 | 15,6 |
| CIMT+G-CSF 305-19-2i | 10 | 0 | 0    |
| CIMT/G-CSF 306-17-1i | 10 | 0 | 0    |
| CIMT/G-CSF 306-17-2i | 10 | 7 | 9    |
| CIMT/G-CSF 306-18-1i | 10 | 4 | 7,6  |
| CIMT/G-CSF 306-18-2i | 10 | 3 | 5    |
| CIMT/G-CSF 306-18-3i | 10 | 4 | 6,1  |
| CIMT/G-CSF 311-16-1i | 10 | 3 | 12   |
| CIMT/G-CSF 311-17-1i | 10 | 1 | 0,7  |
| CIMT/G-CSF 311-17-2i | 10 | 2 | 1,6  |
| CIMT/G-CSF 311-18-1i | 10 | 0 | 0    |
| CIMT/G-CSF 311-19-1i | 10 | 2 | 3,3  |
| CIMT/G-CSF 313-14.1i | 10 | 8 | 33,9 |
| CIMT/G-CSF 313-15-1i | 10 | 0 | 0    |
| CIMT/G-CSF 313-17-1i | 10 | 1 | 0,7  |
| CIMT/G-CSF 313-19-1i | 10 | 2 | 3    |
| CIMT/G-CSF 313-19-2i | 10 | 1 | 2,7  |
| CIMT/G-CSF 314-16-1i | 10 | 3 | 2,1  |
| CIMT/G-CSF 314-16-2i | 10 | 2 | 3,6  |
| CIMT/G-CSF 314-17-1i | 10 | 1 | 3,6  |
| CIMT/G-CSF 314-17-2i | 10 | 3 | 3,7  |
| CIMT/G-CSF 314-18-1i | 10 | 3 | 7,5  |
| CIMT/G-CSF 315-11-1i | 10 | 3 | 1,7  |
| CIMT/G-CSF 315-11-2i | 10 | 1 | 3,1  |
| CIMT/G-CSF 315-13-1i | 10 | 6 | 21,5 |
| CIMT/G-CSF 315-13-2i | 10 | 2 | 5,4  |
| CIMT/G-CSF 315-14-1i | 10 | 0 | 0    |
| CIMT/G-CSF 315-14-2i | 10 | 4 | 11,2 |
| G-CSF 220-16-1i      | 10 | 2 | 2,7  |
| G-CSF 220-17-1i      | 10 | 4 | 8,7  |
| G-CSF 220-18-1i      | 10 | 0 | 0    |
| G-CSF 220-19-1i      | 10 | 0 | 0    |
| G-CSF 220-7-1i       | 10 | 0 | 0    |
| G-CSF 221-13-1i      | 10 | 4 | 9,4  |
| G-CSF 221-16-1i      | 10 | 0 | 0    |
| G-CSF 221-19-1i      | 10 | 0 | 0    |
| G-CSF 221-22-1i      | 10 | 0 | 0    |
| G-CSF 221-6-1i       | 10 | 0 | 0    |
| G-CSF 222-16-1i      | 10 | 0 | 0    |
| G-CSF 222-17-1i      | 10 | 2 | 2,1  |
| G-CSF 222-21-1i      | 10 | 0 | 0    |
| G-CSF 222-23-1i      | 10 | 1 | 0,2  |
| G-CSF 222-8-1i       | 10 | 1 | 0,4  |
| G-CSF 301-18-1i      | 10 | 2 | 7,7  |
| G-CSF 301-19-1i      | 10 | 4 | 7    |
| G-CSF 301-20-1i      | 10 | 1 | 2,6  |
| G-CSF 301-20-2i      | 10 | 0 | 0    |
| G-CSF 301-20-3i      | 10 | 1 | 4,6  |
| G-CSF 302-16-1i      | 10 | 4 | 5,8  |
| G-CSF 302-16-2i      | 10 | 5 | 17   |
| G-CSF 302-17-1i      | 10 | 5 | 18,8 |



|       |           |    |   |      |
|-------|-----------|----|---|------|
| G-CSF | 302-17-2i | 10 | 6 | 17,2 |
| G-CSF | 302-18-1i | 10 | 4 | 5,5  |
| G-CSF | 303-15-1i | 10 | 1 | 2,2  |
| G-CSF | 303-16-1i | 10 | 1 | 0,8  |
| G-CSF | 303-16-2i | 10 | 6 | 12,1 |
| G-CSF | 303-17-1i | 10 | 2 | 5,5  |
| G-CSF | 303-17-2i | 10 | 5 | 9,6  |

basilar dendrite Sholl 20 $\mu$ m

| Group   | Number    | Radius( $\mu$ m) | Intersections | Length( $\mu$ m) |
|---------|-----------|------------------|---------------|------------------|
| Control | 215-11-1i | 20               | 6             | 84,1             |
| Control | 215-15-1i | 20               | 14            | 165,5            |
| Control | 215-16-1i | 20               | 10            | 98,1             |
| Control | 215-18-1i | 20               | 8             | 134,9            |
| Control | 215-9-1i  | 20               | 8             | 104,1            |
| Control | 216-12-1i | 20               | 7             | 93,3             |
| Control | 216-18-1i | 20               | 7             | 97,4             |
| Control | 216-19-1i | 20               | 9             | 82,5             |
| Control | 216-22-1i | 20               | 5             | 70,1             |
| Control | 216-6-1i  | 20               | 3             | 13,8             |
| Control | 216-8-1i  | 20               | 8             | 92,7             |
| Control | 219-10-1i | 20               | 3             | 49,7             |
| Control | 219-14-1i | 20               | 6             | 43,2             |
| Control | 219-15-1i | 20               | 10            | 97,8             |
| Control | 219-17-1i | 20               | 1             | 0,7              |
| Control | 219-21-1i | 20               | 6             | 58,7             |
| Control | 297-19-1i | 20               | 9             | 73,1             |
| Control | 297-19-2i | 20               | 7             | 82,8             |
| Control | 297-20-1i | 20               | 4             | 42,8             |
| Control | 297-22-1i | 20               | 6             | 66,2             |
| Control | 297-22-2i | 20               | 4             | 33               |
| Control | 298-15-1i | 20               | 11            | 104              |
| Control | 298-15-2i | 20               | 3             | 30,9             |
| Control | 298-16-1i | 20               | 0             | 0                |
| Control | 298-17-1i | 20               | 7             | 65,9             |
| Control | 298-18-1i | 20               | 7             | 76,9             |
| Control | 308-17-1i | 20               | 9             | 79               |
| Control | 308-18-1i | 20               | 4             | 46,9             |
| Control | 308-18-2i | 20               | 13            | 177,7            |
| Control | 308-21-1i | 20               | 5             | 80,8             |
| Control | 308-21-2i | 20               | 9             | 89,4             |
| CIMT    | 211-10-1i | 20               | 2             | 10,3             |
| CIMT    | 211-13-1i | 20               | 8             | 76,7             |
| CIMT    | 211-13-2i | 20               | 6             | 60,1             |
| CIMT    | 211-14-1i | 20               | 6             | 62,4             |
| CIMT    | 211-14-2i | 20               | 10            | 86,6             |
| CIMT    | 211-15-1i | 20               | 7             | 50,1             |
| CIMT    | 211-15-2i | 20               | 7             | 89,4             |
| CIMT    | 212-13-1i | 20               | 4             | 59,5             |
| CIMT    | 212-13-2i | 20               | 5             | 49,5             |
| CIMT    | 212-14-1i | 20               | 6             | 67,2             |
| CIMT    | 212-14-2i | 20               | 9             | 114,5            |
| CIMT    | 212-15-1i | 20               | 4             | 41,1             |
| CIMT    | 299-14-1i | 20               | 10            | 115,9            |

|            |           |    |    |       |
|------------|-----------|----|----|-------|
| CIMT       | 299-14-2i | 20 | 10 | 106,4 |
| CIMT       | 299-15-1i | 20 | 8  | 91,9  |
| CIMT       | 299-16-1i | 20 | 4  | 48,3  |
| CIMT       | 299-17-1i | 20 | 6  | 75,8  |
| CIMT       | 300-16-1i | 20 | 7  | 46    |
| CIMT       | 300-20-1i | 20 | 11 | 95,3  |
| CIMT       | 300-22-1i | 20 | 4  | 59,8  |
| CIMT       | 300-24-1i | 20 | 3  | 37,3  |
| CIMT       | 300-24-2i | 20 | 5  | 49,4  |
| CIMT       | 309-15-1i | 20 | 6  | 68,6  |
| CIMT       | 309-15-2i | 20 | 11 | 137,8 |
| CIMT       | 309-16-1i | 20 | 10 | 124,3 |
| CIMT       | 309-16-2i | 20 | 12 | 97,8  |
| CIMT       | 309-17-1i | 20 | 11 | 75    |
| CIMT       | 218-11-1i | 20 | 8  | 88,1  |
| CIMT       | 218-14-1i | 20 | 7  | 85,4  |
| CIMT       | 218-16-1i | 20 | 2  | 4,3   |
| CIMT       | 218-17-1i | 20 | 5  | 22,5  |
| CIMT       | 218-19-1i | 20 | 6  | 30    |
| CIMT+G-CSF | 213-12-1i | 20 | 8  | 99    |
| CIMT+G-CSF | 213-14-1i | 20 | 5  | 114,7 |
| CIMT+G-CSF | 213-17-1i | 20 | 16 | 170,7 |
| CIMT+G-CSF | 213-18-1i | 20 | 11 | 161,5 |
| CIMT+G-CSF | 213-8-1i  | 20 | 13 | 154,6 |
| CIMT+G-CSF | 214-14-1i | 20 | 6  | 74,5  |
| CIMT+G-CSF | 214-14-2i | 20 | 5  | 63,2  |
| CIMT+G-CSF | 214-17-1i | 20 | 3  | 33,7  |
| CIMT+G-CSF | 214-18-1i | 20 | 11 | 91    |
| CIMT+G-CSF | 214-19-1i | 20 | 6  | 75,1  |
| CIMT+G-CSF | 217-10-1i | 20 | 9  | 75,2  |
| CIMT+G-CSF | 217-16-1i | 20 | 2  | 10,6  |
| CIMT+G-CSF | 217-17-1i | 20 | 7  | 48,4  |
| CIMT+G-CSF | 217-6-1i  | 20 | 6  | 62,2  |
| CIMT+G-CSF | 217-8-1i  | 20 | 5  | 44,8  |
| CIMT+G-CSF | 304-17-1i | 20 | 5  | 54,9  |
| CIMT+G-CSF | 304-19-1i | 20 | 5  | 68,8  |
| CIMT+G-CSF | 304-19-2i | 20 | 5  | 56,9  |
| CIMT+G-CSF | 304-20-1i | 20 | 7  | 40,2  |
| CIMT+G-CSF | 304-21-1i | 20 | 9  | 130,6 |
| CIMT+G-CSF | 304-21-2i | 20 | 7  | 69,4  |
| CIMT+G-CSF | 304-22-1i | 20 | 10 | 108,2 |
| CIMT+G-CSF | 305-17-1i | 20 | 11 | 95,1  |
| CIMT+G-CSF | 305-17-2i | 20 | 7  | 70,5  |
| CIMT+G-CSF | 305-18-1i | 20 | 6  | 59,1  |
| CIMT+G-CSF | 305-19-1i | 20 | 7  | 108,8 |
| CIMT+G-CSF | 305-19-2i | 20 | 9  | 83,3  |
| CIMT/G-CSF | 306-17-1i | 20 | 6  | 74,1  |
| CIMT/G-CSF | 306-17-2i | 20 | 13 | 177,6 |
| CIMT/G-CSF | 306-18-1i | 20 | 7  | 85,3  |
| CIMT/G-CSF | 306-18-2i | 20 | 8  | 88,7  |
| CIMT/G-CSF | 306-18-3i | 20 | 7  | 68,7  |
| CIMT/G-CSF | 311-16-1i | 20 | 11 | 125,2 |
| CIMT/G-CSF | 311-17-1i | 20 | 8  | 65,3  |
| CIMT/G-CSF | 311-17-2i | 20 | 7  | 54,3  |
| CIMT/G-CSF | 311-18-1i | 20 | 5  | 23,3  |
| CIMT/G-CSF | 311-19-1i | 20 | 10 | 112,8 |

|            |           |    |    |       |
|------------|-----------|----|----|-------|
| CIMT/G-CSF | 313-14-1i | 20 | 11 | 143,4 |
| CIMT/G-CSF | 313-15-1i | 20 | 4  | 18,1  |
| CIMT/G-CSF | 313-17-1i | 20 | 8  | 55,6  |
| CIMT/G-CSF | 313-19-1i | 20 | 7  | 84,1  |
| CIMT/G-CSF | 313-19-2i | 20 | 8  | 74,4  |
| CIMT/G-CSF | 314-16-1i | 20 | 13 | 155   |
| CIMT/G-CSF | 314-16-2i | 20 | 4  | 37,6  |
| CIMT/G-CSF | 314-17-1i | 20 | 5  | 52    |
| CIMT/G-CSF | 314-17-2i | 20 | 5  | 54,3  |
| CIMT/G-CSF | 314-18-1i | 20 | 3  | 38,5  |
| CIMT/G-CSF | 315-11-1i | 20 | 9  | 97,5  |
| CIMT/G-CSF | 315-11-2i | 20 | 7  | 56,4  |
| CIMT/G-CSF | 315-13-1i | 20 | 9  | 90,2  |
| CIMT/G-CSF | 315-13-2i | 20 | 4  | 41,8  |
| CIMT/G-CSF | 315-14-1i | 20 | 7  | 27    |
| CIMT/G-CSF | 315-14-2i | 20 | 5  | 60,1  |
| G-CSF      | 220-16-1i | 20 | 7  | 67,4  |
| G-CSF      | 220-17-1i | 20 | 8  | 77,6  |
| G-CSF      | 220-18-1i | 20 | 3  | 26,8  |
| G-CSF      | 220-19-1i | 20 | 3  | 15,5  |
| G-CSF      | 220-7-1i  | 20 | 1  | 0,2   |
| G-CSF      | 221-13-1i | 20 | 9  | 109,2 |
| G-CSF      | 221-16-1i | 20 | 5  | 31,3  |
| G-CSF      | 221-19-1i | 20 | 8  | 40,9  |
| G-CSF      | 221-22-1i | 20 | 1  | 5,2   |
| G-CSF      | 221-6-1i  | 20 | 5  | 49    |
| G-CSF      | 222-16-1i | 20 | 6  | 44,3  |
| G-CSF      | 222-17-1i | 20 | 8  | 60,5  |
| G-CSF      | 222-21-1i | 20 | 8  | 44,6  |
| G-CSF      | 222-23-1i | 20 | 4  | 27,2  |
| G-CSF      | 222-8-1i  | 20 | 9  | 65,1  |
| G-CSF      | 301-18-1i | 20 | 4  | 55,5  |
| G-CSF      | 301-19-1i | 20 | 5  | 69,6  |
| G-CSF      | 301-20-1i | 20 | 8  | 72,1  |
| G-CSF      | 301-20-2i | 20 | 9  | 78,6  |
| G-CSF      | 301-20-3i | 20 | 8  | 92,5  |
| G-CSF      | 302-16-1i | 20 | 7  | 81,1  |
| G-CSF      | 302-16-2i | 20 | 4  | 56,5  |
| G-CSF      | 302-17-1i | 20 | 9  | 117,3 |
| G-CSF      | 302-17-2i | 20 | 9  | 97,2  |
| G-CSF      | 302-18-1i | 20 | 10 | 112,7 |
| G-CSF      | 303-15-1i | 20 | 7  | 89,3  |
| G-CSF      | 303-16-1i | 20 | 4  | 21,3  |
| G-CSF      | 303-16-2i | 20 | 9  | 122,8 |
| G-CSF      | 303-17-1i | 20 | 7  | 83,9  |
| G-CSF      | 303-17-2i | 20 | 7  | 88,1  |

basilar dendrite Sholl 30µm

| Group   | Number    | Radius(µm) | Intersections | Length(µm) |
|---------|-----------|------------|---------------|------------|
| Control | 215-11-1i | 30         | 11            | 159,3      |
| Control | 215-15-1i | 30         | 14            | 209,3      |
| Control | 215-16-1i | 30         | 15            | 224,5      |
| Control | 215-18-1i | 30         | 9             | 104,6      |
| Control | 215-9-1i  | 30         | 13            | 200,7      |

|         |           |    |    |       |
|---------|-----------|----|----|-------|
| Control | 216-12-1i | 30 | 5  | 77,1  |
| Control | 216-18-1i | 30 | 10 | 132,3 |
| Control | 216-19-1i | 30 | 6  | 121,6 |
| Control | 216-22-1i | 30 | 8  | 77,3  |
| Control | 216-6-1i  | 30 | 10 | 118,3 |
| Control | 216-8-1i  | 30 | 11 | 153,8 |
| Control | 219-10-1i | 30 | 8  | 81    |
| Control | 219-14-1i | 30 | 13 | 129,7 |
| Control | 219-15-1i | 30 | 11 | 146,5 |
| Control | 219-17-1i | 30 | 7  | 60,5  |
| Control | 219-21-1i | 30 | 14 | 174,1 |
| Control | 297-19-1i | 30 | 11 | 152,1 |
| Control | 297-19-2i | 30 | 9  | 128,2 |
| Control | 297-20-1i | 30 | 14 | 153,8 |
| Control | 297-22-1i | 30 | 6  | 78,6  |
| Control | 297-22-2i | 30 | 14 | 141,6 |
| Control | 298-15-1i | 30 | 12 | 139,9 |
| Control | 298-15-2i | 30 | 7  | 92,2  |
| Control | 298-16-1i | 30 | 3  | 37,2  |
| Control | 298-17-1i | 30 | 9  | 113,4 |
| Control | 298-18-1i | 30 | 9  | 116,7 |
| Control | 308-17-1i | 30 | 12 | 170,1 |
| Control | 308-18-1i | 30 | 6  | 82,9  |
| Control | 308-18-2i | 30 | 12 | 166,2 |
| Control | 308-21-1i | 30 | 7  | 99,1  |
| Control | 308-21-2i | 30 | 12 | 168,7 |
| CIMT    | 211-10-1i | 30 | 7  | 92,8  |
| CIMT    | 211-13-1i | 30 | 12 | 144,3 |
| CIMT    | 211-13-2i | 30 | 8  | 108,4 |
| CIMT    | 211-14-1i | 30 | 8  | 132,3 |
| CIMT    | 211-14-2i | 30 | 8  | 118   |
| CIMT    | 211-15-1i | 30 | 8  | 99,4  |
| CIMT    | 211-15-2i | 30 | 9  | 117,4 |
| CIMT    | 212-13-1i | 30 | 7  | 72,8  |
| CIMT    | 212-13-2i | 30 | 7  | 96    |
| CIMT    | 212-14-1i | 30 | 7  | 82,2  |
| CIMT    | 212-14-2i | 30 | 11 | 151,4 |
| CIMT    | 212-15-1i | 30 | 5  | 59,4  |
| CIMT    | 299-14-1i | 30 | 15 | 175,3 |
| CIMT    | 299-14-2i | 30 | 13 | 136,8 |
| CIMT    | 299-15-1i | 30 | 8  | 94,7  |
| CIMT    | 299-16-1i | 30 | 6  | 66    |
| CIMT    | 299-17-1i | 30 | 3  | 66    |
| CIMT    | 300-16-1i | 30 | 10 | 163,5 |
| CIMT    | 300-20-1i | 30 | 15 | 165,4 |
| CIMT    | 300-22-1i | 30 | 8  | 117   |
| CIMT    | 300-24-1i | 30 | 3  | 32,3  |
| CIMT    | 300-24-2i | 30 | 9  | 116,5 |
| CIMT    | 309-15-1i | 30 | 7  | 101,4 |
| CIMT    | 309-15-2i | 30 | 14 | 172,6 |
| CIMT    | 309-16-1i | 30 | 10 | 143,2 |
| CIMT    | 309-16-2i | 30 | 14 | 170,1 |
| CIMT    | 309-17-1i | 30 | 10 | 164,1 |
| CIMT    | 218-11-1i | 30 | 11 | 116,7 |
| CIMT    | 218-14-1i | 30 | 7  | 76,7  |
| CIMT    | 218-16-1i | 30 | 11 | 82,8  |

|            |           |    |    |       |
|------------|-----------|----|----|-------|
| CIMT       | 218-17-1i | 30 | 13 | 98,2  |
| CIMT       | 218-19-1i | 30 | 6  | 88,1  |
| CIMT+G-CSF | 213-12-1i | 30 | 6  | 124,3 |
| CIMT+G-CSF | 213-14-1i | 30 | 5  | 48,7  |
| CIMT+G-CSF | 213-17-1i | 30 | 18 | 178   |
| CIMT+G-CSF | 213-18-1i | 30 | 11 | 130,9 |
| CIMT+G-CSF | 213-8-1i  | 30 | 13 | 149,8 |
| CIMT+G-CSF | 214-14-1i | 30 | 12 | 139,1 |
| CIMT+G-CSF | 214-14-2i | 30 | 9  | 108,9 |
| CIMT+G-CSF | 214-17-1i | 30 | 7  | 81,5  |
| CIMT+G-CSF | 214-18-1i | 30 | 12 | 168   |
| CIMT+G-CSF | 214-19-1i | 30 | 8  | 93,4  |
| CIMT+G-CSF | 217-10-1i | 30 | 7  | 123,8 |
| CIMT+G-CSF | 217-16-1i | 30 | 7  | 73,3  |
| CIMT+G-CSF | 217-17-1i | 30 | 10 | 128,4 |
| CIMT+G-CSF | 217-6-1i  | 30 | 5  | 94,5  |
| CIMT+G-CSF | 217-8-1i  | 30 | 7  | 94    |
| CIMT+G-CSF | 304-17-1i | 30 | 8  | 86,6  |
| CIMT+G-CSF | 304-19-1i | 30 | 6  | 73,1  |
| CIMT+G-CSF | 304-19-2i | 30 | 6  | 70,9  |
| CIMT+G-CSF | 304-20-1i | 30 | 7  | 136,9 |
| CIMT+G-CSF | 304-21-1i | 30 | 11 | 120,2 |
| CIMT+G-CSF | 304-21-2i | 30 | 10 | 111,1 |
| CIMT+G-CSF | 304-22-1i | 30 | 12 | 160,6 |
| CIMT+G-CSF | 305-17-1i | 30 | 9  | 118,8 |
| CIMT+G-CSF | 305-17-2i | 30 | 8  | 107,5 |
| CIMT+G-CSF | 305-18-1i | 30 | 10 | 107,7 |
| CIMT+G-CSF | 305-19-1i | 30 | 11 | 118,7 |
| CIMT+G-CSF | 305-19-2i | 30 | 11 | 185,4 |
| CIMT/G-CSF | 306-17-1i | 30 | 7  | 104,9 |
| CIMT/G-CSF | 306-17-2i | 30 | 17 | 223,8 |
| CIMT/G-CSF | 306-18-1i | 30 | 7  | 116,9 |
| CIMT/G-CSF | 306-18-2i | 30 | 11 | 139,5 |
| CIMT/G-CSF | 306-18-3i | 30 | 8  | 101,3 |
| CIMT/G-CSF | 311-16-1i | 30 | 13 | 211,3 |
| CIMT/G-CSF | 311-17-1i | 30 | 18 | 190,8 |
| CIMT/G-CSF | 311-17-2i | 30 | 11 | 164,7 |
| CIMT/G-CSF | 311-18-1i | 30 | 7  | 91,1  |
| CIMT/G-CSF | 311-19-1i | 30 | 13 | 152,5 |
| CIMT/G-CSF | 313-14-1i | 30 | 10 | 126,6 |
| CIMT/G-CSF | 313-15-1i | 30 | 6  | 101,7 |
| CIMT/G-CSF | 313-17-1i | 30 | 10 | 154   |
| CIMT/G-CSF | 313-19-1i | 30 | 10 | 158,5 |
| CIMT/G-CSF | 313-19-2i | 30 | 10 | 121,7 |
| CIMT/G-CSF | 314-16-1i | 30 | 11 | 176,7 |
| CIMT/G-CSF | 314-16-2i | 30 | 4  | 45,1  |
| CIMT/G-CSF | 314-17-1i | 30 | 8  | 90,6  |
| CIMT/G-CSF | 314-17-2i | 30 | 8  | 96,7  |
| CIMT/G-CSF | 314-18-1i | 30 | 2  | 37,3  |
| CIMT/G-CSF | 315-11-1i | 30 | 10 | 117,3 |
| CIMT/G-CSF | 315-11-2i | 30 | 9  | 185,4 |
| CIMT/G-CSF | 315-13-1i | 30 | 12 | 157,7 |
| CIMT/G-CSF | 315-13-2i | 30 | 7  | 75,3  |
| CIMT/G-CSF | 315-14-1i | 30 | 5  | 89,6  |
| CIMT/G-CSF | 315-14-2i | 30 | 6  | 83,7  |
| G-CSF      | 220-16-1i | 30 | 10 | 127,3 |

|       |           |    |    |       |
|-------|-----------|----|----|-------|
| G-CSF | 220-17-1i | 30 | 13 | 150   |
| G-CSF | 220-18-1i | 30 | 6  | 83,1  |
| G-CSF | 220-19-1i | 30 | 12 | 110   |
| G-CSF | 220-7-1i  | 30 | 5  | 62,8  |
| G-CSF | 221-13-1i | 30 | 9  | 148,7 |
| G-CSF | 221-16-1i | 30 | 17 | 210,1 |
| G-CSF | 221-19-1i | 30 | 17 | 200,1 |
| G-CSF | 221-22-1i | 30 | 8  | 92,3  |
| G-CSF | 221-6-1i  | 30 | 9  | 132,1 |
| G-CSF | 222-16-1i | 30 | 7  | 98,4  |
| G-CSF | 222-17-1i | 30 | 14 | 127,5 |
| G-CSF | 222-21-1i | 30 | 9  | 92,4  |
| G-CSF | 222-23-1i | 30 | 10 | 98,1  |
| G-CSF | 222-8-1i  | 30 | 16 | 179,6 |
| G-CSF | 301-18-1i | 30 | 4  | 46,4  |
| G-CSF | 301-19-1i | 30 | 5  | 71,5  |
| G-CSF | 301-20-1i | 30 | 9  | 105,3 |
| G-CSF | 301-20-2i | 30 | 9  | 131,8 |
| G-CSF | 301-20-3i | 30 | 11 | 148,9 |
| G-CSF | 302-16-1i | 30 | 8  | 107,2 |
| G-CSF | 302-16-2i | 30 | 4  | 60,4  |
| G-CSF | 302-17-1i | 30 | 5  | 77,8  |
| G-CSF | 302-17-2i | 30 | 9  | 114,2 |
| G-CSF | 302-18-1i | 30 | 11 | 146,5 |
| G-CSF | 303-15-1i | 30 | 7  | 90,4  |
| G-CSF | 303-16-1i | 30 | 8  | 106,3 |
| G-CSF | 303-16-2i | 30 | 9  | 126   |
| G-CSF | 303-17-1i | 30 | 8  | 100,3 |
| G-CSF | 303-17-2i | 30 | 10 | 125,4 |

basilar dendrite Sholl 40 $\mu$ m

| Group   | Number    | Radius( $\mu$ m) | Intersections | Length( $\mu$ m) |
|---------|-----------|------------------|---------------|------------------|
| Control | 215-11-1i | 40               | 10            | 168,1            |
| Control | 215-15-1i | 40               | 12            | 171,3            |
| Control | 215-16-1i | 40               | 14            | 207,6            |
| Control | 215-18-1i | 40               | 9             | 101,9            |
| Control | 215-9-1i  | 40               | 6             | 123,8            |
| Control | 216-12-1i | 40               | 4             | 66               |
| Control | 216-18-1i | 40               | 6             | 114,2            |
| Control | 216-19-1i | 40               | 5             | 69,2             |
| Control | 216-22-1i | 40               | 7             | 98,8             |
| Control | 216-6-1i  | 40               | 17            | 194,6            |
| Control | 216-8-1i  | 40               | 11            | 204,2            |
| Control | 219-10-1i | 40               | 11            | 123,2            |
| Control | 219-14-1i | 40               | 9             | 158,3            |
| Control | 219-15-1i | 40               | 10            | 113,6            |
| Control | 219-17-1i | 40               | 11            | 99,8             |
| Control | 219-21-1i | 40               | 15            | 179,2            |
| Control | 297-19-1i | 40               | 11            | 161,3            |
| Control | 297-19-2i | 40               | 5             | 108,4            |
| Control | 297-20-1i | 40               | 14            | 273,5            |
| Control | 297-22-1i | 40               | 9             | 112,8            |
| Control | 297-22-2i | 40               | 13            | 210,6            |
| Control | 298-15-1i | 40               | 10            | 149,7            |

|            |           |    |    |       |
|------------|-----------|----|----|-------|
| Control    | 298-15-2i | 40 | 10 | 146,5 |
| Control    | 298-16-1i | 40 | 6  | 55,1  |
| Control    | 298-17-1i | 40 | 8  | 108,4 |
| Control    | 298-18-1i | 40 | 7  | 91,4  |
| Control    | 308-17-1i | 40 | 13 | 201,9 |
| Control    | 308-18-1i | 40 | 7  | 78,9  |
| Control    | 308-18-2i | 40 | 10 | 166,8 |
| Control    | 308-21-1i | 40 | 7  | 131,2 |
| Control    | 308-21-2i | 40 | 6  | 128   |
| CIMT       | 211-10-1i | 40 | 14 | 185,6 |
| CIMT       | 211-13-1i | 40 | 12 | 173,6 |
| CIMT       | 211-13-2i | 40 | 8  | 98,2  |
| CIMT       | 211-14-1i | 40 | 9  | 129,4 |
| CIMT       | 211-14-2i | 40 | 7  | 131,7 |
| CIMT       | 211-15-1i | 40 | 8  | 93,9  |
| CIMT       | 211-15-2i | 40 | 9  | 111   |
| CIMT       | 212-13-1i | 40 | 7  | 101,3 |
| CIMT       | 212-13-2i | 40 | 5  | 75,3  |
| CIMT       | 212-14-1i | 40 | 6  | 64,9  |
| CIMT       | 212-14-2i | 40 | 9  | 140   |
| CIMT       | 212-15-1i | 40 | 6  | 77,4  |
| CIMT       | 299-14-1i | 40 | 10 | 175,5 |
| CIMT       | 299-14-2i | 40 | 13 | 184   |
| CIMT       | 299-15-1i | 40 | 8  | 101,1 |
| CIMT       | 299-16-1i | 40 | 6  | 81,3  |
| CIMT       | 299-17-1i | 40 | 3  | 31,7  |
| CIMT       | 300-16-1i | 40 | 12 | 135   |
| CIMT       | 300-20-1i | 40 | 15 | 195,6 |
| CIMT       | 300-22-1i | 40 | 11 | 128,2 |
| CIMT       | 300-24-1i | 40 | 5  | 33,7  |
| CIMT       | 300-24-2i | 40 | 13 | 177,1 |
| CIMT       | 309-15-1i | 40 | 7  | 89,2  |
| CIMT       | 309-15-2i | 40 | 11 | 177,9 |
| CIMT       | 309-16-1i | 40 | 8  | 131,9 |
| CIMT       | 309-16-2i | 40 | 16 | 183,2 |
| CIMT       | 309-17-1i | 40 | 10 | 136,7 |
| CIMT       | 218-11-1i | 40 | 11 | 142,5 |
| CIMT       | 218-14-1i | 40 | 8  | 94    |
| CIMT       | 218-16-1i | 40 | 9  | 173,4 |
| CIMT       | 218-17-1i | 40 | 10 | 197,1 |
| CIMT       | 218-19-1i | 40 | 7  | 85,3  |
| CIMT+G-CSF | 213-12-1i | 40 | 4  | 70    |
| CIMT+G-CSF | 213-14-1i | 40 | 2  | 56,7  |
| CIMT+G-CSF | 213-17-1i | 40 | 14 | 203,3 |
| CIMT+G-CSF | 213-18-1i | 40 | 11 | 142   |
| CIMT+G-CSF | 213-8-1i  | 40 | 11 | 154,2 |
| CIMT+G-CSF | 214-14-1i | 40 | 10 | 139,1 |
| CIMT+G-CSF | 214-14-2i | 40 | 9  | 121,9 |
| CIMT+G-CSF | 214-17-1i | 40 | 6  | 105,5 |
| CIMT+G-CSF | 214-18-1i | 40 | 10 | 147,9 |
| CIMT+G-CSF | 214-19-1i | 40 | 7  | 102,3 |
| CIMT+G-CSF | 217-10-1i | 40 | 9  | 101,8 |
| CIMT+G-CSF | 217-16-1i | 40 | 13 | 175,1 |
| CIMT+G-CSF | 217-17-1i | 40 | 13 | 147   |
| CIMT+G-CSF | 217-6-1i  | 40 | 8  | 96,6  |
| CIMT+G-CSF | 217-8-1i  | 40 | 8  | 113,8 |

|                      |    |    |       |
|----------------------|----|----|-------|
| CIMT+G-CSF 304-17-1i | 40 | 4  | 94,2  |
| CIMT+G-CSF 304-19-1i | 40 | 5  | 81,7  |
| CIMT+G-CSF 304-19-2i | 40 | 6  | 69    |
| CIMT+G-CSF 304-20-1i | 40 | 4  | 61,8  |
| CIMT+G-CSF 304-21-1i | 40 | 14 | 154,9 |
| CIMT+G-CSF 304-21-2i | 40 | 7  | 102,3 |
| CIMT+G-CSF 304-22-1i | 40 | 9  | 141   |
| CIMT+G-CSF 305-17-1i | 40 | 8  | 116,1 |
| CIMT+G-CSF 305-17-2i | 40 | 10 | 132,4 |
| CIMT+G-CSF 305-18-1i | 40 | 6  | 120,3 |
| CIMT+G-CSF 305-19-1i | 40 | 9  | 131,9 |
| CIMT+G-CSF 305-19-2i | 40 | 7  | 142,9 |
| CIMT/G-CSF 306-17-1i | 40 | 7  | 101   |
| CIMT/G-CSF 306-17-2i | 40 | 15 | 214,8 |
| CIMT/G-CSF 306-18-1i | 40 | 8  | 109,3 |
| CIMT/G-CSF 306-18-2i | 40 | 13 | 211,6 |
| CIMT/G-CSF 306-18-3i | 40 | 9  | 120,6 |
| CIMT/G-CSF 311-16-1i | 40 | 11 | 161,6 |
| CIMT/G-CSF 311-17-1i | 40 | 20 | 236,9 |
| CIMT/G-CSF 311-17-2i | 40 | 14 | 224,7 |
| CIMT/G-CSF 311-18-1i | 40 | 7  | 95,6  |
| CIMT/G-CSF 311-19-1i | 40 | 18 | 219,1 |
| CIMT/G-CSF 313-14-1i | 40 | 10 | 130   |
| CIMT/G-CSF 313-15-1i | 40 | 5  | 77,6  |
| CIMT/G-CSF 313-17-1i | 40 | 9  | 134,2 |
| CIMT/G-CSF 313-19-1i | 40 | 7  | 99,8  |
| CIMT/G-CSF 313-19-2i | 40 | 8  | 179,4 |
| CIMT/G-CSF 314-16-1i | 40 | 13 | 167,5 |
| CIMT/G-CSF 314-16-2i | 40 | 5  | 59,4  |
| CIMT/G-CSF 314-17-1i | 40 | 12 | 164,4 |
| CIMT/G-CSF 314-17-2i | 40 | 11 | 135,8 |
| CIMT/G-CSF 314-18-1i | 40 | 2  | 32,2  |
| CIMT/G-CSF 315-11-1i | 40 | 7  | 145,1 |
| CIMT/G-CSF 315-11-2i | 40 | 8  | 143,3 |
| CIMT/G-CSF 315-13-1i | 40 | 13 | 182,3 |
| CIMT/G-CSF 315-13-2i | 40 | 7  | 88,5  |
| CIMT/G-CSF 315-14-1i | 40 | 1  | 72,3  |
| CIMT/G-CSF 315-14-2i | 40 | 7  | 76,9  |
| G-CSF 220-16-1i      | 40 | 9  | 134,1 |
| G-CSF 220-17-1i      | 40 | 15 | 187,5 |
| G-CSF 220-18-1i      | 40 | 23 | 246,8 |
| G-CSF 220-19-1i      | 40 | 14 | 194,1 |
| G-CSF 220-7-1i       | 40 | 11 | 126,5 |
| G-CSF 221-13-1i      | 40 | 10 | 115,5 |
| G-CSF 221-16-1i      | 40 | 19 | 305   |
| G-CSF 221-19-1i      | 40 | 18 | 221,1 |
| G-CSF 221-22-1i      | 40 | 9  | 163,5 |
| G-CSF 221-6-1i       | 40 | 12 | 170   |
| G-CSF 222-16-1i      | 40 | 10 | 95,6  |
| G-CSF 222-17-1i      | 40 | 15 | 188,5 |
| G-CSF 222-21-1i      | 40 | 11 | 138,8 |
| G-CSF 222-23-1i      | 40 | 13 | 200,5 |
| G-CSF 222-8-1i       | 40 | 18 | 250   |
| G-CSF 301-18-1i      | 40 | 4  | 52,2  |
| G-CSF 301-19-1i      | 40 | 5  | 76,1  |
| G-CSF 301-20-1i      | 40 | 7  | 112,5 |



|       |           |    |    |       |
|-------|-----------|----|----|-------|
| G-CSF | 301-20-2i | 40 | 14 | 147,5 |
| G-CSF | 301-20-3i | 40 | 14 | 203   |
| G-CSF | 302-16-1i | 40 | 4  | 54,3  |
| G-CSF | 302-16-2i | 40 | 2  | 42,3  |
| G-CSF | 302-17-1i | 40 | 3  | 48,3  |
| G-CSF | 302-17-2i | 40 | 9  | 114   |
| G-CSF | 302-18-1i | 40 | 9  | 123,1 |
| G-CSF | 303-15-1i | 40 | 7  | 95,7  |
| G-CSF | 303-16-1i | 40 | 12 | 165,5 |
| G-CSF | 303-16-2i | 40 | 8  | 110,2 |
| G-CSF | 303-17-1i | 40 | 9  | 107,5 |
| G-CSF | 303-17-2i | 40 | 8  | 105,8 |

basilar dendrite Sholl 50µm

| Group   | Number    | Radius(µm) | Intersections | Length(µm) |
|---------|-----------|------------|---------------|------------|
| Control | 215-11-1i | 50         | 7             | 103,5      |
| Control | 215-15-1i | 50         | 11            | 162,5      |
| Control | 215-16-1i | 50         | 9             | 136        |
| Control | 215-18-1i | 50         | 8             | 100,4      |
| Control | 215-9-1i  | 50         | 5             | 78,4       |
| Control | 216-12-1i | 50         | 2             | 35,8       |
| Control | 216-18-1i | 50         | 2             | 34,3       |
| Control | 216-19-1i | 50         | 1             | 55         |
| Control | 216-22-1i | 50         | 8             | 102,3      |
| Control | 216-6-1i  | 50         | 20            | 266,4      |
| Control | 216-8-1i  | 50         | 9             | 145,7      |
| Control | 219-10-1i | 50         | 9             | 118,5      |
| Control | 219-14-1i | 50         | 9             | 125,7      |
| Control | 219-15-1i | 50         | 9             | 106,6      |
| Control | 219-17-1i | 50         | 10            | 158,8      |
| Control | 219-21-1i | 50         | 13            | 196,7      |
| Control | 297-19-1i | 50         | 10            | 130,5      |
| Control | 297-19-2i | 50         | 5             | 57,2       |
| Control | 297-20-1i | 50         | 14            | 222,5      |
| Control | 297-22-1i | 50         | 8             | 116,5      |
| Control | 297-22-2i | 50         | 10            | 171,8      |
| Control | 298-15-1i | 50         | 11            | 125,3      |
| Control | 298-15-2i | 50         | 8             | 125,7      |
| Control | 298-16-1i | 50         | 5             | 108,3      |
| Control | 298-17-1i | 50         | 7             | 92,2       |
| Control | 298-18-1i | 50         | 5             | 66,7       |
| Control | 308-17-1i | 50         | 13            | 239        |
| Control | 308-18-1i | 50         | 19            | 181,7      |
| Control | 308-18-2i | 50         | 8             | 121,2      |
| Control | 308-21-1i | 50         | 6             | 94         |
| Control | 308-21-2i | 50         | 5             | 74         |
| CIMT    | 211-10-1i | 50         | 19            | 234,3      |
| CIMT    | 211-13-1i | 50         | 10            | 146,2      |
| CIMT    | 211-13-2i | 50         | 7             | 100,7      |
| CIMT    | 211-14-1i | 50         | 8             | 119,1      |
| CIMT    | 211-14-2i | 50         | 5             | 78,1       |
| CIMT    | 211-15-1i | 50         | 7             | 95,4       |
| CIMT    | 211-15-2i | 50         | 8             | 91,3       |
| CIMT    | 212-13-1i | 50         | 5             | 88,7       |

|            |           |    |    |       |
|------------|-----------|----|----|-------|
| CIMT       | 212-13-2i | 50 | 6  | 68,9  |
| CIMT       | 212-14-1i | 50 | 6  | 77,6  |
| CIMT       | 212-14-2i | 50 | 10 | 120,5 |
| CIMT       | 212-15-1i | 50 | 4  | 68,8  |
| CIMT       | 299-14-1i | 50 | 10 | 130,1 |
| CIMT       | 299-14-2i | 50 | 9  | 161,3 |
| CIMT       | 299-15-1i | 50 | 8  | 87,8  |
| CIMT       | 299-16-1i | 50 | 6  | 78,1  |
| CIMT       | 299-17-1i | 50 | 3  | 33,2  |
| CIMT       | 300-16-1i | 50 | 12 | 144,8 |
| CIMT       | 300-20-1i | 50 | 13 | 184,5 |
| CIMT       | 300-22-1i | 50 | 14 | 171,6 |
| CIMT       | 300-24-1i | 50 | 7  | 140,3 |
| CIMT       | 300-24-2i | 50 | 12 | 150,4 |
| CIMT       | 309-15-1i | 50 | 7  | 99    |
| CIMT       | 309-15-2i | 50 | 9  | 125,1 |
| CIMT       | 309-16-1i | 50 | 4  | 78,2  |
| CIMT       | 309-16-2i | 50 | 15 | 195,5 |
| CIMT       | 309-17-1i | 50 | 9  | 121,6 |
| CIMT       | 218-11-1i | 50 | 8  | 129,9 |
| CIMT       | 218-14-1i | 50 | 12 | 138,2 |
| CIMT       | 218-16-1i | 50 | 11 | 154,4 |
| CIMT       | 218-17-1i | 50 | 7  | 190,2 |
| CIMT       | 218-19-1i | 50 | 8  | 111,4 |
| CIMT+G-CSF | 213-12-1i | 50 | 4  | 52,5  |
| CIMT+G-CSF | 213-14-1i | 50 | 1  | 25    |
| CIMT+G-CSF | 213-17-1i | 50 | 13 | 164,6 |
| CIMT+G-CSF | 213-18-1i | 50 | 8  | 123,4 |
| CIMT+G-CSF | 213-8-1i  | 50 | 7  | 116,1 |
| CIMT+G-CSF | 214-14-1i | 50 | 8  | 116,2 |
| CIMT+G-CSF | 214-14-2i | 50 | 8  | 120,3 |
| CIMT+G-CSF | 214-17-1i | 50 | 6  | 72,8  |
| CIMT+G-CSF | 214-18-1i | 50 | 9  | 116,8 |
| CIMT+G-CSF | 214-19-1i | 50 | 4  | 57,3  |
| CIMT+G-CSF | 217-10-1i | 50 | 6  | 76,2  |
| CIMT+G-CSF | 217-16-1i | 50 | 17 | 236,4 |
| CIMT+G-CSF | 217-17-1i | 50 | 17 | 214,6 |
| CIMT+G-CSF | 217-6-1i  | 50 | 11 | 130,9 |
| CIMT+G-CSF | 217-8-1i  | 50 | 9  | 132,8 |
| CIMT+G-CSF | 304-17-1i | 50 | 4  | 46,8  |
| CIMT+G-CSF | 304-19-1i | 50 | 4  | 48,6  |
| CIMT+G-CSF | 304-19-2i | 50 | 7  | 80    |
| CIMT+G-CSF | 304-20-1i | 50 | 5  | 61    |
| CIMT+G-CSF | 304-21-1i | 50 | 12 | 154,3 |
| CIMT+G-CSF | 304-21-2i | 50 | 2  | 56,5  |
| CIMT+G-CSF | 304-22-1i | 50 | 7  | 104,3 |
| CIMT+G-CSF | 305-17-1i | 50 | 8  | 122,8 |
| CIMT+G-CSF | 305-17-2i | 50 | 8  | 130,1 |
| CIMT+G-CSF | 305-18-1i | 50 | 1  | 44    |
| CIMT+G-CSF | 305-19-1i | 50 | 6  | 93,8  |
| CIMT+G-CSF | 305-19-2i | 50 | 6  | 89,6  |
| CIMT/G-CSF | 306-17-1i | 50 | 6  | 81,3  |
| CIMT/G-CSF | 306-17-2i | 50 | 12 | 189,1 |
| CIMT/G-CSF | 306-18-1i | 50 | 7  | 100,6 |
| CIMT/G-CSF | 306-18-2i | 50 | 11 | 178,3 |
| CIMT/G-CSF | 306-18-3i | 50 | 9  | 116,3 |

|                      |    |    |       |
|----------------------|----|----|-------|
| CIMT/G-CSF 311-16-1i | 50 | 10 | 139,9 |
| CIMT/G-CSF 311-17-1i | 50 | 25 | 289,8 |
| CIMT/G-CSF 311-17-2i | 50 | 17 | 222,4 |
| CIMT/G-CSF 311-18-1i | 50 | 6  | 77,2  |
| CIMT/G-CSF 311-19-1i | 50 | 18 | 262,4 |
| CIMT/G-CSF 313-14.1i | 50 | 9  | 137,6 |
| CIMT/G-CSF 313-15-1i | 50 | 6  | 82,6  |
| CIMT/G-CSF 313-17-1i | 50 | 7  | 122   |
| CIMT/G-CSF 313-19-1i | 50 | 5  | 107,1 |
| CIMT/G-CSF 313-19-2i | 50 | 9  | 125,6 |
| CIMT/G-CSF 314-16-1i | 50 | 14 | 217,9 |
| CIMT/G-CSF 314-16-2i | 50 | 6  | 60,4  |
| CIMT/G-CSF 314-17-1i | 50 | 15 | 233,8 |
| CIMT/G-CSF 314-17-2i | 50 | 10 | 157   |
| CIMT/G-CSF 314-18-1i | 50 | 1  | 13,7  |
| CIMT/G-CSF 315-11-1i | 50 | 5  | 79,1  |
| CIMT/G-CSF 315-11-2i | 50 | 7  | 109,6 |
| CIMT/G-CSF 315-13-1i | 50 | 15 | 173,7 |
| CIMT/G-CSF 315-13-2i | 50 | 7  | 80,7  |
| CIMT/G-CSF 315-14-1i | 50 | 1  | 10,5  |
| CIMT/G-CSF 315-14-2i | 50 | 7  | 79,4  |
| G-CSF 220-16-1i      | 50 | 8  | 105,7 |
| G-CSF 220-17-1i      | 50 | 9  | 137,3 |
| G-CSF 220-18-1i      | 50 | 16 | 306,7 |
| G-CSF 220-19-1i      | 50 | 12 | 187,9 |
| G-CSF 220-7-1i       | 50 | 14 | 200,8 |
| G-CSF 221-13-1i      | 50 | 9  | 109,6 |
| G-CSF 221-16-1i      | 50 | 17 | 257,3 |
| G-CSF 221-19-1i      | 50 | 21 | 248,9 |
| G-CSF 221-22-1i      | 50 | 11 | 163,8 |
| G-CSF 221-6-1i       | 50 | 10 | 144,2 |
| G-CSF 222-16-1i      | 50 | 9  | 135,1 |
| G-CSF 222-17-1i      | 50 | 16 | 216,2 |
| G-CSF 222-21-1i      | 50 | 14 | 169   |
| G-CSF 222-23-1i      | 50 | 16 | 224,5 |
| G-CSF 222-8-1i       | 50 | 23 | 277,3 |
| G-CSF 301-18-1i      | 50 | 3  | 50,4  |
| G-CSF 301-19-1i      | 50 | 4  | 62,2  |
| G-CSF 301-20-1i      | 50 | 7  | 88,1  |
| G-CSF 301-20-2i      | 50 | 12 | 166,2 |
| G-CSF 301-20-3i      | 50 | 16 | 191,3 |
| G-CSF 302-16-1i      | 50 | 4  | 46,3  |
| G-CSF 302-16-2i      | 50 | 0  | 11,2  |
| G-CSF 302-17-1i      | 50 | 1  | 26    |
| G-CSF 302-17-2i      | 50 | 6  | 95,2  |
| G-CSF 302-18-1i      | 50 | 6  | 101,5 |
| G-CSF 303-15-1i      | 50 | 8  | 99,4  |
| G-CSF 303-16-1i      | 50 | 15 | 193,1 |
| G-CSF 303-16-2i      | 50 | 9  | 96,1  |
| G-CSF 303-17-1i      | 50 | 9  | 105,2 |
| G-CSF 303-17-2i      | 50 | 7  | 89,3  |

basilar dendrite Sholl 60 $\mu$ m

| Group   | Number    | Radius( $\mu$ m) | Intersections | Length( $\mu$ m) |
|---------|-----------|------------------|---------------|------------------|
| Control | 215-11-1i | 60               | 6             | 97,6             |
| Control | 215-15-1i | 60               | 7             | 119,7            |
| Control | 215-16-1i | 60               | 8             | 111              |
| Control | 215-18-1i | 60               | 8             | 91,8             |
| Control | 215-9-1i  | 60               | 3             | 66,3             |
| Control | 216-12-1i | 60               | 0             | 19,2             |
| Control | 216-18-1i | 60               | 1             | 11,4             |
| Control | 216-19-1i | 60               | 1             | 12               |
| Control | 216-22-1i | 60               | 7             | 103,6            |
| Control | 216-6-1i  | 60               | 14            | 315,5            |
| Control | 216-8-1i  | 60               | 10            | 123,1            |
| Control | 219-10-1i | 60               | 9             | 107,3            |
| Control | 219-14-1i | 60               | 9             | 115              |
| Control | 219-15-1i | 60               | 8             | 97,1             |
| Control | 219-17-1i | 60               | 10            | 147,3            |
| Control | 219-21-1i | 60               | 12            | 170,1            |
| Control | 297-19-1i | 60               | 13            | 161,8            |
| Control | 297-19-2i | 60               | 4             | 61,6             |
| Control | 297-20-1i | 60               | 12            | 171,4            |
| Control | 297-22-1i | 60               | 6             | 98,4             |
| Control | 297-22-2i | 60               | 10            | 134,6            |
| Control | 298-15-1i | 60               | 8             | 130,4            |
| Control | 298-15-2i | 60               | 7             | 88,5             |
| Control | 298-16-1i | 60               | 2             | 44,3             |
| Control | 298-17-1i | 60               | 9             | 95,8             |
| Control | 298-18-1i | 60               | 6             | 66,3             |
| Control | 308-17-1i | 60               | 10            | 207,3            |
| Control | 308-18-1i | 60               | 11            | 234,8            |
| Control | 308-18-2i | 60               | 8             | 92,5             |
| Control | 308-21-1i | 60               | 5             | 86,8             |
| Control | 308-21-2i | 60               | 4             | 53,2             |
| CIMT    | 211-10-1i | 60               | 15            | 243,9            |
| CIMT    | 211-13-1i | 60               | 8             | 100,5            |
| CIMT    | 211-13-2i | 60               | 5             | 79,5             |
| CIMT    | 211-14-1i | 60               | 6             | 84,7             |
| CIMT    | 211-14-2i | 60               | 4             | 58,4             |
| CIMT    | 211-15-1i | 60               | 6             | 82,1             |
| CIMT    | 211-15-2i | 60               | 7             | 84,2             |
| CIMT    | 212-13-1i | 60               | 4             | 54,3             |
| CIMT    | 212-13-2i | 60               | 6             | 71               |
| CIMT    | 212-14-1i | 60               | 3             | 68,7             |
| CIMT    | 212-14-2i | 60               | 9             | 116,6            |
| CIMT    | 212-15-1i | 60               | 3             | 36               |
| CIMT    | 299-14-1i | 60               | 7             | 106,5            |
| CIMT    | 299-14-2i | 60               | 7             | 107              |
| CIMT    | 299-15-1i | 60               | 7             | 92,4             |
| CIMT    | 299-16-1i | 60               | 5             | 73,5             |
| CIMT    | 299-17-1i | 60               | 2             | 31               |
| CIMT    | 300-16-1i | 60               | 9             | 123,9            |
| CIMT    | 300-20-1i | 60               | 11            | 150,7            |
| CIMT    | 300-22-1i | 60               | 10            | 150,7            |
| CIMT    | 300-24-1i | 60               | 9             | 136,9            |
| CIMT    | 300-24-2i | 60               | 10            | 123,2            |

|            |           |    |    |       |
|------------|-----------|----|----|-------|
| CIMT       | 309-15-1i | 60 | 7  | 90,7  |
| CIMT       | 309-15-2i | 60 | 7  | 101,3 |
| CIMT       | 309-16-1i | 60 | 4  | 56    |
| CIMT       | 309-16-2i | 60 | 15 | 186,1 |
| CIMT       | 309-17-1i | 60 | 10 | 108,5 |
| CIMT       | 218-11-1i | 60 | 7  | 81,8  |
| CIMT       | 218-14-1i | 60 | 10 | 128,7 |
| CIMT       | 218-16-1i | 60 | 11 | 120,3 |
| CIMT       | 218-17-1i | 60 | 7  | 118,5 |
| CIMT       | 218-19-1i | 60 | 8  | 102,4 |
| CIMT+G-CSF | 213-12-1i | 60 | 0  | 29,6  |
| CIMT+G-CSF | 213-14-1i | 60 | 0  | 11,9  |
| CIMT+G-CSF | 213-17-1i | 60 | 5  | 132,6 |
| CIMT+G-CSF | 213-18-1i | 60 | 5  | 96,3  |
| CIMT+G-CSF | 213-8-1i  | 60 | 7  | 87,2  |
| CIMT+G-CSF | 214-14-1i | 60 | 4  | 59    |
| CIMT+G-CSF | 214-14-2i | 60 | 3  | 49,7  |
| CIMT+G-CSF | 214-17-1i | 60 | 6  | 75,3  |
| CIMT+G-CSF | 214-18-1i | 60 | 6  | 100   |
| CIMT+G-CSF | 214-19-1i | 60 | 5  | 67    |
| CIMT+G-CSF | 217-10-1i | 60 | 4  | 59,3  |
| CIMT+G-CSF | 217-16-1i | 60 | 15 | 211,3 |
| CIMT+G-CSF | 217-17-1i | 60 | 20 | 255,1 |
| CIMT+G-CSF | 217-6-1i  | 60 | 10 | 138,3 |
| CIMT+G-CSF | 217-8-1i  | 60 | 11 | 152   |
| CIMT+G-CSF | 304-17-1i | 60 | 2  | 39,5  |
| CIMT+G-CSF | 304-19-1i | 60 | 2  | 23,1  |
| CIMT+G-CSF | 304-19-2i | 60 | 5  | 66    |
| CIMT+G-CSF | 304-20-1i | 60 | 3  | 46,4  |
| CIMT+G-CSF | 304-21-1i | 60 | 11 | 180,9 |
| CIMT+G-CSF | 304-21-2i | 60 | 1  | 20,3  |
| CIMT+G-CSF | 304-22-1i | 60 | 5  | 64,1  |
| CIMT+G-CSF | 305-17-1i | 60 | 4  | 88,5  |
| CIMT+G-CSF | 305-17-2i | 60 | 7  | 96,1  |
| CIMT+G-CSF | 305-18-1i | 60 | 1  | 10,8  |
| CIMT+G-CSF | 305-19-1i | 60 | 5  | 71,3  |
| CIMT+G-CSF | 305-19-2i | 60 | 5  | 77,4  |
| CIMT/G-CSF | 306-17-1i | 60 | 3  | 63,3  |
| CIMT/G-CSF | 306-17-2i | 60 | 9  | 159,5 |
| CIMT/G-CSF | 306-18-1i | 60 | 6  | 92,8  |
| CIMT/G-CSF | 306-18-2i | 60 | 8  | 111   |
| CIMT/G-CSF | 306-18-3i | 60 | 9  | 105,5 |
| CIMT/G-CSF | 311-16-1i | 60 | 9  | 117,3 |
| CIMT/G-CSF | 311-17-1i | 60 | 24 | 310,1 |
| CIMT/G-CSF | 311-17-2i | 60 | 17 | 217,6 |
| CIMT/G-CSF | 311-18-1i | 60 | 5  | 63,6  |
| CIMT/G-CSF | 311-19-1i | 60 | 16 | 202,7 |
| CIMT/G-CSF | 313-14.1i | 60 | 6  | 95,6  |
| CIMT/G-CSF | 313-15-1i | 60 | 6  | 85,4  |
| CIMT/G-CSF | 313-17-1i | 60 | 5  | 99,9  |
| CIMT/G-CSF | 313-19-1i | 60 | 2  | 41    |
| CIMT/G-CSF | 313-19-2i | 60 | 10 | 139,5 |
| CIMT/G-CSF | 314-16-1i | 60 | 14 | 174,3 |
| CIMT/G-CSF | 314-16-2i | 60 | 5  | 79,3  |
| CIMT/G-CSF | 314-17-1i | 60 | 12 | 147,5 |
| CIMT/G-CSF | 314-17-2i | 60 | 8  | 128,5 |

|            |           |    |    |       |
|------------|-----------|----|----|-------|
| CIMT/G-CSF | 314-18-1i | 60 | 1  | 11,8  |
| CIMT/G-CSF | 315-11-1i | 60 | 5  | 64,1  |
| CIMT/G-CSF | 315-11-2i | 60 | 5  | 88,3  |
| CIMT/G-CSF | 315-13-1i | 60 | 16 | 182,8 |
| CIMT/G-CSF | 315-13-2i | 60 | 5  | 71,4  |
| CIMT/G-CSF | 315-14-1i | 60 | 1  | 11,9  |
| CIMT/G-CSF | 315-14-2i | 60 | 6  | 77,5  |
| G-CSF      | 220-16-1i | 60 | 5  | 63,2  |
| G-CSF      | 220-17-1i | 60 | 8  | 104,7 |
| G-CSF      | 220-18-1i | 60 | 11 | 189,1 |
| G-CSF      | 220-19-1i | 60 | 12 | 186,1 |
| G-CSF      | 220-7-1i  | 60 | 18 | 227,9 |
| G-CSF      | 221-13-1i | 60 | 8  | 89,2  |
| G-CSF      | 221-16-1i | 60 | 21 | 247   |
| G-CSF      | 221-19-1i | 60 | 19 | 264   |
| G-CSF      | 221-22-1i | 60 | 11 | 175,3 |
| G-CSF      | 221-6-1i  | 60 | 11 | 144,4 |
| G-CSF      | 222-16-1i | 60 | 8  | 104   |
| G-CSF      | 222-17-1i | 60 | 16 | 246   |
| G-CSF      | 222-21-1i | 60 | 17 | 183,6 |
| G-CSF      | 222-23-1i | 60 | 14 | 200,4 |
| G-CSF      | 222-8-1i  | 60 | 21 | 253,2 |
| G-CSF      | 301-18-1i | 60 | 2  | 31,5  |
| G-CSF      | 301-19-1i | 60 | 3  | 46,6  |
| G-CSF      | 301-20-1i | 60 | 6  | 75,1  |
| G-CSF      | 301-20-2i | 60 | 12 | 142,7 |
| G-CSF      | 301-20-3i | 60 | 16 | 199   |
| G-CSF      | 302-16-1i | 60 | 3  | 39,7  |
| G-CSF      | 302-17-1i | 60 | 1  | 12,6  |
| G-CSF      | 302-17-2i | 60 | 6  | 86,8  |
| G-CSF      | 302-18-1i | 60 | 3  | 52,9  |
| G-CSF      | 303-15-1i | 60 | 8  | 104,7 |
| G-CSF      | 303-16-1i | 60 | 16 | 221,8 |
| G-CSF      | 303-16-2i | 60 | 9  | 140,4 |
| G-CSF      | 303-17-1i | 60 | 10 | 126,5 |
| G-CSF      | 303-17-2i | 60 | 6  | 85,6  |

basilar dendrite Sholl 70 $\mu$ m

| Group   | Number    | Radius( $\mu$ m) | Intersections | Length( $\mu$ m) |
|---------|-----------|------------------|---------------|------------------|
| Control | 215-11-1i | 70               | 4             | 72,4             |
| Control | 215-15-1i | 70               | 4             | 55,1             |
| Control | 215-16-1i | 70               | 5             | 86               |
| Control | 215-18-1i | 70               | 8             | 89,7             |
| Control | 215-9-1i  | 70               | 3             | 32,3             |
| Control | 216-18-1i | 70               | 0             | 6,1              |
| Control | 216-19-1i | 70               | 0             | 7                |
| Control | 216-22-1i | 70               | 4             | 49,9             |
| Control | 216-6-1i  | 70               | 13            | 180,8            |
| Control | 216-8-1i  | 70               | 7             | 109,5            |
| Control | 219-10-1i | 70               | 9             | 114,6            |
| Control | 219-14-1i | 70               | 12            | 128,6            |
| Control | 219-15-1i | 70               | 7             | 90,1             |
| Control | 219-17-1i | 70               | 7             | 107,4            |
| Control | 219-21-1i | 70               | 12            | 139,1            |

|            |           |    |    |       |
|------------|-----------|----|----|-------|
| Control    | 297-19-1i | 70 | 9  | 168,1 |
| Control    | 297-19-2i | 70 | 2  | 37,2  |
| Control    | 297-20-1i | 70 | 13 | 177,1 |
| Control    | 297-22-1i | 70 | 2  | 55,1  |
| Control    | 297-22-2i | 70 | 8  | 117,5 |
| Control    | 298-15-1i | 70 | 8  | 123,3 |
| Control    | 298-15-2i | 70 | 3  | 58,3  |
| Control    | 298-16-1i | 70 | 1  | 22,5  |
| Control    | 298-17-1i | 70 | 7  | 98,7  |
| Control    | 298-18-1i | 70 | 6  | 64,7  |
| Control    | 308-17-1i | 70 | 9  | 114   |
| Control    | 308-18-1i | 70 | 11 | 154   |
| Control    | 308-18-2i | 70 | 7  | 106,7 |
| Control    | 308-21-1i | 70 | 2  | 64,9  |
| Control    | 308-21-2i | 70 | 4  | 72,8  |
| CIMT       | 211-10-1i | 70 | 13 | 232   |
| CIMT       | 211-13-1i | 70 | 8  | 102,9 |
| CIMT       | 211-13-2i | 70 | 4  | 79,2  |
| CIMT       | 211-14-1i | 70 | 6  | 94,6  |
| CIMT       | 211-14-2i | 70 | 3  | 51,8  |
| CIMT       | 211-15-1i | 70 | 6  | 67,2  |
| CIMT       | 211-15-2i | 70 | 6  | 76,5  |
| CIMT       | 212-13-1i | 70 | 3  | 60    |
| CIMT       | 212-13-2i | 70 | 5  | 58,2  |
| CIMT       | 212-14-1i | 70 | 2  | 33,8  |
| CIMT       | 212-14-2i | 70 | 8  | 101,3 |
| CIMT       | 212-15-1i | 70 | 3  | 32,8  |
| CIMT       | 299-14-1i | 70 | 4  | 72,9  |
| CIMT       | 299-14-2i | 70 | 5  | 90,7  |
| CIMT       | 299-15-1i | 70 | 8  | 97    |
| CIMT       | 299-16-1i | 70 | 3  | 62,3  |
| CIMT       | 299-17-1i | 70 | 1  | 22,8  |
| CIMT       | 300-16-1i | 70 | 7  | 104,6 |
| CIMT       | 300-20-1i | 70 | 10 | 124,4 |
| CIMT       | 300-22-1i | 70 | 11 | 126   |
| CIMT       | 300-24-1i | 70 | 7  | 148   |
| CIMT       | 300-24-2i | 70 | 8  | 130   |
| CIMT       | 309-15-1i | 70 | 6  | 83,1  |
| CIMT       | 309-15-2i | 70 | 5  | 89,5  |
| CIMT       | 309-16-1i | 70 | 3  | 43,4  |
| CIMT       | 309-16-2i | 70 | 15 | 174,3 |
| CIMT       | 309-17-1i | 70 | 8  | 101,2 |
| CIMT       | 218-11-1i | 70 | 6  | 88,9  |
| CIMT       | 218-14-1i | 70 | 7  | 112,5 |
| CIMT       | 218-16-1i | 70 | 10 | 150,9 |
| CIMT       | 218-17-1i | 70 | 5  | 98,1  |
| CIMT       | 218-19-1i | 70 | 9  | 113,2 |
| CIMT+G-CSF | 213-17-1i | 70 | 6  | 66,1  |
| CIMT+G-CSF | 213-18-1i | 70 | 4  | 65,7  |
| CIMT+G-CSF | 213-8-1i  | 70 | 6  | 76,6  |
| CIMT+G-CSF | 214-14-1i | 70 | 2  | 40,9  |
| CIMT+G-CSF | 214-14-2i | 70 | 3  | 44,5  |
| CIMT+G-CSF | 214-17-1i | 70 | 6  | 69,1  |
| CIMT+G-CSF | 214-18-1i | 70 | 5  | 67,2  |
| CIMT+G-CSF | 214-19-1i | 70 | 5  | 70,8  |
| CIMT+G-CSF | 217-10-1i | 70 | 4  | 51,8  |

|                      |    |    |       |
|----------------------|----|----|-------|
| CIMT+G-CSF 217-16-1i | 70 | 17 | 176,3 |
| CIMT+G-CSF 217-17-1i | 70 | 21 | 241,7 |
| CIMT+G-CSF 217-6-1i  | 70 | 8  | 116,5 |
| CIMT+G-CSF 217-8-1i  | 70 | 12 | 166,4 |
| CIMT+G-CSF 304-17-1i | 70 | 4  | 47,3  |
| CIMT+G-CSF 304-19-1i | 70 | 2  | 25,2  |
| CIMT+G-CSF 304-19-2i | 70 | 3  | 61,2  |
| CIMT+G-CSF 304-20-1i | 70 | 3  | 31,4  |
| CIMT+G-CSF 304-21-1i | 70 | 11 | 139,8 |
| CIMT+G-CSF 304-21-2i | 70 | 1  | 10,8  |
| CIMT+G-CSF 304-22-1i | 70 | 2  | 33,7  |
| CIMT+G-CSF 305-17-1i | 70 | 2  | 37    |
| CIMT+G-CSF 305-17-2i | 70 | 7  | 81,9  |
| CIMT+G-CSF 305-18-1i | 70 | 1  | 11,2  |
| CIMT+G-CSF 305-19-1i | 70 | 3  | 37,1  |
| CIMT+G-CSF 305-19-2i | 70 | 3  | 47,6  |
| CIMT/G-CSF 306-17-1i | 70 | 3  | 45,8  |
| CIMT/G-CSF 306-17-2i | 70 | 6  | 80,7  |
| CIMT/G-CSF 306-18-1i | 70 | 4  | 62,7  |
| CIMT/G-CSF 306-18-2i | 70 | 5  | 73,3  |
| CIMT/G-CSF 306-18-3i | 70 | 6  | 81,9  |
| CIMT/G-CSF 311-16-1i | 70 | 8  | 119,4 |
| CIMT/G-CSF 311-17-1i | 70 | 25 | 321   |
| CIMT/G-CSF 311-17-2i | 70 | 17 | 218,3 |
| CIMT/G-CSF 311-18-1i | 70 | 8  | 92,4  |
| CIMT/G-CSF 311-19-1i | 70 | 16 | 204   |
| CIMT/G-CSF 313-14.1i | 70 | 5  | 69,8  |
| CIMT/G-CSF 313-15-1i | 70 | 7  | 103,8 |
| CIMT/G-CSF 313-17-1i | 70 | 5  | 55,8  |
| CIMT/G-CSF 313-19-1i | 70 | 1  | 11,9  |
| CIMT/G-CSF 313-19-2i | 70 | 7  | 137,4 |
| CIMT/G-CSF 314-16-1i | 70 | 16 | 187   |
| CIMT/G-CSF 314-16-2i | 70 | 5  | 57,9  |
| CIMT/G-CSF 314-17-1i | 70 | 10 | 138,7 |
| CIMT/G-CSF 314-17-2i | 70 | 7  | 88,4  |
| CIMT/G-CSF 314-18-1i | 70 | 1  | 16,6  |
| CIMT/G-CSF 315-11-1i | 70 | 3  | 54,9  |
| CIMT/G-CSF 315-11-2i | 70 | 3  | 47,1  |
| CIMT/G-CSF 315-13-1i | 70 | 13 | 171,3 |
| CIMT/G-CSF 315-13-2i | 70 | 6  | 84,6  |
| CIMT/G-CSF 315-14-1i | 70 | 0  | 2,6   |
| CIMT/G-CSF 315-14-2i | 70 | 5  | 69,8  |
| G-CSF 220-16-1i      | 70 | 5  | 53,8  |
| G-CSF 220-17-1i      | 70 | 7  | 107,2 |
| G-CSF 220-18-1i      | 70 | 9  | 128,9 |
| G-CSF 220-19-1i      | 70 | 11 | 147,1 |
| G-CSF 220-7-1i       | 70 | 17 | 217,4 |
| G-CSF 221-13-1i      | 70 | 9  | 97,9  |
| G-CSF 221-16-1i      | 70 | 23 | 259,9 |
| G-CSF 221-19-1i      | 70 | 20 | 229   |
| G-CSF 221-22-1i      | 70 | 10 | 135,4 |
| G-CSF 221-6-1i       | 70 | 9  | 121,8 |
| G-CSF 222-16-1i      | 70 | 7  | 105,5 |
| G-CSF 222-17-1i      | 70 | 15 | 185,1 |
| G-CSF 222-21-1i      | 70 | 12 | 164,3 |
| G-CSF 222-23-1i      | 70 | 10 | 144,7 |



|       |           |    |    |       |
|-------|-----------|----|----|-------|
| G-CSF | 222-8-1i  | 70 | 17 | 226,8 |
| G-CSF | 301-18-1i | 70 | 2  | 23    |
| G-CSF | 301-19-1i | 70 | 2  | 22    |
| G-CSF | 301-20-1i | 70 | 6  | 69,1  |
| G-CSF | 301-20-2i | 70 | 12 | 133,4 |
| G-CSF | 301-20-3i | 70 | 13 | 179,6 |
| G-CSF | 302-16-1i | 70 | 1  | 21,1  |
| G-CSF | 302-17-1i | 70 | 0  | 1,1   |
| G-CSF | 302-17-2i | 70 | 2  | 71,7  |
| G-CSF | 302-18-1i | 70 | 2  | 31,5  |
| G-CSF | 303-15-1i | 70 | 8  | 95,5  |
| G-CSF | 303-16-1i | 70 | 13 | 209,8 |
| G-CSF | 303-16-2i | 70 | 9  | 116,2 |
| G-CSF | 303-17-1i | 70 | 9  | 119,2 |
| G-CSF | 303-17-2i | 70 | 5  | 73,1  |

basilar dendrite Sholl 80µm

| Group   | Number    | Radius(µm) | Intersections | Length(µm) |
|---------|-----------|------------|---------------|------------|
| Control | 215-11-1i | 80         | 3             | 52,5       |
| Control | 215-15-1i | 80         | 2             | 37,8       |
| Control | 215-16-1i | 80         | 3             | 58,1       |
| Control | 215-18-1i | 80         | 6             | 95,3       |
| Control | 215-9-1i  | 80         | 2             | 34,7       |
| Control | 216-22-1i | 80         | 4             | 44,1       |
| Control | 216-6-1i  | 80         | 12            | 165,1      |
| Control | 216-8-1i  | 80         | 6             | 97,6       |
| Control | 219-10-1i | 80         | 8             | 95,9       |
| Control | 219-14-1i | 80         | 9             | 117        |
| Control | 219-15-1i | 80         | 4             | 71,8       |
| Control | 219-17-1i | 80         | 8             | 84,5       |
| Control | 219-21-1i | 80         | 12            | 129,9      |
| Control | 297-19-1i | 80         | 6             | 136,5      |
| Control | 297-19-2i | 80         | 1             | 16,6       |
| Control | 297-20-1i | 80         | 9             | 177,2      |
| Control | 297-22-1i | 80         | 1             | 16,4       |
| Control | 297-22-2i | 80         | 6             | 80,5       |
| Control | 298-15-1i | 80         | 7             | 99,3       |
| Control | 298-15-2i | 80         | 2             | 28,1       |
| Control | 298-16-1i | 80         | 1             | 15,5       |
| Control | 298-17-1i | 80         | 7             | 89,3       |
| Control | 298-18-1i | 80         | 5             | 89,5       |
| Control | 308-17-1i | 80         | 6             | 94,9       |
| Control | 308-18-1i | 80         | 8             | 120,7      |
| Control | 308-18-2i | 80         | 3             | 44,7       |
| Control | 308-21-1i | 80         | 1             | 20,5       |
| Control | 308-21-2i | 80         | 6             | 66         |
| CIMT    | 211-10-1i | 80         | 17            | 249,3      |
| CIMT    | 211-13-1i | 80         | 6             | 73,3       |
| CIMT    | 211-13-2i | 80         | 4             | 43,9       |
| CIMT    | 211-14-1i | 80         | 6             | 94,5       |
| CIMT    | 211-14-2i | 80         | 1             | 22,5       |
| CIMT    | 211-15-1i | 80         | 3             | 60,4       |
| CIMT    | 211-15-2i | 80         | 6             | 71,4       |
| CIMT    | 212-13-1i | 80         | 3             | 40,1       |

|            |           |    |    |       |
|------------|-----------|----|----|-------|
| CIMT       | 212-13-2i | 80 | 4  | 52,3  |
| CIMT       | 212-14-1i | 80 | 1  | 49,4  |
| CIMT       | 212-14-2i | 80 | 6  | 83,3  |
| CIMT       | 212-15-1i | 80 | 3  | 33,9  |
| CIMT       | 299-14-1i | 80 | 1  | 34,8  |
| CIMT       | 299-14-2i | 80 | 3  | 53,7  |
| CIMT       | 299-15-1i | 80 | 8  | 91,7  |
| CIMT       | 299-16-1i | 80 | 3  | 35,8  |
| CIMT       | 299-17-1i | 80 | 1  | 11,5  |
| CIMT       | 300-16-1i | 80 | 3  | 49,6  |
| CIMT       | 300-20-1i | 80 | 9  | 109,8 |
| CIMT       | 300-22-1i | 80 | 10 | 128,7 |
| CIMT       | 300-24-1i | 80 | 8  | 154,3 |
| CIMT       | 300-24-2i | 80 | 7  | 85,3  |
| CIMT       | 309-15-1i | 80 | 6  | 72,7  |
| CIMT       | 309-15-2i | 80 | 4  | 53,4  |
| CIMT       | 309-16-1i | 80 | 2  | 33,3  |
| CIMT       | 309-16-2i | 80 | 15 | 182,5 |
| CIMT       | 309-17-1i | 80 | 8  | 95,5  |
| CIMT       | 218-11-1i | 80 | 3  | 67,4  |
| CIMT       | 218-14-1i | 80 | 5  | 74,4  |
| CIMT       | 218-16-1i | 80 | 11 | 133,3 |
| CIMT       | 218-17-1i | 80 | 5  | 84,5  |
| CIMT       | 218-19-1i | 80 | 10 | 131,3 |
| CIMT+G-CSF | 213-17-1i | 80 | 5  | 62,5  |
| CIMT+G-CSF | 213-18-1i | 80 | 5  | 52,9  |
| CIMT+G-CSF | 213-8-1i  | 80 | 5  | 66,2  |
| CIMT+G-CSF | 214-14-1i | 80 | 1  | 23,6  |
| CIMT+G-CSF | 214-14-2i | 80 | 2  | 26,7  |
| CIMT+G-CSF | 214-17-1i | 80 | 4  | 66,1  |
| CIMT+G-CSF | 214-18-1i | 80 | 4  | 51,3  |
| CIMT+G-CSF | 214-19-1i | 80 | 4  | 52,2  |
| CIMT+G-CSF | 217-10-1i | 80 | 1  | 26,3  |
| CIMT+G-CSF | 217-16-1i | 80 | 16 | 206,6 |
| CIMT+G-CSF | 217-17-1i | 80 | 18 | 248,7 |
| CIMT+G-CSF | 217-6-1i  | 80 | 7  | 86    |
| CIMT+G-CSF | 217-8-1i  | 80 | 12 | 182,3 |
| CIMT+G-CSF | 304-17-1i | 80 | 2  | 40,1  |
| CIMT+G-CSF | 304-19-1i | 80 | 2  | 20,7  |
| CIMT+G-CSF | 304-19-2i | 80 | 2  | 29,2  |
| CIMT+G-CSF | 304-20-1i | 80 | 3  | 56,4  |
| CIMT+G-CSF | 304-21-1i | 80 | 8  | 107,1 |
| CIMT+G-CSF | 304-21-2i | 80 | 0  | 1,6   |
| CIMT+G-CSF | 304-22-1i | 80 | 1  | 13,6  |
| CIMT+G-CSF | 305-17-1i | 80 | 2  | 21,3  |
| CIMT+G-CSF | 305-17-2i | 80 | 7  | 108,4 |
| CIMT+G-CSF | 305-18-1i | 80 | 1  | 12,1  |
| CIMT+G-CSF | 305-19-1i | 80 | 3  | 35,4  |
| CIMT+G-CSF | 305-19-2i | 80 | 3  | 31,4  |
| CIMT/G-CSF | 306-17-1i | 80 | 1  | 35,9  |
| CIMT/G-CSF | 306-17-2i | 80 | 5  | 75,3  |
| CIMT/G-CSF | 306-18-1i | 80 | 2  | 29,4  |
| CIMT/G-CSF | 306-18-2i | 80 | 3  | 51,9  |
| CIMT/G-CSF | 306-18-3i | 80 | 4  | 62,3  |
| CIMT/G-CSF | 311-16-1i | 80 | 5  | 95,6  |
| CIMT/G-CSF | 311-17-1i | 80 | 25 | 377,9 |

|            |           |    |    |       |
|------------|-----------|----|----|-------|
| CIMT/G-CSF | 311-17-2i | 80 | 17 | 205,6 |
| CIMT/G-CSF | 311-18-1i | 80 | 5  | 98,6  |
| CIMT/G-CSF | 311-19-1i | 80 | 15 | 192,9 |
| CIMT/G-CSF | 313-14.1i | 80 | 2  | 53,2  |
| CIMT/G-CSF | 313-15-1i | 80 | 7  | 119,8 |
| CIMT/G-CSF | 313-17-1i | 80 | 3  | 48,4  |
| CIMT/G-CSF | 313-19-1i | 80 | 1  | 10,1  |
| CIMT/G-CSF | 313-19-2i | 80 | 5  | 81,9  |
| CIMT/G-CSF | 314-16-1i | 80 | 10 | 203,6 |
| CIMT/G-CSF | 314-16-2i | 80 | 5  | 71,9  |
| CIMT/G-CSF | 314-17-1i | 80 | 10 | 123,5 |
| CIMT/G-CSF | 314-17-2i | 80 | 6  | 95,5  |
| CIMT/G-CSF | 314-18-1i | 80 | 1  | 15,4  |
| CIMT/G-CSF | 315-11-1i | 80 | 2  | 32,5  |
| CIMT/G-CSF | 315-11-2i | 80 | 2  | 37,1  |
| CIMT/G-CSF | 315-13-1i | 80 | 10 | 146,9 |
| CIMT/G-CSF | 315-13-2i | 80 | 5  | 96    |
| CIMT/G-CSF | 315-14-2i | 80 | 3  | 56,4  |
| G-CSF      | 220-16-1i | 80 | 4  | 43,6  |
| G-CSF      | 220-17-1i | 80 | 7  | 85    |
| G-CSF      | 220-18-1i | 80 | 7  | 140,4 |
| G-CSF      | 220-19-1i | 80 | 10 | 138,6 |
| G-CSF      | 220-7-1i  | 80 | 10 | 179   |
| G-CSF      | 221-13-1i | 80 | 9  | 106,9 |
| G-CSF      | 221-16-1i | 80 | 24 | 299,2 |
| G-CSF      | 221-19-1i | 80 | 22 | 238,1 |
| G-CSF      | 221-22-1i | 80 | 12 | 151,7 |
| G-CSF      | 221-6-1i  | 80 | 9  | 117,2 |
| G-CSF      | 222-16-1i | 80 | 6  | 73,3  |
| G-CSF      | 222-17-1i | 80 | 11 | 162,6 |
| G-CSF      | 222-21-1i | 80 | 11 | 125,5 |
| G-CSF      | 222-23-1i | 80 | 8  | 113,1 |
| G-CSF      | 222-8-1i  | 80 | 9  | 177,9 |
| G-CSF      | 301-18-1i | 80 | 1  | 16,3  |
| G-CSF      | 301-19-1i | 80 | 1  | 17,2  |
| G-CSF      | 301-20-1i | 80 | 5  | 72,5  |
| G-CSF      | 301-20-2i | 80 | 12 | 137,8 |
| G-CSF      | 301-20-3i | 80 | 13 | 151,1 |
| G-CSF      | 302-16-1i | 80 | 1  | 11,2  |
| G-CSF      | 302-17-2i | 80 | 1  | 20,2  |
| G-CSF      | 302-18-1i | 80 | 0  | 3,6   |
| G-CSF      | 303-15-1i | 80 | 8  | 105,1 |
| G-CSF      | 303-16-1i | 80 | 12 | 150,6 |
| G-CSF      | 303-16-2i | 80 | 7  | 94,9  |
| G-CSF      | 303-17-1i | 80 | 8  | 113,8 |
| G-CSF      | 303-17-2i | 80 | 3  | 43    |

basilar dendrite Sholl 90µm

| Group   | Number    | Radius(µm) | Intersections | Length(µm) |
|---------|-----------|------------|---------------|------------|
| Control | 215-11-1i | 90         | 1             | 47,6       |
| Control | 215-15-1i | 90         | 1             | 27,2       |
| Control | 215-16-1i | 90         | 2             | 22,4       |
| Control | 215-18-1i | 90         | 5             | 57,3       |
| Control | 215-9-1i  | 90         | 1             | 13,6       |

|            |           |    |    |       |
|------------|-----------|----|----|-------|
| Control    | 216-22-1i | 90 | 1  | 22,6  |
| Control    | 216-6-1i  | 90 | 10 | 135,1 |
| Control    | 216-8-1i  | 90 | 5  | 70,6  |
| Control    | 219-10-1i | 90 | 5  | 75,8  |
| Control    | 219-14-1i | 90 | 9  | 97,3  |
| Control    | 219-15-1i | 90 | 4  | 42    |
| Control    | 219-17-1i | 90 | 7  | 90,6  |
| Control    | 219-21-1i | 90 | 8  | 115   |
| Control    | 297-19-1i | 90 | 3  | 51    |
| Control    | 297-19-2i | 90 | 0  | 12,3  |
| Control    | 297-20-1i | 90 | 7  | 127   |
| Control    | 297-22-1i | 90 | 1  | 14,2  |
| Control    | 297-22-2i | 90 | 6  | 74    |
| Control    | 298-15-1i | 90 | 4  | 61,3  |
| Control    | 298-15-2i | 90 | 1  | 21,2  |
| Control    | 298-16-1i | 90 | 0  | 5,3   |
| Control    | 298-17-1i | 90 | 6  | 69,1  |
| Control    | 298-18-1i | 90 | 4  | 52,7  |
| Control    | 308-17-1i | 90 | 4  | 55,2  |
| Control    | 308-18-1i | 90 | 7  | 99,2  |
| Control    | 308-18-2i | 90 | 2  | 29,3  |
| Control    | 308-21-1i | 90 | 1  | 10,6  |
| Control    | 308-21-2i | 90 | 5  | 76,1  |
| CIMT       | 211-10-1i | 90 | 12 | 200,9 |
| CIMT       | 211-13-1i | 90 | 4  | 64,9  |
| CIMT       | 211-13-2i | 90 | 4  | 50,6  |
| CIMT       | 211-14-1i | 90 | 4  | 63,6  |
| CIMT       | 211-14-2i | 90 | 0  | 16,8  |
| CIMT       | 211-15-1i | 90 | 3  | 33,7  |
| CIMT       | 211-15-2i | 90 | 5  | 66,8  |
| CIMT       | 212-13-1i | 90 | 3  | 36,1  |
| CIMT       | 212-13-2i | 90 | 4  | 46,4  |
| CIMT       | 212-14-1i | 90 | 1  | 11    |
| CIMT       | 212-14-2i | 90 | 3  | 68,5  |
| CIMT       | 212-15-1i | 90 | 1  | 25,1  |
| CIMT       | 299-14-1i | 90 | 1  | 10,3  |
| CIMT       | 299-14-2i | 90 | 1  | 34,5  |
| CIMT       | 299-15-1i | 90 | 6  | 87,3  |
| CIMT       | 299-16-1i | 90 | 2  | 35,1  |
| CIMT       | 299-17-1i | 90 | 1  | 12    |
| CIMT       | 300-16-1i | 90 | 2  | 35,7  |
| CIMT       | 300-20-1i | 90 | 6  | 81,4  |
| CIMT       | 300-22-1i | 90 | 8  | 102,9 |
| CIMT       | 300-24-1i | 90 | 7  | 135,2 |
| CIMT       | 300-24-2i | 90 | 8  | 149,8 |
| CIMT       | 309-15-1i | 90 | 4  | 67,5  |
| CIMT       | 309-15-2i | 90 | 3  | 54,6  |
| CIMT       | 309-16-1i | 90 | 2  | 25,5  |
| CIMT       | 309-16-2i | 90 | 14 | 203,5 |
| CIMT       | 309-17-1i | 90 | 7  | 84,6  |
| CIMT       | 218-11-1i | 90 | 1  | 12,3  |
| CIMT       | 218-14-1i | 90 | 3  | 49,3  |
| CIMT       | 218-16-1i | 90 | 15 | 148   |
| CIMT       | 218-17-1i | 90 | 3  | 63    |
| CIMT       | 218-19-1i | 90 | 10 | 125,1 |
| CIMT+G-CSF | 213-17-1i | 90 | 4  | 53,4  |

|                      |    |    |       |
|----------------------|----|----|-------|
| CIMT+G-CSF 213-18-1i | 90 | 2  | 44,1  |
| CIMT+G-CSF 213-8-1i  | 90 | 3  | 43    |
| CIMT+G-CSF 214-14-1i | 90 | 0  | 6     |
| CIMT+G-CSF 214-14-2i | 90 | 2  | 43,6  |
| CIMT+G-CSF 214-17-1i | 90 | 4  | 45,5  |
| CIMT+G-CSF 214-18-1i | 90 | 3  | 47,1  |
| CIMT+G-CSF 214-19-1i | 90 | 3  | 47,8  |
| CIMT+G-CSF 217-10-1i | 90 | 1  | 11    |
| CIMT+G-CSF 217-16-1i | 90 | 13 | 240,8 |
| CIMT+G-CSF 217-17-1i | 90 | 14 | 183,9 |
| CIMT+G-CSF 217-6-1i  | 90 | 8  | 115,3 |
| CIMT+G-CSF 217-8-1i  | 90 | 8  | 115,2 |
| CIMT+G-CSF 304-17-1i | 90 | 0  | 25,2  |
| CIMT+G-CSF 304-19-1i | 90 | 2  | 21,1  |
| CIMT+G-CSF 304-19-2i | 90 | 2  | 23,4  |
| CIMT+G-CSF 304-20-1i | 90 | 2  | 33,6  |
| CIMT+G-CSF 304-21-1i | 90 | 7  | 88    |
| CIMT+G-CSF 304-22-1i | 90 | 0  | 1,2   |
| CIMT+G-CSF 305-17-1i | 90 | 2  | 24,8  |
| CIMT+G-CSF 305-17-2i | 90 | 3  | 59,8  |
| CIMT+G-CSF 305-18-1i | 90 | 0  | 10    |
| CIMT+G-CSF 305-19-1i | 90 | 2  | 32,3  |
| CIMT+G-CSF 305-19-2i | 90 | 2  | 58    |
| CIMT/G-CSF 306-17-1i | 90 | 1  | 18,7  |
| CIMT/G-CSF 306-17-2i | 90 | 3  | 45,8  |
| CIMT/G-CSF 306-18-1i | 90 | 2  | 25,1  |
| CIMT/G-CSF 306-18-2i | 90 | 2  | 36,5  |
| CIMT/G-CSF 306-18-3i | 90 | 2  | 44,2  |
| CIMT/G-CSF 311-16-1i | 90 | 4  | 78,6  |
| CIMT/G-CSF 311-17-1i | 90 | 24 | 363,9 |
| CIMT/G-CSF 311-17-2i | 90 | 16 | 208,8 |
| CIMT/G-CSF 311-18-1i | 90 | 3  | 61,2  |
| CIMT/G-CSF 311-19-1i | 90 | 16 | 194,9 |
| CIMT/G-CSF 313-14.1i | 90 | 1  | 13,6  |
| CIMT/G-CSF 313-15-1i | 90 | 6  | 82    |
| CIMT/G-CSF 313-17-1i | 90 | 4  | 44    |
| CIMT/G-CSF 313-19-1i | 90 | 1  | 14,2  |
| CIMT/G-CSF 313-19-2i | 90 | 3  | 64,6  |
| CIMT/G-CSF 314-16-1i | 90 | 7  | 109,1 |
| CIMT/G-CSF 314-16-2i | 90 | 4  | 54,8  |
| CIMT/G-CSF 314-17-1i | 90 | 8  | 125,2 |
| CIMT/G-CSF 314-17-2i | 90 | 7  | 97,8  |
| CIMT/G-CSF 314-18-1i | 90 | 2  | 24,3  |
| CIMT/G-CSF 315-11-1i | 90 | 0  | 5,7   |
| CIMT/G-CSF 315-11-2i | 90 | 2  | 28,7  |
| CIMT/G-CSF 315-13-1i | 90 | 7  | 99,7  |
| CIMT/G-CSF 315-13-2i | 90 | 1  | 35,3  |
| CIMT/G-CSF 315-14-2i | 90 | 1  | 19,3  |
| G-CSF 220-16-1i      | 90 | 4  | 55,3  |
| G-CSF 220-17-1i      | 90 | 5  | 62,6  |
| G-CSF 220-18-1i      | 90 | 4  | 60,3  |
| G-CSF 220-19-1i      | 90 | 6  | 99,4  |
| G-CSF 220-7-1i       | 90 | 6  | 80,9  |
| G-CSF 221-13-1i      | 90 | 8  | 119,4 |
| G-CSF 221-16-1i      | 90 | 22 | 272,5 |
| G-CSF 221-19-1i      | 90 | 20 | 269,6 |

|       |           |    |    |       |
|-------|-----------|----|----|-------|
| G-CSF | 221-22-1i | 90 | 12 | 149,1 |
| G-CSF | 221-6-1i  | 90 | 9  | 101,1 |
| G-CSF | 222-16-1i | 90 | 6  | 71,9  |
| G-CSF | 222-17-1i | 90 | 12 | 146,8 |
| G-CSF | 222-21-1i | 90 | 10 | 122,3 |
| G-CSF | 222-23-1i | 90 | 7  | 94,5  |
| G-CSF | 222-8-1i  | 90 | 10 | 104,4 |
| G-CSF | 301-18-1i | 90 | 0  | 6,2   |
| G-CSF | 301-19-1i | 90 | 1  | 12,5  |
| G-CSF | 301-20-1i | 90 | 4  | 50,1  |
| G-CSF | 301-20-2i | 90 | 11 | 130,5 |
| G-CSF | 301-20-3i | 90 | 13 | 160   |
| G-CSF | 302-16-1i | 90 | 1  | 10,4  |
| G-CSF | 302-17-2i | 90 | 1  | 10,6  |
| G-CSF | 303-15-1i | 90 | 5  | 70,5  |
| G-CSF | 303-16-1i | 90 | 10 | 137,1 |
| G-CSF | 303-16-2i | 90 | 4  | 77,3  |
| G-CSF | 303-17-1i | 90 | 4  | 71,7  |
| G-CSF | 303-17-2i | 90 | 3  | 39,6  |

basilar dendrite Sholl 100 $\mu$ m

| Group   | Number    | Radius( $\mu$ m) | Intersections | Length( $\mu$ m) |
|---------|-----------|------------------|---------------|------------------|
| Control | 215-11-1i | 100              | 0             | 0,2              |
| Control | 215-15-1i | 100              | 0             | 1,8              |
| Control | 215-16-1i | 100              | 2             | 21,8             |
| Control | 215-18-1i | 100              | 2             | 58,2             |
| Control | 215-9-1i  | 100              | 0             | 7,5              |
| Control | 216-22-1i | 100              | 1             | 10,5             |
| Control | 216-6-1i  | 100              | 7             | 106,6            |
| Control | 216-8-1i  | 100              | 3             | 70,2             |
| Control | 219-10-1i | 100              | 3             | 40               |
| Control | 219-14-1i | 100              | 7             | 89,7             |
| Control | 219-15-1i | 100              | 5             | 50,9             |
| Control | 219-17-1i | 100              | 6             | 69,1             |
| Control | 219-21-1i | 100              | 8             | 88               |
| Control | 297-19-1i | 100              | 2             | 24               |
| Control | 297-20-1i | 100              | 4             | 72,9             |
| Control | 297-22-1i | 100              | 1             | 15,1             |
| Control | 297-22-2i | 100              | 6             | 74,4             |
| Control | 298-15-1i | 100              | 4             | 45,1             |
| Control | 298-15-2i | 100              | 0             | 1                |
| Control | 298-17-1i | 100              | 6             | 70               |
| Control | 298-18-1i | 100              | 4             | 43,4             |
| Control | 308-17-1i | 100              | 4             | 67,4             |
| Control | 308-18-1i | 100              | 6             | 98,1             |
| Control | 308-18-2i | 100              | 1             | 11,9             |
| Control | 308-21-1i | 100              | 0             | 10,2             |
| Control | 308-21-2i | 100              | 4             | 74,9             |
| CIMT    | 211-10-1i | 100              | 13            | 166,3            |
| CIMT    | 211-13-1i | 100              | 5             | 55,1             |
| CIMT    | 211-13-2i | 100              | 4             | 54,2             |
| CIMT    | 211-14-1i | 100              | 4             | 41,9             |
| CIMT    | 211-15-1i | 100              | 2             | 21,6             |
| CIMT    | 211-15-2i | 100              | 4             | 50,7             |

|            |           |     |    |       |
|------------|-----------|-----|----|-------|
| CIMT       | 212-13-1i | 100 | 1  | 23    |
| CIMT       | 212-13-2i | 100 | 4  | 46,8  |
| CIMT       | 212-14-1i | 100 | 1  | 10,5  |
| CIMT       | 212-14-2i | 100 | 2  | 41,3  |
| CIMT       | 212-15-1i | 100 | 1  | 11,9  |
| CIMT       | 299-14-1i | 100 | 1  | 10,5  |
| CIMT       | 299-14-2i | 100 | 0  | 7,3   |
| CIMT       | 299-15-1i | 100 | 5  | 62,2  |
| CIMT       | 299-16-1i | 100 | 1  | 18,1  |
| CIMT       | 299-17-1i | 100 | 1  | 12,8  |
| CIMT       | 300-16-1i | 100 | 1  | 14,9  |
| CIMT       | 300-20-1i | 100 | 2  | 49,8  |
| CIMT       | 300-22-1i | 100 | 8  | 85    |
| CIMT       | 300-24-1i | 100 | 6  | 99    |
| CIMT       | 300-24-2i | 100 | 6  | 88,9  |
| CIMT       | 309-15-1i | 100 | 4  | 52,8  |
| CIMT       | 309-15-2i | 100 | 1  | 15,3  |
| CIMT       | 309-16-1i | 100 | 0  | 4,3   |
| CIMT       | 309-16-2i | 100 | 11 | 188,5 |
| CIMT       | 309-17-1i | 100 | 5  | 78,6  |
| CIMT       | 218-11-1i | 100 | 0  | 8     |
| CIMT       | 218-14-1i | 100 | 3  | 36,8  |
| CIMT       | 218-16-1i | 100 | 11 | 167,7 |
| CIMT       | 218-17-1i | 100 | 3  | 38    |
| CIMT       | 218-19-1i | 100 | 8  | 107,8 |
| CIMT+G-CSF | 213-17-1i | 100 | 4  | 36,1  |
| CIMT+G-CSF | 213-18-1i | 100 | 0  | 4,9   |
| CIMT+G-CSF | 213-8-1i  | 100 | 1  | 26,8  |
| CIMT+G-CSF | 214-14-2i | 100 | 0  | 9,6   |
| CIMT+G-CSF | 214-17-1i | 100 | 4  | 44,3  |
| CIMT+G-CSF | 214-18-1i | 100 | 2  | 28,5  |
| CIMT+G-CSF | 214-19-1i | 100 | 2  | 56,3  |
| CIMT+G-CSF | 217-10-1i | 100 | 0  | 1,2   |
| CIMT+G-CSF | 217-16-1i | 100 | 14 | 179,2 |
| CIMT+G-CSF | 217-17-1i | 100 | 11 | 133,2 |
| CIMT+G-CSF | 217-6-1i  | 100 | 6  | 77,5  |
| CIMT+G-CSF | 217-8-1i  | 100 | 6  | 105,8 |
| CIMT+G-CSF | 304-19-1i | 100 | 2  | 21,7  |
| CIMT+G-CSF | 304-19-2i | 100 | 2  | 24,1  |
| CIMT+G-CSF | 304-20-1i | 100 | 2  | 21,4  |
| CIMT+G-CSF | 304-21-1i | 100 | 5  | 60,9  |
| CIMT+G-CSF | 305-17-1i | 100 | 2  | 23,2  |
| CIMT+G-CSF | 305-17-2i | 100 | 2  | 33,4  |
| CIMT+G-CSF | 305-19-1i | 100 | 1  | 21,5  |
| CIMT+G-CSF | 305-19-2i | 100 | 1  | 23,2  |
| CIMT/G-CSF | 306-17-1i | 100 | 0  | 16,9  |
| CIMT/G-CSF | 306-17-2i | 100 | 2  | 50,1  |
| CIMT/G-CSF | 306-18-1i | 100 | 2  | 28,2  |
| CIMT/G-CSF | 306-18-2i | 100 | 0  | 14,8  |
| CIMT/G-CSF | 306-18-3i | 100 | 1  | 18,7  |
| CIMT/G-CSF | 311-16-1i | 100 | 4  | 57,5  |
| CIMT/G-CSF | 311-17-1i | 100 | 22 | 342,7 |
| CIMT/G-CSF | 311-17-2i | 100 | 16 | 201   |
| CIMT/G-CSF | 311-18-1i | 100 | 2  | 24,8  |
| CIMT/G-CSF | 311-19-1i | 100 | 11 | 195,6 |
| CIMT/G-CSF | 313-14.1i | 100 | 0  | 3,1   |

|            |           |     |    |       |
|------------|-----------|-----|----|-------|
| CIMT/G-CSF | 313-15-1i | 100 | 5  | 72,3  |
| CIMT/G-CSF | 313-17-1i | 100 | 4  | 47,9  |
| CIMT/G-CSF | 313-19-1i | 100 | 0  | 6,2   |
| CIMT/G-CSF | 313-19-2i | 100 | 2  | 35,3  |
| CIMT/G-CSF | 314-16-1i | 100 | 7  | 81,4  |
| CIMT/G-CSF | 314-16-2i | 100 | 1  | 32,8  |
| CIMT/G-CSF | 314-17-1i | 100 | 8  | 94,6  |
| CIMT/G-CSF | 314-17-2i | 100 | 6  | 89    |
| CIMT/G-CSF | 314-18-1i | 100 | 0  | 1,1   |
| CIMT/G-CSF | 315-11-2i | 100 | 2  | 21,4  |
| CIMT/G-CSF | 315-13-1i | 100 | 6  | 95,9  |
| CIMT/G-CSF | 315-13-2i | 100 | 1  | 10,6  |
| CIMT/G-CSF | 315-14-2i | 100 | 0  | 7,7   |
| G-CSF      | 220-16-1i | 100 | 2  | 40,1  |
| G-CSF      | 220-17-1i | 100 | 4  | 44,7  |
| G-CSF      | 220-18-1i | 100 | 2  | 29,7  |
| G-CSF      | 220-19-1i | 100 | 6  | 94,5  |
| G-CSF      | 220-7-1i  | 100 | 5  | 66,7  |
| G-CSF      | 221-13-1i | 100 | 8  | 108,9 |
| G-CSF      | 221-16-1i | 100 | 20 | 253,6 |
| G-CSF      | 221-19-1i | 100 | 17 | 246,1 |
| G-CSF      | 221-22-1i | 100 | 8  | 125,7 |
| G-CSF      | 221-6-1i  | 100 | 8  | 106,3 |
| G-CSF      | 222-16-1i | 100 | 2  | 47,4  |
| G-CSF      | 222-17-1i | 100 | 11 | 129,5 |
| G-CSF      | 222-21-1i | 100 | 9  | 104,3 |
| G-CSF      | 222-23-1i | 100 | 5  | 82,1  |
| G-CSF      | 222-8-1i  | 100 | 10 | 107,3 |
| G-CSF      | 301-19-1i | 100 | 1  | 13,6  |
| G-CSF      | 301-20-1i | 100 | 3  | 35,2  |
| G-CSF      | 301-20-2i | 100 | 11 | 122,9 |
| G-CSF      | 301-20-3i | 100 | 12 | 139,4 |
| G-CSF      | 302-16-1i | 100 | 1  | 10,1  |
| G-CSF      | 302-17-2i | 100 | 1  | 10,2  |
| G-CSF      | 303-15-1i | 100 | 4  | 52,5  |
| G-CSF      | 303-16-1i | 100 | 11 | 123,6 |
| G-CSF      | 303-16-2i | 100 | 2  | 26,2  |
| G-CSF      | 303-17-1i | 100 | 3  | 39,7  |
| G-CSF      | 303-17-2i | 100 | 1  | 24,9  |

basilar dendrite Sholl 110 $\mu$ m

| Group   | Number    | Radius( $\mu$ m) | Intersections | Length( $\mu$ m) |
|---------|-----------|------------------|---------------|------------------|
| Control | 215-16-1i | 110              | 2             | 29,1             |
| Control | 215-18-1i | 110              | 1             | 13,9             |
| Control | 216-22-1i | 110              | 1             | 10,4             |
| Control | 216-6-1i  | 110              | 7             | 81,7             |
| Control | 216-8-1i  | 110              | 2             | 35,4             |
| Control | 219-10-1i | 110              | 3             | 31,5             |
| Control | 219-14-1i | 110              | 7             | 75,5             |
| Control | 219-15-1i | 110              | 4             | 56,7             |
| Control | 219-17-1i | 110              | 3             | 45,9             |
| Control | 219-21-1i | 110              | 8             | 89,2             |
| Control | 297-19-1i | 110              | 1             | 25,6             |
| Control | 297-20-1i | 110              | 2             | 33,8             |



|            |           |     |    |       |
|------------|-----------|-----|----|-------|
| Control    | 297-22-1i | 110 | 1  | 16,6  |
| Control    | 297-22-2i | 110 | 3  | 48,1  |
| Control    | 298-15-1i | 110 | 4  | 60,8  |
| Control    | 298-17-1i | 110 | 6  | 70,8  |
| Control    | 298-18-1i | 110 | 4  | 51    |
| Control    | 308-17-1i | 110 | 2  | 33,9  |
| Control    | 308-18-1i | 110 | 5  | 91,8  |
| Control    | 308-18-2i | 110 | 0  | 9,5   |
| Control    | 308-21-2i | 110 | 4  | 54,2  |
| CIMT       | 211-10-1i | 110 | 9  | 191,1 |
| CIMT       | 211-13-1i | 110 | 3  | 48,8  |
| CIMT       | 211-13-2i | 110 | 2  | 24,8  |
| CIMT       | 211-14-1i | 110 | 2  | 42,4  |
| CIMT       | 211-15-1i | 110 | 2  | 21,1  |
| CIMT       | 211-15-2i | 110 | 4  | 54,3  |
| CIMT       | 212-13-1i | 110 | 0  | 5,6   |
| CIMT       | 212-13-2i | 110 | 2  | 36,2  |
| CIMT       | 212-14-1i | 110 | 1  | 10,3  |
| CIMT       | 212-14-2i | 110 | 0  | 20,5  |
| CIMT       | 212-15-1i | 110 | 1  | 10,6  |
| CIMT       | 299-14-1i | 110 | 0  | 9,1   |
| CIMT       | 299-15-1i | 110 | 6  | 94,2  |
| CIMT       | 299-16-1i | 110 | 1  | 10    |
| CIMT       | 299-17-1i | 110 | 0  | 13,7  |
| CIMT       | 300-16-1i | 110 | 0  | 5,3   |
| CIMT       | 300-20-1i | 110 | 0  | 4,9   |
| CIMT       | 300-22-1i | 110 | 7  | 84,8  |
| CIMT       | 300-24-1i | 110 | 2  | 43,7  |
| CIMT       | 300-24-2i | 110 | 3  | 50,9  |
| CIMT       | 309-15-1i | 110 | 4  | 46    |
| CIMT       | 309-15-2i | 110 | 1  | 32,6  |
| CIMT       | 309-16-2i | 110 | 11 | 139,4 |
| CIMT       | 309-17-1i | 110 | 5  | 53,3  |
| CIMT       | 218-14-1i | 110 | 1  | 28    |
| CIMT       | 218-16-1i | 110 | 9  | 105,7 |
| CIMT       | 218-17-1i | 110 | 3  | 39,6  |
| CIMT       | 218-19-1i | 110 | 9  | 119,4 |
| CIMT+G-CSF | 213-17-1i | 110 | 2  | 25,8  |
| CIMT+G-CSF | 213-8-1i  | 110 | 1  | 11,4  |
| CIMT+G-CSF | 214-17-1i | 110 | 4  | 47,5  |
| CIMT+G-CSF | 214-18-1i | 110 | 2  | 23,6  |
| CIMT+G-CSF | 214-19-1i | 110 | 1  | 24,1  |
| CIMT+G-CSF | 217-16-1i | 110 | 13 | 173,6 |
| CIMT+G-CSF | 217-17-1i | 110 | 8  | 99,2  |
| CIMT+G-CSF | 217-6-1i  | 110 | 3  | 48,5  |
| CIMT+G-CSF | 217-8-1i  | 110 | 5  | 76,7  |
| CIMT+G-CSF | 304-19-1i | 110 | 1  | 14,5  |
| CIMT+G-CSF | 304-19-2i | 110 | 1  | 13,6  |
| CIMT+G-CSF | 304-20-1i | 110 | 3  | 21,9  |
| CIMT+G-CSF | 304-21-1i | 110 | 6  | 70,9  |
| CIMT+G-CSF | 305-17-1i | 110 | 2  | 26,7  |
| CIMT+G-CSF | 305-17-2i | 110 | 1  | 19,6  |
| CIMT+G-CSF | 305-19-1i | 110 | 2  | 12    |
| CIMT+G-CSF | 305-19-2i | 110 | 1  | 10,9  |
| CIMT/G-CSF | 306-17-2i | 110 | 0  | 20,5  |
| CIMT/G-CSF | 306-18-1i | 110 | 0  | 12,9  |

|            |           |     |    |       |
|------------|-----------|-----|----|-------|
| CIMT/G-CSF | 306-18-3i | 110 | 0  | 0,1   |
| CIMT/G-CSF | 311-16-1i | 110 | 4  | 46,4  |
| CIMT/G-CSF | 311-17-1i | 110 | 19 | 293,2 |
| CIMT/G-CSF | 311-17-2i | 110 | 15 | 197,2 |
| CIMT/G-CSF | 311-18-1i | 110 | 2  | 23,4  |
| CIMT/G-CSF | 311-19-1i | 110 | 9  | 128,8 |
| CIMT/G-CSF | 313-15-1i | 110 | 4  | 61,8  |
| CIMT/G-CSF | 313-17-1i | 110 | 4  | 53,1  |
| CIMT/G-CSF | 313-19-2i | 110 | 1  | 18,9  |
| CIMT/G-CSF | 314-16-1i | 110 | 5  | 75,2  |
| CIMT/G-CSF | 314-16-2i | 110 | 1  | 11,8  |
| CIMT/G-CSF | 314-17-1i | 110 | 8  | 96,8  |
| CIMT/G-CSF | 314-17-2i | 110 | 5  | 70,1  |
| CIMT/G-CSF | 315-11-2i | 110 | 1  | 21,4  |
| CIMT/G-CSF | 315-13-1i | 110 | 6  | 64,2  |
| CIMT/G-CSF | 315-13-2i | 110 | 1  | 10,2  |
| G-CSF      | 220-16-1i | 110 | 2  | 27,1  |
| G-CSF      | 220-17-1i | 110 | 3  | 55    |
| G-CSF      | 220-18-1i | 110 | 1  | 14,7  |
| G-CSF      | 220-19-1i | 110 | 6  | 101,8 |
| G-CSF      | 220-7-1i  | 110 | 4  | 49,3  |
| G-CSF      | 221-13-1i | 110 | 5  | 70,6  |
| G-CSF      | 221-16-1i | 110 | 17 | 214,2 |
| G-CSF      | 221-19-1i | 110 | 17 | 204   |
| G-CSF      | 221-22-1i | 110 | 6  | 69,8  |
| G-CSF      | 221-6-1i  | 110 | 8  | 106   |
| G-CSF      | 222-16-1i | 110 | 2  | 22,5  |
| G-CSF      | 222-17-1i | 110 | 7  | 91,9  |
| G-CSF      | 222-21-1i | 110 | 9  | 101,9 |
| G-CSF      | 222-23-1i | 110 | 5  | 57,9  |
| G-CSF      | 222-8-1i  | 110 | 9  | 115,2 |
| G-CSF      | 301-19-1i | 110 | 0  | 9,7   |
| G-CSF      | 301-20-1i | 110 | 2  | 26,4  |
| G-CSF      | 301-20-2i | 110 | 8  | 132,2 |
| G-CSF      | 301-20-3i | 110 | 10 | 134,9 |
| G-CSF      | 302-16-1i | 110 | 1  | 10,1  |
| G-CSF      | 302-17-2i | 110 | 1  | 13,7  |
| G-CSF      | 303-15-1i | 110 | 4  | 44,9  |
| G-CSF      | 303-16-1i | 110 | 7  | 175,1 |
| G-CSF      | 303-16-2i | 110 | 1  | 17    |
| G-CSF      | 303-17-1i | 110 | 3  | 37,4  |
| G-CSF      | 303-17-2i | 110 | 0  | 8,6   |

basilar dendrite Sholl 120 $\mu$ m

| Group   | Number    | Radius( $\mu$ m) | Intersections | Length( $\mu$ m) |
|---------|-----------|------------------|---------------|------------------|
| Control | 215-16-1i | 120              | 1             | 18,3             |
| Control | 215-18-1i | 120              | 0             | 8                |
| Control | 216-22-1i | 120              | 1             | 10,5             |
| Control | 216-6-1i  | 120              | 4             | 79,9             |
| Control | 216-8-1i  | 120              | 1             | 19,3             |
| Control | 219-10-1i | 120              | 2             | 29,9             |
| Control | 219-14-1i | 120              | 6             | 70,1             |
| Control | 219-15-1i | 120              | 3             | 41,4             |
| Control | 219-17-1i | 120              | 3             | 37               |

|            |           |     |    |       |
|------------|-----------|-----|----|-------|
| Control    | 219-21-1i | 120 | 7  | 86,1  |
| Control    | 297-19-1i | 120 | 0  | 0,7   |
| Control    | 297-20-1i | 120 | 1  | 18,8  |
| Control    | 297-22-1i | 120 | 1  | 10,5  |
| Control    | 297-22-2i | 120 | 3  | 36,8  |
| Control    | 298-15-1i | 120 | 2  | 45,3  |
| Control    | 298-17-1i | 120 | 2  | 49,3  |
| Control    | 298-18-1i | 120 | 3  | 36,8  |
| Control    | 308-17-1i | 120 | 1  | 28,9  |
| Control    | 308-18-1i | 120 | 3  | 64,8  |
| Control    | 308-21-2i | 120 | 2  | 58,9  |
| CIMT       | 211-10-1i | 120 | 8  | 113,3 |
| CIMT       | 211-13-1i | 120 | 3  | 39,4  |
| CIMT       | 211-13-2i | 120 | 1  | 24,8  |
| CIMT       | 211-14-1i | 120 | 2  | 34,8  |
| CIMT       | 211-15-1i | 120 | 3  | 38,1  |
| CIMT       | 211-15-2i | 120 | 4  | 52,9  |
| CIMT       | 212-13-2i | 120 | 1  | 16,5  |
| CIMT       | 212-14-1i | 120 | 1  | 12,2  |
| CIMT       | 212-15-1i | 120 | 1  | 12,8  |
| CIMT       | 299-15-1i | 120 | 1  | 27,7  |
| CIMT       | 299-16-1i | 120 | 1  | 10,9  |
| CIMT       | 300-22-1i | 120 | 7  | 74,5  |
| CIMT       | 300-24-1i | 120 | 1  | 17,7  |
| CIMT       | 300-24-2i | 120 | 2  | 34,1  |
| CIMT       | 309-15-1i | 120 | 3  | 42,4  |
| CIMT       | 309-15-2i | 120 | 1  | 17,9  |
| CIMT       | 309-16-2i | 120 | 9  | 146,8 |
| CIMT       | 309-17-1i | 120 | 5  | 54    |
| CIMT       | 218-14-1i | 120 | 0  | 6,7   |
| CIMT       | 218-16-1i | 120 | 9  | 99,6  |
| CIMT       | 218-17-1i | 120 | 2  | 35,9  |
| CIMT       | 218-19-1i | 120 | 2  | 81,1  |
| CIMT+G-CSF | 213-17-1i | 120 | 1  | 22    |
| CIMT+G-CSF | 213-8-1i  | 120 | 0  | 13,9  |
| CIMT+G-CSF | 214-17-1i | 120 | 2  | 50,9  |
| CIMT+G-CSF | 214-18-1i | 120 | 2  | 27,2  |
| CIMT+G-CSF | 214-19-1i | 120 | 1  | 10,8  |
| CIMT+G-CSF | 217-16-1i | 120 | 12 | 147,2 |
| CIMT+G-CSF | 217-17-1i | 120 | 7  | 83,3  |
| CIMT+G-CSF | 217-6-1i  | 120 | 2  | 29,7  |
| CIMT+G-CSF | 217-8-1i  | 120 | 5  | 77,6  |
| CIMT+G-CSF | 304-19-1i | 120 | 1  | 10,4  |
| CIMT+G-CSF | 304-19-2i | 120 | 1  | 10,8  |
| CIMT+G-CSF | 304-20-1i | 120 | 2  | 41,1  |
| CIMT+G-CSF | 304-21-1i | 120 | 6  | 70,7  |
| CIMT+G-CSF | 305-17-1i | 120 | 2  | 23,9  |
| CIMT+G-CSF | 305-17-2i | 120 | 0  | 8,9   |
| CIMT+G-CSF | 305-19-1i | 120 | 0  | 32,3  |
| CIMT+G-CSF | 305-19-2i | 120 | 1  | 16,7  |
| CIMT/G-CSF | 311-16-1i | 120 | 3  | 57    |
| CIMT/G-CSF | 311-17-1i | 120 | 14 | 231,2 |
| CIMT/G-CSF | 311-17-2i | 120 | 14 | 163,5 |
| CIMT/G-CSF | 311-18-1i | 120 | 2  | 40,8  |
| CIMT/G-CSF | 311-19-1i | 120 | 8  | 106,7 |
| CIMT/G-CSF | 313-15-1i | 120 | 2  | 33    |

|            |           |     |    |       |
|------------|-----------|-----|----|-------|
| CIMT/G-CSF | 313-17-1i | 120 | 4  | 50    |
| CIMT/G-CSF | 313-19-2i | 120 | 1  | 12,4  |
| CIMT/G-CSF | 314-16-1i | 120 | 4  | 62,6  |
| CIMT/G-CSF | 314-16-2i | 120 | 0  | 1,2   |
| CIMT/G-CSF | 314-17-1i | 120 | 7  | 117,3 |
| CIMT/G-CSF | 314-17-2i | 120 | 3  | 60    |
| CIMT/G-CSF | 315-11-2i | 120 | 1  | 11,7  |
| CIMT/G-CSF | 315-13-1i | 120 | 5  | 63,4  |
| CIMT/G-CSF | 315-13-2i | 120 | 1  | 10,1  |
| G-CSF      | 220-16-1i | 120 | 1  | 19,3  |
| G-CSF      | 220-17-1i | 120 | 1  | 33,9  |
| G-CSF      | 220-18-1i | 120 | 1  | 10,5  |
| G-CSF      | 220-19-1i | 120 | 4  | 65,2  |
| G-CSF      | 220-7-1i  | 120 | 4  | 44,7  |
| G-CSF      | 221-13-1i | 120 | 5  | 57,2  |
| G-CSF      | 221-16-1i | 120 | 13 | 176,7 |
| G-CSF      | 221-19-1i | 120 | 17 | 185,2 |
| G-CSF      | 221-22-1i | 120 | 6  | 68,5  |
| G-CSF      | 221-6-1i  | 120 | 5  | 65,8  |
| G-CSF      | 222-16-1i | 120 | 1  | 10,5  |
| G-CSF      | 222-17-1i | 120 | 6  | 64,5  |
| G-CSF      | 222-21-1i | 120 | 9  | 101,9 |
| G-CSF      | 222-23-1i | 120 | 4  | 53,9  |
| G-CSF      | 222-8-1i  | 120 | 5  | 80,7  |
| G-CSF      | 301-20-1i | 120 | 0  | 15,5  |
| G-CSF      | 301-20-2i | 120 | 6  | 83,8  |
| G-CSF      | 301-20-3i | 120 | 8  | 108,2 |
| G-CSF      | 302-16-1i | 120 | 0  | 2,1   |
| G-CSF      | 302-17-2i | 120 | 1  | 11,9  |
| G-CSF      | 303-15-1i | 120 | 1  | 20,9  |
| G-CSF      | 303-16-1i | 120 | 6  | 97,8  |
| G-CSF      | 303-16-2i | 120 | 1  | 10,8  |
| G-CSF      | 303-17-1i | 120 | 2  | 33,3  |

basilar dendrite Sholl 130 $\mu$ m

| Group   | Number    | Radius( $\mu$ m) | Intersections | Length( $\mu$ m) |
|---------|-----------|------------------|---------------|------------------|
| Control | 215-16-1i | 130              | 1             | 12,6             |
| Control | 216-22-1i | 130              | 0             | 11,1             |
| Control | 216-6-1i  | 130              | 3             | 34,7             |
| Control | 216-8-1i  | 130              | 1             | 11,7             |
| Control | 219-10-1i | 130              | 2             | 22,3             |
| Control | 219-14-1i | 130              | 5             | 56,5             |
| Control | 219-15-1i | 130              | 2             | 30,2             |
| Control | 219-17-1i | 130              | 3             | 34,2             |
| Control | 219-21-1i | 130              | 6             | 75,1             |
| Control | 297-20-1i | 130              | 0             | 6,8              |
| Control | 297-22-1i | 130              | 1             | 10,6             |
| Control | 297-22-2i | 130              | 1             | 15,9             |
| Control | 298-15-1i | 130              | 1             | 36,9             |
| Control | 298-17-1i | 130              | 1             | 20,3             |
| Control | 298-18-1i | 130              | 3             | 37,6             |
| Control | 308-17-1i | 130              | 0             | 0                |
| Control | 308-18-1i | 130              | 0             | 24               |
| Control | 308-21-2i | 130              | 2             | 22,3             |

|            |           |     |    |       |
|------------|-----------|-----|----|-------|
| CIMT       | 211-10-1i | 130 | 2  | 76    |
| CIMT       | 211-13-1i | 130 | 2  | 34,1  |
| CIMT       | 211-13-2i | 130 | 0  | 0,5   |
| CIMT       | 211-14-1i | 130 | 1  | 13,2  |
| CIMT       | 211-15-1i | 130 | 2  | 31,7  |
| CIMT       | 211-15-2i | 130 | 3  | 32,2  |
| CIMT       | 212-13-2i | 130 | 0  | 3,8   |
| CIMT       | 212-14-1i | 130 | 1  | 11,7  |
| CIMT       | 212-15-1i | 130 | 1  | 13,3  |
| CIMT       | 299-15-1i | 130 | 1  | 14,2  |
| CIMT       | 299-16-1i | 130 | 1  | 12,4  |
| CIMT       | 300-22-1i | 130 | 6  | 74,3  |
| CIMT       | 300-24-1i | 130 | 2  | 28,6  |
| CIMT       | 300-24-2i | 130 | 2  | 21,8  |
| CIMT       | 309-15-1i | 130 | 2  | 39,3  |
| CIMT       | 309-15-2i | 130 | 1  | 13    |
| CIMT       | 309-16-2i | 130 | 5  | 99,6  |
| CIMT       | 309-17-1i | 130 | 5  | 53,9  |
| CIMT       | 218-16-1i | 130 | 9  | 109   |
| CIMT       | 218-17-1i | 130 | 2  | 25,7  |
| CIMT       | 218-19-1i | 130 | 2  | 21,5  |
| CIMT+G-CSF | 213-17-1i | 130 | 1  | 17,6  |
| CIMT+G-CSF | 214-17-1i | 130 | 0  | 17,9  |
| CIMT+G-CSF | 214-18-1i | 130 | 2  | 20,7  |
| CIMT+G-CSF | 214-19-1i | 130 | 1  | 13    |
| CIMT+G-CSF | 217-16-1i | 130 | 10 | 125,9 |
| CIMT+G-CSF | 217-17-1i | 130 | 8  | 69,3  |
| CIMT+G-CSF | 217-6-1i  | 130 | 1  | 21,7  |
| CIMT+G-CSF | 217-8-1i  | 130 | 5  | 69,2  |
| CIMT+G-CSF | 304-19-1i | 130 | 1  | 10,7  |
| CIMT+G-CSF | 304-19-2i | 130 | 0  | 12    |
| CIMT+G-CSF | 304-20-1i | 130 | 0  | 6     |
| CIMT+G-CSF | 304-21-1i | 130 | 4  | 56,2  |
| CIMT+G-CSF | 305-17-1i | 130 | 2  | 27,2  |
| CIMT+G-CSF | 305-19-2i | 130 | 1  | 18,3  |
| CIMT/G-CSF | 311-16-1i | 130 | 1  | 37,3  |
| CIMT/G-CSF | 311-17-1i | 130 | 8  | 180,6 |
| CIMT/G-CSF | 311-17-2i | 130 | 14 | 174   |
| CIMT/G-CSF | 311-18-1i | 130 | 2  | 23,9  |
| CIMT/G-CSF | 311-19-1i | 130 | 2  | 72,9  |
| CIMT/G-CSF | 313-15-1i | 130 | 1  | 41,4  |
| CIMT/G-CSF | 313-17-1i | 130 | 3  | 42,2  |
| CIMT/G-CSF | 313-19-2i | 130 | 0  | 1,8   |
| CIMT/G-CSF | 314-16-1i | 130 | 2  | 36,4  |
| CIMT/G-CSF | 314-17-1i | 130 | 6  | 77,4  |
| CIMT/G-CSF | 314-17-2i | 130 | 2  | 34,1  |
| CIMT/G-CSF | 315-11-2i | 130 | 0  | 4     |
| CIMT/G-CSF | 315-13-1i | 130 | 2  | 62,6  |
| CIMT/G-CSF | 315-13-2i | 130 | 2  | 11,7  |
| G-CSF      | 220-16-1i | 130 | 1  | 19,8  |
| G-CSF      | 220-17-1i | 130 | 1  | 10,3  |
| G-CSF      | 220-18-1i | 130 | 0  | 9,1   |
| G-CSF      | 220-19-1i | 130 | 4  | 52,5  |
| G-CSF      | 220-7-1i  | 130 | 2  | 37,5  |
| G-CSF      | 221-13-1i | 130 | 3  | 48,4  |
| G-CSF      | 221-16-1i | 130 | 11 | 134,5 |

|       |           |     |    |       |
|-------|-----------|-----|----|-------|
| G-CSF | 221-19-1i | 130 | 16 | 203,9 |
| G-CSF | 221-22-1i | 130 | 7  | 75,2  |
| G-CSF | 221-6-1i  | 130 | 4  | 49,8  |
| G-CSF | 222-16-1i | 130 | 0  | 0,8   |
| G-CSF | 222-17-1i | 130 | 5  | 52,3  |
| G-CSF | 222-21-1i | 130 | 8  | 91,4  |
| G-CSF | 222-23-1i | 130 | 3  | 40,7  |
| G-CSF | 222-8-1i  | 130 | 3  | 61,2  |
| G-CSF | 301-20-2i | 130 | 3  | 70,8  |
| G-CSF | 301-20-3i | 130 | 9  | 104,7 |
| G-CSF | 302-17-2i | 130 | 1  | 11,7  |
| G-CSF | 303-15-1i | 130 | 1  | 12,8  |
| G-CSF | 303-16-1i | 130 | 7  | 84,9  |
| G-CSF | 303-16-2i | 130 | 1  | 11,7  |
| G-CSF | 303-17-1i | 130 | 1  | 21,1  |

basilar dendrite Sholl 140µm

| Group      | Number    | Radius(µm) | Intersections | Length(µm) |
|------------|-----------|------------|---------------|------------|
| Control    | 215-16-1i | 140        | 0             | 15,3       |
| Control    | 216-6-1i  | 140        | 2             | 25,8       |
| Control    | 216-8-1i  | 140        | 1             | 13,6       |
| Control    | 219-10-1i | 140        | 2             | 21,4       |
| Control    | 219-14-1i | 140        | 4             | 52,4       |
| Control    | 219-15-1i | 140        | 2             | 20,8       |
| Control    | 219-17-1i | 140        | 1             | 25,3       |
| Control    | 219-21-1i | 140        | 3             | 48,3       |
| Control    | 297-22-1i | 140        | 1             | 10,2       |
| Control    | 297-22-2i | 140        | 0             | 0          |
| Control    | 298-15-1i | 140        | 1             | 11,1       |
| Control    | 298-17-1i | 140        | 0             | 4,8        |
| Control    | 298-18-1i | 140        | 2             | 23,5       |
| Control    | 308-21-2i | 140        | 0             | 21,4       |
| CIMT       | 211-10-1i | 140        | 1             | 11,5       |
| CIMT       | 211-13-1i | 140        | 2             | 25,9       |
| CIMT       | 211-14-1i | 140        | 1             | 11,3       |
| CIMT       | 211-15-1i | 140        | 2             | 22,4       |
| CIMT       | 211-15-2i | 140        | 2             | 27,9       |
| CIMT       | 212-14-1i | 140        | 1             | 11         |
| CIMT       | 212-15-1i | 140        | 1             | 11,5       |
| CIMT       | 299-15-1i | 140        | 0             | 6,9        |
| CIMT       | 299-16-1i | 140        | 1             | 10,4       |
| CIMT       | 300-22-1i | 140        | 5             | 55,2       |
| CIMT       | 300-24-1i | 140        | 0             | 23,4       |
| CIMT       | 300-24-2i | 140        | 2             | 20,7       |
| CIMT       | 309-15-1i | 140        | 1             | 15,5       |
| CIMT       | 309-15-2i | 140        | 1             | 11,9       |
| CIMT       | 309-16-2i | 140        | 1             | 40,8       |
| CIMT       | 309-17-1i | 140        | 4             | 53,9       |
| CIMT       | 218-16-1i | 140        | 7             | 83         |
| CIMT       | 218-17-1i | 140        | 1             | 16,2       |
| CIMT       | 218-19-1i | 140        | 2             | 22,5       |
| CIMT+G-CSF | 213-17-1i | 140        | 0             | 2          |
| CIMT+G-CSF | 214-18-1i | 140        | 1             | 16,8       |
| CIMT+G-CSF | 214-19-1i | 140        | 0             | 7,7        |

|                      |     |    |       |
|----------------------|-----|----|-------|
| CIMT+G-CSF 217-16-1i | 140 | 10 | 108,8 |
| CIMT+G-CSF 217-17-1i | 140 | 4  | 65,7  |
| CIMT+G-CSF 217-6-1i  | 140 | 1  | 10,9  |
| CIMT+G-CSF 217-8-1i  | 140 | 2  | 58,5  |
| CIMT+G-CSF 304-19-1i | 140 | 1  | 10,6  |
| CIMT+G-CSF 304-21-1i | 140 | 1  | 28,5  |
| CIMT+G-CSF 305-17-1i | 140 | 1  | 13,3  |
| CIMT+G-CSF 305-19-2i | 140 | 0  | 3,1   |
| CIMT/G-CSF 311-16-1i | 140 | 1  | 10,3  |
| CIMT/G-CSF 311-17-1i | 140 | 4  | 65,6  |
| CIMT/G-CSF 311-17-2i | 140 | 11 | 154,2 |
| CIMT/G-CSF 311-18-1i | 140 | 3  | 50,8  |
| CIMT/G-CSF 311-19-1i | 140 | 1  | 17,8  |
| CIMT/G-CSF 313-15-1i | 140 | 1  | 12,6  |
| CIMT/G-CSF 313-17-1i | 140 | 1  | 17    |
| CIMT/G-CSF 314-16-1i | 140 | 2  | 21,8  |
| CIMT/G-CSF 314-17-1i | 140 | 6  | 70,2  |
| CIMT/G-CSF 314-17-2i | 140 | 1  | 21,2  |
| CIMT/G-CSF 315-13-1i | 140 | 2  | 21,7  |
| CIMT/G-CSF 315-13-2i | 140 | 2  | 25,3  |
| G-CSF 220-16-1i      | 140 | 1  | 12    |
| G-CSF 220-17-1i      | 140 | 1  | 10,6  |
| G-CSF 220-19-1i      | 140 | 3  | 47,4  |
| G-CSF 220-7-1i       | 140 | 1  | 25,2  |
| G-CSF 221-13-1i      | 140 | 5  | 55,8  |
| G-CSF 221-16-1i      | 140 | 8  | 122,6 |
| G-CSF 221-19-1i      | 140 | 14 | 159,2 |
| G-CSF 221-22-1i      | 140 | 5  | 68,1  |
| G-CSF 221-6-1i       | 140 | 4  | 42,7  |
| G-CSF 222-17-1i      | 140 | 5  | 57,7  |
| G-CSF 222-21-1i      | 140 | 8  | 85,1  |
| G-CSF 222-23-1i      | 140 | 2  | 43,9  |
| G-CSF 222-8-1i       | 140 | 2  | 33,7  |
| G-CSF 301-20-2i      | 140 | 3  | 36,1  |
| G-CSF 301-20-3i      | 140 | 6  | 81,4  |
| G-CSF 302-17-2i      | 140 | 1  | 10,2  |
| G-CSF 303-15-1i      | 140 | 1  | 10,8  |
| G-CSF 303-16-1i      | 140 | 4  | 128,3 |
| G-CSF 303-16-2i      | 140 | 1  | 13,8  |
| G-CSF 303-17-1i      | 140 | 1  | 13,1  |

basilar dendrite Sholl 150 $\mu$ m +

| Group   | Number    | Radius( $\mu$ m) | Intersections | Length( $\mu$ m) |
|---------|-----------|------------------|---------------|------------------|
| Control | 216-6-1i  | 150              | 2             | 24,1             |
| Control | 216-8-1i  | 150              | 0             | 3,4              |
| Control | 219-10-1i | 150              | 1             | 21,3             |
| Control | 219-14-1i | 150              | 4             | 41,7             |
| Control | 219-15-1i | 150              | 2             | 20,6             |
| Control | 219-17-1i | 150              | 1             | 11,6             |
| Control | 219-21-1i | 150              | 3             | 31,4             |
| Control | 297-22-1i | 150              | 1             | 10,2             |
| Control | 298-15-1i | 150              | 0             | 4                |
| Control | 298-18-1i | 150              | 2             | 25,2             |
| Control | 216-6-1i  | 160              | 0             | 21,3             |

|         |           |     |   |      |
|---------|-----------|-----|---|------|
| Control | 219-10-1i | 160 | 1 | 11,3 |
| Control | 219-14-1i | 160 | 2 | 40,2 |
| Control | 219-15-1i | 160 | 2 | 21   |
| Control | 219-17-1i | 160 | 1 | 10,4 |
| Control | 219-21-1i | 160 | 1 | 15,3 |
| Control | 297-22-1i | 160 | 1 | 10,2 |
| Control | 298-18-1i | 160 | 2 | 21,4 |
| Control | 219-10-1i | 170 | 1 | 10,7 |
| Control | 219-14-1i | 170 | 2 | 21,8 |
| Control | 219-15-1i | 170 | 1 | 10,3 |
| Control | 219-17-1i | 170 | 0 | 3    |
| Control | 219-21-1i | 170 | 1 | 10,4 |
| Control | 297-22-1i | 170 | 1 | 14,1 |
| Control | 298-18-1i | 170 | 1 | 22   |
| Control | 219-10-1i | 180 | 1 | 10,6 |
| Control | 219-14-1i | 180 | 2 | 21,6 |
| Control | 219-15-1i | 180 | 1 | 10,6 |
| Control | 219-21-1i | 180 | 1 | 11   |
| Control | 297-22-1i | 180 | 0 | 1,8  |
| Control | 298-18-1i | 180 | 1 | 12,8 |
| Control | 219-10-1i | 190 | 1 | 10,4 |
| Control | 219-14-1i | 190 | 2 | 21,4 |
| Control | 219-15-1i | 190 | 1 | 10,4 |
| Control | 219-21-1i | 190 | 0 | 10,7 |
| Control | 298-18-1i | 190 | 1 | 11,2 |
| Control | 219-10-1i | 200 | 1 | 10,2 |
| Control | 219-14-1i | 200 | 2 | 21,2 |
| Control | 219-15-1i | 200 | 0 | 0,4  |
| Control | 298-18-1i | 200 | 1 | 11   |
| Control | 219-10-1i | 210 | 0 | 3,4  |
| Control | 219-14-1i | 210 | 1 | 15,2 |
| Control | 298-18-1i | 210 | 0 | 3,4  |
| Control | 219-14-1i | 220 | 0 | 4    |
| CIMT    | 211-10-1i | 150 | 0 | 11,8 |
| CIMT    | 211-13-1i | 150 | 1 | 16,9 |
| CIMT    | 211-14-1i | 150 | 0 | 7    |
| CIMT    | 211-15-1i | 150 | 2 | 20,9 |
| CIMT    | 211-15-2i | 150 | 1 | 16,5 |
| CIMT    | 212-14-1i | 150 | 1 | 12,6 |
| CIMT    | 212-15-1i | 150 | 1 | 12,1 |
| CIMT    | 299-16-1i | 150 | 0 | 3,9  |
| CIMT    | 300-22-1i | 150 | 3 | 48   |
| CIMT    | 300-24-2i | 150 | 2 | 21,6 |
| CIMT    | 309-15-1i | 150 | 0 | 6,2  |
| CIMT    | 309-15-2i | 150 | 0 | 8,2  |
| CIMT    | 309-16-2i | 150 | 1 | 10,9 |
| CIMT    | 309-17-1i | 150 | 4 | 43,4 |
| CIMT    | 211-13-1i | 160 | 0 | 6,6  |
| CIMT    | 211-15-1i | 160 | 2 | 30,5 |
| CIMT    | 211-15-2i | 160 | 1 | 10,2 |
| CIMT    | 212-14-1i | 160 | 0 | 6,6  |
| CIMT    | 212-15-1i | 160 | 1 | 11,3 |
| CIMT    | 300-22-1i | 160 | 3 | 32,2 |
| CIMT    | 300-24-2i | 160 | 2 | 22,1 |
| CIMT    | 309-16-2i | 160 | 1 | 10,4 |
| CIMT    | 309-17-1i | 160 | 4 | 41,2 |



|            |           |     |    |       |
|------------|-----------|-----|----|-------|
| CIMT       | 211-15-1i | 170 | 1  | 15,5  |
| CIMT       | 211-15-2i | 170 | 1  | 17,2  |
| CIMT       | 212-15-1i | 170 | 1  | 13,4  |
| CIMT       | 300-22-1i | 170 | 2  | 24    |
| CIMT       | 300-24-2i | 170 | 0  | 15,9  |
| CIMT       | 309-16-2i | 170 | 0  | 5,6   |
| CIMT       | 309-17-1i | 170 | 2  | 29,6  |
| CIMT       | 211-15-1i | 180 | 0  | 9,9   |
| CIMT       | 211-15-2i | 180 | 1  | 10,9  |
| CIMT       | 212-15-1i | 180 | 0  | 10,9  |
| CIMT       | 300-22-1i | 180 | 2  | 25,8  |
| CIMT       | 309-17-1i | 180 | 1  | 16,3  |
| CIMT       | 211-15-2i | 190 | 0  | 9,2   |
| CIMT       | 300-22-1i | 190 | 2  | 22,2  |
| CIMT       | 309-17-1i | 190 | 1  | 10,2  |
| CIMT       | 300-22-1i | 200 | 1  | 12    |
| CIMT       | 309-17-1i | 200 | 0  | 8,6   |
| CIMT       | 300-22-1i | 210 | 1  | 11,8  |
| CIMT       | 300-22-1i | 220 | 0  | 8,2   |
| CIMT       | 218-16-1i | 150 | 5  | 71,9  |
| CIMT       | 218-17-1i | 150 | 1  | 10,3  |
| CIMT       | 218-19-1i | 150 | 2  | 23,2  |
| CIMT       | 218-16-1i | 160 | 3  | 43,1  |
| CIMT       | 218-17-1i | 160 | 1  | 11,1  |
| CIMT       | 218-19-1i | 160 | 1  | 26,9  |
| CIMT       | 218-16-1i | 170 | 2  | 28,9  |
| CIMT       | 218-17-1i | 170 | 1  | 12,7  |
| CIMT       | 218-19-1i | 170 | 1  | 12,6  |
| CIMT       | 218-16-1i | 180 | 2  | 22,5  |
| CIMT       | 218-17-1i | 180 | 0  | 6,7   |
| CIMT       | 218-19-1i | 180 | 0  | 6,3   |
| CIMT       | 218-16-1i | 190 | 2  | 21,2  |
| CIMT       | 218-16-1i | 200 | 1  | 20,6  |
| CIMT       | 218-16-1i | 210 | 0  | 0,1   |
| CIMT+G-CSF | 214-18-1i | 150 | 0  | 12,1  |
| CIMT+G-CSF | 217-16-1i | 150 | 10 | 111,3 |
| CIMT+G-CSF | 217-17-1i | 150 | 4  | 44,7  |
| CIMT+G-CSF | 217-6-1i  | 150 | 2  | 25,8  |
| CIMT+G-CSF | 217-8-1i  | 150 | 1  | 14,5  |
| CIMT+G-CSF | 304-19-1i | 150 | 0  | 3,4   |
| CIMT+G-CSF | 304-21-1i | 150 | 0  | 13,6  |
| CIMT+G-CSF | 305-17-1i | 150 | 0  | 11,7  |
| CIMT+G-CSF | 217-16-1i | 160 | 9  | 125,7 |
| CIMT+G-CSF | 217-17-1i | 160 | 5  | 59,4  |
| CIMT+G-CSF | 217-6-1i  | 160 | 2  | 23,9  |
| CIMT+G-CSF | 217-8-1i  | 160 | 0  | 9,6   |
| CIMT+G-CSF | 217-16-1i | 170 | 7  | 106   |
| CIMT+G-CSF | 217-17-1i | 170 | 3  | 43,6  |
| CIMT+G-CSF | 217-6-1i  | 170 | 2  | 23,5  |
| CIMT+G-CSF | 217-16-1i | 180 | 2  | 56,8  |
| CIMT+G-CSF | 217-17-1i | 180 | 3  | 61    |
| CIMT+G-CSF | 217-6-1i  | 180 | 2  | 22,3  |
| CIMT+G-CSF | 217-16-1i | 190 | 2  | 20,7  |
| CIMT+G-CSF | 217-17-1i | 190 | 2  | 27,5  |
| CIMT+G-CSF | 217-6-1i  | 190 | 2  | 24,6  |
| CIMT+G-CSF | 217-16-1i | 200 | 1  | 19,3  |

|                      |     |    |       |
|----------------------|-----|----|-------|
| CIMT+G-CSF 217-17-1i | 200 | 2  | 21,9  |
| CIMT+G-CSF 217-6-1i  | 200 | 1  | 17,1  |
| CIMT+G-CSF 217-16-1i | 210 | 1  | 11,3  |
| CIMT+G-CSF 217-17-1i | 210 | 0  | 3,4   |
| CIMT+G-CSF 217-6-1i  | 210 | 1  | 10,4  |
| CIMT+G-CSF 217-16-1i | 220 | 1  | 10,7  |
| CIMT+G-CSF 217-6-1i  | 220 | 1  | 10,2  |
| CIMT+G-CSF 217-16-1i | 230 | 1  | 10,3  |
| CIMT+G-CSF 217-6-1i  | 230 | 1  | 11    |
| CIMT+G-CSF 217-16-1i | 240 | 1  | 10,7  |
| CIMT+G-CSF 217-6-1i  | 240 | 0  | 11,6  |
| CIMT+G-CSF 217-16-1i | 250 | 1  | 10,5  |
| CIMT+G-CSF 217-16-1i | 260 | 1  | 10,3  |
| CIMT+G-CSF 217-16-1i | 270 | 1  | 10,3  |
| CIMT+G-CSF 217-16-1i | 280 | 0  | 2,9   |
| CIMT/G-CSF 311-16-1i | 150 | 0  | 19,5  |
| CIMT/G-CSF 311-17-1i | 150 | 4  | 79,8  |
| CIMT/G-CSF 311-17-2i | 150 | 11 | 123,7 |
| CIMT/G-CSF 311-18-1i | 150 | 1  | 48,2  |
| CIMT/G-CSF 311-19-1i | 150 | 0  | 6,7   |
| CIMT/G-CSF 313-15-1i | 150 | 1  | 13,4  |
| CIMT/G-CSF 313-17-1i | 150 | 1  | 13,3  |
| CIMT/G-CSF 314-16-1i | 150 | 1  | 16    |
| CIMT/G-CSF 314-17-1i | 150 | 4  | 63,8  |
| CIMT/G-CSF 314-17-2i | 150 | 1  | 14,7  |
| CIMT/G-CSF 315-13-1i | 150 | 2  | 30,3  |
| CIMT/G-CSF 315-13-2i | 150 | 1  | 16,9  |
| CIMT/G-CSF 311-17-1i | 160 | 3  | 43,7  |
| CIMT/G-CSF 311-17-2i | 160 | 11 | 137,7 |
| CIMT/G-CSF 311-18-1i | 160 | 0  | 9     |
| CIMT/G-CSF 313-15-1i | 160 | 1  | 10,5  |
| CIMT/G-CSF 313-17-1i | 160 | 1  | 19,8  |
| CIMT/G-CSF 314-16-1i | 160 | 1  | 11,1  |
| CIMT/G-CSF 314-17-1i | 160 | 4  | 49,4  |
| CIMT/G-CSF 314-17-2i | 160 | 0  | 2,3   |
| CIMT/G-CSF 315-13-1i | 160 | 0  | 20,4  |
| CIMT/G-CSF 315-13-2i | 160 | 0  | 0,8   |
| CIMT/G-CSF 311-17-1i | 170 | 2  | 38,5  |
| CIMT/G-CSF 311-17-2i | 170 | 7  | 120,1 |
| CIMT/G-CSF 313-15-1i | 170 | 1  | 11,4  |
| CIMT/G-CSF 313-17-1i | 170 | 0  | 14,7  |
| CIMT/G-CSF 314-16-1i | 170 | 0  | 13,5  |
| CIMT/G-CSF 314-17-1i | 170 | 4  | 50,4  |
| CIMT/G-CSF 311-17-1i | 180 | 2  | 24,8  |
| CIMT/G-CSF 311-17-2i | 180 | 4  | 57,4  |
| CIMT/G-CSF 313-15-1i | 180 | 1  | 10,8  |
| CIMT/G-CSF 314-17-1i | 180 | 2  | 36,4  |
| CIMT/G-CSF 311-17-1i | 190 | 0  | 2,3   |
| CIMT/G-CSF 311-17-2i | 190 | 4  | 56,4  |
| CIMT/G-CSF 313-15-1i | 190 | 0  | 11,9  |
| CIMT/G-CSF 314-17-1i | 190 | 2  | 25,8  |
| CIMT/G-CSF 311-17-2i | 200 | 5  | 51,4  |
| CIMT/G-CSF 314-17-1i | 200 | 2  | 26,1  |
| CIMT/G-CSF 311-17-2i | 210 | 4  | 46,3  |
| CIMT/G-CSF 314-17-1i | 210 | 2  | 24,2  |
| CIMT/G-CSF 311-17-2i | 220 | 3  | 41,2  |

|            |           |     |    |       |
|------------|-----------|-----|----|-------|
| CIMT/G-CSF | 314-17-1i | 220 | 2  | 21    |
| CIMT/G-CSF | 311-17-2i | 230 | 1  | 22,6  |
| CIMT/G-CSF | 314-17-1i | 230 | 1  | 18,4  |
| CIMT/G-CSF | 311-17-2i | 240 | 0  | 3,9   |
| CIMT/G-CSF | 314-17-1i | 240 | 0  | 2,6   |
| G-CSF      | 220-16-1i | 150 | 1  | 11,1  |
| G-CSF      | 220-17-1i | 150 | 1  | 11,5  |
| G-CSF      | 220-19-1i | 150 | 3  | 34    |
| G-CSF      | 220-7-1i  | 150 | 1  | 10,3  |
| G-CSF      | 221-13-1i | 150 | 2  | 54,3  |
| G-CSF      | 221-16-1i | 150 | 7  | 86,1  |
| G-CSF      | 221-19-1i | 150 | 13 | 153,7 |
| G-CSF      | 221-22-1i | 150 | 4  | 50,9  |
| G-CSF      | 221-6-1i  | 150 | 5  | 51,2  |
| G-CSF      | 222-17-1i | 150 | 4  | 52    |
| G-CSF      | 222-21-1i | 150 | 8  | 85,7  |
| G-CSF      | 222-23-1i | 150 | 2  | 22,7  |
| G-CSF      | 222-8-1i  | 150 | 1  | 15    |
| G-CSF      | 301-20-2i | 150 | 3  | 53,7  |
| G-CSF      | 301-20-3i | 150 | 4  | 49,8  |
| G-CSF      | 302-17-2i | 150 | 1  | 10,4  |
| G-CSF      | 303-15-1i | 150 | 1  | 14,9  |
| G-CSF      | 303-16-1i | 150 | 3  | 42,4  |
| G-CSF      | 303-16-2i | 150 | 1  | 12,9  |
| G-CSF      | 303-17-1i | 150 | 0  | 8,8   |
| G-CSF      | 220-16-1i | 160 | 0  | 3,4   |
| G-CSF      | 220-17-1i | 160 | 1  | 10,6  |
| G-CSF      | 220-19-1i | 160 | 2  | 27,8  |
| G-CSF      | 220-7-1i  | 160 | 1  | 10,3  |
| G-CSF      | 221-13-1i | 160 | 1  | 12,8  |
| G-CSF      | 221-16-1i | 160 | 6  | 72,4  |
| G-CSF      | 221-19-1i | 160 | 10 | 125,4 |
| G-CSF      | 221-22-1i | 160 | 4  | 46,4  |
| G-CSF      | 221-6-1i  | 160 | 5  | 58,3  |
| G-CSF      | 222-17-1i | 160 | 3  | 32,8  |
| G-CSF      | 222-21-1i | 160 | 6  | 80,6  |
| G-CSF      | 222-23-1i | 160 | 1  | 18,9  |
| G-CSF      | 222-8-1i  | 160 | 1  | 10,4  |
| G-CSF      | 301-20-2i | 160 | 3  | 39,1  |
| G-CSF      | 301-20-3i | 160 | 2  | 26,4  |
| G-CSF      | 302-17-2i | 160 | 1  | 10,4  |
| G-CSF      | 303-15-1i | 160 | 1  | 11    |
| G-CSF      | 303-16-1i | 160 | 3  | 53,9  |
| G-CSF      | 303-16-2i | 160 | 1  | 31,4  |
| G-CSF      | 220-17-1i | 170 | 1  | 11,5  |
| G-CSF      | 220-19-1i | 170 | 2  | 23,9  |
| G-CSF      | 220-7-1i  | 170 | 2  | 23,5  |
| G-CSF      | 221-13-1i | 170 | 1  | 10,2  |
| G-CSF      | 221-16-1i | 170 | 5  | 59,3  |
| G-CSF      | 221-19-1i | 170 | 9  | 121,3 |
| G-CSF      | 221-22-1i | 170 | 3  | 49,1  |
| G-CSF      | 221-6-1i  | 170 | 4  | 56,3  |
| G-CSF      | 222-17-1i | 170 | 3  | 32,4  |
| G-CSF      | 222-21-1i | 170 | 5  | 62,2  |
| G-CSF      | 222-23-1i | 170 | 0  | 2,4   |
| G-CSF      | 222-8-1i  | 170 | 1  | 10,6  |

|       |           |     |   |      |
|-------|-----------|-----|---|------|
| G-CSF | 301-20-2i | 170 | 3 | 42,4 |
| G-CSF | 301-20-3i | 170 | 0 | 1,5  |
| G-CSF | 302-17-2i | 170 | 1 | 10,5 |
| G-CSF | 303-15-1i | 170 | 1 | 10,7 |
| G-CSF | 303-16-1i | 170 | 2 | 35   |
| G-CSF | 303-16-2i | 170 | 1 | 13,3 |
| G-CSF | 220-17-1i | 180 | 1 | 10,8 |
| G-CSF | 220-19-1i | 180 | 1 | 24,6 |
| G-CSF | 220-7-1i  | 180 | 2 | 22,8 |
| G-CSF | 221-13-1i | 180 | 1 | 11   |
| G-CSF | 221-16-1i | 180 | 5 | 53,5 |
| G-CSF | 221-19-1i | 180 | 6 | 76,1 |
| G-CSF | 221-22-1i | 180 | 3 | 34,1 |
| G-CSF | 221-6-1i  | 180 | 3 | 37,8 |
| G-CSF | 222-17-1i | 180 | 0 | 16   |
| G-CSF | 222-21-1i | 180 | 4 | 45,6 |
| G-CSF | 222-8-1i  | 180 | 1 | 10,5 |
| G-CSF | 301-20-2i | 180 | 1 | 28,1 |
| G-CSF | 302-17-2i | 180 | 0 | 8,3  |
| G-CSF | 303-15-1i | 180 | 1 | 10,5 |
| G-CSF | 303-16-1i | 180 | 2 | 22,6 |
| G-CSF | 303-16-2i | 180 | 0 | 5,5  |
| G-CSF | 220-17-1i | 190 | 1 | 10,9 |
| G-CSF | 220-19-1i | 190 | 1 | 13,4 |
| G-CSF | 220-7-1i  | 190 | 2 | 21,9 |
| G-CSF | 221-13-1i | 190 | 0 | 1,2  |
| G-CSF | 221-16-1i | 190 | 5 | 69,2 |
| G-CSF | 221-19-1i | 190 | 4 | 62,6 |
| G-CSF | 221-22-1i | 190 | 1 | 17,9 |
| G-CSF | 221-6-1i  | 190 | 3 | 38,9 |
| G-CSF | 222-21-1i | 190 | 4 | 41   |
| G-CSF | 222-8-1i  | 190 | 1 | 11,2 |
| G-CSF | 301-20-2i | 190 | 1 | 11,7 |
| G-CSF | 303-15-1i | 190 | 1 | 12,5 |
| G-CSF | 303-16-1i | 190 | 2 | 24,7 |
| G-CSF | 220-17-1i | 200 | 0 | 9,6  |
| G-CSF | 220-19-1i | 200 | 1 | 10,4 |
| G-CSF | 220-7-1i  | 200 | 1 | 16,7 |
| G-CSF | 221-16-1i | 200 | 2 | 54,8 |
| G-CSF | 221-19-1i | 200 | 1 | 36,3 |
| G-CSF | 221-22-1i | 200 | 1 | 11,5 |
| G-CSF | 221-6-1i  | 200 | 2 | 29,5 |
| G-CSF | 222-21-1i | 200 | 4 | 49,2 |
| G-CSF | 222-8-1i  | 200 | 1 | 11,3 |
| G-CSF | 301-20-2i | 200 | 1 | 11,1 |
| G-CSF | 303-15-1i | 200 | 1 | 11   |
| G-CSF | 303-16-1i | 200 | 2 | 23,8 |
| G-CSF | 220-19-1i | 210 | 1 | 10,3 |
| G-CSF | 220-7-1i  | 210 | 0 | 6,1  |
| G-CSF | 221-16-1i | 210 | 2 | 25   |
| G-CSF | 221-19-1i | 210 | 1 | 11,5 |
| G-CSF | 221-22-1i | 210 | 0 | 2,3  |
| G-CSF | 221-6-1i  | 210 | 0 | 13,6 |
| G-CSF | 222-21-1i | 210 | 1 | 39,2 |
| G-CSF | 222-8-1i  | 210 | 1 | 10,4 |
| G-CSF | 301-20-2i | 210 | 0 | 1    |

|       |           |     |   |      |
|-------|-----------|-----|---|------|
| G-CSF | 303-15-1i | 210 | 1 | 10,8 |
| G-CSF | 303-16-1i | 210 | 2 | 22,3 |
| G-CSF | 220-19-1i | 220 | 1 | 10,3 |
| G-CSF | 221-16-1i | 220 | 2 | 24,3 |
| G-CSF | 221-19-1i | 220 | 1 | 10,3 |
| G-CSF | 222-21-1i | 220 | 1 | 10,3 |
| G-CSF | 222-8-1i  | 220 | 0 | 5,4  |
| G-CSF | 303-15-1i | 220 | 1 | 11,1 |
| G-CSF | 303-16-1i | 220 | 2 | 23,5 |
| G-CSF | 220-19-1i | 230 | 1 | 11,1 |
| G-CSF | 221-16-1i | 230 | 1 | 16,9 |
| G-CSF | 221-19-1i | 230 | 1 | 10,4 |
| G-CSF | 222-21-1i | 230 | 1 | 10,1 |
| G-CSF | 303-15-1i | 230 | 0 | 5,8  |
| G-CSF | 303-16-1i | 230 | 2 | 24,5 |
| G-CSF | 220-19-1i | 240 | 0 | 2,8  |
| G-CSF | 221-16-1i | 240 | 1 | 11,1 |
| G-CSF | 221-19-1i | 240 | 1 | 11,6 |
| G-CSF | 222-21-1i | 240 | 1 | 10,4 |
| G-CSF | 303-16-1i | 240 | 1 | 27,5 |
| G-CSF | 221-16-1i | 250 | 1 | 10,6 |
| G-CSF | 221-19-1i | 250 | 0 | 2,6  |
| G-CSF | 222-21-1i | 250 | 1 | 10,8 |
| G-CSF | 303-16-1i | 250 | 0 | 3    |
| G-CSF | 221-16-1i | 260 | 0 | 9,5  |
| G-CSF | 222-21-1i | 260 | 0 | 5,2  |
