# Supplementary material for: Functional Improvement after Photothrombotic Stroke in Rats Is Associated with Different Patterns of Dendritic Plasticity after G-CSF Treatment and G-CSF Treatment Combined with Concomitant or Sequential Constraint-Induced Movement Therapy
Source: PubMed Central journal article supplement (PMC4713830; doi:10.1371/journal.pone.0146679), 2016-01-11
Supplement: pone.0146679.s002.pdf [file pone.0146679.s002.pdf]

**Data Figure 2**

**basilar dendrites summary corresponding contralateral cortex**

| <b>Group</b> | <b>Number</b> | <b>Name</b> | <b>Qty</b> | <b>Length (µm)</b> | <b>mean length (µm)</b> |
|--------------|---------------|-------------|------------|--------------------|-------------------------|
| control      | V215-10_1     | basilar     | 6          | 480,3              | 80,1                    |
| control      | V215-10_2     | basilar     | 8          | 2557,1             | 319,6                   |
| control      | V215-11_1     | basilar     | 7          | 854,2              | 122                     |
| control      | V215-12_1     | basilar     | 7          | 966,2              | 138                     |
| control      | V215-12_2     | basilar     | 6          | 1519,3             | 253,2                   |
| control      | V215-13_1     | basilar     | 7          | 1129,2             | 161,3                   |
| control      | V215-15_1     | basilar     | 5          | 357,2              | 71,4                    |
| control      | V215-15_2     | basilar     | 6          | 819,2              | 136,5                   |
| control      | V215-16_1     | basilar     | 6          | 800,9              | 133,5                   |
| control      | V215-18_1     | basilar     | 5          | 655                | 131                     |
| control      | V216-11_1     | basilar     | 4          | 715,1              | 178,8                   |
| control      | V216-12_1     | basilar     | 5          | 563                | 112,6                   |
| control      | V216-13_1     | basilar     | 5          | 431,1              | 86,2                    |
| control      | V216-14_1     | basilar     | 6          | 731                | 121,8                   |
| control      | V216-14_2     | basilar     | 6          | 481,4              | 80,2                    |
| control      | V216-16_1     | basilar     | 6          | 348,2              | 58                      |
| control      | V216-16_2     | basilar     | 4          | 982,4              | 245,6                   |
| control      | V216-17_1     | basilar     | 6          | 614,8              | 102,5                   |
| control      | V216-18_1     | basilar     | 5          | 432,3              | 86,5                    |
| control      | V216-18_2     | basilar     | 9          | 946,1              | 105,1                   |
| control      | V219-6_1      | basilar     | 8          | 3217,9             | 402,2                   |
| control      | V219-11_1     | basilar     | 7          | 1916,8             | 273,8                   |
| control      | V219-12_1     | basilar     | 8          | 1623               | 202,9                   |
| control      | V219-13_1     | basilar     | 7          | 940,8              | 134,4                   |
| control      | V219-13_2     | basilar     | 7          | 628,9              | 89,8                    |
| control      | V219-14_1     | basilar     | 7          | 595                | 85                      |
| control      | V219-14_2     | basilar     | 10         | 1858,7             | 185,9                   |
| control      | V219-16_1     | basilar     | 5          | 976,2              | 195,2                   |
| control      | V297-19_1     | basilar     | 8          | 1713,5             | 214,2                   |
| control      | V297-19_2     | basilar     | 6          | 656,3              | 109,4                   |
| control      | V297-20_1     | basilar     | 10         | 679                | 67,9                    |
| control      | V297-20_2     | basilar     | 5          | 467                | 93,4                    |
| control      | V297-20_3     | basilar     | 5          | 1355               | 271                     |
| control      | V297-22_1     | basilar     | 5          | 2076,1             | 415,2                   |
| control      | V297-22_2     | basilar     | 5          | 480,1              | 96                      |
| control      | V298-15_1     | basilar     | 7          | 2260,2             | 322,9                   |
| control      | V298-16_1     | basilar     | 3          | 476,2              | 158,7                   |
| control      | V298-16_2     | basilar     | 7          | 823,5              | 117,6                   |
| control      | V298-16_3     | basilar     | 3          | 320,4              | 106,8                   |
| control      | V298-17_1     | basilar     | 5          | 430,3              | 86,1                    |
| control      | V298-17_2     | basilar     | 7          | 1671,3             | 238,8                   |
| control      | V298-17_3     | basilar     | 8          | 2063,6             | 257,9                   |
| control      | V308-17_1     | basilar     | 7          | 883,8              | 126,3                   |
| control      | V308-17_2     | basilar     | 8          | 1797,4             | 224,7                   |
| control      | V308-17_3     | basilar     | 6          | 1499,2             | 249,9                   |
| control      | V308-17_4     | basilar     | 5          | 1146,9             | 229,4                   |
| control      | V308-18_1     | basilar     | 8          | 1229,5             | 153,7                   |
| control      | V308-18_2     | basilar     | 6          | 1045,1             | 174,2                   |
| control      | V308-18_3     | basilar     | 6          | 1896,1             | 316                     |
| CIMT         | V211-10_1     | basilar     | 11         | 3488,5             | 317,1                   |
| CIMT         | V211-10_2     | basilar     | 9          | 1611               | 179                     |

|       |           |         |    |        |       |
|-------|-----------|---------|----|--------|-------|
| CIMT  | V211-11_1 | basilar | 5  | 540,6  | 108,1 |
| CIMT  | V211-11_2 | basilar | 9  | 595,4  | 66,2  |
| CIMT  | V211-12_1 | basilar | 5  | 1222,9 | 244,6 |
| CIMT  | V211-13_1 | basilar | 4  | 764,8  | 191,2 |
| CIMT  | V211-13_2 | basilar | 7  | 1475,8 | 210,8 |
| CIMT  | V211-15_1 | basilar | 9  | 710,4  | 78,9  |
| CIMT  | V211-15_2 | basilar | 7  | 1030,9 | 147,3 |
| CIMT  | V211-16_1 | basilar | 10 | 1200,1 | 120   |
| CIMT  | V212-14_1 | basilar | 5  | 1763,1 | 352,6 |
| CIMT  | V212-14_2 | basilar | 5  | 2619,6 | 523,9 |
| CIMT  | V212-15_1 | basilar | 5  | 1951,3 | 390,3 |
| CIMT  | V212-18_1 | basilar | 4  | 1154,1 | 288,5 |
| CIMT  | V212-21_1 | basilar | 6  | 1150,9 | 191,8 |
| CIMT  | V212-21_2 | basilar | 8  | 2820,2 | 352,5 |
| CIMT  | V212-22_1 | basilar | 8  | 946,5  | 118,3 |
| CIMT  | V212-23_1 | basilar | 5  | 1009,7 | 201,9 |
| CIMT  | V212-23_2 | basilar | 6  | 4410,4 | 735,1 |
| CIMT  | V212-24_1 | basilar | 6  | 757,9  | 126,3 |
| CIMT  | V299-14_1 | basilar | 5  | 777,7  | 155,5 |
| CIMT  | V299-15_1 | basilar | 3  | 249,9  | 83,3  |
| CIMT  | V299-15_2 | basilar | 5  | 269,3  | 53,9  |
| CIMT  | V299-16_1 | basilar | 7  | 681,8  | 97,4  |
| CIMT  | V299-16_2 | basilar | 8  | 1307   | 163,4 |
| CIMT  | V299-17_1 | basilar | 7  | 1588   | 226,9 |
| CIMT  | V299-17_2 | basilar | 6  | 849,7  | 141,6 |
| CIMT  | V300-16_1 | basilar | 5  | 1504,2 | 300,8 |
| CIMT  | V300-18_1 | basilar | 7  | 793,7  | 113,4 |
| CIMT  | V300-18_2 | basilar | 7  | 1421,4 | 203,1 |
| CIMT  | V300-20_1 | basilar | 6  | 1074,6 | 179,1 |
| CIMT  | V300-22_1 | basilar | 8  | 2044,2 | 255,5 |
| CIMT  | V300-23_1 | basilar | 6  | 855,7  | 142,6 |
| CIMT  | V300-23_2 | basilar | 4  | 653,3  | 163,3 |
| CIMT  | V309-15_1 | basilar | 6  | 692    | 115,3 |
| CIMT  | V309-15_2 | basilar | 5  | 914,5  | 182,9 |
| CIMT  | V309-16_1 | basilar | 8  | 1200,6 | 150,1 |
| CIMT  | V309-16_2 | basilar | 8  | 481    | 60,1  |
| CIMT  | V309-16_3 | basilar | 7  | 1384,7 | 197,8 |
| CIMT  | V309-17_1 | basilar | 7  | 1061,5 | 151,6 |
| CIMT  | V309-17_2 | basilar | 5  | 2055,2 | 411   |
| CIMT  | V218-9_1  | basilar | 5  | 682,5  | 136,5 |
| CIMT  | V218-10_1 | basilar | 11 | 1617,8 | 147,1 |
| CIMT  | V218-11_1 | basilar | 6  | 2190,1 | 365   |
| CIMT  | V218-12_1 | basilar | 7  | 1780   | 254,3 |
| CIMT  | V218-12_2 | basilar | 6  | 926,9  | 154,5 |
| CIMT  | V218-13_1 | basilar | 6  | 834,9  | 139,2 |
| CIMT  | V218-15_1 | basilar | 4  | 838,8  | 209,7 |
| CIMT  | V218-17_1 | basilar | 5  | 1010,1 | 202   |
| G-CSF | V220-9_1  | basilar | 9  | 1870,6 | 207,8 |
| G-CSF | V220-11_1 | basilar | 5  | 338,1  | 67,6  |
| G-CSF | V220-12_1 | basilar | 7  | 867,9  | 124   |
| G-CSF | V220-16_1 | basilar | 4  | 1439,5 | 359,9 |
| G-CSF | V220-16_2 | basilar | 6  | 692,2  | 115,4 |
| G-CSF | V220-17_1 | basilar | 6  | 1813,8 | 302,3 |
| G-CSF | V220-18_1 | basilar | 4  | 840,8  | 210,2 |
| G-CSF | V221-2_1  | basilar | 8  | 1302,2 | 162,8 |
| G-CSF | V221-4_1  | basilar | 5  | 244,7  | 48,9  |

|            |           |         |    |        |       |
|------------|-----------|---------|----|--------|-------|
| G-CSF      | V221-5_1  | basilar | 10 | 306,7  | 30,7  |
| G-CSF      | V221-6_1  | basilar | 4  | 1061,8 | 265,4 |
| G-CSF      | V221-7_1  | basilar | 5  | 762,2  | 152,4 |
| G-CSF      | V221-7_2  | basilar | 6  | 1780,8 | 296,8 |
| G-CSF      | V221-11_1 | basilar | 3  | 371,3  | 123,8 |
| G-CSF      | V221-13_1 | basilar | 12 | 3151,1 | 262,6 |
| G-CSF      | V221-15_1 | basilar | 5  | 424,2  | 84,8  |
| G-CSF      | V221-20_1 | basilar | 11 | 1252,8 | 113,9 |
| G-CSF      | V222-19_1 | basilar | 9  | 1946,2 | 216,2 |
| G-CSF      | V222-19_2 | basilar | 10 | 583,3  | 58,3  |
| G-CSF      | V222-20_1 | basilar | 12 | 1731,4 | 144,3 |
| G-CSF      | V222-20_2 | basilar | 4  | 1064,8 | 266,2 |
| G-CSF      | V222-21_1 | basilar | 8  | 2504,3 | 313   |
| G-CSF      | V222-22_1 | basilar | 6  | 1326,5 | 221,1 |
| G-CSF      | V222-22_2 | basilar | 8  | 1675,1 | 209,4 |
| G-CSF      | V222-23_1 | basilar | 8  | 1956,8 | 244,6 |
| G-CSF      | V222-24_1 | basilar | 7  | 1708   | 244   |
| G-CSF      | V301-18_1 | basilar | 7  | 893,4  | 127,6 |
| G-CSF      | V301-18_2 | basilar | 6  | 865,4  | 144,2 |
| G-CSF      | V301-18_3 | basilar | 4  | 495,9  | 124   |
| G-CSF      | V301-19_1 | basilar | 5  | 702,6  | 140,5 |
| G-CSF      | V301-19_2 | basilar | 9  | 789,7  | 87,7  |
| G-CSF      | V301-20_1 | basilar | 6  | 882,7  | 147,1 |
| G-CSF      | V301-20_2 | basilar | 9  | 1206,7 | 134,1 |
| G-CSF      | V302-15_1 | basilar | 4  | 644,4  | 161,1 |
| G-CSF      | V302-15_2 | basilar | 6  | 936,7  | 156,1 |
| G-CSF      | V302-15_3 | basilar | 5  | 709    | 141,8 |
| G-CSF      | V302-16_1 | basilar | 3  | 369,7  | 123,2 |
| G-CSF      | V302-16_2 | basilar | 3  | 191,2  | 63,7  |
| G-CSF      | V302-16_3 | basilar | 5  | 603,6  | 120,7 |
| G-CSF      | V302-16_4 | basilar | 5  | 877    | 175,4 |
| G-CSF      | V302-17_1 | basilar | 10 | 2361,3 | 236,1 |
| G-CSF      | V302-17_2 | basilar | 6  | 752    | 125,3 |
| G-CSF      | V302-17_3 | basilar | 4  | 585    | 146,3 |
| G-CSF      | V303-15_1 | basilar | 4  | 396,1  | 99    |
| G-CSF      | V303-15_2 | basilar | 7  | 870,9  | 124,4 |
| G-CSF      | V303-15_3 | basilar | 5  | 1205,3 | 241,1 |
| G-CSF      | V303-16_1 | basilar | 7  | 2162,9 | 309   |
| G-CSF      | V303-16_2 | basilar | 8  | 1196,7 | 149,6 |
| G-CSF      | V303-16_3 | basilar | 8  | 1155   | 144,4 |
| G-CSF      | V303-17_1 | basilar | 9  | 2169,8 | 241,1 |
| CIMT+G-CSF | V213-13_1 | basilar | 5  | 556    | 111,2 |
| CIMT+G-CSF | V213-16_1 | basilar | 3  | 283,6  | 94,5  |
| CIMT+G-CSF | V213-17_1 | basilar | 6  | 998,2  | 166,4 |
| CIMT+G-CSF | V213-17_2 | basilar | 4  | 1340,2 | 335,1 |
| CIMT+G-CSF | V213-18_1 | basilar | 5  | 1791,5 | 358,3 |
| CIMT+G-CSF | V213-18_2 | basilar | 3  | 772,7  | 257,6 |
| CIMT+G-CSF | V213-19_1 | basilar | 6  | 1249,5 | 208,2 |
| CIMT+G-CSF | V213-19_2 | basilar | 10 | 690,8  | 69,1  |
| CIMT+G-CSF | V213-20_1 | basilar | 4  | 573,6  | 143,4 |
| CIMT+G-CSF | V213-22_1 | basilar | 5  | 1444,6 | 288,9 |
| CIMT+G-CSF | V213-23_1 | basilar | 9  | 866    | 96,2  |
| CIMT+G-CSF | V214-14_1 | basilar | 8  | 1862   | 232,8 |
| CIMT+G-CSF | V214-17_1 | basilar | 5  | 1427,1 | 285,4 |
| CIMT+G-CSF | V214-18_1 | basilar | 9  | 2897,1 | 321,9 |
| CIMT+G-CSF | V214-19_1 | basilar | 5  | 650,6  | 130,1 |

|            |           |         |    |        |       |
|------------|-----------|---------|----|--------|-------|
| CIMT+G-CSF | V214-19_2 | basilar | 4  | 1142,4 | 285,6 |
| CIMT+G-CSF | V214-20_1 | basilar | 6  | 1669,2 | 278,2 |
| CIMT+G-CSF | V214-21_1 | basilar | 5  | 1076,2 | 215,2 |
| CIMT+G-CSF | V217-1_1  | basilar | 9  | 2910,3 | 323,4 |
| CIMT+G-CSF | V217-2_1  | basilar | 7  | 1582,6 | 226,1 |
| CIMT+G-CSF | V217-4_1  | basilar | 5  | 3923,5 | 784,7 |
| CIMT+G-CSF | V217-6_1  | basilar | 6  | 1092,1 | 182   |
| CIMT+G-CSF | V217-6_2  | basilar | 5  | 1616,4 | 323,3 |
| CIMT+G-CSF | V217-6_3  | basilar | 3  | 1502,6 | 500,9 |
| CIMT+G-CSF | V217-8_1  | basilar | 7  | 893,5  | 127,6 |
| CIMT+G-CSF | V217-8_4  | basilar | 6  | 1462   | 243,7 |
| CIMT+G-CSF | V217-10_1 | basilar | 9  | 670,6  | 74,5  |
| CIMT+G-CSF | V217-11_1 | basilar | 7  | 2564,2 | 366,3 |
| CIMT+G-CSF | V304-16_1 | basilar | 3  | 341,8  | 113,9 |
| CIMT+G-CSF | V304-17_1 | basilar | 6  | 988    | 164,7 |
| CIMT+G-CSF | V304-17_2 | basilar | 2  | 360,3  | 180,2 |
| CIMT+G-CSF | V304-17_3 | basilar | 6  | 1000,2 | 166,7 |
| CIMT+G-CSF | V304-17_4 | basilar | 5  | 1138,7 | 227,7 |
| CIMT+G-CSF | V304-19_1 | basilar | 4  | 447,6  | 111,9 |
| CIMT+G-CSF | V304-19_2 | basilar | 4  | 703,4  | 175,9 |
| CIMT+G-CSF | V305-17_1 | basilar | 6  | 351,1  | 58,5  |
| CIMT+G-CSF | V305-17_2 | basilar | 6  | 550,5  | 91,8  |
| CIMT+G-CSF | V305-17_3 | basilar | 8  | 711,8  | 89    |
| CIMT+G-CSF | V305-18_1 | basilar | 9  | 1274,8 | 141,6 |
| CIMT+G-CSF | V305-18_2 | basilar | 5  | 648,8  | 129,8 |
| CIMT+G-CSF | V305-18_3 | basilar | 6  | 324    | 54    |
| CIMT+G-CSF | V305-18_4 | basilar | 6  | 635,7  | 105,9 |
| CIMT+G-CSF | V305-19_1 | basilar | 4  | 227    | 56,7  |
| CIMT/G-CSF | V305-16_1 | basilar | 7  | 964,9  | 137,8 |
| CIMT/G-CSF | V305-16_2 | basilar | 5  | 583,4  | 116,7 |
| CIMT/G-CSF | V305-17_1 | basilar | 9  | 1494,2 | 166   |
| CIMT/G-CSF | V305-17_2 | basilar | 7  | 1458,4 | 208,3 |
| CIMT/G-CSF | V305-17_3 | basilar | 8  | 1089,5 | 136,2 |
| CIMT/G-CSF | V305-17_4 | basilar | 7  | 803,7  | 114,8 |
| CIMT/G-CSF | V305-17_5 | basilar | 5  | 512,9  | 102,6 |
| CIMT/G-CSF | V311-16_1 | basilar | 8  | 2715,1 | 339,4 |
| CIMT/G-CSF | V311-17_1 | basilar | 10 | 1861,2 | 186,1 |
| CIMT/G-CSF | V311-17_2 | basilar | 4  | 1031,2 | 257,8 |
| CIMT/G-CSF | V311-19_1 | basilar | 7  | 1226,4 | 175,2 |
| CIMT/G-CSF | V311-20_1 | basilar | 8  | 2671,2 | 333,9 |
| CIMT/G-CSF | V311-20_2 | basilar | 3  | 791,1  | 263,7 |
| CIMT/G-CSF | V311-20_3 | basilar | 6  | 768,1  | 128   |
| CIMT/G-CSF | V313-14_1 | basilar | 4  | 1245,5 | 311,4 |
| CIMT/G-CSF | V313-15_1 | basilar | 6  | 285,3  | 47,5  |
| CIMT/G-CSF | V313-15_2 | basilar | 5  | 821,9  | 164,4 |
| CIMT/G-CSF | V313-17_1 | basilar | 5  | 1445,3 | 289,1 |
| CIMT/G-CSF | V313-17_2 | basilar | 3  | 420,6  | 140,2 |
| CIMT/G-CSF | V313-17_3 | basilar | 5  | 212,1  | 42,4  |
| CIMT/G-CSF | V313-19_1 | basilar | 9  | 411,4  | 45,7  |
| CIMT/G-CSF | V314-16_1 | basilar | 5  | 483    | 96,6  |
| CIMT/G-CSF | V314-16_2 | basilar | 7  | 1091,6 | 155,9 |
| CIMT/G-CSF | V314-17_1 | basilar | 8  | 1140,1 | 142,5 |
| CIMT/G-CSF | V314-17_2 | basilar | 8  | 219,8  | 27,5  |
| CIMT/G-CSF | V314-17_3 | basilar | 8  | 905,1  | 113,1 |
| CIMT/G-CSF | V314-18_1 | basilar | 9  | 822    | 91,3  |
| CIMT/G-CSF | V314-18_2 | basilar | 9  | 1210,3 | 134,5 |

|            |           |         |   |        |       |
|------------|-----------|---------|---|--------|-------|
| CIMT/G-CSF | V315-11_1 | basilar | 4 | 852,2  | 213   |
| CIMT/G-CSF | V315-11_2 | basilar | 8 | 939    | 117,4 |
| CIMT/G-CSF | V315-13_1 | basilar | 6 | 1192,8 | 198,8 |
| CIMT/G-CSF | V315-13_2 | basilar | 6 | 2082   | 347   |
| CIMT/G-CSF | V315-14_1 | basilar | 6 | 926,2  | 154,4 |
| CIMT/G-CSF | V315-14_2 | basilar | 8 | 1104,9 | 138,1 |
| CIMT/G-CSF | V315-14_3 | basilar | 7 | 2328,6 | 332,7 |

### Data Figure 3

Dendrite length corresponding contralateral cortex

| Group      | animal no | length basilar | no of neurons | length per neuron |               |
|------------|-----------|----------------|---------------|-------------------|---------------|
|            |           |                |               | basilar           | length apical |
| Control    | 215       | 10138,6        | 10            | 1013,9            | 3898,6        |
| Control    | 216       | 6245,4         | 10            | 624,5             | 3997,5        |
| Control    | 219       | 10381,3        | 8             | 1297,7            | 4646,2        |
| Control    | 297       | 7427           | 7             | 1061,0            | 3359,4        |
| Control    | 298       | 8045,5         | 7             | 1149,4            | 4855,4        |
| Control    | 308       | 9498           | 7             | 1356,9            | 4570,4        |
| CIMT       | 211       | 12640,4        | 10            | 1264,0            | 6745,7        |
| CIMT       | 212       | 18583,7        | 10            | 1858,4            | 9849,3        |
| CIMT       | 299       | 7330,5         | 7             | 1047,2            | 4355,9        |
| CIMT       | 300       | 8347,1         | 7             | 1192,4            | 4171,5        |
| CIMT       | 309       | 7789,5         | 7             | 1112,8            | 5979,6        |
| CIMT       | 218       | 9881,1         | 8             | 1235,1            | 4593,4        |
| CIMT+G-CSF | 213       | 10566,7        | 11            | 960,6             | 5339,2        |
| CIMT+G-CSF | 214       | 10724,6        | 7             | 1532,1            | 4090,8        |
| CIMT+G-CSF | 217       | 18217,8        | 10            | 1821,8            | 4234,4        |
| CIMT+G-CSF | 304       | 4980           | 7             | 711,4             | 2774,6        |
| CIMT+G-CSF | 305       | 5124           | 8             | 640,5             | 3824,6        |
| CIMT/G-CSF | 306       | 6907           | 7             | 986,7             | 4657,8        |
| CIMT/G-CSF | 311       | 10084,9        | 7             | 1440,7            | 5792,8        |
| CIMT/G-CSF | 313       | 4842,1         | 7             | 691,7             | 3058,9        |
| CIMT/G-CSF | 314       | 5871,9         | 6             | 978,7             | 4727,9        |
| CIMT/G-CSF | 315       | 9425,7         | 7             | 1346,5            | 4032,4        |
| G-CSF      | 220       | 7862,9         | 7             | 1123,3            | 4967,2        |
| G-CSF      | 221       | 10657,8        | 10            | 1065,8            | 6827,1        |
| G-CSF      | 222       | 14316,3        | 9             | 1590,7            | 8178,1        |
| G-CSF      | 301       | 5836,4         | 7             | 833,8             | 4840,8        |
| G-CSF      | 302       | 8029,9         | 10            | 803,0             | 5822          |
| G-CSF      | 303       | 9156,7         | 7             | 1308,1            | 5242,9        |

### Data Figure 5

Intersections corresponding contralateral cortex

| Group      | animal no | Qty basilar   | no of neurons | Qty per neuron       |            | Qty per neuron |  |
|------------|-----------|---------------|---------------|----------------------|------------|----------------|--|
|            |           |               |               | basilar              | Qty apical | apical         |  |
| Control    | 215       | 746           | 10            | 74,6                 | 273        | 27,3           |  |
| Control    | 216       | 473           | 10            | 47,3                 | 285        | 28,5           |  |
| Control    | 219       | 789           | 8             | 98,6                 | 310        | 38,8           |  |
| Control    | 297       | 534           | 7             | 76,3                 | 237        | 33,9           |  |
| Control    | 298       | 623           | 7             | 89,0                 | 445        | 63,6           |  |
| Control    | 308       | 643           | 7             | 91,9                 | 347        | 49,6           |  |
| CIMT       | 211       | 912           | 10            | 91,2                 | 471        | 47,1           |  |
| CIMT       | 212       | 1332          | 10            | 133,2                | 699        | 69,9           |  |
| CIMT       | 299       | 692           | 7             | 98,9                 | 311        | 44,4           |  |
| CIMT       | 300       | 411           | 7             | 58,7                 | 305        | 43,6           |  |
| CIMT       | 309       | 636           | 8             | 79,5                 | 293        | 36,6           |  |
| CIMT       | 218       | 583           | 8             | 72,9                 | 371        | 46,4           |  |
| CIMT+G-CSF | 213       | 792           | 11            | 72,0                 | 380        | 34,5           |  |
| CIMT+G-CSF | 214       | 818           | 7             | 116,9                | 279        | 39,9           |  |
| CIMT+G-CSF | 217       | 1163          | 10            | 116,3                | 306        | 30,6           |  |
| CIMT+G-CSF | 304       | 370           | 7             | 52,9                 | 147        | 21,0           |  |
| CIMT+G-CSF | 305       | 341           | 8             | 42,6                 | 283        | 35,4           |  |
| CIMT/G-CSF | 306       | 501           | 7             | 71,6                 | 337        | 48,1           |  |
| CIMT/G-CSF | 311       | 806           | 7             | 115,1                | 372        | 53,1           |  |
| CIMT/G-CSF | 313       | 356           | 7             | 50,9                 | 214        | 30,6           |  |
| CIMT/G-CSF | 314       | 425           | 6             | 70,8                 | 299        | 49,8           |  |
| CIMT/G-CSF | 315       | 675           | 7             | 96,4                 | 217        | 31,0           |  |
| G-CSF      | 220       | 552           | 7             | 78,9                 | 332        | 47,4           |  |
| G-CSF      | 221       | 838           | 10            | 83,8                 | 473        | 47,3           |  |
| G-CSF      | 222       | 1054          | 9             | 117,1                | 568        | 63,1           |  |
| G-CSF      | 301       | 427           | 7             | 61,0                 | 332        | 47,4           |  |
| G-CSF      | 302       | 594           | 10            | 59,4                 | 340        | 34,0           |  |
| G-CSF      | 303       | 683           | 7             | 97,6                 | 378        | 54,0           |  |
| Group      | animal no | number of net | Qty total     | Qty per neuron total |            |                |  |
| Control    | 215       | 10            | 1019          | 101,9                |            |                |  |
| Control    | 216       | 10            | 758           | 75,8                 |            |                |  |
| Control    | 219       | 8             | 1099          | 137,4                |            |                |  |
| Control    | 297       | 7             | 771           | 110,1                |            |                |  |
| Control    | 298       | 7             | 1068          | 152,6                |            |                |  |
| Control    | 308       | 7             | 990           | 141,4                |            |                |  |
| CIMT       | 211       | 10            | 1383          | 138,3                |            |                |  |
| CIMT       | 212       | 10            | 2031          | 203,1                |            |                |  |
| CIMT       | 299       | 7             | 1003          | 143,3                |            |                |  |
| CIMT       | 300       | 7             | 716           | 102,3                |            |                |  |
| CIMT       | 309       | 8             | 929           | 116,1                |            |                |  |
| CIMT       | 218       | 8             | 954           | 119,3                |            |                |  |
| CIMT+G-CSF | 213       | 11            | 1172          | 106,5                |            |                |  |
| CIMT+G-CSF | 214       | 7             | 1097          | 156,7                |            |                |  |
| CIMT+G-CSF | 217       | 10            | 1469          | 146,9                |            |                |  |
| CIMT+G-CSF | 304       | 7             | 517           | 73,9                 |            |                |  |
| CIMT+G-CSF | 305       | 8             | 624           | 78,0                 |            |                |  |
| CIMT/G-CSF | 306       | 7             | 838           | 119,7                |            |                |  |
| CIMT/G-CSF | 311       | 7             | 1178          | 168,3                |            |                |  |
| CIMT/G-CSF | 313       | 7             | 570           | 81,4                 |            |                |  |
| CIMT/G-CSF | 314       | 6             | 724           | 120,7                |            |                |  |

|            |     |    |      |       |
|------------|-----|----|------|-------|
| CIMT/G-CSF | 315 | 7  | 892  | 127,4 |
| G-CSF      | 220 | 7  | 884  | 126,3 |
| G-CSF      | 221 | 10 | 1311 | 131,1 |
| G-CSF      | 222 | 9  | 1622 | 180,2 |
| G-CSF      | 301 | 7  | 759  | 108,4 |
| G-CSF      | 302 | 10 | 934  | 93,4  |
| G-CSF      | 303 | 7  | 1061 | 151,6 |

**Data Figure 6**

**sholl analysis**  
**apical dendrite Sholl 10µm**

| Group   | number    | Radius(µm) | Intersections | Length(µm) |
|---------|-----------|------------|---------------|------------|
| Control | V215-10_1 | 10         | 2             | 7,9        |
| Control | V215-10_2 | 10         | 0             | 0          |
| Control | V215-11_1 | 10         | 0             | 0          |
| Control | V215-12_1 | 10         | 0             | 0          |
| Control | V215-12_2 | 10         | 1             | 3          |
| Control | V215-13_1 | 10         | 0             | 0          |
| Control | V215-15_1 | 10         | 0             | 0          |
| Control | V215-15_2 | 10         | 0             | 0          |
| Control | V215-16_1 | 10         | 0             | 0          |
| Control | V215-18_1 | 10         | 0             | 0          |
| Control | V216-11_1 | 10         | 0             | 0          |
| Control | V216-12_1 | 10         | 1             | 1          |
| Control | V216-13_1 | 10         | 1             | 1,9        |
| Control | V216-14_1 | 10         | 0             | 0          |
| Control | V216-14_2 | 10         | 0             | 0          |
| Control | V216-16_1 | 10         | 1             | 0,5        |
| Control | V216-16_2 | 10         | 0             | 0          |
| Control | V216-17_1 | 10         | 1             | 0,1        |
| Control | V216-18_1 | 10         | 1             | 1,9        |
| Control | V216-18_2 | 10         | 0             | 0          |
| Control | V219-6_1  | 10         | 0             | 0          |
| Control | V219-11_1 | 10         | 0             | 0          |
| Control | V219-12_1 | 10         | 0             | 0          |
| Control | V219-13_1 | 10         | 2             | 2,1        |
| Control | V219-13_2 | 10         | 0             | 0          |
| Control | V219-14_1 | 10         | 0             | 0          |
| Control | V219-14_2 | 10         | 1             | 1,4        |
| Control | V219-16_1 | 10         | 0             | 0          |
| Control | V297-19_1 | 10         | 0             | 0          |
| Control | V297-19_2 | 10         | 0             | 0          |
| Control | V297-20_1 | 10         | 0             | 0          |
| Control | V297-20_2 | 10         | 0             | 0          |
| Control | V297-20_3 | 10         | 0             | 0          |
| Control | V297-22_1 | 10         | 0             | 0          |
| Control | V297-22_2 | 10         | 0             | 0          |
| Control | V298-15_1 | 10         | 0             | 0          |
| Control | V298-16_1 | 10         | 1             | 0,1        |
| Control | V298-16_2 | 10         | 0             | 0          |
| Control | V298-16_3 | 10         | 0             | 0          |
| Control | V298-17_1 | 10         | 1             | 1          |
| Control | V298-17_2 | 10         | 1             | 0,7        |

|         |           |    |   |     |
|---------|-----------|----|---|-----|
| Control | V298-17_3 | 10 | 0 | 0   |
| Control | V308-17_1 | 10 | 0 | 0   |
| Control | V308-17_2 | 10 | 0 | 0   |
| Control | V308-17_3 | 10 | 0 | 0   |
| Control | V308-17_4 | 10 | 0 | 0   |
| Control | V308-18_1 | 10 | 1 | 9,5 |
| Control | V308-18_2 | 10 | 0 | 0   |
| Control | V308-18_3 | 10 | 0 | 0   |
| CIMT    | V211-10_1 | 10 | 0 | 0   |
| CIMT    | V211-10_2 | 10 | 0 | 0   |
| CIMT    | V211-11_1 | 10 | 0 | 0   |
| CIMT    | V211-11_2 | 10 | 0 | 0   |
| CIMT    | V211-12_1 | 10 | 0 | 0   |
| CIMT    | V211-13_1 | 10 | 0 | 0   |
| CIMT    | V211-13_2 | 10 | 0 | 0   |
| CIMT    | V211-15_1 | 10 | 0 | 0   |
| CIMT    | V211-15_2 | 10 | 1 | 0,9 |
| CIMT    | V211-16_1 | 10 | 1 | 0,2 |
| CIMT    | V212-14_1 | 10 | 0 | 0   |
| CIMT    | V212-14_2 | 10 | 0 | 0   |
| CIMT    | V212-15_1 | 10 | 0 | 0   |
| CIMT    | V212-18_1 | 10 | 0 | 0   |
| CIMT    | V212-21_1 | 10 | 0 | 0   |
| CIMT    | V212-21_2 | 10 | 0 | 0   |
| CIMT    | V212-22_1 | 10 | 0 | 0   |
| CIMT    | V212-23_1 | 10 | 0 | 0   |
| CIMT    | V212-23_2 | 10 | 1 | 0,4 |
| CIMT    | V212-24_1 | 10 | 0 | 0   |
| CIMT    | V218-9_1  | 10 | 0 | 0   |
| CIMT    | V218-10_1 | 10 | 0 | 0   |
| CIMT    | V218-11_1 | 10 | 0 | 0   |
| CIMT    | V218-12_1 | 10 | 1 | 1,4 |
| CIMT    | V218-12_2 | 10 | 0 | 0   |
| CIMT    | V218-13_1 | 10 | 0 | 0   |
| CIMT    | V218-15_1 | 10 | 0 | 0   |
| CIMT    | V218-17_1 | 10 | 0 | 0   |
| CIMT    | V299-14_1 | 10 | 1 | 2,9 |
| CIMT    | V299-15_1 | 10 | 1 | 0,1 |
| CIMT    | V299-15_2 | 10 | 0 | 0   |
| CIMT    | V299-16_1 | 10 | 0 | 0   |
| CIMT    | V299-16_2 | 10 | 0 | 0   |
| CIMT    | V299-17_1 | 10 | 0 | 0   |
| CIMT    | V299-17_2 | 10 | 0 | 0   |
| CIMT    | V300-16_1 | 10 | 0 | 0   |
| CIMT    | V300-18_1 | 10 | 0 | 0   |
| CIMT    | V300-18_2 | 10 | 1 | 0,9 |
| CIMT    | V300-20_1 | 10 | 0 | 0   |
| CIMT    | V300-22_1 | 10 | 0 | 0   |
| CIMT    | V300-23_1 | 10 | 0 | 0   |
| CIMT    | V300-23_2 | 10 | 1 | 0,1 |
| CIMT    | V309-15_1 | 10 | 0 | 0   |
| CIMT    | V309-15_2 | 10 | 0 | 0   |
| CIMT    | V309-16_1 | 10 | 0 | 0   |
| CIMT    | V309-16_2 | 10 | 0 | 0   |
| CIMT    | V309-16_3 | 10 | 1 | 0,6 |
| CIMT    | V309-17_1 | 10 | 0 | 0   |



|            |           |    |   |      |
|------------|-----------|----|---|------|
| CIMT       | V309-17_2 | 10 | 1 | 1,1  |
| CIMT+G-CSF | V213-13_1 | 10 | 0 | 0    |
| CIMT+G-CSF | V213-16_1 | 10 | 1 | 1,6  |
| CIMT+G-CSF | V213-17_1 | 10 | 0 | 0    |
| CIMT+G-CSF | V213-17_2 | 10 | 0 | 0    |
| CIMT+G-CSF | V213-18_1 | 10 | 1 | 0,6  |
| CIMT+G-CSF | V213-18_2 | 10 | 1 | 1,4  |
| CIMT+G-CSF | V213-19_1 | 10 | 0 | 0    |
| CIMT+G-CSF | V213-19_2 | 10 | 0 | 0    |
| CIMT+G-CSF | V213-20_1 | 10 | 1 | 1    |
| CIMT+G-CSF | V213-22_1 | 10 | 0 | 0    |
| CIMT+G-CSF | V213-23_1 | 10 | 1 | 1,6  |
| CIMT+G-CSF | V214-14_1 | 10 | 0 | 0    |
| CIMT+G-CSF | V214-17_1 | 10 | 0 | 0    |
| CIMT+G-CSF | V214-18_1 | 10 | 0 | 0    |
| CIMT+G-CSF | V214-19_1 | 10 | 0 | 0    |
| CIMT+G-CSF | V214-19_2 | 10 | 1 | 1,1  |
| CIMT+G-CSF | V214-20_1 | 10 | 0 | 0    |
| CIMT+G-CSF | V214-21_1 | 10 | 0 | 0    |
| CIMT+G-CSF | V217-1_1  | 10 | 0 | 0    |
| CIMT+G-CSF | V217-2_1  | 10 | 0 | 0    |
| CIMT+G-CSF | V217-4_1  | 10 | 0 | 0    |
| CIMT+G-CSF | V217-6_1  | 10 | 0 | 0    |
| CIMT+G-CSF | V217-6_3  | 10 | 0 | 0    |
| CIMT+G-CSF | V217-8_1  | 10 | 0 | 0    |
| CIMT+G-CSF | V217-8_4  | 10 | 0 | 0    |
| CIMT+G-CSF | V217-10_1 | 10 | 0 | 0    |
| CIMT+G-CSF | V217-11_1 | 10 | 0 | 0    |
| CIMT+G-CSF | V304-16_1 | 10 | 1 | 15,8 |
| CIMT+G-CSF | V304-17_1 | 10 | 1 | 4,2  |
| CIMT+G-CSF | V304-17_2 | 10 | 1 | 4,5  |
| CIMT+G-CSF | V304-17_3 | 10 | 1 | 0,3  |
| CIMT+G-CSF | V304-17_4 | 10 | 0 | 0    |
| CIMT+G-CSF | V304-19_1 | 10 | 1 | 2,5  |
| CIMT+G-CSF | V304-19_2 | 10 | 1 | 1,9  |
| CIMT+G-CSF | V305-17_1 | 10 | 0 | 0    |
| CIMT+G-CSF | V305-17_2 | 10 | 1 | 4,5  |
| CIMT+G-CSF | V305-17_3 | 10 | 1 | 0,3  |
| CIMT+G-CSF | V305-18_1 | 10 | 1 | 0,4  |
| CIMT+G-CSF | V305-18_2 | 10 | 1 | 2,1  |
| CIMT+G-CSF | V305-18_3 | 10 | 0 | 0    |
| CIMT+G-CSF | V305-18_4 | 10 | 0 | 0    |
| CIMT+G-CSF | V305-19_1 | 10 | 1 | 0,3  |
| CIMT/G-CSF | V306-16_1 | 10 | 1 | 1,3  |
| CIMT/G-CSF | V306-16_2 | 10 | 0 | 0    |
| CIMT/G-CSF | V306-17_1 | 10 | 0 | 0    |
| CIMT/G-CSF | V306-17_2 | 10 | 1 | 0,6  |
| CIMT/G-CSF | V306-17_3 | 10 | 0 | 0    |
| CIMT/G-CSF | V306-17_4 | 10 | 1 | 0,8  |
| CIMT/G-CSF | V306-17_5 | 10 | 1 | 1,6  |
| CIMT/G-CSF | V311-16_1 | 10 | 0 | 0    |
| CIMT/G-CSF | V311-17_1 | 10 | 0 | 0    |
| CIMT/G-CSF | V311-17_2 | 10 | 0 | 0    |
| CIMT/G-CSF | V311-19_1 | 10 | 1 | 0,8  |
| CIMT/G-CSF | V311-20_1 | 10 | 0 | 0    |
| CIMT/G-CSF | V311-20_2 | 10 | 0 | 0    |

|            |           |    |   |     |
|------------|-----------|----|---|-----|
| CIMT/G-CSF | V311-20_3 | 10 | 0 | 0   |
| CIMT/G-CSF | V313-14_1 | 10 | 0 | 0   |
| CIMT/G-CSF | V313-15_1 | 10 | 0 | 0   |
| CIMT/G-CSF | V313-15_2 | 10 | 1 | 0,9 |
| CIMT/G-CSF | V313-17_1 | 10 | 0 | 0   |
| CIMT/G-CSF | V313-17_2 | 10 | 1 | 1   |
| CIMT/G-CSF | V313-17_3 | 10 | 0 | 0   |
| CIMT/G-CSF | V313-19_1 | 10 | 0 | 0   |
| CIMT/G-CSF | V314-16_1 | 10 | 2 | 4   |
| CIMT/G-CSF | V314-16_2 | 10 | 0 | 0   |
| CIMT/G-CSF | V314-17_1 | 10 | 0 | 0   |
| CIMT/G-CSF | V314-17_2 | 10 | 1 | 0,1 |
| CIMT/G-CSF | V314-17_3 | 10 | 1 | 2,3 |
| CIMT/G-CSF | V314-18_1 | 10 | 1 | 0,3 |
| CIMT/G-CSF | V314-18_2 | 10 | 0 | 0   |
| CIMT/G-CSF | V315-11_1 | 10 | 1 | 0,8 |
| CIMT/G-CSF | V315-11_2 | 10 | 0 | 0   |
| CIMT/G-CSF | V315-13_1 | 10 | 0 | 0   |
| CIMT/G-CSF | V315-13_2 | 10 | 0 | 0   |
| CIMT/G-CSF | V315-14_1 | 10 | 0 | 0   |
| CIMT/G-CSF | V315-14_2 | 10 | 0 | 0   |
| CIMT/G-CSF | V315-14_3 | 10 | 0 | 0   |
| G-CSF      | V220-9_1  | 10 | 0 | 0   |
| G-CSF      | V220-11_1 | 10 | 1 | 4,2 |
| G-CSF      | V220-12_1 | 10 | 0 | 0   |
| G-CSF      | V220-16_1 | 10 | 1 | 2,7 |
| G-CSF      | V220-16_2 | 10 | 1 | 3,6 |
| G-CSF      | V220-17_1 | 10 | 0 | 0   |
| G-CSF      | V220-18_1 | 10 | 1 | 1,6 |
| G-CSF      | V221-2_1  | 10 | 0 | 0   |
| G-CSF      | V221-4_1  | 10 | 0 | 0   |
| G-CSF      | V221-5_1  | 10 | 0 | 0   |
| G-CSF      | V221-6_1  | 10 | 1 | 0,2 |
| G-CSF      | V221-7_1  | 10 | 1 | 1,1 |
| G-CSF      | V221-7_2  | 10 | 0 | 0   |
| G-CSF      | V221-11_1 | 10 | 0 | 0   |
| G-CSF      | V221-13_1 | 10 | 0 | 0   |
| G-CSF      | V221-15_1 | 10 | 0 | 0   |
| G-CSF      | V221-20_1 | 10 | 0 | 0   |
| G-CSF      | V222-19_1 | 10 | 0 | 0   |
| G-CSF      | V222-19_2 | 10 | 0 | 0   |
| G-CSF      | V222-20_1 | 10 | 0 | 0   |
| G-CSF      | V222-20_2 | 10 | 0 | 0   |
| G-CSF      | V222-21_1 | 10 | 0 | 0   |
| G-CSF      | V222-22_1 | 10 | 0 | 0   |
| G-CSF      | V222-22_2 | 10 | 0 | 0   |
| G-CSF      | V222-23_1 | 10 | 0 | 0   |
| G-CSF      | V222-24_1 | 10 | 0 | 0   |
| G-CSF      | V301-18_1 | 10 | 1 | 0,6 |
| G-CSF      | V301-18_2 | 10 | 1 | 3,6 |
| G-CSF      | V301-18_3 | 10 | 0 | 0   |
| G-CSF      | V301-19_1 | 10 | 1 | 1   |
| G-CSF      | V301-19_2 | 10 | 1 | 1,7 |
| G-CSF      | V301-20_1 | 10 | 0 | 0   |
| G-CSF      | V301-20_2 | 10 | 1 | 2,2 |
| G-CSF      | V302-15_1 | 10 | 0 | 0   |

|       |           |    |   |     |
|-------|-----------|----|---|-----|
| G-CSF | V302-15_2 | 10 | 1 | 0,5 |
| G-CSF | V302-15_3 | 10 | 1 | 0,2 |
| G-CSF | V302-16_1 | 10 | 1 | 1,2 |
| G-CSF | V302-16_2 | 10 | 0 | 0   |
| G-CSF | V302-16_3 | 10 | 0 | 0   |
| G-CSF | V302-16_4 | 10 | 0 | 0   |
| G-CSF | V302-17_1 | 10 | 0 | 0   |
| G-CSF | V302-17_2 | 10 | 0 | 0   |
| G-CSF | V302-17_3 | 10 | 0 | 0   |
| G-CSF | V303-15_1 | 10 | 1 | 0,9 |
| G-CSF | V303-15_2 | 10 | 1 | 0,8 |
| G-CSF | V303-15_3 | 10 | 0 | 0   |
| G-CSF | V303-16_1 | 10 | 0 | 0   |
| G-CSF | V303-16_2 | 10 | 0 | 0   |
| G-CSF | V303-16_3 | 10 | 1 | 2,3 |
| G-CSF | V303-17_1 | 10 | 0 | 0   |

**apical dendrite Sholl 20 $\mu$ m**

| <b>Group</b> | <b>number</b> | <b>Radius(<math>\mu</math>m)</b> | <b>Intersections</b> | <b>Length(<math>\mu</math>m)</b> |
|--------------|---------------|----------------------------------|----------------------|----------------------------------|
| Control      | V215-10_1     | 20                               | 2                    | 25,9                             |
| Control      | V215-10_2     | 20                               | 1                    | 4,9                              |
| Control      | V215-11_1     | 20                               | 1                    | 10,1                             |
| Control      | V215-12_1     | 20                               | 2                    | 19,2                             |
| Control      | V215-12_2     | 20                               | 1                    | 13,3                             |
| Control      | V215-13_1     | 20                               | 2                    | 20                               |
| Control      | V215-15_1     | 20                               | 1                    | 9,2                              |
| Control      | V215-15_2     | 20                               | 1                    | 10,8                             |
| Control      | V215-16_1     | 20                               | 5                    | 54,7                             |
| Control      | V215-18_1     | 20                               | 1                    | 10,4                             |
| Control      | V216-11_1     | 20                               | 1                    | 9,2                              |
| Control      | V216-12_1     | 20                               | 1                    | 14,7                             |
| Control      | V216-13_1     | 20                               | 1                    | 11,3                             |
| Control      | V216-14_1     | 20                               | 1                    | 13,8                             |
| Control      | V216-14_2     | 20                               | 1                    | 3,6                              |
| Control      | V216-16_1     | 20                               | 1                    | 10,2                             |
| Control      | V216-16_2     | 20                               | 1                    | 9,2                              |
| Control      | V216-17_1     | 20                               | 1                    | 10,4                             |
| Control      | V216-18_1     | 20                               | 1                    | 14,9                             |
| Control      | V216-18_2     | 20                               | 1                    | 9,8                              |
| Control      | V219-6_1      | 20                               | 1                    | 5,5                              |
| Control      | V219-11_1     | 20                               | 0                    | 0                                |
| Control      | V219-12_1     | 20                               | 1                    | 5,9                              |
| Control      | V219-13_1     | 20                               | 3                    | 30,6                             |
| Control      | V219-13_2     | 20                               | 1                    | 9,6                              |
| Control      | V219-14_1     | 20                               | 1                    | 7,2                              |
| Control      | V219-14_2     | 20                               | 1                    | 11,7                             |
| Control      | V219-16_1     | 20                               | 2                    | 31,4                             |
| Control      | V297-19_1     | 20                               | 1                    | 6,8                              |
| Control      | V297-19_2     | 20                               | 1                    | 7,6                              |
| Control      | V297-20_1     | 20                               | 2                    | 7                                |
| Control      | V297-20_2     | 20                               | 1                    | 7,8                              |
| Control      | V297-20_3     | 20                               | 1                    | 6,1                              |
| Control      | V297-22_1     | 20                               | 1                    | 7,5                              |
| Control      | V297-22_2     | 20                               | 1                    | 9,9                              |

|         |           |    |   |      |
|---------|-----------|----|---|------|
| Control | V298-15_1 | 20 | 4 | 15,6 |
| Control | V298-16_1 | 20 | 1 | 13,6 |
| Control | V298-16_2 | 20 | 2 | 15   |
| Control | V298-16_3 | 20 | 2 | 27,8 |
| Control | V298-17_1 | 20 | 1 | 15,2 |
| Control | V298-17_2 | 20 | 2 | 11,5 |
| Control | V298-17_3 | 20 | 1 | 15,1 |
| Control | V308-17_1 | 20 | 3 | 29,4 |
| Control | V308-17_2 | 20 | 1 | 11,1 |
| Control | V308-17_3 | 20 | 1 | 10,9 |
| Control | V308-17_4 | 20 | 1 | 11   |
| Control | V308-18_1 | 20 | 1 | 11,1 |
| Control | V308-18_2 | 20 | 2 | 45,2 |
| Control | V308-18_3 | 20 | 1 | 9,9  |
| CIMT    | V211-10_1 | 20 | 2 | 10,8 |
| CIMT    | V211-10_2 | 20 | 1 | 7,1  |
| CIMT    | V211-11_1 | 20 | 1 | 10,8 |
| CIMT    | V211-11_2 | 20 | 3 | 28,2 |
| CIMT    | V211-12_1 | 20 | 1 | 5    |
| CIMT    | V211-13_1 | 20 | 1 | 6,6  |
| CIMT    | V211-13_2 | 20 | 1 | 8,3  |
| CIMT    | V211-15_1 | 20 | 2 | 32,5 |
| CIMT    | V211-15_2 | 20 | 2 | 16,4 |
| CIMT    | V211-16_1 | 20 | 1 | 10,5 |
| CIMT    | V212-14_1 | 20 | 1 | 7,7  |
| CIMT    | V212-14_2 | 20 | 1 | 7,5  |
| CIMT    | V212-15_1 | 20 | 3 | 13,6 |
| CIMT    | V212-18_1 | 20 | 1 | 11,1 |
| CIMT    | V212-21_1 | 20 | 1 | 9,7  |
| CIMT    | V212-21_2 | 20 | 1 | 1,6  |
| CIMT    | V212-22_1 | 20 | 1 | 7,4  |
| CIMT    | V212-23_1 | 20 | 1 | 10,9 |
| CIMT    | V212-23_2 | 20 | 1 | 10,3 |
| CIMT    | V212-24_1 | 20 | 1 | 13,1 |
| CIMT    | V218-9_1  | 20 | 1 | 6,7  |
| CIMT    | V218-10_1 | 20 | 1 | 8,6  |
| CIMT    | V218-11_1 | 20 | 1 | 3,1  |
| CIMT    | V218-12_1 | 20 | 2 | 15,5 |
| CIMT    | V218-12_2 | 20 | 1 | 9,8  |
| CIMT    | V218-13_1 | 20 | 1 | 10,1 |
| CIMT    | V218-15_1 | 20 | 2 | 25,8 |
| CIMT    | V218-17_1 | 20 | 1 | 10,5 |
| CIMT    | V299-14_1 | 20 | 1 | 11,2 |
| CIMT    | V299-15_1 | 20 | 1 | 11   |
| CIMT    | V299-15_2 | 20 | 1 | 14,1 |
| CIMT    | V299-16_1 | 20 | 1 | 8,6  |
| CIMT    | V299-16_2 | 20 | 1 | 5,1  |
| CIMT    | V299-17_1 | 20 | 1 | 6    |
| CIMT    | V299-17_2 | 20 | 1 | 11,1 |
| CIMT    | V300-16_1 | 20 | 1 | 9,5  |
| CIMT    | V300-18_1 | 20 | 1 | 12,2 |
| CIMT    | V300-18_2 | 20 | 1 | 10,4 |
| CIMT    | V300-20_1 | 20 | 1 | 10,6 |
| CIMT    | V300-22_1 | 20 | 1 | 10,2 |
| CIMT    | V300-23_1 | 20 | 2 | 40,4 |
| CIMT    | V300-23_2 | 20 | 1 | 10,8 |

|            |           |    |   |      |
|------------|-----------|----|---|------|
| CIMT       | V309-15_1 | 20 | 3 | 29,3 |
| CIMT       | V309-15_2 | 20 | 1 | 4,3  |
| CIMT       | V309-16_1 | 20 | 1 | 10,6 |
| CIMT       | V309-16_2 | 20 | 1 | 11,5 |
| CIMT       | V309-16_3 | 20 | 1 | 10,1 |
| CIMT       | V309-17_1 | 20 | 2 | 30,3 |
| CIMT       | V309-17_2 | 20 | 1 | 11,1 |
| CIMT+G-CSF | V213-13_1 | 20 | 1 | 12,2 |
| CIMT+G-CSF | V213-16_1 | 20 | 2 | 16,3 |
| CIMT+G-CSF | V213-17_1 | 20 | 1 | 10,1 |
| CIMT+G-CSF | V213-17_2 | 20 | 2 | 41,7 |
| CIMT+G-CSF | V213-18_1 | 20 | 1 | 12,4 |
| CIMT+G-CSF | V213-18_2 | 20 | 2 | 45,6 |
| CIMT+G-CSF | V213-19_1 | 20 | 1 | 11,7 |
| CIMT+G-CSF | V213-19_2 | 20 | 1 | 10,5 |
| CIMT+G-CSF | V213-20_1 | 20 | 1 | 10,1 |
| CIMT+G-CSF | V213-22_1 | 20 | 1 | 11,1 |
| CIMT+G-CSF | V213-23_1 | 20 | 1 | 10,1 |
| CIMT+G-CSF | V214-14_1 | 20 | 0 | 0    |
| CIMT+G-CSF | V214-17_1 | 20 | 0 | 0    |
| CIMT+G-CSF | V214-18_1 | 20 | 1 | 8,1  |
| CIMT+G-CSF | V214-19_1 | 20 | 1 | 10   |
| CIMT+G-CSF | V214-19_2 | 20 | 1 | 10,2 |
| CIMT+G-CSF | V214-20_1 | 20 | 1 | 8,6  |
| CIMT+G-CSF | V214-21_1 | 20 | 1 | 8,4  |
| CIMT+G-CSF | V217-1_1  | 20 | 1 | 2,5  |
| CIMT+G-CSF | V217-2_1  | 20 | 1 | 7,8  |
| CIMT+G-CSF | V217-4_1  | 20 | 1 | 4,1  |
| CIMT+G-CSF | V217-6_1  | 20 | 1 | 10,5 |
| CIMT+G-CSF | V217-6_3  | 20 | 1 | 11,5 |
| CIMT+G-CSF | V217-8_1  | 20 | 1 | 15   |
| CIMT+G-CSF | V217-8_4  | 20 | 1 | 3,3  |
| CIMT+G-CSF | V217-10_1 | 20 | 1 | 8,3  |
| CIMT+G-CSF | V217-11_1 | 20 | 2 | 27,2 |
| CIMT+G-CSF | V304-16_1 | 20 | 1 | 13,8 |
| CIMT+G-CSF | V304-17_1 | 20 | 2 | 35,4 |
| CIMT+G-CSF | V304-17_2 | 20 | 1 | 10,6 |
| CIMT+G-CSF | V304-17_3 | 20 | 1 | 17,1 |
| CIMT+G-CSF | V304-17_4 | 20 | 1 | 13,6 |
| CIMT+G-CSF | V304-19_1 | 20 | 1 | 11,4 |
| CIMT+G-CSF | V304-19_2 | 20 | 1 | 16,3 |
| CIMT+G-CSF | V305-17_1 | 20 | 1 | 9,5  |
| CIMT+G-CSF | V305-17_2 | 20 | 2 | 30,3 |
| CIMT+G-CSF | V305-17_3 | 20 | 1 | 12,1 |
| CIMT+G-CSF | V305-18_1 | 20 | 1 | 11,7 |
| CIMT+G-CSF | V305-18_2 | 20 | 1 | 12,4 |
| CIMT+G-CSF | V305-18_3 | 20 | 1 | 11,1 |
| CIMT+G-CSF | V305-18_4 | 20 | 2 | 12   |
| CIMT+G-CSF | V305-19_1 | 20 | 1 | 12,6 |
| CIMT/G-CSF | V306-16_1 | 20 | 1 | 10,3 |
| CIMT/G-CSF | V306-16_2 | 20 | 2 | 19,4 |
| CIMT/G-CSF | V306-17_1 | 20 | 1 | 12   |
| CIMT/G-CSF | V306-17_2 | 20 | 1 | 10,3 |
| CIMT/G-CSF | V306-17_3 | 20 | 1 | 8,7  |
| CIMT/G-CSF | V306-17_4 | 20 | 1 | 12,9 |
| CIMT/G-CSF | V306-17_5 | 20 | 1 | 10,4 |

|            |           |    |   |      |
|------------|-----------|----|---|------|
| CIMT/G-CSF | V311-16_1 | 20 | 1 | 7    |
| CIMT/G-CSF | V311-17_1 | 20 | 1 | 7    |
| CIMT/G-CSF | V311-17_2 | 20 | 1 | 10,8 |
| CIMT/G-CSF | V311-19_1 | 20 | 1 | 11,8 |
| CIMT/G-CSF | V311-20_1 | 20 | 1 | 6,9  |
| CIMT/G-CSF | V311-20_2 | 20 | 1 | 7,7  |
| CIMT/G-CSF | V311-20_3 | 20 | 2 | 10,1 |
| CIMT/G-CSF | V313-14_1 | 20 | 3 | 29,6 |
| CIMT/G-CSF | V313-15_1 | 20 | 1 | 9,8  |
| CIMT/G-CSF | V313-15_2 | 20 | 1 | 11,3 |
| CIMT/G-CSF | V313-17_1 | 20 | 2 | 13   |
| CIMT/G-CSF | V313-17_2 | 20 | 3 | 25,9 |
| CIMT/G-CSF | V313-17_3 | 20 | 1 | 12,7 |
| CIMT/G-CSF | V313-19_1 | 20 | 1 | 10,6 |
| CIMT/G-CSF | V314-16_1 | 20 | 4 | 51,9 |
| CIMT/G-CSF | V314-16_2 | 20 | 1 | 6,8  |
| CIMT/G-CSF | V314-17_1 | 20 | 1 | 8,9  |
| CIMT/G-CSF | V314-17_2 | 20 | 1 | 10,1 |
| CIMT/G-CSF | V314-17_3 | 20 | 1 | 35,5 |
| CIMT/G-CSF | V314-18_1 | 20 | 1 | 15,2 |
| CIMT/G-CSF | V314-18_2 | 20 | 1 | 9,3  |
| CIMT/G-CSF | V315-11_1 | 20 | 3 | 30,2 |
| CIMT/G-CSF | V315-11_2 | 20 | 1 | 7,4  |
| CIMT/G-CSF | V315-13_1 | 20 | 1 | 7,3  |
| CIMT/G-CSF | V315-13_2 | 20 | 2 | 8,3  |
| CIMT/G-CSF | V315-14_1 | 20 | 1 | 9,7  |
| CIMT/G-CSF | V315-14_2 | 20 | 2 | 12,1 |
| CIMT/G-CSF | V315-14_3 | 20 | 1 | 1    |
| G-CSF      | V220-9_1  | 20 | 1 | 10,9 |
| G-CSF      | V220-11_1 | 20 | 1 | 10,2 |
| G-CSF      | V220-12_1 | 20 | 1 | 9,1  |
| G-CSF      | V220-16_1 | 20 | 1 | 10,2 |
| G-CSF      | V220-16_2 | 20 | 1 | 13,8 |
| G-CSF      | V220-17_1 | 20 | 1 | 8    |
| G-CSF      | V220-18_1 | 20 | 1 | 11,5 |
| G-CSF      | V221-2_1  | 20 | 1 | 7,6  |
| G-CSF      | V221-4_1  | 20 | 1 | 9,9  |
| G-CSF      | V221-5_1  | 20 | 1 | 8,1  |
| G-CSF      | V221-6_1  | 20 | 1 | 10,4 |
| G-CSF      | V221-7_1  | 20 | 1 | 10,2 |
| G-CSF      | V221-7_2  | 20 | 1 | 8,6  |
| G-CSF      | V221-11_1 | 20 | 1 | 6,9  |
| G-CSF      | V221-13_1 | 20 | 1 | 10,1 |
| G-CSF      | V221-15_1 | 20 | 1 | 9,2  |
| G-CSF      | V221-20_1 | 20 | 1 | 12,1 |
| G-CSF      | V222-19_1 | 20 | 1 | 10,4 |
| G-CSF      | V222-19_2 | 20 | 1 | 6,1  |
| G-CSF      | V222-20_1 | 20 | 1 | 8,3  |
| G-CSF      | V222-20_2 | 20 | 1 | 9,8  |
| G-CSF      | V222-21_1 | 20 | 1 | 8,6  |
| G-CSF      | V222-22_1 | 20 | 2 | 23,9 |
| G-CSF      | V222-22_2 | 20 | 1 | 1,8  |
| G-CSF      | V222-23_1 | 20 | 2 | 4,1  |
| G-CSF      | V222-24_1 | 20 | 1 | 5,2  |
| G-CSF      | V301-18_1 | 20 | 1 | 14,7 |
| G-CSF      | V301-18_2 | 20 | 1 | 11,4 |

|       |           |    |   |      |
|-------|-----------|----|---|------|
| G-CSF | V301-18_3 | 20 | 1 | 13,7 |
| G-CSF | V301-19_1 | 20 | 1 | 10,1 |
| G-CSF | V301-19_2 | 20 | 1 | 10,5 |
| G-CSF | V301-20_1 | 20 | 2 | 18,1 |
| G-CSF | V301-20_2 | 20 | 1 | 10,5 |
| G-CSF | V302-15_1 | 20 | 1 | 11   |
| G-CSF | V302-15_2 | 20 | 1 | 12,4 |
| G-CSF | V302-15_3 | 20 | 1 | 10,4 |
| G-CSF | V302-16_1 | 20 | 2 | 23,1 |
| G-CSF | V302-16_2 | 20 | 1 | 14,5 |
| G-CSF | V302-16_3 | 20 | 1 | 15,2 |
| G-CSF | V302-16_4 | 20 | 1 | 1    |
| G-CSF | V302-17_1 | 20 | 1 | 10,8 |
| G-CSF | V302-17_2 | 20 | 1 | 9,6  |
| G-CSF | V302-17_3 | 20 | 1 | 9,7  |
| G-CSF | V303-15_1 | 20 | 1 | 12   |
| G-CSF | V303-15_2 | 20 | 2 | 29   |
| G-CSF | V303-15_3 | 20 | 1 | 12   |
| G-CSF | V303-16_1 | 20 | 2 | 13   |
| G-CSF | V303-16_2 | 20 | 1 | 8    |
| G-CSF | V303-16_3 | 20 | 1 | 18,3 |
| G-CSF | V303-17_1 | 20 | 1 | 7,1  |

#### apical dendrite Sholl 30µm

| Group   | number    | Radius(µm) | Intersections | Length(µm) |
|---------|-----------|------------|---------------|------------|
| Control | V215-10_1 | 30         | 2             | 25,5       |
| Control | V215-10_2 | 30         | 1             | 10,4       |
| Control | V215-11_1 | 30         | 1             | 11         |
| Control | V215-12_1 | 30         | 2             | 34         |
| Control | V215-12_2 | 30         | 2             | 17,5       |
| Control | V215-13_1 | 30         | 2             | 24,8       |
| Control | V215-15_1 | 30         | 5             | 24,2       |
| Control | V215-15_2 | 30         | 2             | 21         |
| Control | V215-16_1 | 30         | 5             | 77,7       |
| Control | V215-18_1 | 30         | 2             | 38         |
| Control | V216-11_1 | 30         | 2             | 22,5       |
| Control | V216-12_1 | 30         | 1             | 11,3       |
| Control | V216-13_1 | 30         | 1             | 13,2       |
| Control | V216-14_1 | 30         | 1             | 10,9       |
| Control | V216-14_2 | 30         | 1             | 12,5       |
| Control | V216-16_1 | 30         | 2             | 38,1       |
| Control | V216-16_2 | 30         | 2             | 31,8       |
| Control | V216-17_1 | 30         | 2             | 12         |
| Control | V216-18_1 | 30         | 1             | 11,4       |
| Control | V216-18_2 | 30         | 1             | 11,5       |
| Control | V219-6_1  | 30         | 1             | 11         |
| Control | V219-11_1 | 30         | 1             | 9,8        |
| Control | V219-12_1 | 30         | 1             | 10,5       |
| Control | V219-13_1 | 30         | 4             | 61,8       |
| Control | V219-13_2 | 30         | 1             | 11,7       |
| Control | V219-14_1 | 30         | 1             | 14,3       |
| Control | V219-14_2 | 30         | 1             | 10,3       |
| Control | V219-16_1 | 30         | 4             | 82         |
| Control | V297-19_1 | 30         | 1             | 14,2       |

|         |           |    |   |      |
|---------|-----------|----|---|------|
| Control | V297-19_2 | 30 | 1 | 10,3 |
| Control | V297-20_1 | 30 | 2 | 33,4 |
| Control | V297-20_2 | 30 | 1 | 10,5 |
| Control | V297-20_3 | 30 | 2 | 21,5 |
| Control | V297-22_1 | 30 | 2 | 25   |
| Control | V297-22_2 | 30 | 1 | 10,9 |
| Control | V298-15_1 | 30 | 2 | 33,9 |
| Control | V298-16_1 | 30 | 2 | 16,3 |
| Control | V298-16_2 | 30 | 3 | 23   |
| Control | V298-16_3 | 30 | 4 | 35,3 |
| Control | V298-17_1 | 30 | 2 | 15,1 |
| Control | V298-17_2 | 30 | 2 | 23,9 |
| Control | V298-17_3 | 30 | 1 | 10,6 |
| Control | V308-17_1 | 30 | 4 | 64,3 |
| Control | V308-17_2 | 30 | 1 | 10,6 |
| Control | V308-17_3 | 30 | 1 | 11   |
| Control | V308-17_4 | 30 | 2 | 38,5 |
| Control | V308-18_1 | 30 | 2 | 18   |
| Control | V308-18_2 | 30 | 2 | 27,5 |
| Control | V308-18_3 | 30 | 5 | 46   |
| CIMT    | V211-10_1 | 30 | 2 | 25,9 |
| CIMT    | V211-10_2 | 30 | 1 | 14,1 |
| CIMT    | V211-11_1 | 30 | 1 | 11,8 |
| CIMT    | V211-11_2 | 30 | 3 | 35   |
| CIMT    | V211-12_1 | 30 | 1 | 12,4 |
| CIMT    | V211-13_1 | 30 | 2 | 12,2 |
| CIMT    | V211-13_2 | 30 | 2 | 19   |
| CIMT    | V211-15_1 | 30 | 2 | 23,9 |
| CIMT    | V211-15_2 | 30 | 2 | 40,7 |
| CIMT    | V211-16_1 | 30 | 1 | 11   |
| CIMT    | V212-14_1 | 30 | 1 | 11,5 |
| CIMT    | V212-14_2 | 30 | 3 | 39,1 |
| CIMT    | V212-15_1 | 30 | 4 | 47,8 |
| CIMT    | V212-18_1 | 30 | 3 | 49,1 |
| CIMT    | V212-21_1 | 30 | 1 | 11,3 |
| CIMT    | V212-21_2 | 30 | 1 | 11,6 |
| CIMT    | V212-22_1 | 30 | 1 | 11,9 |
| CIMT    | V212-23_1 | 30 | 1 | 11,8 |
| CIMT    | V212-23_2 | 30 | 1 | 10,9 |
| CIMT    | V212-24_1 | 30 | 1 | 10,7 |
| CIMT    | V218-9_1  | 30 | 1 | 10,1 |
| CIMT    | V218-10_1 | 30 | 3 | 41   |
| CIMT    | V218-11_1 | 30 | 1 | 10,9 |
| CIMT    | V218-12_1 | 30 | 2 | 26,5 |
| CIMT    | V218-12_2 | 30 | 2 | 25,3 |
| CIMT    | V218-13_1 | 30 | 1 | 12,1 |
| CIMT    | V218-15_1 | 30 | 2 | 31,8 |
| CIMT    | V218-17_1 | 30 | 2 | 35   |
| CIMT    | V299-14_1 | 30 | 4 | 56,2 |
| CIMT    | V299-15_1 | 30 | 1 | 10,4 |
| CIMT    | V299-15_2 | 30 | 1 | 10,4 |
| CIMT    | V299-16_1 | 30 | 1 | 12,2 |
| CIMT    | V299-16_2 | 30 | 1 | 11,8 |
| CIMT    | V299-17_1 | 30 | 2 | 13,7 |
| CIMT    | V299-17_2 | 30 | 3 | 34,6 |
| CIMT    | V300-16_1 | 30 | 2 | 21,4 |



|            |           |    |   |      |
|------------|-----------|----|---|------|
| CIMT       | V300-18_1 | 30 | 1 | 10,4 |
| CIMT       | V300-18_2 | 30 | 1 | 10,3 |
| CIMT       | V300-20_1 | 30 | 1 | 10,1 |
| CIMT       | V300-22_1 | 30 | 1 | 10,8 |
| CIMT       | V300-23_1 | 30 | 3 | 26,4 |
| CIMT       | V300-23_2 | 30 | 1 | 10,6 |
| CIMT       | V309-15_1 | 30 | 4 | 66,6 |
| CIMT       | V309-15_2 | 30 | 1 | 10,5 |
| CIMT       | V309-16_1 | 30 | 1 | 12   |
| CIMT       | V309-16_2 | 30 | 2 | 84,8 |
| CIMT       | V309-16_3 | 30 | 2 | 36,6 |
| CIMT       | V309-17_1 | 30 | 2 | 23,7 |
| CIMT       | V309-17_2 | 30 | 2 | 33,5 |
| CIMT+G-CSF | V213-13_1 | 30 | 1 | 10,9 |
| CIMT+G-CSF | V213-16_1 | 30 | 2 | 25,4 |
| CIMT+G-CSF | V213-17_1 | 30 | 1 | 10,2 |
| CIMT+G-CSF | V213-17_2 | 30 | 3 | 31,9 |
| CIMT+G-CSF | V213-18_1 | 30 | 2 | 30,8 |
| CIMT+G-CSF | V213-18_2 | 30 | 2 | 24,8 |
| CIMT+G-CSF | V213-19_1 | 30 | 2 | 21   |
| CIMT+G-CSF | V213-19_2 | 30 | 1 | 10,7 |
| CIMT+G-CSF | V213-20_1 | 30 | 1 | 13,1 |
| CIMT+G-CSF | V213-22_1 | 30 | 1 | 10,1 |
| CIMT+G-CSF | V213-23_1 | 30 | 1 | 11,6 |
| CIMT+G-CSF | V214-14_1 | 30 | 0 | 0    |
| CIMT+G-CSF | V214-17_1 | 30 | 2 | 7,8  |
| CIMT+G-CSF | V214-18_1 | 30 | 1 | 10,6 |
| CIMT+G-CSF | V214-19_1 | 30 | 1 | 10,1 |
| CIMT+G-CSF | V214-19_2 | 30 | 2 | 25,2 |
| CIMT+G-CSF | V214-20_1 | 30 | 2 | 34,8 |
| CIMT+G-CSF | V214-21_1 | 30 | 1 | 10,9 |
| CIMT+G-CSF | V217-1_1  | 30 | 1 | 11,3 |
| CIMT+G-CSF | V217-2_1  | 30 | 0 | 3,5  |
| CIMT+G-CSF | V217-4_1  | 30 | 1 | 14,4 |
| CIMT+G-CSF | V217-6_1  | 30 | 1 | 13,4 |
| CIMT+G-CSF | V217-6_3  | 30 | 5 | 61,7 |
| CIMT+G-CSF | V217-8_1  | 30 | 1 | 13,4 |
| CIMT+G-CSF | V217-8_4  | 30 | 2 | 37,8 |
| CIMT+G-CSF | V217-10_1 | 30 | 1 | 10,2 |
| CIMT+G-CSF | V217-11_1 | 30 | 2 | 24,4 |
| CIMT+G-CSF | V304-16_1 | 30 | 1 | 11,7 |
| CIMT+G-CSF | V304-17_1 | 30 | 1 | 10,7 |
| CIMT+G-CSF | V304-17_2 | 30 | 1 | 10,9 |
| CIMT+G-CSF | V304-17_3 | 30 | 2 | 39,2 |
| CIMT+G-CSF | V304-17_4 | 30 | 1 | 13,1 |
| CIMT+G-CSF | V304-19_1 | 30 | 1 | 11,3 |
| CIMT+G-CSF | V304-19_2 | 30 | 1 | 13,5 |
| CIMT+G-CSF | V305-17_1 | 30 | 1 | 11,7 |
| CIMT+G-CSF | V305-17_2 | 30 | 2 | 30,3 |
| CIMT+G-CSF | V305-17_3 | 30 | 1 | 10,7 |
| CIMT+G-CSF | V305-18_1 | 30 | 1 | 10,5 |
| CIMT+G-CSF | V305-18_2 | 30 | 2 | 13,6 |
| CIMT+G-CSF | V305-18_3 | 30 | 1 | 10,9 |
| CIMT+G-CSF | V305-18_4 | 30 | 2 | 30,8 |
| CIMT+G-CSF | V305-19_1 | 30 | 1 | 12   |
| CIMT/G-CSF | V306-16_1 | 30 | 1 | 10,2 |

|            |           |    |   |      |
|------------|-----------|----|---|------|
| CIMT/G-CSF | V306-16_2 | 30 | 2 | 24,2 |
| CIMT/G-CSF | V306-17_1 | 30 | 1 | 10,6 |
| CIMT/G-CSF | V306-17_2 | 30 | 3 | 47,7 |
| CIMT/G-CSF | V306-17_3 | 30 | 1 | 11,7 |
| CIMT/G-CSF | V306-17_4 | 30 | 1 | 10,3 |
| CIMT/G-CSF | V306-17_5 | 30 | 1 | 13,2 |
| CIMT/G-CSF | V311-16_1 | 30 | 1 | 13,7 |
| CIMT/G-CSF | V311-17_1 | 30 | 1 | 11,9 |
| CIMT/G-CSF | V311-17_2 | 30 | 1 | 11,3 |
| CIMT/G-CSF | V311-19_1 | 30 | 1 | 14,1 |
| CIMT/G-CSF | V311-20_1 | 30 | 1 | 11,6 |
| CIMT/G-CSF | V311-20_2 | 30 | 3 | 43,3 |
| CIMT/G-CSF | V311-20_3 | 30 | 3 | 31,8 |
| CIMT/G-CSF | V313-14_1 | 30 | 3 | 38,1 |
| CIMT/G-CSF | V313-15_1 | 30 | 1 | 10,4 |
| CIMT/G-CSF | V313-15_2 | 30 | 1 | 12,2 |
| CIMT/G-CSF | V313-17_1 | 30 | 2 | 34,6 |
| CIMT/G-CSF | V313-17_2 | 30 | 4 | 59,8 |
| CIMT/G-CSF | V313-17_3 | 30 | 2 | 17,3 |
| CIMT/G-CSF | V313-19_1 | 30 | 1 | 13,4 |
| CIMT/G-CSF | V314-16_1 | 30 | 3 | 68,7 |
| CIMT/G-CSF | V314-16_2 | 30 | 1 | 10,3 |
| CIMT/G-CSF | V314-17_1 | 30 | 2 | 27,9 |
| CIMT/G-CSF | V314-17_2 | 30 | 2 | 10,7 |
| CIMT/G-CSF | V314-17_3 | 30 | 1 | 10,7 |
| CIMT/G-CSF | V314-18_1 | 30 | 1 | 10,2 |
| CIMT/G-CSF | V314-18_2 | 30 | 2 | 18,4 |
| CIMT/G-CSF | V315-11_1 | 30 | 3 | 32,9 |
| CIMT/G-CSF | V315-11_2 | 30 | 2 | 15,5 |
| CIMT/G-CSF | V315-13_1 | 30 | 1 | 10,4 |
| CIMT/G-CSF | V315-13_2 | 30 | 3 | 37,5 |
| CIMT/G-CSF | V315-14_1 | 30 | 1 | 10,6 |
| CIMT/G-CSF | V315-14_2 | 30 | 3 | 28,6 |
| CIMT/G-CSF | V315-14_3 | 30 | 1 | 20,2 |
| G-CSF      | V220-9_1  | 30 | 1 | 10,2 |
| G-CSF      | V220-11_1 | 30 | 1 | 16,8 |
| G-CSF      | V220-12_1 | 30 | 2 | 28   |
| G-CSF      | V220-16_1 | 30 | 1 | 13,1 |
| G-CSF      | V220-16_2 | 30 | 3 | 62,8 |
| G-CSF      | V220-17_1 | 30 | 2 | 16,7 |
| G-CSF      | V220-18_1 | 30 | 1 | 11,3 |
| G-CSF      | V221-2_1  | 30 | 1 | 10,2 |
| G-CSF      | V221-4_1  | 30 | 1 | 10,7 |
| G-CSF      | V221-5_1  | 30 | 3 | 35   |
| G-CSF      | V221-6_1  | 30 | 2 | 22,1 |
| G-CSF      | V221-7_1  | 30 | 2 | 21,8 |
| G-CSF      | V221-7_2  | 30 | 1 | 11,5 |
| G-CSF      | V221-11_1 | 30 | 1 | 10,2 |
| G-CSF      | V221-13_1 | 30 | 3 | 48,4 |
| G-CSF      | V221-15_1 | 30 | 1 | 10,1 |
| G-CSF      | V221-20_1 | 30 | 1 | 10,1 |
| G-CSF      | V222-19_1 | 30 | 1 | 11,6 |
| G-CSF      | V222-19_2 | 30 | 1 | 11,3 |
| G-CSF      | V222-20_1 | 30 | 1 | 10,8 |
| G-CSF      | V222-20_2 | 30 | 1 | 10,1 |
| G-CSF      | V222-21_1 | 30 | 1 | 10,1 |

|       |           |    |   |      |
|-------|-----------|----|---|------|
| G-CSF | V222-22_1 | 30 | 3 | 57,7 |
| G-CSF | V222-22_2 | 30 | 1 | 10,2 |
| G-CSF | V222-23_1 | 30 | 2 | 26,1 |
| G-CSF | V222-24_1 | 30 | 1 | 12,3 |
| G-CSF | V301-18_1 | 30 | 1 | 12,1 |
| G-CSF | V301-18_2 | 30 | 1 | 12,5 |
| G-CSF | V301-18_3 | 30 | 1 | 11,2 |
| G-CSF | V301-19_1 | 30 | 3 | 36,3 |
| G-CSF | V301-19_2 | 30 | 2 | 23,8 |
| G-CSF | V301-20_1 | 30 | 4 | 72,1 |
| G-CSF | V301-20_2 | 30 | 1 | 10,1 |
| G-CSF | V302-15_1 | 30 | 1 | 10,6 |
| G-CSF | V302-15_2 | 30 | 1 | 12,4 |
| G-CSF | V302-15_3 | 30 | 1 | 10,3 |
| G-CSF | V302-16_1 | 30 | 3 | 34,7 |
| G-CSF | V302-16_2 | 30 | 1 | 10,3 |
| G-CSF | V302-16_3 | 30 | 1 | 11,9 |
| G-CSF | V302-16_4 | 30 | 1 | 10,7 |
| G-CSF | V302-17_1 | 30 | 1 | 11,5 |
| G-CSF | V302-17_2 | 30 | 2 | 17,8 |
| G-CSF | V302-17_3 | 30 | 1 | 10,3 |
| G-CSF | V303-15_1 | 30 | 1 | 13,3 |
| G-CSF | V303-15_2 | 30 | 5 | 36,5 |
| G-CSF | V303-15_3 | 30 | 1 | 13,3 |
| G-CSF | V303-16_1 | 30 | 3 | 28,3 |
| G-CSF | V303-16_2 | 30 | 2 | 14   |
| G-CSF | V303-16_3 | 30 | 1 | 10,9 |
| G-CSF | V303-17_1 | 30 | 1 | 11,4 |

**apical dendrite Sholl 40 $\mu$ m**

| <b>Group</b> | <b>number</b> | <b>Radius(<math>\mu</math>m)</b> | <b>Intersections</b> | <b>Length(<math>\mu</math>m)</b> |
|--------------|---------------|----------------------------------|----------------------|----------------------------------|
| Control      | V215-10_1     | 40                               | 2                    | 36,3                             |
| Control      | V215-10_2     | 40                               | 1                    | 11,4                             |
| Control      | V215-11_1     | 40                               | 1                    | 11,5                             |
| Control      | V215-12_1     | 40                               | 1                    | 30,6                             |
| Control      | V215-12_2     | 40                               | 2                    | 30,5                             |
| Control      | V215-13_1     | 40                               | 2                    | 25,3                             |
| Control      | V215-15_1     | 40                               | 3                    | 84,9                             |
| Control      | V215-15_2     | 40                               | 2                    | 24,1                             |
| Control      | V215-16_1     | 40                               | 5                    | 90,7                             |
| Control      | V215-18_1     | 40                               | 2                    | 31,2                             |
| Control      | V216-11_1     | 40                               | 2                    | 25,7                             |
| Control      | V216-12_1     | 40                               | 2                    | 23,3                             |
| Control      | V216-13_1     | 40                               | 1                    | 13,1                             |
| Control      | V216-14_1     | 40                               | 2                    | 34,6                             |
| Control      | V216-14_2     | 40                               | 1                    | 12                               |
| Control      | V216-16_1     | 40                               | 2                    | 21,6                             |
| Control      | V216-16_2     | 40                               | 2                    | 47,2                             |
| Control      | V216-17_1     | 40                               | 2                    | 29,6                             |
| Control      | V216-18_1     | 40                               | 1                    | 10,1                             |
| Control      | V216-18_2     | 40                               | 1                    | 10,9                             |
| Control      | V219-6_1      | 40                               | 1                    | 12,8                             |
| Control      | V219-11_1     | 40                               | 1                    | 11,2                             |
| Control      | V219-12_1     | 40                               | 1                    | 10,2                             |

|         |           |    |   |      |
|---------|-----------|----|---|------|
| Control | V219-13_1 | 40 | 4 | 50,4 |
| Control | V219-13_2 | 40 | 1 | 14,8 |
| Control | V219-14_1 | 40 | 2 | 24,5 |
| Control | V219-14_2 | 40 | 2 | 28,1 |
| Control | V219-16_1 | 40 | 4 | 80,7 |
| Control | V297-19_1 | 40 | 1 | 10,4 |
| Control | V297-19_2 | 40 | 2 | 27   |
| Control | V297-20_1 | 40 | 1 | 15,8 |
| Control | V297-20_2 | 40 | 2 | 32,5 |
| Control | V297-20_3 | 40 | 1 | 39,8 |
| Control | V297-22_1 | 40 | 5 | 77,8 |
| Control | V297-22_2 | 40 | 2 | 25,3 |
| Control | V298-15_1 | 40 | 1 | 20,5 |
| Control | V298-16_1 | 40 | 3 | 41,4 |
| Control | V298-16_2 | 40 | 2 | 36,6 |
| Control | V298-16_3 | 40 | 5 | 57,2 |
| Control | V298-17_1 | 40 | 2 | 25,9 |
| Control | V298-17_2 | 40 | 2 | 24,1 |
| Control | V298-17_3 | 40 | 1 | 10,2 |
| Control | V308-17_1 | 40 | 4 | 60,6 |
| Control | V308-17_2 | 40 | 1 | 10,3 |
| Control | V308-17_3 | 40 | 2 | 33,2 |
| Control | V308-17_4 | 40 | 2 | 29,8 |
| Control | V308-18_1 | 40 | 2 | 27,7 |
| Control | V308-18_2 | 40 | 3 | 43,5 |
| Control | V308-18_3 | 40 | 5 | 68,4 |
| CIMT    | V211-10_1 | 40 | 2 | 24   |
| CIMT    | V211-10_2 | 40 | 1 | 13,1 |
| CIMT    | V211-11_1 | 40 | 1 | 11,4 |
| CIMT    | V211-11_2 | 40 | 2 | 38,6 |
| CIMT    | V211-12_1 | 40 | 1 | 10,6 |
| CIMT    | V211-13_1 | 40 | 3 | 35,9 |
| CIMT    | V211-13_2 | 40 | 7 | 67,2 |
| CIMT    | V211-15_1 | 40 | 2 | 32,3 |
| CIMT    | V211-15_2 | 40 | 2 | 23,5 |
| CIMT    | V211-16_1 | 40 | 1 | 11,2 |
| CIMT    | V212-14_1 | 40 | 1 | 10,2 |
| CIMT    | V212-14_2 | 40 | 4 | 45,4 |
| CIMT    | V212-15_1 | 40 | 4 | 62,6 |
| CIMT    | V212-18_1 | 40 | 3 | 40,6 |
| CIMT    | V212-21_1 | 40 | 1 | 10,2 |
| CIMT    | V212-21_2 | 40 | 2 | 32,2 |
| CIMT    | V212-22_1 | 40 | 2 | 16,2 |
| CIMT    | V212-23_1 | 40 | 1 | 10   |
| CIMT    | V212-23_2 | 40 | 1 | 10,1 |
| CIMT    | V212-24_1 | 40 | 2 | 25,2 |
| CIMT    | V218-9_1  | 40 | 2 | 39,2 |
| CIMT    | V218-10_1 | 40 | 3 | 69,3 |
| CIMT    | V218-11_1 | 40 | 2 | 26,2 |
| CIMT    | V218-12_1 | 40 | 4 | 49,9 |
| CIMT    | V218-12_2 | 40 | 3 | 46,6 |
| CIMT    | V218-13_1 | 40 | 1 | 13,7 |
| CIMT    | V218-15_1 | 40 | 4 | 37,4 |
| CIMT    | V218-17_1 | 40 | 2 | 22,2 |
| CIMT    | V299-14_1 | 40 | 3 | 70,3 |
| CIMT    | V299-15_1 | 40 | 1 | 10,2 |

|            |           |    |   |      |
|------------|-----------|----|---|------|
| CIMT       | V299-15_2 | 40 | 1 | 10,5 |
| CIMT       | V299-16_1 | 40 | 3 | 22,2 |
| CIMT       | V299-16_2 | 40 | 1 | 10,7 |
| CIMT       | V299-17_1 | 40 | 4 | 38,6 |
| CIMT       | V299-17_2 | 40 | 3 | 53,3 |
| CIMT       | V300-16_1 | 40 | 2 | 32,8 |
| CIMT       | V300-18_1 | 40 | 1 | 10,6 |
| CIMT       | V300-18_2 | 40 | 1 | 11,7 |
| CIMT       | V300-20_1 | 40 | 1 | 10,1 |
| CIMT       | V300-22_1 | 40 | 1 | 10,4 |
| CIMT       | V300-23_1 | 40 | 3 | 32,7 |
| CIMT       | V300-23_2 | 40 | 3 | 40,1 |
| CIMT       | V309-15_1 | 40 | 4 | 81,8 |
| CIMT       | V309-15_2 | 40 | 3 | 29,3 |
| CIMT       | V309-16_1 | 40 | 2 | 15,2 |
| CIMT       | V309-16_2 | 40 | 3 | 33,6 |
| CIMT       | V309-16_3 | 40 | 3 | 44,1 |
| CIMT       | V309-17_1 | 40 | 2 | 30,9 |
| CIMT       | V309-17_2 | 40 | 3 | 41,8 |
| CIMT+G-CSF | V213-13_1 | 40 | 2 | 19,9 |
| CIMT+G-CSF | V213-16_1 | 40 | 2 | 24,2 |
| CIMT+G-CSF | V213-17_1 | 40 | 1 | 10,1 |
| CIMT+G-CSF | V213-17_2 | 40 | 5 | 51,9 |
| CIMT+G-CSF | V213-18_1 | 40 | 2 | 25,9 |
| CIMT+G-CSF | V213-18_2 | 40 | 2 | 29   |
| CIMT+G-CSF | V213-19_1 | 40 | 2 | 32,4 |
| CIMT+G-CSF | V213-19_2 | 40 | 1 | 11,4 |
| CIMT+G-CSF | V213-20_1 | 40 | 1 | 21   |
| CIMT+G-CSF | V213-22_1 | 40 | 1 | 11   |
| CIMT+G-CSF | V213-23_1 | 40 | 1 | 10,7 |
| CIMT+G-CSF | V214-14_1 | 40 | 1 | 13,5 |
| CIMT+G-CSF | V214-17_1 | 40 | 4 | 67,1 |
| CIMT+G-CSF | V214-18_1 | 40 | 1 | 10,6 |
| CIMT+G-CSF | V214-19_1 | 40 | 1 | 10,1 |
| CIMT+G-CSF | V214-19_2 | 40 | 2 | 23,7 |
| CIMT+G-CSF | V214-20_1 | 40 | 2 | 25,1 |
| CIMT+G-CSF | V214-21_1 | 40 | 1 | 10,4 |
| CIMT+G-CSF | V217-1_1  | 40 | 1 | 10,3 |
| CIMT+G-CSF | V217-4_1  | 40 | 1 | 13,2 |
| CIMT+G-CSF | V217-6_1  | 40 | 1 | 15,3 |
| CIMT+G-CSF | V217-6_3  | 40 | 3 | 55,1 |
| CIMT+G-CSF | V217-8_1  | 40 | 2 | 23,7 |
| CIMT+G-CSF | V217-8_4  | 40 | 2 | 25,4 |
| CIMT+G-CSF | V217-10_1 | 40 | 1 | 12,3 |
| CIMT+G-CSF | V217-11_1 | 40 | 2 | 22,1 |
| CIMT+G-CSF | V304-16_1 | 40 | 1 | 14   |
| CIMT+G-CSF | V304-17_1 | 40 | 1 | 10,2 |
| CIMT+G-CSF | V304-17_2 | 40 | 1 | 15,7 |
| CIMT+G-CSF | V304-17_3 | 40 | 4 | 37   |
| CIMT+G-CSF | V304-17_4 | 40 | 1 | 10,6 |
| CIMT+G-CSF | V304-19_1 | 40 | 1 | 10,1 |
| CIMT+G-CSF | V304-19_2 | 40 | 1 | 11   |
| CIMT+G-CSF | V305-17_1 | 40 | 1 | 11,5 |
| CIMT+G-CSF | V305-17_2 | 40 | 2 | 28,2 |
| CIMT+G-CSF | V305-17_3 | 40 | 2 | 29,5 |
| CIMT+G-CSF | V305-18_1 | 40 | 1 | 11,1 |

|            |           |    |   |      |
|------------|-----------|----|---|------|
| CIMT+G-CSF | V305-18_2 | 40 | 2 | 28   |
| CIMT+G-CSF | V305-18_3 | 40 | 1 | 10,5 |
| CIMT+G-CSF | V305-18_4 | 40 | 4 | 53,3 |
| CIMT+G-CSF | V305-19_1 | 40 | 2 | 35,5 |
| CIMT/G-CSF | V306-16_1 | 40 | 1 | 12,2 |
| CIMT/G-CSF | V306-16_2 | 40 | 5 | 82,5 |
| CIMT/G-CSF | V306-17_1 | 40 | 2 | 44,1 |
| CIMT/G-CSF | V306-17_2 | 40 | 3 | 54,6 |
| CIMT/G-CSF | V306-17_3 | 40 | 1 | 10,7 |
| CIMT/G-CSF | V306-17_4 | 40 | 1 | 15,1 |
| CIMT/G-CSF | V306-17_5 | 40 | 1 | 11,9 |
| CIMT/G-CSF | V311-16_1 | 40 | 2 | 32,4 |
| CIMT/G-CSF | V311-17_1 | 40 | 1 | 10,7 |
| CIMT/G-CSF | V311-17_2 | 40 | 1 | 11,1 |
| CIMT/G-CSF | V311-19_1 | 40 | 1 | 10,2 |
| CIMT/G-CSF | V311-20_1 | 40 | 1 | 10,4 |
| CIMT/G-CSF | V311-20_2 | 40 | 4 | 57,6 |
| CIMT/G-CSF | V311-20_3 | 40 | 3 | 34,7 |
| CIMT/G-CSF | V313-14_1 | 40 | 6 | 78,5 |
| CIMT/G-CSF | V313-15_1 | 40 | 1 | 10,4 |
| CIMT/G-CSF | V313-15_2 | 40 | 1 | 13   |
| CIMT/G-CSF | V313-17_1 | 40 | 1 | 20,8 |
| CIMT/G-CSF | V313-17_2 | 40 | 2 | 38,9 |
| CIMT/G-CSF | V313-17_3 | 40 | 2 | 23,5 |
| CIMT/G-CSF | V313-19_1 | 40 | 1 | 10,2 |
| CIMT/G-CSF | V314-16_1 | 40 | 2 | 30,2 |
| CIMT/G-CSF | V314-16_2 | 40 | 1 | 10,4 |
| CIMT/G-CSF | V314-17_1 | 40 | 4 | 47,7 |
| CIMT/G-CSF | V314-17_2 | 40 | 3 | 23,2 |
| CIMT/G-CSF | V314-17_3 | 40 | 1 | 11,2 |
| CIMT/G-CSF | V314-18_1 | 40 | 1 | 10,1 |
| CIMT/G-CSF | V314-18_2 | 40 | 3 | 34,7 |
| CIMT/G-CSF | V315-11_1 | 40 | 2 | 49,9 |
| CIMT/G-CSF | V315-11_2 | 40 | 2 | 36,5 |
| CIMT/G-CSF | V315-13_1 | 40 | 1 | 11,2 |
| CIMT/G-CSF | V315-13_2 | 40 | 3 | 34,7 |
| CIMT/G-CSF | V315-14_1 | 40 | 1 | 11,1 |
| CIMT/G-CSF | V315-14_2 | 40 | 2 | 35,5 |
| CIMT/G-CSF | V315-14_3 | 40 | 1 | 10,8 |
| G-CSF      | V220-9_1  | 40 | 1 | 12,4 |
| G-CSF      | V220-11_1 | 40 | 1 | 10,6 |
| G-CSF      | V220-12_1 | 40 | 2 | 27,7 |
| G-CSF      | V220-16_1 | 40 | 1 | 13,5 |
| G-CSF      | V220-16_2 | 40 | 2 | 43,2 |
| G-CSF      | V220-17_1 | 40 | 4 | 63,4 |
| G-CSF      | V220-18_1 | 40 | 1 | 11,1 |
| G-CSF      | V221-2_1  | 40 | 0 | 0,1  |
| G-CSF      | V221-4_1  | 40 | 1 | 10,8 |
| G-CSF      | V221-5_1  | 40 | 3 | 35,9 |
| G-CSF      | V221-6_1  | 40 | 2 | 24,5 |
| G-CSF      | V221-7_1  | 40 | 3 | 27   |
| G-CSF      | V221-7_2  | 40 | 2 | 34   |
| G-CSF      | V221-11_1 | 40 | 1 | 10,6 |
| G-CSF      | V221-13_1 | 40 | 2 | 26,9 |
| G-CSF      | V221-15_1 | 40 | 2 | 38,6 |
| G-CSF      | V221-20_1 | 40 | 2 | 58,3 |

|       |           |    |   |      |
|-------|-----------|----|---|------|
| G-CSF | V222-19_1 | 40 | 1 | 15,2 |
| G-CSF | V222-19_2 | 40 | 1 | 10,3 |
| G-CSF | V222-20_1 | 40 | 3 | 70,1 |
| G-CSF | V222-20_2 | 40 | 1 | 13   |
| G-CSF | V222-21_1 | 40 | 3 | 28,1 |
| G-CSF | V222-22_1 | 40 | 3 | 34,1 |
| G-CSF | V222-22_2 | 40 | 1 | 10,2 |
| G-CSF | V222-23_1 | 40 | 3 | 54,2 |
| G-CSF | V222-24_1 | 40 | 3 | 68,3 |
| G-CSF | V301-18_1 | 40 | 1 | 10,5 |
| G-CSF | V301-18_2 | 40 | 1 | 11,3 |
| G-CSF | V301-18_3 | 40 | 1 | 10,7 |
| G-CSF | V301-19_1 | 40 | 5 | 45,5 |
| G-CSF | V301-19_2 | 40 | 2 | 25,2 |
| G-CSF | V301-20_1 | 40 | 4 | 51,8 |
| G-CSF | V301-20_2 | 40 | 2 | 39,7 |
| G-CSF | V302-15_1 | 40 | 1 | 12,1 |
| G-CSF | V302-15_2 | 40 | 1 | 14,6 |
| G-CSF | V302-15_3 | 40 | 4 | 45,2 |
| G-CSF | V302-16_1 | 40 | 3 | 41,8 |
| G-CSF | V302-16_2 | 40 | 1 | 13,1 |
| G-CSF | V302-16_3 | 40 | 1 | 10,9 |
| G-CSF | V302-16_4 | 40 | 1 | 11,1 |
| G-CSF | V302-17_1 | 40 | 2 | 22,9 |
| G-CSF | V302-17_2 | 40 | 3 | 24,9 |
| G-CSF | V302-17_3 | 40 | 1 | 12,2 |
| G-CSF | V303-15_1 | 40 | 1 | 12,1 |
| G-CSF | V303-15_2 | 40 | 5 | 127  |
| G-CSF | V303-15_3 | 40 | 1 | 10,8 |
| G-CSF | V303-16_1 | 40 | 3 | 40,2 |
| G-CSF | V303-16_2 | 40 | 2 | 43,2 |
| G-CSF | V303-16_3 | 40 | 3 | 70   |
| G-CSF | V303-17_1 | 40 | 1 | 10,4 |

#### apical dendrite Sholl 50µm

| Group   | number    | Radius(µm) | Intersections | Length(µm) |
|---------|-----------|------------|---------------|------------|
| Control | V215-10_1 | 50         | 2             | 23,4       |
| Control | V215-10_2 | 50         | 0             | 3,8        |
| Control | V215-11_1 | 50         | 1             | 10,9       |
| Control | V215-12_1 | 50         | 1             | 11,1       |
| Control | V215-12_2 | 50         | 2             | 41,9       |
| Control | V215-13_1 | 50         | 2             | 22,1       |
| Control | V215-15_1 | 50         | 4             | 75,1       |
| Control | V215-15_2 | 50         | 2             | 22,4       |
| Control | V215-16_1 | 50         | 5             | 59,8       |
| Control | V215-18_1 | 50         | 2             | 33,4       |
| Control | V216-11_1 | 50         | 3             | 26,2       |
| Control | V216-12_1 | 50         | 2             | 27,5       |
| Control | V216-13_1 | 50         | 1             | 11,9       |
| Control | V216-14_1 | 50         | 2             | 26,1       |
| Control | V216-14_2 | 50         | 1             | 11,6       |
| Control | V216-16_1 | 50         | 1             | 13,4       |
| Control | V216-16_2 | 50         | 3             | 37,5       |
| Control | V216-17_1 | 50         | 4             | 40         |

|         |           |    |   |       |
|---------|-----------|----|---|-------|
| Control | V216-18_1 | 50 | 1 | 10,2  |
| Control | V216-18_2 | 50 | 1 | 10,7  |
| Control | V219-6_1  | 50 | 1 | 11,3  |
| Control | V219-11_1 | 50 | 1 | 10,2  |
| Control | V219-12_1 | 50 | 1 | 10,2  |
| Control | V219-13_1 | 50 | 7 | 92,6  |
| Control | V219-13_2 | 50 | 1 | 12,3  |
| Control | V219-14_1 | 50 | 2 | 30,7  |
| Control | V219-14_2 | 50 | 7 | 66,7  |
| Control | V219-16_1 | 50 | 4 | 69,2  |
| Control | V297-19_1 | 50 | 2 | 33,7  |
| Control | V297-19_2 | 50 | 2 | 50,7  |
| Control | V297-20_1 | 50 | 2 | 19,4  |
| Control | V297-20_2 | 50 | 2 | 27,3  |
| Control | V297-20_3 | 50 | 1 | 10,1  |
| Control | V297-22_1 | 50 | 9 | 117,9 |
| Control | V297-22_2 | 50 | 2 | 49,8  |
| Control | V298-15_1 | 50 | 4 | 65,4  |
| Control | V298-16_1 | 50 | 3 | 49,7  |
| Control | V298-16_2 | 50 | 3 | 54    |
| Control | V298-16_3 | 50 | 3 | 71,5  |
| Control | V298-17_1 | 50 | 2 | 24,3  |
| Control | V298-17_2 | 50 | 2 | 21,1  |
| Control | V298-17_3 | 50 | 1 | 11,3  |
| Control | V308-17_1 | 50 | 3 | 58,2  |
| Control | V308-17_2 | 50 | 2 | 33,8  |
| Control | V308-17_3 | 50 | 3 | 41,1  |
| Control | V308-17_4 | 50 | 3 | 53,2  |
| Control | V308-18_1 | 50 | 2 | 34    |
| Control | V308-18_2 | 50 | 5 | 45,8  |
| Control | V308-18_3 | 50 | 6 | 86,5  |
| CIMT    | V211-10_1 | 50 | 4 | 66,8  |
| CIMT    | V211-10_2 | 50 | 1 | 10,6  |
| CIMT    | V211-11_1 | 50 | 1 | 10,6  |
| CIMT    | V211-11_2 | 50 | 1 | 18,7  |
| CIMT    | V211-12_1 | 50 | 1 | 10,2  |
| CIMT    | V211-13_1 | 50 | 4 | 48,7  |
| CIMT    | V211-13_2 | 50 | 4 | 84,5  |
| CIMT    | V211-15_1 | 50 | 2 | 22,7  |
| CIMT    | V211-15_2 | 50 | 2 | 21,8  |
| CIMT    | V211-16_1 | 50 | 1 | 12,9  |
| CIMT    | V212-14_1 | 50 | 2 | 17    |
| CIMT    | V212-14_2 | 50 | 6 | 86,6  |
| CIMT    | V212-15_1 | 50 | 6 | 59,3  |
| CIMT    | V212-18_1 | 50 | 3 | 32,8  |
| CIMT    | V212-21_1 | 50 | 1 | 10,4  |
| CIMT    | V212-21_2 | 50 | 3 | 39,7  |
| CIMT    | V212-22_1 | 50 | 2 | 25,2  |
| CIMT    | V212-23_1 | 50 | 2 | 35,1  |
| CIMT    | V212-23_2 | 50 | 2 | 42,3  |
| CIMT    | V212-24_1 | 50 | 3 | 27,1  |
| CIMT    | V218-9_1  | 50 | 1 | 14,3  |
| CIMT    | V218-10_1 | 50 | 4 | 63,8  |
| CIMT    | V218-11_1 | 50 | 1 | 24    |
| CIMT    | V218-12_1 | 50 | 6 | 88,3  |
| CIMT    | V218-12_2 | 50 | 3 | 50,5  |



|            |           |    |    |       |
|------------|-----------|----|----|-------|
| CIMT       | V218-13_1 | 50 | 1  | 11    |
| CIMT       | V218-15_1 | 50 | 10 | 128,5 |
| CIMT       | V218-17_1 | 50 | 3  | 35,2  |
| CIMT       | V299-14_1 | 50 | 4  | 65,7  |
| CIMT       | V299-15_1 | 50 | 1  | 10,6  |
| CIMT       | V299-15_2 | 50 | 1  | 13    |
| CIMT       | V299-16_1 | 50 | 3  | 88,4  |
| CIMT       | V299-16_2 | 50 | 1  | 10,6  |
| CIMT       | V299-17_1 | 50 | 5  | 71,4  |
| CIMT       | V299-17_2 | 50 | 3  | 51,5  |
| CIMT       | V300-16_1 | 50 | 2  | 23,1  |
| CIMT       | V300-18_1 | 50 | 1  | 10,1  |
| CIMT       | V300-18_2 | 50 | 1  | 11    |
| CIMT       | V300-20_1 | 50 | 1  | 11,3  |
| CIMT       | V300-22_1 | 50 | 1  | 10,5  |
| CIMT       | V300-23_1 | 50 | 4  | 60,8  |
| CIMT       | V300-23_2 | 50 | 5  | 69,9  |
| CIMT       | V309-15_1 | 50 | 5  | 59,8  |
| CIMT       | V309-15_2 | 50 | 3  | 36,4  |
| CIMT       | V309-16_1 | 50 | 2  | 65,7  |
| CIMT       | V309-16_2 | 50 | 2  | 33,4  |
| CIMT       | V309-16_3 | 50 | 5  | 112,7 |
| CIMT       | V309-17_1 | 50 | 3  | 68,7  |
| CIMT       | V309-17_2 | 50 | 2  | 23,3  |
| CIMT+G-CSF | V213-13_1 | 50 | 2  | 23,2  |
| CIMT+G-CSF | V213-16_1 | 50 | 3  | 30,6  |
| CIMT+G-CSF | V213-17_1 | 50 | 2  | 15,4  |
| CIMT+G-CSF | V213-17_2 | 50 | 5  | 70,2  |
| CIMT+G-CSF | V213-18_1 | 50 | 4  | 46,2  |
| CIMT+G-CSF | V213-18_2 | 50 | 3  | 44,7  |
| CIMT+G-CSF | V213-19_1 | 50 | 2  | 32,5  |
| CIMT+G-CSF | V213-19_2 | 50 | 1  | 13,1  |
| CIMT+G-CSF | V213-20_1 | 50 | 4  | 31,8  |
| CIMT+G-CSF | V213-22_1 | 50 | 2  | 24,9  |
| CIMT+G-CSF | V213-23_1 | 50 | 1  | 13    |
| CIMT+G-CSF | V214-14_1 | 50 | 1  | 14    |
| CIMT+G-CSF | V214-17_1 | 50 | 2  | 43    |
| CIMT+G-CSF | V214-18_1 | 50 | 1  | 10,3  |
| CIMT+G-CSF | V214-19_1 | 50 | 3  | 53    |
| CIMT+G-CSF | V214-19_2 | 50 | 2  | 21,6  |
| CIMT+G-CSF | V214-20_1 | 50 | 2  | 25,3  |
| CIMT+G-CSF | V214-21_1 | 50 | 1  | 10,9  |
| CIMT+G-CSF | V217-1_1  | 50 | 1  | 10,5  |
| CIMT+G-CSF | V217-4_1  | 50 | 1  | 12,4  |
| CIMT+G-CSF | V217-6_1  | 50 | 3  | 15,1  |
| CIMT+G-CSF | V217-6_3  | 50 | 3  | 47,4  |
| CIMT+G-CSF | V217-8_1  | 50 | 3  | 49,5  |
| CIMT+G-CSF | V217-8_4  | 50 | 3  | 50,7  |
| CIMT+G-CSF | V217-10_1 | 50 | 1  | 10    |
| CIMT+G-CSF | V217-11_1 | 50 | 2  | 20,8  |
| CIMT+G-CSF | V304-16_1 | 50 | 0  | 12,9  |
| CIMT+G-CSF | V304-17_1 | 50 | 1  | 13,4  |
| CIMT+G-CSF | V304-17_2 | 50 | 1  | 11,1  |
| CIMT+G-CSF | V304-17_3 | 50 | 4  | 52,2  |
| CIMT+G-CSF | V304-17_4 | 50 | 1  | 10,8  |
| CIMT+G-CSF | V304-19_1 | 50 | 1  | 11,3  |

|            |           |    |   |       |
|------------|-----------|----|---|-------|
| CIMT+G-CSF | V304-19_2 | 50 | 2 | 20,8  |
| CIMT+G-CSF | V305-17_1 | 50 | 3 | 55,4  |
| CIMT+G-CSF | V305-17_2 | 50 | 2 | 22,9  |
| CIMT+G-CSF | V305-17_3 | 50 | 2 | 43,6  |
| CIMT+G-CSF | V305-18_1 | 50 | 1 | 12    |
| CIMT+G-CSF | V305-18_2 | 50 | 2 | 25,2  |
| CIMT+G-CSF | V305-18_3 | 50 | 1 | 10,4  |
| CIMT+G-CSF | V305-18_4 | 50 | 4 | 45,2  |
| CIMT+G-CSF | V305-19_1 | 50 | 2 | 27,3  |
| CIMT/G-CSF | V306-16_1 | 50 | 2 | 25,8  |
| CIMT/G-CSF | V306-16_2 | 50 | 3 | 60,3  |
| CIMT/G-CSF | V306-17_1 | 50 | 4 | 36,3  |
| CIMT/G-CSF | V306-17_2 | 50 | 5 | 87,1  |
| CIMT/G-CSF | V306-17_3 | 50 | 1 | 11,1  |
| CIMT/G-CSF | V306-17_4 | 50 | 1 | 11,8  |
| CIMT/G-CSF | V306-17_5 | 50 | 1 | 10,5  |
| CIMT/G-CSF | V311-16_1 | 50 | 5 | 68,1  |
| CIMT/G-CSF | V311-17_1 | 50 | 2 | 72,4  |
| CIMT/G-CSF | V311-17_2 | 50 | 2 | 18,1  |
| CIMT/G-CSF | V311-19_1 | 50 | 1 | 12,5  |
| CIMT/G-CSF | V311-20_1 | 50 | 1 | 13,5  |
| CIMT/G-CSF | V311-20_2 | 50 | 4 | 50,6  |
| CIMT/G-CSF | V311-20_3 | 50 | 3 | 35,5  |
| CIMT/G-CSF | V313-14_1 | 50 | 6 | 151,9 |
| CIMT/G-CSF | V313-15_1 | 50 | 1 | 14,4  |
| CIMT/G-CSF | V313-15_2 | 50 | 1 | 14,4  |
| CIMT/G-CSF | V313-17_1 | 50 | 1 | 10,7  |
| CIMT/G-CSF | V313-17_2 | 50 | 3 | 31,7  |
| CIMT/G-CSF | V313-17_3 | 50 | 2 | 23,1  |
| CIMT/G-CSF | V313-19_1 | 50 | 1 | 10,2  |
| CIMT/G-CSF | V314-16_1 | 50 | 3 | 26,3  |
| CIMT/G-CSF | V314-16_2 | 50 | 1 | 10,2  |
| CIMT/G-CSF | V314-17_1 | 50 | 6 | 124,7 |
| CIMT/G-CSF | V314-17_2 | 50 | 3 | 35,5  |
| CIMT/G-CSF | V314-17_3 | 50 | 1 | 10,7  |
| CIMT/G-CSF | V314-18_1 | 50 | 1 | 10,6  |
| CIMT/G-CSF | V314-18_2 | 50 | 3 | 83,4  |
| CIMT/G-CSF | V315-11_1 | 50 | 2 | 24,3  |
| CIMT/G-CSF | V315-11_2 | 50 | 5 | 66,3  |
| CIMT/G-CSF | V315-13_1 | 50 | 2 | 15,9  |
| CIMT/G-CSF | V315-13_2 | 50 | 4 | 40,5  |
| CIMT/G-CSF | V315-14_1 | 50 | 3 | 43,6  |
| CIMT/G-CSF | V315-14_2 | 50 | 3 | 31,6  |
| CIMT/G-CSF | V315-14_3 | 50 | 1 | 11,4  |
| G-CSF      | V220-9_1  | 50 | 4 | 43,2  |
| G-CSF      | V220-11_1 | 50 | 1 | 10,6  |
| G-CSF      | V220-12_1 | 50 | 2 | 22,2  |
| G-CSF      | V220-16_1 | 50 | 1 | 20,9  |
| G-CSF      | V220-16_2 | 50 | 7 | 98,2  |
| G-CSF      | V220-17_1 | 50 | 4 | 91,1  |
| G-CSF      | V220-18_1 | 50 | 2 | 12,9  |
| G-CSF      | V221-4_1  | 50 | 1 | 12,3  |
| G-CSF      | V221-5_1  | 50 | 5 | 56,9  |
| G-CSF      | V221-6_1  | 50 | 3 | 33,2  |
| G-CSF      | V221-7_1  | 50 | 3 | 43,8  |
| G-CSF      | V221-7_2  | 50 | 2 | 33    |

|       |           |    |   |      |
|-------|-----------|----|---|------|
| G-CSF | V221-11_1 | 50 | 2 | 28,4 |
| G-CSF | V221-13_1 | 50 | 2 | 24,4 |
| G-CSF | V221-15_1 | 50 | 2 | 41,9 |
| G-CSF | V221-20_1 | 50 | 1 | 27,2 |
| G-CSF | V222-19_1 | 50 | 5 | 53,3 |
| G-CSF | V222-19_2 | 50 | 1 | 10,2 |
| G-CSF | V222-20_1 | 50 | 3 | 40,6 |
| G-CSF | V222-20_2 | 50 | 1 | 10,5 |
| G-CSF | V222-21_1 | 50 | 4 | 58,7 |
| G-CSF | V222-22_1 | 50 | 3 | 32,1 |
| G-CSF | V222-22_2 | 50 | 1 | 10,7 |
| G-CSF | V222-23_1 | 50 | 3 | 35,5 |
| G-CSF | V222-24_1 | 50 | 2 | 37,4 |
| G-CSF | V301-18_1 | 50 | 1 | 11,2 |
| G-CSF | V301-18_2 | 50 | 1 | 13,9 |
| G-CSF | V301-18_3 | 50 | 1 | 10   |
| G-CSF | V301-19_1 | 50 | 6 | 55,4 |
| G-CSF | V301-19_2 | 50 | 3 | 23,1 |
| G-CSF | V301-20_1 | 50 | 6 | 64,6 |
| G-CSF | V301-20_2 | 50 | 2 | 66,5 |
| G-CSF | V302-15_1 | 50 | 1 | 10,1 |
| G-CSF | V302-15_2 | 50 | 2 | 31,8 |
| G-CSF | V302-15_3 | 50 | 3 | 76,9 |
| G-CSF | V302-16_1 | 50 | 3 | 36   |
| G-CSF | V302-16_2 | 50 | 1 | 11,7 |
| G-CSF | V302-16_3 | 50 | 1 | 10,4 |
| G-CSF | V302-16_4 | 50 | 3 | 46,3 |
| G-CSF | V302-17_1 | 50 | 1 | 33,7 |
| G-CSF | V302-17_2 | 50 | 3 | 52,5 |
| G-CSF | V302-17_3 | 50 | 2 | 19   |
| G-CSF | V303-15_1 | 50 | 1 | 11,2 |
| G-CSF | V303-15_2 | 50 | 7 | 91,8 |
| G-CSF | V303-15_3 | 50 | 1 | 11,4 |
| G-CSF | V303-16_1 | 50 | 3 | 36,5 |
| G-CSF | V303-16_2 | 50 | 3 | 36,4 |
| G-CSF | V303-16_3 | 50 | 2 | 34,8 |
| G-CSF | V303-17_1 | 50 | 1 | 12,2 |

apical dendrite Sholl 60 $\mu$ m

| Group   | number    | Radius( $\mu$ m) | Intersections | Length( $\mu$ m) |
|---------|-----------|------------------|---------------|------------------|
| Control | V215-10_1 | 60               | 1             | 22               |
| Control | V215-11_1 | 60               | 1             | 10,9             |
| Control | V215-12_1 | 60               | 1             | 10,2             |
| Control | V215-12_2 | 60               | 1             | 13,6             |
| Control | V215-13_1 | 60               | 3             | 41,8             |
| Control | V215-15_1 | 60               | 2             | 33,3             |
| Control | V215-15_2 | 60               | 2             | 21,4             |
| Control | V215-16_1 | 60               | 5             | 62,9             |
| Control | V215-18_1 | 60               | 2             | 42,7             |
| Control | V216-11_1 | 60               | 4             | 64,5             |
| Control | V216-12_1 | 60               | 2             | 26,7             |
| Control | V216-13_1 | 60               | 1             | 13,4             |
| Control | V216-14_1 | 60               | 2             | 24,1             |
| Control | V216-14_2 | 60               | 1             | 13,1             |
| Control | V216-16_1 | 60               | 1             | 10,8             |
| Control | V216-16_2 | 60               | 2             | 30,9             |
| Control | V216-17_1 | 60               | 6             | 99,4             |
| Control | V216-18_1 | 60               | 1             | 10,6             |
| Control | V216-18_2 | 60               | 1             | 11,6             |
| Control | V219-6_1  | 60               | 1             | 10,9             |
| Control | V219-11_1 | 60               | 2             | 30,3             |
| Control | V219-12_1 | 60               | 1             | 11,3             |
| Control | V219-13_1 | 60               | 3             | 60,6             |
| Control | V219-13_2 | 60               | 1             | 15,5             |
| Control | V219-14_1 | 60               | 2             | 28,7             |
| Control | V219-14_2 | 60               | 4             | 66,9             |
| Control | V219-16_1 | 60               | 2             | 34,9             |
| Control | V297-19_1 | 60               | 1             | 24,6             |
| Control | V297-19_2 | 60               | 2             | 32,6             |
| Control | V297-20_1 | 60               | 1             | 27,8             |
| Control | V297-20_2 | 60               | 3             | 31,7             |
| Control | V297-20_3 | 60               | 1             | 10,3             |
| Control | V297-22_1 | 60               | 7             | 101,5            |
| Control | V297-22_2 | 60               | 2             | 22,4             |
| Control | V298-15_1 | 60               | 5             | 75,3             |
| Control | V298-16_1 | 60               | 3             | 47,5             |
| Control | V298-16_2 | 60               | 3             | 43,3             |
| Control | V298-16_3 | 60               | 2             | 59,9             |
| Control | V298-17_1 | 60               | 3             | 33,3             |
| Control | V298-17_2 | 60               | 2             | 20,6             |
| Control | V298-17_3 | 60               | 1             | 10,2             |
| Control | V308-17_1 | 60               | 2             | 30,3             |
| Control | V308-17_2 | 60               | 2             | 26,8             |
| Control | V308-17_3 | 60               | 3             | 52,9             |
| Control | V308-17_4 | 60               | 3             | 33,9             |
| Control | V308-18_1 | 60               | 3             | 46,4             |
| Control | V308-18_2 | 60               | 6             | 126              |
| Control | V308-18_3 | 60               | 6             | 78,4             |
| CIMT    | V211-10_1 | 60               | 4             | 55,6             |
| CIMT    | V211-10_2 | 60               | 3             | 59,6             |
| CIMT    | V211-11_1 | 60               | 2             | 15,2             |
| CIMT    | V211-11_2 | 60               | 1             | 15               |
| CIMT    | V211-12_1 | 60               | 1             | 10,1             |

|            |           |    |    |       |
|------------|-----------|----|----|-------|
| CIMT       | V211-13_1 | 60 | 3  | 57,6  |
| CIMT       | V211-13_2 | 60 | 3  | 51,6  |
| CIMT       | V211-15_1 | 60 | 2  | 20,3  |
| CIMT       | V211-15_2 | 60 | 1  | 20    |
| CIMT       | V211-16_1 | 60 | 4  | 13,2  |
| CIMT       | V212-14_1 | 60 | 2  | 55,9  |
| CIMT       | V212-14_2 | 60 | 8  | 115,5 |
| CIMT       | V212-15_1 | 60 | 11 | 168,2 |
| CIMT       | V212-18_1 | 60 | 3  | 31,8  |
| CIMT       | V212-21_1 | 60 | 2  | 16,3  |
| CIMT       | V212-21_2 | 60 | 3  | 43,8  |
| CIMT       | V212-22_1 | 60 | 1  | 13,9  |
| CIMT       | V212-23_1 | 60 | 3  | 37,6  |
| CIMT       | V212-23_2 | 60 | 2  | 25,3  |
| CIMT       | V212-24_1 | 60 | 5  | 89,5  |
| CIMT       | V218-9_1  | 60 | 1  | 10,1  |
| CIMT       | V218-10_1 | 60 | 4  | 54,7  |
| CIMT       | V218-11_1 | 60 | 1  | 18    |
| CIMT       | V218-12_1 | 60 | 5  | 76,6  |
| CIMT       | V218-12_2 | 60 | 4  | 46,9  |
| CIMT       | V218-13_1 | 60 | 1  | 11,1  |
| CIMT       | V218-15_1 | 60 | 9  | 144,7 |
| CIMT       | V218-17_1 | 60 | 3  | 44,1  |
| CIMT       | V299-14_1 | 60 | 4  | 86,6  |
| CIMT       | V299-15_1 | 60 | 1  | 10,8  |
| CIMT       | V299-15_2 | 60 | 1  | 10,5  |
| CIMT       | V299-16_1 | 60 | 2  | 43,9  |
| CIMT       | V299-16_2 | 60 | 1  | 11,1  |
| CIMT       | V299-17_1 | 60 | 7  | 84,2  |
| CIMT       | V299-17_2 | 60 | 3  | 39,6  |
| CIMT       | V300-16_1 | 60 | 3  | 41,8  |
| CIMT       | V300-18_1 | 60 | 2  | 23,2  |
| CIMT       | V300-18_2 | 60 | 1  | 10,2  |
| CIMT       | V300-20_1 | 60 | 1  | 10,1  |
| CIMT       | V300-22_1 | 60 | 1  | 10,1  |
| CIMT       | V300-23_1 | 60 | 5  | 82,5  |
| CIMT       | V300-23_2 | 60 | 4  | 72,9  |
| CIMT       | V309-15_1 | 60 | 3  | 50,3  |
| CIMT       | V309-15_2 | 60 | 3  | 32,2  |
| CIMT       | V309-16_1 | 60 | 2  | 23,4  |
| CIMT       | V309-16_2 | 60 | 2  | 27    |
| CIMT       | V309-16_3 | 60 | 4  | 90,5  |
| CIMT       | V309-17_1 | 60 | 4  | 77,3  |
| CIMT       | V309-17_2 | 60 | 3  | 27,5  |
| CIMT+G-CSF | V213-13_1 | 60 | 2  | 22,2  |
| CIMT+G-CSF | V213-16_1 | 60 | 3  | 36,4  |
| CIMT+G-CSF | V213-17_1 | 60 | 2  | 20,9  |
| CIMT+G-CSF | V213-17_2 | 60 | 6  | 61,7  |
| CIMT+G-CSF | V213-18_1 | 60 | 6  | 84,3  |
| CIMT+G-CSF | V213-18_2 | 60 | 3  | 43,8  |
| CIMT+G-CSF | V213-19_1 | 60 | 2  | 24    |
| CIMT+G-CSF | V213-19_2 | 60 | 1  | 10,4  |
| CIMT+G-CSF | V213-20_1 | 60 | 3  | 45,8  |
| CIMT+G-CSF | V213-22_1 | 60 | 2  | 26,5  |
| CIMT+G-CSF | V213-23_1 | 60 | 1  | 12,1  |
| CIMT+G-CSF | V214-14_1 | 60 | 1  | 12    |

|            |           |    |   |      |
|------------|-----------|----|---|------|
| CIMT+G-CSF | V214-17_1 | 60 | 2 | 65,2 |
| CIMT+G-CSF | V214-18_1 | 60 | 2 | 15,1 |
| CIMT+G-CSF | V214-19_1 | 60 | 3 | 62,5 |
| CIMT+G-CSF | V214-19_2 | 60 | 2 | 21,6 |
| CIMT+G-CSF | V214-20_1 | 60 | 6 | 63,3 |
| CIMT+G-CSF | V214-21_1 | 60 | 1 | 10,6 |
| CIMT+G-CSF | V217-1_1  | 60 | 1 | 14,1 |
| CIMT+G-CSF | V217-4_1  | 60 | 1 | 12,8 |
| CIMT+G-CSF | V217-6_1  | 60 | 4 | 99   |
| CIMT+G-CSF | V217-6_3  | 60 | 1 | 24,9 |
| CIMT+G-CSF | V217-8_1  | 60 | 2 | 48   |
| CIMT+G-CSF | V217-8_4  | 60 | 3 | 41,9 |
| CIMT+G-CSF | V217-10_1 | 60 | 1 | 12,3 |
| CIMT+G-CSF | V217-11_1 | 60 | 2 | 22,6 |
| CIMT+G-CSF | V304-17_1 | 60 | 2 | 35,9 |
| CIMT+G-CSF | V304-17_2 | 60 | 1 | 11,7 |
| CIMT+G-CSF | V304-17_3 | 60 | 4 | 49,1 |
| CIMT+G-CSF | V304-17_4 | 60 | 1 | 11,6 |
| CIMT+G-CSF | V304-19_1 | 60 | 1 | 11,1 |
| CIMT+G-CSF | V304-19_2 | 60 | 2 | 42,7 |
| CIMT+G-CSF | V305-17_1 | 60 | 2 | 24,9 |
| CIMT+G-CSF | V305-17_2 | 60 | 2 | 23,5 |
| CIMT+G-CSF | V305-17_3 | 60 | 3 | 28,6 |
| CIMT+G-CSF | V305-18_1 | 60 | 2 | 28,2 |
| CIMT+G-CSF | V305-18_2 | 60 | 3 | 52,4 |
| CIMT+G-CSF | V305-18_3 | 60 | 1 | 11,9 |
| CIMT+G-CSF | V305-18_4 | 60 | 4 | 50,2 |
| CIMT+G-CSF | V305-19_1 | 60 | 1 | 11,2 |
| CIMT/G-CSF | V306-16_1 | 60 | 3 | 27,3 |
| CIMT/G-CSF | V306-16_2 | 60 | 3 | 33,7 |
| CIMT/G-CSF | V306-17_1 | 60 | 6 | 96,8 |
| CIMT/G-CSF | V306-17_2 | 60 | 5 | 77,1 |
| CIMT/G-CSF | V306-17_3 | 60 | 1 | 10,9 |
| CIMT/G-CSF | V306-17_4 | 60 | 1 | 10,7 |
| CIMT/G-CSF | V306-17_5 | 60 | 2 | 17,3 |
| CIMT/G-CSF | V311-16_1 | 60 | 5 | 83,1 |
| CIMT/G-CSF | V311-17_1 | 60 | 3 | 40,9 |
| CIMT/G-CSF | V311-17_2 | 60 | 2 | 36,7 |
| CIMT/G-CSF | V311-19_1 | 60 | 2 | 22,8 |
| CIMT/G-CSF | V311-20_1 | 60 | 5 | 90,1 |
| CIMT/G-CSF | V311-20_2 | 60 | 8 | 51,7 |
| CIMT/G-CSF | V311-20_3 | 60 | 2 | 23,7 |
| CIMT/G-CSF | V313-14_1 | 60 | 6 | 94,7 |
| CIMT/G-CSF | V313-15_1 | 60 | 1 | 12   |
| CIMT/G-CSF | V313-15_2 | 60 | 1 | 12,1 |
| CIMT/G-CSF | V313-17_1 | 60 | 1 | 12,3 |
| CIMT/G-CSF | V313-17_2 | 60 | 2 | 37,2 |
| CIMT/G-CSF | V313-17_3 | 60 | 2 | 22,9 |
| CIMT/G-CSF | V313-19_1 | 60 | 1 | 10,3 |
| CIMT/G-CSF | V314-16_1 | 60 | 3 | 36,1 |
| CIMT/G-CSF | V314-16_2 | 60 | 3 | 39,5 |
| CIMT/G-CSF | V314-17_1 | 60 | 5 | 87,6 |
| CIMT/G-CSF | V314-17_2 | 60 | 4 | 49,3 |
| CIMT/G-CSF | V314-17_3 | 60 | 1 | 11   |
| CIMT/G-CSF | V314-18_1 | 60 | 5 | 56,5 |
| CIMT/G-CSF | V314-18_2 | 60 | 3 | 37,9 |

|            |           |    |   |       |
|------------|-----------|----|---|-------|
| CIMT/G-CSF | V315-11_1 | 60 | 2 | 25,2  |
| CIMT/G-CSF | V315-11_2 | 60 | 3 | 60,6  |
| CIMT/G-CSF | V315-13_1 | 60 | 2 | 43,8  |
| CIMT/G-CSF | V315-13_2 | 60 | 4 | 58,6  |
| CIMT/G-CSF | V315-14_1 | 60 | 1 | 16,5  |
| CIMT/G-CSF | V315-14_2 | 60 | 3 | 39,6  |
| CIMT/G-CSF | V315-14_3 | 60 | 1 | 13,4  |
| G-CSF      | V220-9_1  | 60 | 3 | 94,1  |
| G-CSF      | V220-11_1 | 60 | 1 | 10,4  |
| G-CSF      | V220-12_1 | 60 | 2 | 22,5  |
| G-CSF      | V220-16_1 | 60 | 1 | 12,3  |
| G-CSF      | V220-16_2 | 60 | 4 | 82,6  |
| G-CSF      | V220-17_1 | 60 | 4 | 49    |
| G-CSF      | V220-18_1 | 60 | 2 | 27,2  |
| G-CSF      | V221-4_1  | 60 | 0 | 2,3   |
| G-CSF      | V221-5_1  | 60 | 2 | 37,8  |
| G-CSF      | V221-6_1  | 60 | 7 | 122   |
| G-CSF      | V221-7_1  | 60 | 5 | 53,5  |
| G-CSF      | V221-7_2  | 60 | 3 | 36    |
| G-CSF      | V221-11_1 | 60 | 2 | 23,1  |
| G-CSF      | V221-13_1 | 60 | 3 | 28,8  |
| G-CSF      | V221-15_1 | 60 | 2 | 24    |
| G-CSF      | V221-20_1 | 60 | 1 | 10,3  |
| G-CSF      | V222-19_1 | 60 | 3 | 75,7  |
| G-CSF      | V222-19_2 | 60 | 1 | 11,7  |
| G-CSF      | V222-20_1 | 60 | 3 | 86,1  |
| G-CSF      | V222-20_2 | 60 | 1 | 10,6  |
| G-CSF      | V222-21_1 | 60 | 5 | 67,6  |
| G-CSF      | V222-22_1 | 60 | 3 | 31,3  |
| G-CSF      | V222-22_2 | 60 | 1 | 29,3  |
| G-CSF      | V222-23_1 | 60 | 3 | 71,7  |
| G-CSF      | V222-24_1 | 60 | 2 | 30,2  |
| G-CSF      | V301-18_1 | 60 | 1 | 10,6  |
| G-CSF      | V301-18_2 | 60 | 1 | 11,2  |
| G-CSF      | V301-18_3 | 60 | 1 | 11,6  |
| G-CSF      | V301-19_1 | 60 | 5 | 116,3 |
| G-CSF      | V301-19_2 | 60 | 3 | 52,1  |
| G-CSF      | V301-20_1 | 60 | 6 | 105,6 |
| G-CSF      | V301-20_2 | 60 | 4 | 84,8  |
| G-CSF      | V302-15_1 | 60 | 2 | 22,4  |
| G-CSF      | V302-15_2 | 60 | 4 | 68,4  |
| G-CSF      | V302-15_3 | 60 | 3 | 46,7  |
| G-CSF      | V302-16_1 | 60 | 3 | 33,1  |
| G-CSF      | V302-16_2 | 60 | 1 | 10,5  |
| G-CSF      | V302-16_3 | 60 | 1 | 11,2  |
| G-CSF      | V302-16_4 | 60 | 4 | 74    |
| G-CSF      | V302-17_1 | 60 | 1 | 13,5  |
| G-CSF      | V302-17_2 | 60 | 3 | 39    |
| G-CSF      | V302-17_3 | 60 | 3 | 35    |
| G-CSF      | V303-15_1 | 60 | 1 | 10,1  |
| G-CSF      | V303-15_2 | 60 | 8 | 116,2 |
| G-CSF      | V303-15_3 | 60 | 1 | 11,1  |
| G-CSF      | V303-16_1 | 60 | 4 | 49    |
| G-CSF      | V303-16_2 | 60 | 4 | 75,7  |
| G-CSF      | V303-16_3 | 60 | 3 | 32,9  |
| G-CSF      | V303-17_1 | 60 | 1 | 12,4  |

**apical dendrite Sholl 70 $\mu$ m**

| <b>Group</b> | <b>number</b> | <b>Radius(<math>\mu</math>m)</b> | <b>Intersections</b> | <b>Length(<math>\mu</math>m)</b> |
|--------------|---------------|----------------------------------|----------------------|----------------------------------|
| Control      | V215-10_1     | 70                               | 1                    | 11,8                             |
| Control      | V215-11_1     | 70                               | 1                    | 10,2                             |
| Control      | V215-12_1     | 70                               | 2                    | 12,5                             |
| Control      | V215-12_2     | 70                               | 2                    | 36,9                             |
| Control      | V215-13_1     | 70                               | 3                    | 40,2                             |
| Control      | V215-15_1     | 70                               | 1                    | 15,6                             |
| Control      | V215-15_2     | 70                               | 2                    | 23,7                             |
| Control      | V215-16_1     | 70                               | 5                    | 74,4                             |
| Control      | V215-18_1     | 70                               | 2                    | 28,5                             |
| Control      | V216-11_1     | 70                               | 4                    | 69,8                             |
| Control      | V216-12_1     | 70                               | 1                    | 36,2                             |
| Control      | V216-13_1     | 70                               | 1                    | 11,3                             |
| Control      | V216-14_1     | 70                               | 2                    | 26,7                             |
| Control      | V216-14_2     | 70                               | 1                    | 10,2                             |
| Control      | V216-16_1     | 70                               | 1                    | 10,3                             |
| Control      | V216-16_2     | 70                               | 2                    | 28,7                             |
| Control      | V216-17_1     | 70                               | 5                    | 136,8                            |
| Control      | V216-18_1     | 70                               | 1                    | 13,4                             |
| Control      | V216-18_2     | 70                               | 1                    | 10,1                             |
| Control      | V219-6_1      | 70                               | 1                    | 14,4                             |
| Control      | V219-11_1     | 70                               | 2                    | 25,6                             |
| Control      | V219-12_1     | 70                               | 3                    | 41                               |
| Control      | V219-13_1     | 70                               | 3                    | 54,9                             |
| Control      | V219-13_2     | 70                               | 1                    | 19,8                             |
| Control      | V219-14_1     | 70                               | 1                    | 20,9                             |
| Control      | V219-14_2     | 70                               | 1                    | 28,2                             |
| Control      | V219-16_1     | 70                               | 2                    | 26,8                             |
| Control      | V297-19_1     | 70                               | 2                    | 48,8                             |
| Control      | V297-19_2     | 70                               | 2                    | 27                               |
| Control      | V297-20_1     | 70                               | 2                    | 22,7                             |
| Control      | V297-20_2     | 70                               | 2                    | 37,1                             |
| Control      | V297-20_3     | 70                               | 1                    | 11,9                             |
| Control      | V297-22_1     | 70                               | 6                    | 104,3                            |
| Control      | V297-22_2     | 70                               | 1                    | 14,4                             |
| Control      | V298-15_1     | 70                               | 5                    | 64,8                             |
| Control      | V298-16_1     | 70                               | 1                    | 23,3                             |
| Control      | V298-16_2     | 70                               | 3                    | 36                               |
| Control      | V298-16_3     | 70                               | 1                    | 16,4                             |
| Control      | V298-17_1     | 70                               | 2                    | 32,6                             |
| Control      | V298-17_2     | 70                               | 3                    | 26                               |
| Control      | V298-17_3     | 70                               | 2                    | 21,7                             |
| Control      | V308-17_1     | 70                               | 2                    | 32,2                             |
| Control      | V308-17_2     | 70                               | 3                    | 57,1                             |
| Control      | V308-17_3     | 70                               | 4                    | 37,1                             |
| Control      | V308-17_4     | 70                               | 3                    | 56,4                             |
| Control      | V308-18_1     | 70                               | 3                    | 54,4                             |
| Control      | V308-18_2     | 70                               | 6                    | 100,9                            |
| Control      | V308-18_3     | 70                               | 6                    | 79,9                             |
| CIMT         | V211-10_1     | 70                               | 4                    | 55,9                             |
| CIMT         | V211-10_2     | 70                               | 4                    | 55,4                             |
| CIMT         | V211-11_1     | 70                               | 2                    | 39,5                             |
| CIMT         | V211-11_2     | 70                               | 2                    | 26,5                             |



|            |           |    |   |       |
|------------|-----------|----|---|-------|
| CIMT       | V211-12_1 | 70 | 1 | 11,1  |
| CIMT       | V211-13_1 | 70 | 3 | 51,1  |
| CIMT       | V211-13_2 | 70 | 4 | 49    |
| CIMT       | V211-15_1 | 70 | 3 | 36,3  |
| CIMT       | V211-15_2 | 70 | 2 | 18,6  |
| CIMT       | V211-16_1 | 70 | 2 | 40    |
| CIMT       | V212-14_1 | 70 | 2 | 24,4  |
| CIMT       | V212-14_2 | 70 | 7 | 90,8  |
| CIMT       | V212-15_1 | 70 | 9 | 144,8 |
| CIMT       | V212-18_1 | 70 | 3 | 36,9  |
| CIMT       | V212-21_1 | 70 | 2 | 28,8  |
| CIMT       | V212-21_2 | 70 | 3 | 79,9  |
| CIMT       | V212-22_1 | 70 | 1 | 10,4  |
| CIMT       | V212-23_1 | 70 | 3 | 48    |
| CIMT       | V212-23_2 | 70 | 3 | 43,5  |
| CIMT       | V212-24_1 | 70 | 5 | 88,3  |
| CIMT       | V218-9_1  | 70 | 2 | 41,3  |
| CIMT       | V218-10_1 | 70 | 4 | 71,8  |
| CIMT       | V218-11_1 | 70 | 1 | 11,2  |
| CIMT       | V218-12_1 | 70 | 5 | 75    |
| CIMT       | V218-12_2 | 70 | 6 | 105,5 |
| CIMT       | V218-13_1 | 70 | 1 | 11,1  |
| CIMT       | V218-15_1 | 70 | 7 | 125,6 |
| CIMT       | V218-17_1 | 70 | 3 | 36,3  |
| CIMT       | V299-14_1 | 70 | 4 | 51,7  |
| CIMT       | V299-15_1 | 70 | 1 | 10,8  |
| CIMT       | V299-15_2 | 70 | 1 | 10,1  |
| CIMT       | V299-16_1 | 70 | 2 | 27,6  |
| CIMT       | V299-16_2 | 70 | 1 | 10,2  |
| CIMT       | V299-17_1 | 70 | 8 | 97,3  |
| CIMT       | V299-17_2 | 70 | 3 | 44,9  |
| CIMT       | V300-16_1 | 70 | 3 | 39,4  |
| CIMT       | V300-18_1 | 70 | 3 | 32    |
| CIMT       | V300-18_2 | 70 | 1 | 10,5  |
| CIMT       | V300-20_1 | 70 | 2 | 13    |
| CIMT       | V300-22_1 | 70 | 1 | 10,4  |
| CIMT       | V300-23_1 | 70 | 5 | 72,2  |
| CIMT       | V300-23_2 | 70 | 5 | 76,6  |
| CIMT       | V309-15_1 | 70 | 3 | 91,8  |
| CIMT       | V309-15_2 | 70 | 3 | 31,2  |
| CIMT       | V309-16_1 | 70 | 3 | 26,2  |
| CIMT       | V309-16_2 | 70 | 2 | 25,4  |
| CIMT       | V309-16_3 | 70 | 4 | 58    |
| CIMT       | V309-17_1 | 70 | 3 | 37    |
| CIMT       | V309-17_2 | 70 | 2 | 34,7  |
| CIMT+G-CSF | V213-13_1 | 70 | 2 | 20,3  |
| CIMT+G-CSF | V213-16_1 | 70 | 3 | 31,9  |
| CIMT+G-CSF | V213-17_1 | 70 | 2 | 22,8  |
| CIMT+G-CSF | V213-17_2 | 70 | 6 | 85,4  |
| CIMT+G-CSF | V213-18_1 | 70 | 6 | 101,4 |
| CIMT+G-CSF | V213-18_2 | 70 | 4 | 43,9  |
| CIMT+G-CSF | V213-19_1 | 70 | 2 | 21,4  |
| CIMT+G-CSF | V213-19_2 | 70 | 1 | 10,8  |
| CIMT+G-CSF | V213-20_1 | 70 | 3 | 48,8  |
| CIMT+G-CSF | V213-22_1 | 70 | 3 | 47,4  |
| CIMT+G-CSF | V213-23_1 | 70 | 2 | 27,5  |

|            |           |    |   |      |
|------------|-----------|----|---|------|
| CIMT+G-CSF | V214-14_1 | 70 | 2 | 47,5 |
| CIMT+G-CSF | V214-17_1 | 70 | 3 | 57,2 |
| CIMT+G-CSF | V214-18_1 | 70 | 2 | 26,3 |
| CIMT+G-CSF | V214-19_1 | 70 | 4 | 36,9 |
| CIMT+G-CSF | V214-19_2 | 70 | 3 | 29,7 |
| CIMT+G-CSF | V214-20_1 | 70 | 4 | 90,1 |
| CIMT+G-CSF | V214-21_1 | 70 | 3 | 44,5 |
| CIMT+G-CSF | V217-1_1  | 70 | 1 | 10,7 |
| CIMT+G-CSF | V217-4_1  | 70 | 1 | 11,7 |
| CIMT+G-CSF | V217-6_1  | 70 | 4 | 94   |
| CIMT+G-CSF | V217-6_3  | 70 | 1 | 10,9 |
| CIMT+G-CSF | V217-8_1  | 70 | 2 | 29,9 |
| CIMT+G-CSF | V217-8_4  | 70 | 3 | 45,1 |
| CIMT+G-CSF | V217-10_1 | 70 | 1 | 10,1 |
| CIMT+G-CSF | V217-11_1 | 70 | 2 | 24,8 |
| CIMT+G-CSF | V304-17_1 | 70 | 2 | 28,1 |
| CIMT+G-CSF | V304-17_2 | 70 | 1 | 11,1 |
| CIMT+G-CSF | V304-17_3 | 70 | 3 | 45,9 |
| CIMT+G-CSF | V304-17_4 | 70 | 1 | 10,4 |
| CIMT+G-CSF | V304-19_1 | 70 | 1 | 11,2 |
| CIMT+G-CSF | V304-19_2 | 70 | 2 | 30,6 |
| CIMT+G-CSF | V305-17_1 | 70 | 2 | 23,4 |
| CIMT+G-CSF | V305-17_2 | 70 | 1 | 18,9 |
| CIMT+G-CSF | V305-17_3 | 70 | 2 | 41,9 |
| CIMT+G-CSF | V305-18_1 | 70 | 3 | 45,3 |
| CIMT+G-CSF | V305-18_2 | 70 | 4 | 85,6 |
| CIMT+G-CSF | V305-18_3 | 70 | 2 | 15,5 |
| CIMT+G-CSF | V305-18_4 | 70 | 3 | 50,2 |
| CIMT+G-CSF | V305-19_1 | 70 | 1 | 10,6 |
| CIMT/G-CSF | V306-16_1 | 70 | 5 | 87,6 |
| CIMT/G-CSF | V306-16_2 | 70 | 4 | 38,2 |
| CIMT/G-CSF | V306-17_1 | 70 | 6 | 93,4 |
| CIMT/G-CSF | V306-17_2 | 70 | 5 | 78,5 |
| CIMT/G-CSF | V306-17_3 | 70 | 2 | 14   |
| CIMT/G-CSF | V306-17_4 | 70 | 1 | 10,5 |
| CIMT/G-CSF | V306-17_5 | 70 | 2 | 21   |
| CIMT/G-CSF | V311-16_1 | 70 | 6 | 88,5 |
| CIMT/G-CSF | V311-17_1 | 70 | 3 | 52,7 |
| CIMT/G-CSF | V311-17_2 | 70 | 4 | 54,3 |
| CIMT/G-CSF | V311-19_1 | 70 | 1 | 88,4 |
| CIMT/G-CSF | V311-20_1 | 70 | 5 | 93,6 |
| CIMT/G-CSF | V311-20_2 | 70 | 4 | 87   |
| CIMT/G-CSF | V311-20_3 | 70 | 2 | 20,5 |
| CIMT/G-CSF | V313-14_1 | 70 | 6 | 75   |
| CIMT/G-CSF | V313-15_1 | 70 | 2 | 26   |
| CIMT/G-CSF | V313-15_2 | 70 | 1 | 24,6 |
| CIMT/G-CSF | V313-17_1 | 70 | 1 | 10,7 |
| CIMT/G-CSF | V313-17_2 | 70 | 2 | 23,5 |
| CIMT/G-CSF | V313-17_3 | 70 | 2 | 23,2 |
| CIMT/G-CSF | V313-19_1 | 70 | 1 | 10,5 |
| CIMT/G-CSF | V314-16_1 | 70 | 5 | 70,1 |
| CIMT/G-CSF | V314-16_2 | 70 | 3 | 51,9 |
| CIMT/G-CSF | V314-17_1 | 70 | 5 | 85,5 |
| CIMT/G-CSF | V314-17_2 | 70 | 5 | 80,7 |
| CIMT/G-CSF | V314-17_3 | 70 | 3 | 34,6 |
| CIMT/G-CSF | V314-18_1 | 70 | 4 | 80,4 |

|            |           |    |   |       |
|------------|-----------|----|---|-------|
| CIMT/G-CSF | V314-18_2 | 70 | 2 | 60,1  |
| CIMT/G-CSF | V315-11_1 | 70 | 3 | 37,8  |
| CIMT/G-CSF | V315-11_2 | 70 | 2 | 51,6  |
| CIMT/G-CSF | V315-13_1 | 70 | 1 | 31,7  |
| CIMT/G-CSF | V315-13_2 | 70 | 5 | 59,5  |
| CIMT/G-CSF | V315-14_1 | 70 | 1 | 11,8  |
| CIMT/G-CSF | V315-14_2 | 70 | 2 | 29,3  |
| CIMT/G-CSF | V315-14_3 | 70 | 1 | 12,1  |
| G-CSF      | V220-9_1  | 70 | 4 | 69,2  |
| G-CSF      | V220-11_1 | 70 | 1 | 11,3  |
| G-CSF      | V220-12_1 | 70 | 2 | 20,8  |
| G-CSF      | V220-16_1 | 70 | 1 | 15,2  |
| G-CSF      | V220-16_2 | 70 | 3 | 58,3  |
| G-CSF      | V220-17_1 | 70 | 6 | 77,5  |
| G-CSF      | V220-18_1 | 70 | 2 | 23,7  |
| G-CSF      | V221-5_1  | 70 | 2 | 21,4  |
| G-CSF      | V221-6_1  | 70 | 7 | 153,3 |
| G-CSF      | V221-7_1  | 70 | 6 | 117,9 |
| G-CSF      | V221-7_2  | 70 | 4 | 39,6  |
| G-CSF      | V221-11_1 | 70 | 3 | 29,9  |
| G-CSF      | V221-13_1 | 70 | 3 | 35,2  |
| G-CSF      | V221-15_1 | 70 | 3 | 23,4  |
| G-CSF      | V221-20_1 | 70 | 1 | 10,7  |
| G-CSF      | V222-19_1 | 70 | 3 | 43,5  |
| G-CSF      | V222-19_2 | 70 | 1 | 10,4  |
| G-CSF      | V222-20_1 | 70 | 3 | 33,2  |
| G-CSF      | V222-20_2 | 70 | 1 | 13,7  |
| G-CSF      | V222-21_1 | 70 | 6 | 86,4  |
| G-CSF      | V222-22_1 | 70 | 5 | 66,1  |
| G-CSF      | V222-22_2 | 70 | 2 | 23,3  |
| G-CSF      | V222-23_1 | 70 | 3 | 42    |
| G-CSF      | V222-24_1 | 70 | 2 | 22,1  |
| G-CSF      | V301-18_1 | 70 | 1 | 10,5  |
| G-CSF      | V301-18_2 | 70 | 1 | 10,2  |
| G-CSF      | V301-18_3 | 70 | 1 | 10,8  |
| G-CSF      | V301-19_1 | 70 | 6 | 118   |
| G-CSF      | V301-19_2 | 70 | 4 | 56,8  |
| G-CSF      | V301-20_1 | 70 | 5 | 92    |
| G-CSF      | V301-20_2 | 70 | 5 | 106,3 |
| G-CSF      | V302-15_1 | 70 | 2 | 26,9  |
| G-CSF      | V302-15_2 | 70 | 4 | 57,6  |
| G-CSF      | V302-15_3 | 70 | 5 | 63,2  |
| G-CSF      | V302-16_1 | 70 | 3 | 37,9  |
| G-CSF      | V302-16_2 | 70 | 2 | 17,8  |
| G-CSF      | V302-16_3 | 70 | 1 | 11,7  |
| G-CSF      | V302-16_4 | 70 | 3 | 68,3  |
| G-CSF      | V302-17_1 | 70 | 1 | 11,6  |
| G-CSF      | V302-17_2 | 70 | 3 | 36,4  |
| G-CSF      | V302-17_3 | 70 | 4 | 64,3  |
| G-CSF      | V303-15_1 | 70 | 1 | 10,1  |
| G-CSF      | V303-15_2 | 70 | 7 | 126,1 |
| G-CSF      | V303-15_3 | 70 | 1 | 15,8  |
| G-CSF      | V303-16_1 | 70 | 4 | 60,6  |
| G-CSF      | V303-16_2 | 70 | 4 | 70,9  |
| G-CSF      | V303-16_3 | 70 | 3 | 33,3  |
| G-CSF      | V303-17_1 | 70 | 2 | 39,3  |

**apical dendrite Sholl 80 $\mu$ m**

| <b>Group</b> | <b>number</b> | <b>Radius(<math>\mu</math>m)</b> | <b>Intersections</b> | <b>Length(<math>\mu</math>m)</b> |
|--------------|---------------|----------------------------------|----------------------|----------------------------------|
| Control      | V215-10_1     | 80                               | 1                    | 14,2                             |
| Control      | V215-11_1     | 80                               | 2                    | 25,2                             |
| Control      | V215-12_1     | 80                               | 3                    | 76,4                             |
| Control      | V215-12_2     | 80                               | 2                    | 40                               |
| Control      | V215-13_1     | 80                               | 3                    | 37,6                             |
| Control      | V215-15_1     | 80                               | 1                    | 11,4                             |
| Control      | V215-15_2     | 80                               | 2                    | 22,2                             |
| Control      | V215-16_1     | 80                               | 8                    | 81,7                             |
| Control      | V215-18_1     | 80                               | 2                    | 24,3                             |
| Control      | V216-11_1     | 80                               | 4                    | 59,5                             |
| Control      | V216-12_1     | 80                               | 1                    | 11,2                             |
| Control      | V216-13_1     | 80                               | 1                    | 10,7                             |
| Control      | V216-14_1     | 80                               | 2                    | 23,8                             |
| Control      | V216-14_2     | 80                               | 1                    | 10,8                             |
| Control      | V216-16_1     | 80                               | 1                    | 12,5                             |
| Control      | V216-16_2     | 80                               | 4                    | 57,4                             |
| Control      | V216-17_1     | 80                               | 5                    | 86,4                             |
| Control      | V216-18_1     | 80                               | 1                    | 10,4                             |
| Control      | V216-18_2     | 80                               | 1                    | 12,3                             |
| Control      | V219-6_1      | 80                               | 3                    | 18,8                             |
| Control      | V219-11_1     | 80                               | 1                    | 16,5                             |
| Control      | V219-12_1     | 80                               | 3                    | 39,3                             |
| Control      | V219-13_1     | 80                               | 3                    | 39,4                             |
| Control      | V219-13_2     | 80                               | 1                    | 15,7                             |
| Control      | V219-14_1     | 80                               | 2                    | 31,3                             |
| Control      | V219-14_2     | 80                               | 2                    | 29                               |
| Control      | V219-16_1     | 80                               | 2                    | 29,7                             |
| Control      | V297-19_1     | 80                               | 2                    | 29                               |
| Control      | V297-19_2     | 80                               | 2                    | 26,4                             |
| Control      | V297-20_1     | 80                               | 2                    | 25,3                             |
| Control      | V297-20_2     | 80                               | 1                    | 23,7                             |
| Control      | V297-20_3     | 80                               | 1                    | 10,3                             |
| Control      | V297-22_1     | 80                               | 5                    | 76,9                             |
| Control      | V297-22_2     | 80                               | 1                    | 12,8                             |
| Control      | V298-15_1     | 80                               | 7                    | 97,5                             |
| Control      | V298-16_1     | 80                               | 2                    | 41,4                             |
| Control      | V298-16_2     | 80                               | 3                    | 34,2                             |
| Control      | V298-16_3     | 80                               | 1                    | 11,3                             |
| Control      | V298-17_1     | 80                               | 2                    | 22,9                             |
| Control      | V298-17_2     | 80                               | 3                    | 46,1                             |
| Control      | V298-17_3     | 80                               | 2                    | 23,5                             |
| Control      | V308-17_1     | 80                               | 1                    | 14,5                             |
| Control      | V308-17_2     | 80                               | 4                    | 93,2                             |
| Control      | V308-17_3     | 80                               | 5                    | 101,6                            |
| Control      | V308-17_4     | 80                               | 3                    | 35,9                             |
| Control      | V308-18_1     | 80                               | 2                    | 62,5                             |
| Control      | V308-18_2     | 80                               | 6                    | 76,5                             |
| Control      | V308-18_3     | 80                               | 6                    | 70,1                             |
| CIMT         | V211-10_1     | 80                               | 4                    | 43,7                             |
| CIMT         | V211-10_2     | 80                               | 4                    | 85,6                             |
| CIMT         | V211-11_1     | 80                               | 2                    | 33,1                             |
| CIMT         | V211-11_2     | 80                               | 2                    | 25,8                             |

|            |           |    |   |      |
|------------|-----------|----|---|------|
| CIMT       | V211-12_1 | 80 | 1 | 11,1 |
| CIMT       | V211-13_1 | 80 | 3 | 36,2 |
| CIMT       | V211-13_2 | 80 | 4 | 52,7 |
| CIMT       | V211-15_1 | 80 | 3 | 35,7 |
| CIMT       | V211-15_2 | 80 | 1 | 48,5 |
| CIMT       | V211-16_1 | 80 | 2 | 24,8 |
| CIMT       | V212-14_1 | 80 | 2 | 32,9 |
| CIMT       | V212-14_2 | 80 | 7 | 93,7 |
| CIMT       | V212-15_1 | 80 | 7 | 126  |
| CIMT       | V212-18_1 | 80 | 3 | 46,6 |
| CIMT       | V212-21_1 | 80 | 2 | 22,4 |
| CIMT       | V212-21_2 | 80 | 2 | 60,4 |
| CIMT       | V212-22_1 | 80 | 1 | 12,3 |
| CIMT       | V212-23_1 | 80 | 3 | 40,4 |
| CIMT       | V212-23_2 | 80 | 3 | 38,5 |
| CIMT       | V212-24_1 | 80 | 5 | 57,7 |
| CIMT       | V218-9_1  | 80 | 2 | 23,2 |
| CIMT       | V218-10_1 | 80 | 2 | 34,9 |
| CIMT       | V218-11_1 | 80 | 4 | 24,9 |
| CIMT       | V218-12_1 | 80 | 5 | 93,3 |
| CIMT       | V218-12_2 | 80 | 4 | 61,8 |
| CIMT       | V218-13_1 | 80 | 1 | 11   |
| CIMT       | V218-15_1 | 80 | 4 | 57,2 |
| CIMT       | V218-17_1 | 80 | 3 | 35,4 |
| CIMT       | V299-14_1 | 80 | 5 | 60,5 |
| CIMT       | V299-15_1 | 80 | 1 | 10,6 |
| CIMT       | V299-15_2 | 80 | 1 | 10,5 |
| CIMT       | V299-16_1 | 80 | 2 | 27   |
| CIMT       | V299-16_2 | 80 | 1 | 10,1 |
| CIMT       | V299-17_1 | 80 | 9 | 96,3 |
| CIMT       | V299-17_2 | 80 | 3 | 32,1 |
| CIMT       | V300-16_1 | 80 | 3 | 40,9 |
| CIMT       | V300-18_1 | 80 | 2 | 37,9 |
| CIMT       | V300-18_2 | 80 | 2 | 14,7 |
| CIMT       | V300-20_1 | 80 | 2 | 40,6 |
| CIMT       | V300-22_1 | 80 | 1 | 10,2 |
| CIMT       | V300-23_1 | 80 | 5 | 58,8 |
| CIMT       | V300-23_2 | 80 | 4 | 54,7 |
| CIMT       | V309-15_1 | 80 | 2 | 22,8 |
| CIMT       | V309-15_2 | 80 | 4 | 63,2 |
| CIMT       | V309-16_1 | 80 | 3 | 39   |
| CIMT       | V309-16_2 | 80 | 1 | 20,6 |
| CIMT       | V309-16_3 | 80 | 5 | 73,5 |
| CIMT       | V309-17_1 | 80 | 8 | 64,9 |
| CIMT       | V309-17_2 | 80 | 4 | 31   |
| CIMT+G-CSF | V213-13_1 | 80 | 3 | 35,5 |
| CIMT+G-CSF | V213-16_1 | 80 | 1 | 25,5 |
| CIMT+G-CSF | V213-17_1 | 80 | 2 | 25,7 |
| CIMT+G-CSF | V213-17_2 | 80 | 4 | 64   |
| CIMT+G-CSF | V213-18_1 | 80 | 4 | 55,3 |
| CIMT+G-CSF | V213-18_2 | 80 | 3 | 87,3 |
| CIMT+G-CSF | V213-19_1 | 80 | 2 | 21,2 |
| CIMT+G-CSF | V213-19_2 | 80 | 2 | 14,8 |
| CIMT+G-CSF | V213-20_1 | 80 | 2 | 21,6 |
| CIMT+G-CSF | V213-22_1 | 80 | 3 | 49,8 |
| CIMT+G-CSF | V213-23_1 | 80 | 3 | 33,5 |

|            |           |    |   |       |
|------------|-----------|----|---|-------|
| CIMT+G-CSF | V214-14_1 | 80 | 2 | 43,2  |
| CIMT+G-CSF | V214-17_1 | 80 | 4 | 69,7  |
| CIMT+G-CSF | V214-18_1 | 80 | 2 | 27,3  |
| CIMT+G-CSF | V214-19_1 | 80 | 3 | 74,4  |
| CIMT+G-CSF | V214-19_2 | 80 | 3 | 42,2  |
| CIMT+G-CSF | V214-20_1 | 80 | 2 | 37,8  |
| CIMT+G-CSF | V214-21_1 | 80 | 2 | 49,6  |
| CIMT+G-CSF | V217-1_1  | 80 | 1 | 11,3  |
| CIMT+G-CSF | V217-4_1  | 80 | 1 | 12,8  |
| CIMT+G-CSF | V217-6_1  | 80 | 3 | 53,1  |
| CIMT+G-CSF | V217-6_3  | 80 | 1 | 10,6  |
| CIMT+G-CSF | V217-8_1  | 80 | 2 | 29,7  |
| CIMT+G-CSF | V217-8_4  | 80 | 3 | 39,6  |
| CIMT+G-CSF | V217-10_1 | 80 | 1 | 10,7  |
| CIMT+G-CSF | V217-11_1 | 80 | 1 | 15,7  |
| CIMT+G-CSF | V304-17_1 | 80 | 2 | 24,9  |
| CIMT+G-CSF | V304-17_2 | 80 | 1 | 10,2  |
| CIMT+G-CSF | V304-17_3 | 80 | 3 | 42,8  |
| CIMT+G-CSF | V304-17_4 | 80 | 1 | 10,7  |
| CIMT+G-CSF | V304-19_1 | 80 | 1 | 12,8  |
| CIMT+G-CSF | V304-19_2 | 80 | 1 | 20,2  |
| CIMT+G-CSF | V305-17_1 | 80 | 2 | 27,6  |
| CIMT+G-CSF | V305-17_2 | 80 | 1 | 10,5  |
| CIMT+G-CSF | V305-17_3 | 80 | 2 | 29    |
| CIMT+G-CSF | V305-18_1 | 80 | 2 | 53,8  |
| CIMT+G-CSF | V305-18_2 | 80 | 3 | 53,9  |
| CIMT+G-CSF | V305-18_3 | 80 | 2 | 25,7  |
| CIMT+G-CSF | V305-18_4 | 80 | 3 | 44,2  |
| CIMT+G-CSF | V305-19_1 | 80 | 1 | 11,7  |
| CIMT/G-CSF | V306-16_1 | 80 | 5 | 81,7  |
| CIMT/G-CSF | V306-16_2 | 80 | 4 | 53,6  |
| CIMT/G-CSF | V306-17_1 | 80 | 8 | 120,7 |
| CIMT/G-CSF | V306-17_2 | 80 | 3 | 91    |
| CIMT/G-CSF | V306-17_3 | 80 | 5 | 103,9 |
| CIMT/G-CSF | V306-17_4 | 80 | 1 | 10,8  |
| CIMT/G-CSF | V306-17_5 | 80 | 2 | 21,2  |
| CIMT/G-CSF | V311-16_1 | 80 | 6 | 85,9  |
| CIMT/G-CSF | V311-17_1 | 80 | 3 | 46    |
| CIMT/G-CSF | V311-17_2 | 80 | 3 | 78,4  |
| CIMT/G-CSF | V311-19_1 | 80 | 1 | 10,8  |
| CIMT/G-CSF | V311-20_1 | 80 | 4 | 63,6  |
| CIMT/G-CSF | V311-20_2 | 80 | 3 | 59    |
| CIMT/G-CSF | V311-20_3 | 80 | 2 | 21,1  |
| CIMT/G-CSF | V313-14_1 | 80 | 6 | 70    |
| CIMT/G-CSF | V313-15_1 | 80 | 4 | 56    |
| CIMT/G-CSF | V313-15_2 | 80 | 1 | 12    |
| CIMT/G-CSF | V313-17_1 | 80 | 1 | 11,1  |
| CIMT/G-CSF | V313-17_2 | 80 | 2 | 23,5  |
| CIMT/G-CSF | V313-17_3 | 80 | 2 | 22,4  |
| CIMT/G-CSF | V313-19_1 | 80 | 4 | 51,9  |
| CIMT/G-CSF | V314-16_1 | 80 | 4 | 65,4  |
| CIMT/G-CSF | V314-16_2 | 80 | 3 | 61,6  |
| CIMT/G-CSF | V314-17_1 | 80 | 2 | 56,8  |
| CIMT/G-CSF | V314-17_2 | 80 | 5 | 59    |
| CIMT/G-CSF | V314-17_3 | 80 | 2 | 120,5 |
| CIMT/G-CSF | V314-18_1 | 80 | 3 | 58,1  |

|            |           |    |   |       |
|------------|-----------|----|---|-------|
| CIMT/G-CSF | V314-18_2 | 80 | 2 | 60    |
| CIMT/G-CSF | V315-11_1 | 80 | 2 | 36,5  |
| CIMT/G-CSF | V315-11_2 | 80 | 2 | 32,5  |
| CIMT/G-CSF | V315-13_1 | 80 | 1 | 10,1  |
| CIMT/G-CSF | V315-13_2 | 80 | 5 | 59,4  |
| CIMT/G-CSF | V315-14_1 | 80 | 1 | 12,2  |
| CIMT/G-CSF | V315-14_2 | 80 | 2 | 22,1  |
| CIMT/G-CSF | V315-14_3 | 80 | 2 | 18,8  |
| G-CSF      | V220-9_1  | 80 | 4 | 102,6 |
| G-CSF      | V220-11_1 | 80 | 1 | 10,3  |
| G-CSF      | V220-12_1 | 80 | 3 | 49    |
| G-CSF      | V220-16_1 | 80 | 1 | 18,5  |
| G-CSF      | V220-16_2 | 80 | 3 | 70,3  |
| G-CSF      | V220-17_1 | 80 | 5 | 95,5  |
| G-CSF      | V220-18_1 | 80 | 3 | 39,9  |
| G-CSF      | V221-5_1  | 80 | 2 | 23,2  |
| G-CSF      | V221-6_1  | 80 | 6 | 101   |
| G-CSF      | V221-7_1  | 80 | 5 | 74,1  |
| G-CSF      | V221-7_2  | 80 | 6 | 85,5  |
| G-CSF      | V221-11_1 | 80 | 3 | 40,3  |
| G-CSF      | V221-13_1 | 80 | 5 | 60,2  |
| G-CSF      | V221-15_1 | 80 | 3 | 35,2  |
| G-CSF      | V221-20_1 | 80 | 2 | 15    |
| G-CSF      | V222-19_1 | 80 | 2 | 23,7  |
| G-CSF      | V222-19_2 | 80 | 1 | 11,2  |
| G-CSF      | V222-20_1 | 80 | 5 | 47    |
| G-CSF      | V222-20_2 | 80 | 1 | 13,4  |
| G-CSF      | V222-21_1 | 80 | 3 | 62,8  |
| G-CSF      | V222-22_1 | 80 | 3 | 55,4  |
| G-CSF      | V222-22_2 | 80 | 2 | 27,2  |
| G-CSF      | V222-23_1 | 80 | 2 | 37,1  |
| G-CSF      | V222-24_1 | 80 | 3 | 26,8  |
| G-CSF      | V301-18_1 | 80 | 1 | 10,4  |
| G-CSF      | V301-18_2 | 80 | 1 | 10,5  |
| G-CSF      | V301-18_3 | 80 | 1 | 10,3  |
| G-CSF      | V301-19_1 | 80 | 5 | 73,2  |
| G-CSF      | V301-19_2 | 80 | 4 | 68,4  |
| G-CSF      | V301-20_1 | 80 | 4 | 54    |
| G-CSF      | V301-20_2 | 80 | 4 | 68    |
| G-CSF      | V302-15_1 | 80 | 2 | 37,4  |
| G-CSF      | V302-15_2 | 80 | 2 | 54,3  |
| G-CSF      | V302-15_3 | 80 | 4 | 61,7  |
| G-CSF      | V302-16_1 | 80 | 3 | 34,8  |
| G-CSF      | V302-16_2 | 80 | 2 | 25,7  |
| G-CSF      | V302-16_3 | 80 | 1 | 13,6  |
| G-CSF      | V302-16_4 | 80 | 3 | 44,2  |
| G-CSF      | V302-17_1 | 80 | 1 | 13,7  |
| G-CSF      | V302-17_2 | 80 | 3 | 33,8  |
| G-CSF      | V302-17_3 | 80 | 4 | 52,1  |
| G-CSF      | V303-15_1 | 80 | 1 | 11    |
| G-CSF      | V303-15_2 | 80 | 6 | 92,7  |
| G-CSF      | V303-15_3 | 80 | 1 | 10,4  |
| G-CSF      | V303-16_1 | 80 | 4 | 55,7  |
| G-CSF      | V303-16_2 | 80 | 4 | 82,6  |
| G-CSF      | V303-16_3 | 80 | 3 | 40,6  |
| G-CSF      | V303-17_1 | 80 | 5 | 59,1  |

**apical dendrite Sholl 90 $\mu$ m**

| <b>Group</b> | <b>number</b> | <b>Radius(<math>\mu</math>m)</b> | <b>Intersections</b> | <b>Length(<math>\mu</math>m)</b> |
|--------------|---------------|----------------------------------|----------------------|----------------------------------|
| Control      | V215-10_1     | 90                               | 1                    | 14,1                             |
| Control      | V215-11_1     | 90                               | 2                    | 27,2                             |
| Control      | V215-12_1     | 90                               | 2                    | 90,3                             |
| Control      | V215-12_2     | 90                               | 2                    | 22,6                             |
| Control      | V215-13_1     | 90                               | 2                    | 56,7                             |
| Control      | V215-15_1     | 90                               | 1                    | 10,4                             |
| Control      | V215-15_2     | 90                               | 3                    | 32                               |
| Control      | V215-16_1     | 90                               | 3                    | 42,4                             |
| Control      | V215-18_1     | 90                               | 2                    | 22,1                             |
| Control      | V216-11_1     | 90                               | 3                    | 38,8                             |
| Control      | V216-12_1     | 90                               | 1                    | 10,8                             |
| Control      | V216-13_1     | 90                               | 1                    | 11,1                             |
| Control      | V216-14_1     | 90                               | 2                    | 21                               |
| Control      | V216-14_2     | 90                               | 1                    | 11,5                             |
| Control      | V216-16_1     | 90                               | 1                    | 11,1                             |
| Control      | V216-16_2     | 90                               | 3                    | 45,6                             |
| Control      | V216-17_1     | 90                               | 4                    | 61,1                             |
| Control      | V216-18_1     | 90                               | 1                    | 10,6                             |
| Control      | V216-18_2     | 90                               | 2                    | 16,1                             |
| Control      | V219-6_1      | 90                               | 4                    | 84,6                             |
| Control      | V219-11_1     | 90                               | 1                    | 10,6                             |
| Control      | V219-12_1     | 90                               | 3                    | 37,9                             |
| Control      | V219-13_1     | 90                               | 5                    | 57,2                             |
| Control      | V219-13_2     | 90                               | 1                    | 17,6                             |
| Control      | V219-14_1     | 90                               | 2                    | 36                               |
| Control      | V219-14_2     | 90                               | 2                    | 30,3                             |
| Control      | V219-16_1     | 90                               | 2                    | 23,1                             |
| Control      | V297-19_1     | 90                               | 2                    | 29                               |
| Control      | V297-19_2     | 90                               | 1                    | 19,4                             |
| Control      | V297-20_1     | 90                               | 2                    | 22,6                             |
| Control      | V297-20_2     | 90                               | 1                    | 11,2                             |
| Control      | V297-20_3     | 90                               | 2                    | 35,2                             |
| Control      | V297-22_1     | 90                               | 5                    | 59,1                             |
| Control      | V297-22_2     | 90                               | 1                    | 13,1                             |
| Control      | V298-15_1     | 90                               | 7                    | 92,2                             |
| Control      | V298-16_1     | 90                               | 5                    | 53,4                             |
| Control      | V298-16_2     | 90                               | 2                    | 28,6                             |
| Control      | V298-16_3     | 90                               | 1                    | 10,6                             |
| Control      | V298-17_1     | 90                               | 2                    | 33,9                             |
| Control      | V298-17_2     | 90                               | 3                    | 34,5                             |
| Control      | V298-17_3     | 90                               | 2                    | 25,4                             |
| Control      | V308-17_1     | 90                               | 1                    | 10,9                             |
| Control      | V308-17_2     | 90                               | 4                    | 76,6                             |
| Control      | V308-17_3     | 90                               | 4                    | 84,8                             |
| Control      | V308-17_4     | 90                               | 2                    | 33,6                             |
| Control      | V308-18_1     | 90                               | 2                    | 32,2                             |
| Control      | V308-18_2     | 90                               | 4                    | 74,8                             |
| Control      | V308-18_3     | 90                               | 8                    | 132,2                            |
| CIMT         | V211-10_1     | 90                               | 6                    | 52,5                             |
| CIMT         | V211-10_2     | 90                               | 3                    | 61                               |
| CIMT         | V211-11_1     | 90                               | 2                    | 23,7                             |
| CIMT         | V211-11_2     | 90                               | 2                    | 24,2                             |



|            |           |    |    |       |
|------------|-----------|----|----|-------|
| CIMT       | V211-12_1 | 90 | 1  | 13,6  |
| CIMT       | V211-13_1 | 90 | 3  | 35,3  |
| CIMT       | V211-13_2 | 90 | 5  | 60,6  |
| CIMT       | V211-15_1 | 90 | 2  | 49,4  |
| CIMT       | V211-15_2 | 90 | 1  | 12    |
| CIMT       | V211-16_1 | 90 | 3  | 34,6  |
| CIMT       | V212-14_1 | 90 | 3  | 30,2  |
| CIMT       | V212-14_2 | 90 | 8  | 92,4  |
| CIMT       | V212-15_1 | 90 | 8  | 133   |
| CIMT       | V212-18_1 | 90 | 3  | 34,3  |
| CIMT       | V212-21_1 | 90 | 2  | 20,6  |
| CIMT       | V212-21_2 | 90 | 5  | 142,6 |
| CIMT       | V212-22_1 | 90 | 2  | 15,8  |
| CIMT       | V212-23_1 | 90 | 3  | 38,9  |
| CIMT       | V212-23_2 | 90 | 3  | 35,1  |
| CIMT       | V212-24_1 | 90 | 5  | 65,5  |
| CIMT       | V218-9_1  | 90 | 2  | 22,6  |
| CIMT       | V218-10_1 | 90 | 2  | 32,4  |
| CIMT       | V218-11_1 | 90 | 1  | 36,4  |
| CIMT       | V218-12_1 | 90 | 4  | 72,4  |
| CIMT       | V218-12_2 | 90 | 3  | 55,1  |
| CIMT       | V218-13_1 | 90 | 1  | 10,8  |
| CIMT       | V218-15_1 | 90 | 4  | 55    |
| CIMT       | V218-17_1 | 90 | 5  | 41,1  |
| CIMT       | V299-14_1 | 90 | 4  | 49,8  |
| CIMT       | V299-15_1 | 90 | 1  | 10,7  |
| CIMT       | V299-15_2 | 90 | 1  | 10,9  |
| CIMT       | V299-16_1 | 90 | 1  | 16,5  |
| CIMT       | V299-16_2 | 90 | 1  | 10,2  |
| CIMT       | V299-17_1 | 90 | 9  | 107,2 |
| CIMT       | V299-17_2 | 90 | 3  | 32,7  |
| CIMT       | V300-16_1 | 90 | 3  | 34,1  |
| CIMT       | V300-18_1 | 90 | 1  | 12,2  |
| CIMT       | V300-18_2 | 90 | 2  | 25,6  |
| CIMT       | V300-20_1 | 90 | 2  | 29,7  |
| CIMT       | V300-22_1 | 90 | 1  | 10,3  |
| CIMT       | V300-23_1 | 90 | 3  | 52,4  |
| CIMT       | V300-23_2 | 90 | 3  | 35,9  |
| CIMT       | V309-15_1 | 90 | 1  | 13,6  |
| CIMT       | V309-15_2 | 90 | 5  | 82,6  |
| CIMT       | V309-16_1 | 90 | 3  | 54,8  |
| CIMT       | V309-16_2 | 90 | 2  | 30,3  |
| CIMT       | V309-16_3 | 90 | 6  | 92,9  |
| CIMT       | V309-17_1 | 90 | 4  | 76,1  |
| CIMT       | V309-17_2 | 90 | 3  | 72,3  |
| CIMT+G-CSF | V213-13_1 | 90 | 3  | 40,3  |
| CIMT+G-CSF | V213-16_1 | 90 | 1  | 12,1  |
| CIMT+G-CSF | V213-17_1 | 90 | 3  | 35,4  |
| CIMT+G-CSF | V213-17_2 | 90 | 10 | 69,6  |
| CIMT+G-CSF | V213-18_1 | 90 | 4  | 94,7  |
| CIMT+G-CSF | V213-18_2 | 90 | 2  | 30,7  |
| CIMT+G-CSF | V213-19_1 | 90 | 2  | 32,9  |
| CIMT+G-CSF | V213-19_2 | 90 | 2  | 66,4  |
| CIMT+G-CSF | V213-20_1 | 90 | 2  | 22,2  |
| CIMT+G-CSF | V213-22_1 | 90 | 2  | 32,1  |
| CIMT+G-CSF | V213-23_1 | 90 | 1  | 28,7  |

|            |           |    |   |       |
|------------|-----------|----|---|-------|
| CIMT+G-CSF | V214-14_1 | 90 | 2 | 40,7  |
| CIMT+G-CSF | V214-17_1 | 90 | 3 | 48,8  |
| CIMT+G-CSF | V214-18_1 | 90 | 3 | 28,4  |
| CIMT+G-CSF | V214-19_1 | 90 | 3 | 37,5  |
| CIMT+G-CSF | V214-19_2 | 90 | 4 | 37,6  |
| CIMT+G-CSF | V214-20_1 | 90 | 4 | 28,2  |
| CIMT+G-CSF | V214-21_1 | 90 | 2 | 87,1  |
| CIMT+G-CSF | V217-1_1  | 90 | 1 | 12,5  |
| CIMT+G-CSF | V217-4_1  | 90 | 1 | 16,4  |
| CIMT+G-CSF | V217-6_1  | 90 | 3 | 56,2  |
| CIMT+G-CSF | V217-6_3  | 90 | 3 | 76    |
| CIMT+G-CSF | V217-8_1  | 90 | 2 | 24,7  |
| CIMT+G-CSF | V217-8_4  | 90 | 3 | 49,3  |
| CIMT+G-CSF | V217-10_1 | 90 | 1 | 13,3  |
| CIMT+G-CSF | V217-11_1 | 90 | 1 | 15,4  |
| CIMT+G-CSF | V304-17_1 | 90 | 2 | 29,9  |
| CIMT+G-CSF | V304-17_2 | 90 | 1 | 10,6  |
| CIMT+G-CSF | V304-17_3 | 90 | 3 | 41,8  |
| CIMT+G-CSF | V304-17_4 | 90 | 1 | 29,3  |
| CIMT+G-CSF | V304-19_1 | 90 | 2 | 20,4  |
| CIMT+G-CSF | V304-19_2 | 90 | 1 | 11,9  |
| CIMT+G-CSF | V305-17_1 | 90 | 1 | 17,6  |
| CIMT+G-CSF | V305-17_2 | 90 | 4 | 33,1  |
| CIMT+G-CSF | V305-17_3 | 90 | 1 | 13,5  |
| CIMT+G-CSF | V305-18_1 | 90 | 1 | 15,3  |
| CIMT+G-CSF | V305-18_2 | 90 | 3 | 41,7  |
| CIMT+G-CSF | V305-18_3 | 90 | 2 | 27,9  |
| CIMT+G-CSF | V305-18_4 | 90 | 2 | 32,1  |
| CIMT+G-CSF | V305-19_1 | 90 | 1 | 10,2  |
| CIMT/G-CSF | V306-16_1 | 90 | 4 | 66,9  |
| CIMT/G-CSF | V306-16_2 | 90 | 2 | 29    |
| CIMT/G-CSF | V306-17_1 | 90 | 8 | 150,3 |
| CIMT/G-CSF | V306-17_2 | 90 | 2 | 26,2  |
| CIMT/G-CSF | V306-17_3 | 90 | 5 | 63,3  |
| CIMT/G-CSF | V306-17_4 | 90 | 1 | 10,4  |
| CIMT/G-CSF | V306-17_5 | 90 | 2 | 22,3  |
| CIMT/G-CSF | V311-16_1 | 90 | 7 | 93,3  |
| CIMT/G-CSF | V311-17_1 | 90 | 5 | 107,3 |
| CIMT/G-CSF | V311-17_2 | 90 | 3 | 44    |
| CIMT/G-CSF | V311-19_1 | 90 | 2 | 59,3  |
| CIMT/G-CSF | V311-20_1 | 90 | 4 | 46,3  |
| CIMT/G-CSF | V311-20_2 | 90 | 2 | 49,3  |
| CIMT/G-CSF | V311-20_3 | 90 | 2 | 23    |
| CIMT/G-CSF | V313-14_1 | 90 | 5 | 64,2  |
| CIMT/G-CSF | V313-15_1 | 90 | 2 | 40,8  |
| CIMT/G-CSF | V313-15_2 | 90 | 1 | 10,6  |
| CIMT/G-CSF | V313-17_1 | 90 | 1 | 11,7  |
| CIMT/G-CSF | V313-17_2 | 90 | 2 | 21,9  |
| CIMT/G-CSF | V313-17_3 | 90 | 3 | 35,8  |
| CIMT/G-CSF | V313-19_1 | 90 | 2 | 28,9  |
| CIMT/G-CSF | V314-16_1 | 90 | 4 | 53,7  |
| CIMT/G-CSF | V314-16_2 | 90 | 4 | 57,3  |
| CIMT/G-CSF | V314-17_1 | 90 | 2 | 24,3  |
| CIMT/G-CSF | V314-17_2 | 90 | 4 | 50,7  |
| CIMT/G-CSF | V314-17_3 | 90 | 2 | 23,6  |
| CIMT/G-CSF | V314-18_1 | 90 | 3 | 39,8  |

|            |           |    |   |       |
|------------|-----------|----|---|-------|
| CIMT/G-CSF | V314-18_2 | 90 | 2 | 24,2  |
| CIMT/G-CSF | V315-11_1 | 90 | 2 | 25,2  |
| CIMT/G-CSF | V315-11_2 | 90 | 1 | 14,6  |
| CIMT/G-CSF | V315-13_1 | 90 | 1 | 10,1  |
| CIMT/G-CSF | V315-13_2 | 90 | 7 | 107,4 |
| CIMT/G-CSF | V315-14_1 | 90 | 1 | 10,3  |
| CIMT/G-CSF | V315-14_2 | 90 | 3 | 29    |
| CIMT/G-CSF | V315-14_3 | 90 | 2 | 25    |
| G-CSF      | V220-9_1  | 90 | 3 | 45,4  |
| G-CSF      | V220-11_1 | 90 | 1 | 13,2  |
| G-CSF      | V220-12_1 | 90 | 3 | 39,3  |
| G-CSF      | V220-16_1 | 90 | 0 | 0,3   |
| G-CSF      | V220-16_2 | 90 | 2 | 25,6  |
| G-CSF      | V220-17_1 | 90 | 6 | 71,3  |
| G-CSF      | V220-18_1 | 90 | 3 | 68,9  |
| G-CSF      | V221-5_1  | 90 | 2 | 21,7  |
| G-CSF      | V221-6_1  | 90 | 7 | 117,8 |
| G-CSF      | V221-7_1  | 90 | 4 | 45,1  |
| G-CSF      | V221-7_2  | 90 | 7 | 102,8 |
| G-CSF      | V221-11_1 | 90 | 3 | 38,1  |
| G-CSF      | V221-13_1 | 90 | 8 | 83,5  |
| G-CSF      | V221-15_1 | 90 | 2 | 29,9  |
| G-CSF      | V221-20_1 | 90 | 2 | 27,9  |
| G-CSF      | V222-19_1 | 90 | 2 | 23,2  |
| G-CSF      | V222-19_2 | 90 | 1 | 13    |
| G-CSF      | V222-20_1 | 90 | 3 | 67,5  |
| G-CSF      | V222-20_2 | 90 | 1 | 12,1  |
| G-CSF      | V222-21_1 | 90 | 3 | 33,8  |
| G-CSF      | V222-22_1 | 90 | 5 | 113,8 |
| G-CSF      | V222-22_2 | 90 | 1 | 10,5  |
| G-CSF      | V222-23_1 | 90 | 3 | 43,5  |
| G-CSF      | V222-24_1 | 90 | 3 | 48,9  |
| G-CSF      | V301-18_1 | 90 | 1 | 12,3  |
| G-CSF      | V301-18_2 | 90 | 2 | 17,5  |
| G-CSF      | V301-18_3 | 90 | 1 | 11,1  |
| G-CSF      | V301-19_1 | 90 | 4 | 56,8  |
| G-CSF      | V301-19_2 | 90 | 3 | 36,9  |
| G-CSF      | V301-20_1 | 90 | 4 | 48,2  |
| G-CSF      | V301-20_2 | 90 | 4 | 45    |
| G-CSF      | V302-15_1 | 90 | 3 | 40    |
| G-CSF      | V302-15_2 | 90 | 1 | 30,9  |
| G-CSF      | V302-15_3 | 90 | 4 | 46,7  |
| G-CSF      | V302-16_1 | 90 | 4 | 58    |
| G-CSF      | V302-16_2 | 90 | 1 | 23,4  |
| G-CSF      | V302-16_3 | 90 | 1 | 11,1  |
| G-CSF      | V302-16_4 | 90 | 3 | 38,7  |
| G-CSF      | V302-17_1 | 90 | 1 | 11,3  |
| G-CSF      | V302-17_2 | 90 | 4 | 80,4  |
| G-CSF      | V302-17_3 | 90 | 3 | 45,8  |
| G-CSF      | V303-15_1 | 90 | 1 | 10,7  |
| G-CSF      | V303-15_2 | 90 | 6 | 106,4 |
| G-CSF      | V303-15_3 | 90 | 1 | 10,5  |
| G-CSF      | V303-16_1 | 90 | 3 | 42,8  |
| G-CSF      | V303-16_2 | 90 | 3 | 47,7  |
| G-CSF      | V303-16_3 | 90 | 3 | 39,5  |
| G-CSF      | V303-17_1 | 90 | 5 | 68,3  |

**apical dendrite Sholl 100 $\mu$ m**

| <b>Group</b> | <b>number</b> | <b>Radius(<math>\mu</math>m)</b> | <b>Intersections</b> | <b>Length(<math>\mu</math>m)</b> |
|--------------|---------------|----------------------------------|----------------------|----------------------------------|
| Control      | V215-10_1     | 100                              | 0                    | 9,6                              |
| Control      | V215-11_1     | 100                              | 2                    | 25,7                             |
| Control      | V215-12_1     | 100                              | 2                    | 32,1                             |
| Control      | V215-12_2     | 100                              | 2                    | 22,6                             |
| Control      | V215-13_1     | 100                              | 2                    | 29,5                             |
| Control      | V215-15_1     | 100                              | 2                    | 18,7                             |
| Control      | V215-15_2     | 100                              | 4                    | 55,6                             |
| Control      | V215-16_1     | 100                              | 2                    | 33,3                             |
| Control      | V215-18_1     | 100                              | 2                    | 25,3                             |
| Control      | V216-11_1     | 100                              | 3                    | 45,5                             |
| Control      | V216-12_1     | 100                              | 2                    | 11,1                             |
| Control      | V216-13_1     | 100                              | 1                    | 11                               |
| Control      | V216-14_1     | 100                              | 3                    | 34,5                             |
| Control      | V216-14_2     | 100                              | 2                    | 30,8                             |
| Control      | V216-16_1     | 100                              | 1                    | 11,1                             |
| Control      | V216-16_2     | 100                              | 2                    | 26,2                             |
| Control      | V216-17_1     | 100                              | 3                    | 56,8                             |
| Control      | V216-18_1     | 100                              | 1                    | 11,4                             |
| Control      | V216-18_2     | 100                              | 2                    | 27,2                             |
| Control      | V219-6_1      | 100                              | 2                    | 59,3                             |
| Control      | V219-11_1     | 100                              | 1                    | 13,7                             |
| Control      | V219-12_1     | 100                              | 3                    | 37,6                             |
| Control      | V219-13_1     | 100                              | 3                    | 61                               |
| Control      | V219-13_2     | 100                              | 1                    | 12,3                             |
| Control      | V219-14_1     | 100                              | 2                    | 33,5                             |
| Control      | V219-14_2     | 100                              | 3                    | 27,6                             |
| Control      | V219-16_1     | 100                              | 1                    | 14,5                             |
| Control      | V297-19_1     | 100                              | 3                    | 38,5                             |
| Control      | V297-19_2     | 100                              | 1                    | 16,5                             |
| Control      | V297-20_1     | 100                              | 2                    | 30,8                             |
| Control      | V297-20_2     | 100                              | 1                    | 10,9                             |
| Control      | V297-20_3     | 100                              | 2                    | 51,2                             |
| Control      | V297-22_1     | 100                              | 5                    | 79,6                             |
| Control      | V297-22_2     | 100                              | 1                    | 11,5                             |
| Control      | V298-15_1     | 100                              | 6                    | 95,4                             |
| Control      | V298-16_1     | 100                              | 3                    | 68,1                             |
| Control      | V298-16_2     | 100                              | 3                    | 31,2                             |
| Control      | V298-16_3     | 100                              | 1                    | 10,2                             |
| Control      | V298-17_1     | 100                              | 1                    | 15,5                             |
| Control      | V298-17_2     | 100                              | 3                    | 33,5                             |
| Control      | V298-17_3     | 100                              | 2                    | 29,2                             |
| Control      | V308-17_1     | 100                              | 1                    | 10,4                             |
| Control      | V308-17_2     | 100                              | 2                    | 47                               |
| Control      | V308-17_3     | 100                              | 2                    | 43,4                             |
| Control      | V308-17_4     | 100                              | 1                    | 18,1                             |
| Control      | V308-18_1     | 100                              | 1                    | 21,3                             |
| Control      | V308-18_2     | 100                              | 4                    | 49,9                             |
| Control      | V308-18_3     | 100                              | 10                   | 159,7                            |
| CIMT         | V211-10_1     | 100                              | 6                    | 101,7                            |
| CIMT         | V211-10_2     | 100                              | 3                    | 56,4                             |
| CIMT         | V211-11_1     | 100                              | 6                    | 31,3                             |
| CIMT         | V211-11_2     | 100                              | 2                    | 27,4                             |

|            |           |     |   |       |
|------------|-----------|-----|---|-------|
| CIMT       | V211-12_1 | 100 | 2 | 23,2  |
| CIMT       | V211-13_1 | 100 | 3 | 35,5  |
| CIMT       | V211-13_2 | 100 | 6 | 65,1  |
| CIMT       | V211-15_1 | 100 | 1 | 26,5  |
| CIMT       | V211-15_2 | 100 | 1 | 11,2  |
| CIMT       | V211-16_1 | 100 | 4 | 60,7  |
| CIMT       | V212-14_1 | 100 | 3 | 48,3  |
| CIMT       | V212-14_2 | 100 | 9 | 114   |
| CIMT       | V212-15_1 | 100 | 7 | 100,4 |
| CIMT       | V212-18_1 | 100 | 4 | 60,4  |
| CIMT       | V212-21_1 | 100 | 2 | 23,9  |
| CIMT       | V212-21_2 | 100 | 5 | 106,8 |
| CIMT       | V212-22_1 | 100 | 3 | 74,9  |
| CIMT       | V212-23_1 | 100 | 3 | 42,3  |
| CIMT       | V212-23_2 | 100 | 3 | 35,2  |
| CIMT       | V212-24_1 | 100 | 4 | 61,2  |
| CIMT       | V218-9_1  | 100 | 2 | 24,1  |
| CIMT       | V218-10_1 | 100 | 1 | 32,6  |
| CIMT       | V218-11_1 | 100 | 1 | 10,3  |
| CIMT       | V218-12_1 | 100 | 3 | 49,5  |
| CIMT       | V218-12_2 | 100 | 2 | 48    |
| CIMT       | V218-13_1 | 100 | 0 | 6,1   |
| CIMT       | V218-15_1 | 100 | 2 | 31,2  |
| CIMT       | V218-17_1 | 100 | 5 | 84,5  |
| CIMT       | V299-14_1 | 100 | 3 | 42,3  |
| CIMT       | V299-15_1 | 100 | 1 | 20,3  |
| CIMT       | V299-15_2 | 100 | 1 | 15,9  |
| CIMT       | V299-16_1 | 100 | 1 | 10,1  |
| CIMT       | V299-16_2 | 100 | 1 | 10,1  |
| CIMT       | V299-17_1 | 100 | 9 | 126,3 |
| CIMT       | V299-17_2 | 100 | 2 | 20,6  |
| CIMT       | V300-16_1 | 100 | 2 | 24,6  |
| CIMT       | V300-18_1 | 100 | 4 | 36,4  |
| CIMT       | V300-18_2 | 100 | 2 | 25,3  |
| CIMT       | V300-20_1 | 100 | 2 | 35,1  |
| CIMT       | V300-22_1 | 100 | 1 | 10,5  |
| CIMT       | V300-23_1 | 100 | 2 | 22,5  |
| CIMT       | V300-23_2 | 100 | 4 | 49,1  |
| CIMT       | V309-15_1 | 100 | 1 | 11,7  |
| CIMT       | V309-15_2 | 100 | 5 | 56,6  |
| CIMT       | V309-16_1 | 100 | 4 | 76,7  |
| CIMT       | V309-16_2 | 100 | 2 | 36    |
| CIMT       | V309-16_3 | 100 | 6 | 96,8  |
| CIMT       | V309-17_1 | 100 | 3 | 49,6  |
| CIMT       | V309-17_2 | 100 | 3 | 46    |
| CIMT+G-CSF | V213-13_1 | 100 | 3 | 37,3  |
| CIMT+G-CSF | V213-16_1 | 100 | 1 | 12,4  |
| CIMT+G-CSF | V213-17_1 | 100 | 1 | 34,2  |
| CIMT+G-CSF | V213-17_2 | 100 | 3 | 132,3 |
| CIMT+G-CSF | V213-18_1 | 100 | 4 | 83,2  |
| CIMT+G-CSF | V213-18_2 | 100 | 2 | 22    |
| CIMT+G-CSF | V213-19_1 | 100 | 1 | 19,5  |
| CIMT+G-CSF | V213-19_2 | 100 | 2 | 28,2  |
| CIMT+G-CSF | V213-20_1 | 100 | 1 | 19,3  |
| CIMT+G-CSF | V213-22_1 | 100 | 2 | 29,2  |
| CIMT+G-CSF | V213-23_1 | 100 | 1 | 10,2  |

|            |           |     |   |      |
|------------|-----------|-----|---|------|
| CIMT+G-CSF | V214-14_1 | 100 | 2 | 32   |
| CIMT+G-CSF | V214-17_1 | 100 | 3 | 38,3 |
| CIMT+G-CSF | V214-18_1 | 100 | 2 | 36,1 |
| CIMT+G-CSF | V214-19_1 | 100 | 2 | 37,6 |
| CIMT+G-CSF | V214-19_2 | 100 | 4 | 58,8 |
| CIMT+G-CSF | V214-20_1 | 100 | 3 | 79,9 |
| CIMT+G-CSF | V214-21_1 | 100 | 2 | 27,2 |
| CIMT+G-CSF | V217-1_1  | 100 | 1 | 10,3 |
| CIMT+G-CSF | V217-4_1  | 100 | 0 | 0,9  |
| CIMT+G-CSF | V217-6_1  | 100 | 3 | 41,9 |
| CIMT+G-CSF | V217-6_3  | 100 | 3 | 46,6 |
| CIMT+G-CSF | V217-8_1  | 100 | 2 | 26,7 |
| CIMT+G-CSF | V217-8_4  | 100 | 2 | 50,6 |
| CIMT+G-CSF | V217-10_1 | 100 | 1 | 14,1 |
| CIMT+G-CSF | V217-11_1 | 100 | 1 | 15,5 |
| CIMT+G-CSF | V304-17_1 | 100 | 1 | 16,9 |
| CIMT+G-CSF | V304-17_2 | 100 | 1 | 12,1 |
| CIMT+G-CSF | V304-17_3 | 100 | 3 | 32   |
| CIMT+G-CSF | V304-17_4 | 100 | 1 | 12   |
| CIMT+G-CSF | V304-19_1 | 100 | 2 | 23,4 |
| CIMT+G-CSF | V304-19_2 | 100 | 1 | 11,1 |
| CIMT+G-CSF | V305-17_1 | 100 | 1 | 10,6 |
| CIMT+G-CSF | V305-17_2 | 100 | 1 | 52,8 |
| CIMT+G-CSF | V305-17_3 | 100 | 1 | 10,7 |
| CIMT+G-CSF | V305-18_1 | 100 | 1 | 11,2 |
| CIMT+G-CSF | V305-18_2 | 100 | 2 | 56,2 |
| CIMT+G-CSF | V305-18_3 | 100 | 2 | 40,2 |
| CIMT+G-CSF | V305-18_4 | 100 | 1 | 19,9 |
| CIMT+G-CSF | V305-19_1 | 100 | 1 | 13,2 |
| CIMT/G-CSF | V306-16_1 | 100 | 4 | 47,6 |
| CIMT/G-CSF | V306-16_2 | 100 | 2 | 23,2 |
| CIMT/G-CSF | V306-17_1 | 100 | 7 | 95,6 |
| CIMT/G-CSF | V306-17_2 | 100 | 1 | 11,3 |
| CIMT/G-CSF | V306-17_3 | 100 | 3 | 46,4 |
| CIMT/G-CSF | V306-17_4 | 100 | 3 | 31,9 |
| CIMT/G-CSF | V306-17_5 | 100 | 2 | 20,8 |
| CIMT/G-CSF | V311-16_1 | 100 | 7 | 94,4 |
| CIMT/G-CSF | V311-17_1 | 100 | 4 | 75,1 |
| CIMT/G-CSF | V311-17_2 | 100 | 1 | 30,9 |
| CIMT/G-CSF | V311-19_1 | 100 | 1 | 20   |
| CIMT/G-CSF | V311-20_1 | 100 | 4 | 57,4 |
| CIMT/G-CSF | V311-20_2 | 100 | 1 | 21,5 |
| CIMT/G-CSF | V311-20_3 | 100 | 2 | 20,3 |
| CIMT/G-CSF | V313-14_1 | 100 | 5 | 84   |
| CIMT/G-CSF | V313-15_1 | 100 | 1 | 46,9 |
| CIMT/G-CSF | V313-15_2 | 100 | 1 | 10,4 |
| CIMT/G-CSF | V313-17_1 | 100 | 1 | 10   |
| CIMT/G-CSF | V313-17_2 | 100 | 2 | 21,9 |
| CIMT/G-CSF | V313-17_3 | 100 | 3 | 34,7 |
| CIMT/G-CSF | V313-19_1 | 100 | 2 | 44,6 |
| CIMT/G-CSF | V314-16_1 | 100 | 6 | 67,5 |
| CIMT/G-CSF | V314-16_2 | 100 | 4 | 86,8 |
| CIMT/G-CSF | V314-17_1 | 100 | 1 | 22,2 |
| CIMT/G-CSF | V314-17_2 | 100 | 6 | 85,1 |
| CIMT/G-CSF | V314-17_3 | 100 | 3 | 46,6 |
| CIMT/G-CSF | V314-18_1 | 100 | 2 | 33,2 |

|            |           |     |   |       |
|------------|-----------|-----|---|-------|
| CIMT/G-CSF | V314-18_2 | 100 | 2 | 25,7  |
| CIMT/G-CSF | V315-11_1 | 100 | 2 | 24,2  |
| CIMT/G-CSF | V315-11_2 | 100 | 1 | 10,1  |
| CIMT/G-CSF | V315-13_1 | 100 | 2 | 22,2  |
| CIMT/G-CSF | V315-13_2 | 100 | 7 | 125,4 |
| CIMT/G-CSF | V315-14_1 | 100 | 1 | 10,4  |
| CIMT/G-CSF | V315-14_2 | 100 | 3 | 31,2  |
| CIMT/G-CSF | V315-14_3 | 100 | 3 | 29,1  |
| G-CSF      | V220-9_1  | 100 | 2 | 45,5  |
| G-CSF      | V220-11_1 | 100 | 1 | 10,2  |
| G-CSF      | V220-12_1 | 100 | 3 | 37    |
| G-CSF      | V220-16_2 | 100 | 2 | 24    |
| G-CSF      | V220-17_1 | 100 | 4 | 71,3  |
| G-CSF      | V220-18_1 | 100 | 3 | 53,2  |
| G-CSF      | V221-5_1  | 100 | 1 | 14,6  |
| G-CSF      | V221-6_1  | 100 | 6 | 108,4 |
| G-CSF      | V221-7_1  | 100 | 4 | 41,9  |
| G-CSF      | V221-7_2  | 100 | 8 | 91,2  |
| G-CSF      | V221-11_1 | 100 | 3 | 36,1  |
| G-CSF      | V221-13_1 | 100 | 6 | 100,4 |
| G-CSF      | V221-15_1 | 100 | 2 | 22,6  |
| G-CSF      | V221-20_1 | 100 | 1 | 43,6  |
| G-CSF      | V222-19_1 | 100 | 2 | 22,1  |
| G-CSF      | V222-19_2 | 100 | 2 | 35,3  |
| G-CSF      | V222-20_1 | 100 | 4 | 49,7  |
| G-CSF      | V222-20_2 | 100 | 1 | 11,1  |
| G-CSF      | V222-21_1 | 100 | 2 | 24,1  |
| G-CSF      | V222-22_1 | 100 | 6 | 109,1 |
| G-CSF      | V222-22_2 | 100 | 1 | 12,8  |
| G-CSF      | V222-23_1 | 100 | 4 | 77,8  |
| G-CSF      | V222-24_1 | 100 | 2 | 32,8  |
| G-CSF      | V301-18_1 | 100 | 2 | 31,3  |
| G-CSF      | V301-18_2 | 100 | 2 | 29,8  |
| G-CSF      | V301-18_3 | 100 | 1 | 17,3  |
| G-CSF      | V301-19_1 | 100 | 4 | 49,5  |
| G-CSF      | V301-19_2 | 100 | 2 | 29,5  |
| G-CSF      | V301-20_1 | 100 | 4 | 51,2  |
| G-CSF      | V301-20_2 | 100 | 4 | 47,1  |
| G-CSF      | V302-15_1 | 100 | 3 | 51,1  |
| G-CSF      | V302-15_2 | 100 | 1 | 13,6  |
| G-CSF      | V302-15_3 | 100 | 5 | 56,7  |
| G-CSF      | V302-16_1 | 100 | 4 | 49,8  |
| G-CSF      | V302-16_2 | 100 | 1 | 11,5  |
| G-CSF      | V302-16_3 | 100 | 1 | 11,4  |
| G-CSF      | V302-16_4 | 100 | 2 | 28,7  |
| G-CSF      | V302-17_1 | 100 | 1 | 11,2  |
| G-CSF      | V302-17_2 | 100 | 4 | 47,7  |
| G-CSF      | V302-17_3 | 100 | 3 | 36    |
| G-CSF      | V303-15_1 | 100 | 1 | 10,6  |
| G-CSF      | V303-15_2 | 100 | 4 | 57,1  |
| G-CSF      | V303-15_3 | 100 | 2 | 21,9  |
| G-CSF      | V303-16_1 | 100 | 3 | 34,4  |
| G-CSF      | V303-16_2 | 100 | 1 | 17,7  |
| G-CSF      | V303-16_3 | 100 | 2 | 31,2  |
| G-CSF      | V303-17_1 | 100 | 5 | 56    |

apical dendrite Sholl 110 $\mu$ m

| Group   | number    | Radius( $\mu$ m) | Intersections | Length( $\mu$ m) |
|---------|-----------|------------------|---------------|------------------|
| Control | V215-11_1 | 110              | 2             | 30,5             |
| Control | V215-12_1 | 110              | 2             | 32               |
| Control | V215-12_2 | 110              | 1             | 21,8             |
| Control | V215-13_1 | 110              | 3             | 32,6             |
| Control | V215-15_1 | 110              | 2             | 35,1             |
| Control | V215-15_2 | 110              | 5             | 76,3             |
| Control | V215-16_1 | 110              | 2             | 22,2             |
| Control | V215-18_1 | 110              | 1             | 16,2             |
| Control | V216-11_1 | 110              | 3             | 55,3             |
| Control | V216-12_1 | 110              | 2             | 28               |
| Control | V216-13_1 | 110              | 1             | 10,9             |
| Control | V216-14_1 | 110              | 2             | 26,7             |
| Control | V216-14_2 | 110              | 2             | 29,6             |
| Control | V216-16_1 | 110              | 1             | 14               |
| Control | V216-16_2 | 110              | 3             | 86,7             |
| Control | V216-17_1 | 110              | 2             | 28,8             |
| Control | V216-18_1 | 110              | 1             | 13,2             |
| Control | V216-18_2 | 110              | 2             | 24,5             |
| Control | V219-6_1  | 110              | 2             | 24,3             |
| Control | V219-11_1 | 110              | 1             | 19               |
| Control | V219-12_1 | 110              | 3             | 36,8             |
| Control | V219-13_1 | 110              | 2             | 40,5             |
| Control | V219-13_2 | 110              | 1             | 15               |
| Control | V219-14_1 | 110              | 2             | 60,8             |
| Control | V219-14_2 | 110              | 4             | 42,2             |
| Control | V219-16_1 | 110              | 2             | 16,3             |
| Control | V297-19_1 | 110              | 3             | 72               |
| Control | V297-19_2 | 110              | 1             | 10,3             |
| Control | V297-20_1 | 110              | 2             | 26               |
| Control | V297-20_2 | 110              | 1             | 11,1             |
| Control | V297-20_3 | 110              | 3             | 27,2             |
| Control | V297-22_1 | 110              | 5             | 63,2             |
| Control | V297-22_2 | 110              | 1             | 11,2             |
| Control | V298-15_1 | 110              | 6             | 90,9             |
| Control | V298-16_1 | 110              | 5             | 62,1             |
| Control | V298-16_2 | 110              | 3             | 35,6             |
| Control | V298-16_3 | 110              | 1             | 10,2             |
| Control | V298-17_1 | 110              | 1             | 11,5             |
| Control | V298-17_2 | 110              | 3             | 35,9             |
| Control | V298-17_3 | 110              | 2             | 28,1             |
| Control | V308-17_1 | 110              | 1             | 11,5             |
| Control | V308-17_2 | 110              | 2             | 23,1             |
| Control | V308-17_3 | 110              | 2             | 23,3             |
| Control | V308-17_4 | 110              | 1             | 10,6             |
| Control | V308-18_1 | 110              | 1             | 22,8             |
| Control | V308-18_2 | 110              | 2             | 35,3             |
| Control | V308-18_3 | 110              | 11            | 145,1            |
| CIMT    | V211-10_1 | 110              | 7             | 89,2             |
| CIMT    | V211-10_2 | 110              | 2             | 34               |
| CIMT    | V211-11_1 | 110              | 3             | 82,7             |
| CIMT    | V211-11_2 | 110              | 3             | 38,4             |
| CIMT    | V211-12_1 | 110              | 2             | 31,4             |



|            |           |     |    |      |
|------------|-----------|-----|----|------|
| CIMT       | V211-13_1 | 110 | 3  | 38,7 |
| CIMT       | V211-13_2 | 110 | 5  | 71,4 |
| CIMT       | V211-15_1 | 110 | 1  | 14   |
| CIMT       | V211-15_2 | 110 | 1  | 12   |
| CIMT       | V211-16_1 | 110 | 5  | 77   |
| CIMT       | V212-14_1 | 110 | 4  | 53,3 |
| CIMT       | V212-14_2 | 110 | 6  | 88,5 |
| CIMT       | V212-15_1 | 110 | 7  | 80,9 |
| CIMT       | V212-18_1 | 110 | 4  | 63,8 |
| CIMT       | V212-21_1 | 110 | 2  | 24,4 |
| CIMT       | V212-21_2 | 110 | 4  | 55,6 |
| CIMT       | V212-22_1 | 110 | 3  | 36,8 |
| CIMT       | V212-23_1 | 110 | 5  | 53,3 |
| CIMT       | V212-23_2 | 110 | 3  | 33,7 |
| CIMT       | V212-24_1 | 110 | 4  | 46,3 |
| CIMT       | V218-9_1  | 110 | 1  | 22,6 |
| CIMT       | V218-10_1 | 110 | 1  | 12,6 |
| CIMT       | V218-11_1 | 110 | 1  | 10,3 |
| CIMT       | V218-12_1 | 110 | 2  | 58,5 |
| CIMT       | V218-12_2 | 110 | 2  | 23   |
| CIMT       | V218-15_1 | 110 | 2  | 25   |
| CIMT       | V218-17_1 | 110 | 6  | 94,3 |
| CIMT       | V299-14_1 | 110 | 3  | 34,4 |
| CIMT       | V299-15_1 | 110 | 1  | 22,1 |
| CIMT       | V299-15_2 | 110 | 2  | 22,7 |
| CIMT       | V299-16_1 | 110 | 1  | 10   |
| CIMT       | V299-16_2 | 110 | 1  | 11,6 |
| CIMT       | V299-17_1 | 110 | 10 | 115  |
| CIMT       | V299-17_2 | 110 | 1  | 17,5 |
| CIMT       | V300-16_1 | 110 | 2  | 21,3 |
| CIMT       | V300-18_1 | 110 | 4  | 74,2 |
| CIMT       | V300-18_2 | 110 | 3  | 40,1 |
| CIMT       | V300-20_1 | 110 | 2  | 28,6 |
| CIMT       | V300-22_1 | 110 | 3  | 18,1 |
| CIMT       | V300-23_1 | 110 | 2  | 21   |
| CIMT       | V300-23_2 | 110 | 4  | 49   |
| CIMT       | V309-15_1 | 110 | 1  | 10,8 |
| CIMT       | V309-15_2 | 110 | 6  | 57,9 |
| CIMT       | V309-16_1 | 110 | 5  | 65,1 |
| CIMT       | V309-16_2 | 110 | 1  | 29,4 |
| CIMT       | V309-16_3 | 110 | 6  | 82,4 |
| CIMT       | V309-17_1 | 110 | 3  | 34,5 |
| CIMT       | V309-17_2 | 110 | 3  | 50,2 |
| CIMT+G-CSF | V213-13_1 | 110 | 3  | 33,5 |
| CIMT+G-CSF | V213-16_1 | 110 | 1  | 14   |
| CIMT+G-CSF | V213-17_1 | 110 | 1  | 10,3 |
| CIMT+G-CSF | V213-17_2 | 110 | 3  | 38   |
| CIMT+G-CSF | V213-18_1 | 110 | 5  | 99,4 |
| CIMT+G-CSF | V213-18_2 | 110 | 2  | 22,7 |
| CIMT+G-CSF | V213-19_1 | 110 | 2  | 27,6 |
| CIMT+G-CSF | V213-19_2 | 110 | 3  | 49,1 |
| CIMT+G-CSF | V213-20_1 | 110 | 1  | 10,2 |
| CIMT+G-CSF | V213-22_1 | 110 | 2  | 38,4 |
| CIMT+G-CSF | V213-23_1 | 110 | 1  | 10,1 |
| CIMT+G-CSF | V214-14_1 | 110 | 1  | 24,7 |
| CIMT+G-CSF | V214-17_1 | 110 | 3  | 36   |

|            |           |     |   |      |
|------------|-----------|-----|---|------|
| CIMT+G-CSF | V214-18_1 | 110 | 3 | 33,6 |
| CIMT+G-CSF | V214-19_1 | 110 | 2 | 40,7 |
| CIMT+G-CSF | V214-19_2 | 110 | 6 | 70,2 |
| CIMT+G-CSF | V214-20_1 | 110 | 4 | 47,8 |
| CIMT+G-CSF | V214-21_1 | 110 | 2 | 27   |
| CIMT+G-CSF | V217-1_1  | 110 | 1 | 11,7 |
| CIMT+G-CSF | V217-6_1  | 110 | 3 | 60,6 |
| CIMT+G-CSF | V217-6_3  | 110 | 3 | 41,1 |
| CIMT+G-CSF | V217-8_1  | 110 | 2 | 24,5 |
| CIMT+G-CSF | V217-8_4  | 110 | 2 | 23,6 |
| CIMT+G-CSF | V217-10_1 | 110 | 1 | 21,9 |
| CIMT+G-CSF | V217-11_1 | 110 | 1 | 10,2 |
| CIMT+G-CSF | V304-17_1 | 110 | 1 | 14,9 |
| CIMT+G-CSF | V304-17_2 | 110 | 1 | 11,2 |
| CIMT+G-CSF | V304-17_3 | 110 | 2 | 23,1 |
| CIMT+G-CSF | V304-17_4 | 110 | 1 | 10,7 |
| CIMT+G-CSF | V304-19_1 | 110 | 2 | 23,9 |
| CIMT+G-CSF | V304-19_2 | 110 | 0 | 3,9  |
| CIMT+G-CSF | V305-17_1 | 110 | 4 | 27,6 |
| CIMT+G-CSF | V305-17_2 | 110 | 1 | 11,4 |
| CIMT+G-CSF | V305-17_3 | 110 | 2 | 12,6 |
| CIMT+G-CSF | V305-18_1 | 110 | 1 | 11,4 |
| CIMT+G-CSF | V305-18_2 | 110 | 2 | 20,7 |
| CIMT+G-CSF | V305-18_3 | 110 | 1 | 37,8 |
| CIMT+G-CSF | V305-18_4 | 110 | 1 | 10,5 |
| CIMT+G-CSF | V305-19_1 | 110 | 1 | 15,3 |
| CIMT/G-CSF | V306-16_1 | 110 | 4 | 46,6 |
| CIMT/G-CSF | V306-16_2 | 110 | 2 | 26,3 |
| CIMT/G-CSF | V306-17_1 | 110 | 7 | 94,9 |
| CIMT/G-CSF | V306-17_2 | 110 | 1 | 10,6 |
| CIMT/G-CSF | V306-17_3 | 110 | 4 | 40,7 |
| CIMT/G-CSF | V306-17_4 | 110 | 3 | 45,9 |
| CIMT/G-CSF | V306-17_5 | 110 | 1 | 20   |
| CIMT/G-CSF | V311-16_1 | 110 | 6 | 97,5 |
| CIMT/G-CSF | V311-17_1 | 110 | 4 | 51,9 |
| CIMT/G-CSF | V311-17_2 | 110 | 2 | 46,9 |
| CIMT/G-CSF | V311-19_1 | 110 | 1 | 10,7 |
| CIMT/G-CSF | V311-20_1 | 110 | 4 | 48,3 |
| CIMT/G-CSF | V311-20_2 | 110 | 2 | 31,8 |
| CIMT/G-CSF | V311-20_3 | 110 | 2 | 21,7 |
| CIMT/G-CSF | V313-14_1 | 110 | 4 | 55,3 |
| CIMT/G-CSF | V313-15_1 | 110 | 0 | 7,8  |
| CIMT/G-CSF | V313-15_2 | 110 | 1 | 10,5 |
| CIMT/G-CSF | V313-17_1 | 110 | 1 | 10   |
| CIMT/G-CSF | V313-17_2 | 110 | 2 | 21,4 |
| CIMT/G-CSF | V313-17_3 | 110 | 4 | 35,1 |
| CIMT/G-CSF | V313-19_1 | 110 | 1 | 19,4 |
| CIMT/G-CSF | V314-16_1 | 110 | 4 | 75,8 |
| CIMT/G-CSF | V314-16_2 | 110 | 2 | 35,7 |
| CIMT/G-CSF | V314-17_1 | 110 | 4 | 58,5 |
| CIMT/G-CSF | V314-17_2 | 110 | 3 | 56,7 |
| CIMT/G-CSF | V314-17_3 | 110 | 3 | 44,4 |
| CIMT/G-CSF | V314-18_1 | 110 | 1 | 15,1 |
| CIMT/G-CSF | V314-18_2 | 110 | 1 | 20,4 |
| CIMT/G-CSF | V315-11_1 | 110 | 1 | 15,1 |
| CIMT/G-CSF | V315-11_2 | 110 | 1 | 10,8 |

|            |           |     |    |       |
|------------|-----------|-----|----|-------|
| CIMT/G-CSF | V315-13_1 | 110 | 3  | 87,8  |
| CIMT/G-CSF | V315-13_2 | 110 | 5  | 84,9  |
| CIMT/G-CSF | V315-14_1 | 110 | 0  | 5,1   |
| CIMT/G-CSF | V315-14_2 | 110 | 2  | 27,8  |
| CIMT/G-CSF | V315-14_3 | 110 | 3  | 37,2  |
| G-CSF      | V220-9_1  | 110 | 5  | 32    |
| G-CSF      | V220-11_1 | 110 | 1  | 11,6  |
| G-CSF      | V220-12_1 | 110 | 3  | 46,7  |
| G-CSF      | V220-16_2 | 110 | 2  | 28,6  |
| G-CSF      | V220-17_1 | 110 | 3  | 52,2  |
| G-CSF      | V220-18_1 | 110 | 2  | 54,2  |
| G-CSF      | V221-5_1  | 110 | 0  | 9     |
| G-CSF      | V221-6_1  | 110 | 4  | 74,8  |
| G-CSF      | V221-7_1  | 110 | 2  | 38,1  |
| G-CSF      | V221-7_2  | 110 | 8  | 116,5 |
| G-CSF      | V221-11_1 | 110 | 3  | 36,6  |
| G-CSF      | V221-13_1 | 110 | 10 | 122,3 |
| G-CSF      | V221-15_1 | 110 | 3  | 30,6  |
| G-CSF      | V221-20_1 | 110 | 0  | 5     |
| G-CSF      | V222-19_1 | 110 | 2  | 24,1  |
| G-CSF      | V222-19_2 | 110 | 2  | 33,4  |
| G-CSF      | V222-20_1 | 110 | 3  | 49,9  |
| G-CSF      | V222-20_2 | 110 | 1  | 10,7  |
| G-CSF      | V222-21_1 | 110 | 3  | 37,2  |
| G-CSF      | V222-22_1 | 110 | 5  | 148,5 |
| G-CSF      | V222-22_2 | 110 | 1  | 10,2  |
| G-CSF      | V222-23_1 | 110 | 4  | 67,2  |
| G-CSF      | V222-24_1 | 110 | 2  | 24,3  |
| G-CSF      | V301-18_1 | 110 | 1  | 12,4  |
| G-CSF      | V301-18_2 | 110 | 2  | 31,9  |
| G-CSF      | V301-18_3 | 110 | 1  | 10,6  |
| G-CSF      | V301-19_1 | 110 | 3  | 57    |
| G-CSF      | V301-19_2 | 110 | 1  | 24,4  |
| G-CSF      | V301-20_1 | 110 | 3  | 91,7  |
| G-CSF      | V301-20_2 | 110 | 5  | 70,3  |
| G-CSF      | V302-15_1 | 110 | 3  | 51,9  |
| G-CSF      | V302-15_2 | 110 | 1  | 15,3  |
| G-CSF      | V302-15_3 | 110 | 5  | 115,2 |
| G-CSF      | V302-16_1 | 110 | 2  | 33,1  |
| G-CSF      | V302-16_2 | 110 | 1  | 13,4  |
| G-CSF      | V302-16_3 | 110 | 1  | 14,4  |
| G-CSF      | V302-16_4 | 110 | 2  | 25    |
| G-CSF      | V302-17_1 | 110 | 1  | 10,5  |
| G-CSF      | V302-17_2 | 110 | 5  | 90    |
| G-CSF      | V302-17_3 | 110 | 2  | 35,2  |
| G-CSF      | V303-15_1 | 110 | 1  | 11,8  |
| G-CSF      | V303-15_2 | 110 | 5  | 69,1  |
| G-CSF      | V303-15_3 | 110 | 2  | 21,5  |
| G-CSF      | V303-16_1 | 110 | 3  | 32,9  |
| G-CSF      | V303-16_2 | 110 | 1  | 10,5  |
| G-CSF      | V303-16_3 | 110 | 2  | 32,3  |
| G-CSF      | V303-17_1 | 110 | 7  | 104   |

apical dendrite Sholl 120 $\mu$ m

| Group   | number    | Radius( $\mu$ m) | Intersections | Length( $\mu$ m) |
|---------|-----------|------------------|---------------|------------------|
| Control | V215-11_1 | 120              | 0             | 21,6             |
| Control | V215-12_1 | 120              | 1             | 29,8             |
| Control | V215-12_2 | 120              | 1             | 10,8             |
| Control | V215-13_1 | 120              | 1             | 24,3             |
| Control | V215-15_1 | 120              | 2             | 23,5             |
| Control | V215-15_2 | 120              | 5             | 75,9             |
| Control | V215-16_1 | 120              | 2             | 23,7             |
| Control | V215-18_1 | 120              | 1             | 11,3             |
| Control | V216-11_1 | 120              | 3             | 41,1             |
| Control | V216-12_1 | 120              | 1             | 22,7             |
| Control | V216-13_1 | 120              | 1             | 12,8             |
| Control | V216-14_1 | 120              | 3             | 37,5             |
| Control | V216-14_2 | 120              | 1             | 35,4             |
| Control | V216-16_1 | 120              | 1             | 11,6             |
| Control | V216-16_2 | 120              | 2             | 43               |
| Control | V216-17_1 | 120              | 1             | 21,8             |
| Control | V216-18_1 | 120              | 1             | 10,6             |
| Control | V216-18_2 | 120              | 3             | 27,1             |
| Control | V219-6_1  | 120              | 2             | 23,7             |
| Control | V219-11_1 | 120              | 0             | 0                |
| Control | V219-12_1 | 120              | 2             | 27               |
| Control | V219-13_1 | 120              | 1             | 22,8             |
| Control | V219-13_2 | 120              | 1             | 10,4             |
| Control | V219-14_1 | 120              | 4             | 73,2             |
| Control | V219-14_2 | 120              | 6             | 107,1            |
| Control | V219-16_1 | 120              | 1             | 21,5             |
| Control | V297-19_1 | 120              | 4             | 70,8             |
| Control | V297-19_2 | 120              | 1             | 10,5             |
| Control | V297-20_1 | 120              | 1             | 10,6             |
| Control | V297-20_2 | 120              | 1             | 13,3             |
| Control | V297-20_3 | 120              | 3             | 40,7             |
| Control | V297-22_1 | 120              | 5             | 50,7             |
| Control | V297-22_2 | 120              | 1             | 10,4             |
| Control | V298-15_1 | 120              | 4             | 60,6             |
| Control | V298-16_1 | 120              | 2             | 42,1             |
| Control | V298-16_2 | 120              | 3             | 36,7             |
| Control | V298-16_3 | 120              | 1             | 10,9             |
| Control | V298-17_1 | 120              | 1             | 10,4             |
| Control | V298-17_2 | 120              | 3             | 38,6             |
| Control | V298-17_3 | 120              | 1             | 10,3             |
| Control | V308-17_1 | 120              | 1             | 10,5             |
| Control | V308-17_2 | 120              | 2             | 27,6             |
| Control | V308-17_3 | 120              | 2             | 24               |
| Control | V308-17_4 | 120              | 4             | 33,7             |
| Control | V308-18_1 | 120              | 1             | 18,9             |
| Control | V308-18_2 | 120              | 2             | 24,7             |
| Control | V308-18_3 | 120              | 11            | 151,2            |
| CIMT    | V211-10_1 | 120              | 7             | 179              |
| CIMT    | V211-10_2 | 120              | 2             | 23,4             |
| CIMT    | V211-11_1 | 120              | 3             | 41,5             |
| CIMT    | V211-11_2 | 120              | 3             | 48,9             |
| CIMT    | V211-12_1 | 120              | 3             | 34,4             |
| CIMT    | V211-13_1 | 120              | 3             | 39,7             |

|            |           |     |   |       |
|------------|-----------|-----|---|-------|
| CIMT       | V211-13_2 | 120 | 5 | 72    |
| CIMT       | V211-15_1 | 120 | 2 | 51,2  |
| CIMT       | V211-15_2 | 120 | 1 | 10,6  |
| CIMT       | V211-16_1 | 120 | 3 | 50,4  |
| CIMT       | V212-14_1 | 120 | 3 | 40,8  |
| CIMT       | V212-14_2 | 120 | 6 | 89,1  |
| CIMT       | V212-15_1 | 120 | 7 | 82,8  |
| CIMT       | V212-18_1 | 120 | 4 | 57,7  |
| CIMT       | V212-21_1 | 120 | 2 | 36    |
| CIMT       | V212-21_2 | 120 | 4 | 49,6  |
| CIMT       | V212-22_1 | 120 | 3 | 33,6  |
| CIMT       | V212-23_1 | 120 | 5 | 71    |
| CIMT       | V212-23_2 | 120 | 4 | 40,5  |
| CIMT       | V212-24_1 | 120 | 4 | 45    |
| CIMT       | V218-9_1  | 120 | 1 | 13,9  |
| CIMT       | V218-10_1 | 120 | 1 | 15,1  |
| CIMT       | V218-11_1 | 120 | 2 | 21,3  |
| CIMT       | V218-12_1 | 120 | 2 | 24,6  |
| CIMT       | V218-12_2 | 120 | 2 | 21,6  |
| CIMT       | V218-15_1 | 120 | 2 | 24,5  |
| CIMT       | V218-17_1 | 120 | 5 | 68,1  |
| CIMT       | V299-14_1 | 120 | 2 | 31,1  |
| CIMT       | V299-15_1 | 120 | 1 | 17,1  |
| CIMT       | V299-15_2 | 120 | 2 | 23,7  |
| CIMT       | V299-16_1 | 120 | 1 | 13,9  |
| CIMT       | V299-16_2 | 120 | 1 | 10,6  |
| CIMT       | V299-17_1 | 120 | 9 | 109,4 |
| CIMT       | V299-17_2 | 120 | 1 | 10,8  |
| CIMT       | V300-16_1 | 120 | 2 | 24    |
| CIMT       | V300-18_1 | 120 | 3 | 45,3  |
| CIMT       | V300-18_2 | 120 | 2 | 53    |
| CIMT       | V300-20_1 | 120 | 3 | 32,9  |
| CIMT       | V300-22_1 | 120 | 3 | 43,7  |
| CIMT       | V300-23_1 | 120 | 2 | 20,6  |
| CIMT       | V300-23_2 | 120 | 3 | 34,3  |
| CIMT       | V309-15_1 | 120 | 2 | 14,4  |
| CIMT       | V309-15_2 | 120 | 5 | 76,7  |
| CIMT       | V309-16_1 | 120 | 3 | 74,9  |
| CIMT       | V309-16_2 | 120 | 2 | 44,6  |
| CIMT       | V309-16_3 | 120 | 6 | 95,2  |
| CIMT       | V309-17_1 | 120 | 1 | 47,3  |
| CIMT       | V309-17_2 | 120 | 2 | 32,1  |
| CIMT+G-CSF | V213-13_1 | 120 | 4 | 35,9  |
| CIMT+G-CSF | V213-16_1 | 120 | 1 | 10,8  |
| CIMT+G-CSF | V213-17_1 | 120 | 1 | 11,1  |
| CIMT+G-CSF | V213-17_2 | 120 | 3 | 40,2  |
| CIMT+G-CSF | V213-18_1 | 120 | 3 | 39,2  |
| CIMT+G-CSF | V213-18_2 | 120 | 2 | 21,4  |
| CIMT+G-CSF | V213-19_1 | 120 | 2 | 39,5  |
| CIMT+G-CSF | V213-19_2 | 120 | 1 | 31,2  |
| CIMT+G-CSF | V213-20_1 | 120 | 2 | 12,1  |
| CIMT+G-CSF | V213-22_1 | 120 | 2 | 37,7  |
| CIMT+G-CSF | V213-23_1 | 120 | 0 | 7     |
| CIMT+G-CSF | V214-14_1 | 120 | 1 | 11,7  |
| CIMT+G-CSF | V214-17_1 | 120 | 2 | 31,8  |
| CIMT+G-CSF | V214-18_1 | 120 | 3 | 33    |

|            |           |     |   |      |
|------------|-----------|-----|---|------|
| CIMT+G-CSF | V214-19_1 | 120 | 2 | 20,5 |
| CIMT+G-CSF | V214-19_2 | 120 | 4 | 78,5 |
| CIMT+G-CSF | V214-20_1 | 120 | 2 | 49,3 |
| CIMT+G-CSF | V214-21_1 | 120 | 2 | 23,3 |
| CIMT+G-CSF | V217-1_1  | 120 | 1 | 12,3 |
| CIMT+G-CSF | V217-6_1  | 120 | 5 | 84,7 |
| CIMT+G-CSF | V217-6_3  | 120 | 3 | 41,6 |
| CIMT+G-CSF | V217-8_1  | 120 | 1 | 19,2 |
| CIMT+G-CSF | V217-8_4  | 120 | 2 | 39,1 |
| CIMT+G-CSF | V217-10_1 | 120 | 1 | 13,4 |
| CIMT+G-CSF | V217-11_1 | 120 | 1 | 10,5 |
| CIMT+G-CSF | V304-17_1 | 120 | 1 | 10,5 |
| CIMT+G-CSF | V304-17_2 | 120 | 1 | 11,1 |
| CIMT+G-CSF | V304-17_3 | 120 | 2 | 22,1 |
| CIMT+G-CSF | V304-17_4 | 120 | 1 | 11,6 |
| CIMT+G-CSF | V304-19_1 | 120 | 2 | 23,1 |
| CIMT+G-CSF | V305-17_1 | 120 | 2 | 39,6 |
| CIMT+G-CSF | V305-17_2 | 120 | 1 | 14   |
| CIMT+G-CSF | V305-17_3 | 120 | 3 | 58,2 |
| CIMT+G-CSF | V305-18_1 | 120 | 0 | 2,6  |
| CIMT+G-CSF | V305-18_2 | 120 | 1 | 13,4 |
| CIMT+G-CSF | V305-18_3 | 120 | 1 | 14,2 |
| CIMT+G-CSF | V305-18_4 | 120 | 1 | 12,3 |
| CIMT+G-CSF | V305-19_1 | 120 | 1 | 11,8 |
| CIMT/G-CSF | V306-16_1 | 120 | 4 | 51,9 |
| CIMT/G-CSF | V306-16_2 | 120 | 1 | 22,3 |
| CIMT/G-CSF | V306-17_1 | 120 | 6 | 75,4 |
| CIMT/G-CSF | V306-17_2 | 120 | 2 | 22   |
| CIMT/G-CSF | V306-17_3 | 120 | 3 | 75,6 |
| CIMT/G-CSF | V306-17_4 | 120 | 3 | 36,8 |
| CIMT/G-CSF | V306-17_5 | 120 | 1 | 10,7 |
| CIMT/G-CSF | V311-16_1 | 120 | 6 | 86,8 |
| CIMT/G-CSF | V311-17_1 | 120 | 3 | 53,1 |
| CIMT/G-CSF | V311-17_2 | 120 | 2 | 34   |
| CIMT/G-CSF | V311-19_1 | 120 | 1 | 10,4 |
| CIMT/G-CSF | V311-20_1 | 120 | 4 | 46,6 |
| CIMT/G-CSF | V311-20_2 | 120 | 0 | 5,8  |
| CIMT/G-CSF | V311-20_3 | 120 | 2 | 26,5 |
| CIMT/G-CSF | V313-14_1 | 120 | 3 | 38,2 |
| CIMT/G-CSF | V313-15_2 | 120 | 1 | 10,5 |
| CIMT/G-CSF | V313-17_1 | 120 | 1 | 10   |
| CIMT/G-CSF | V313-17_2 | 120 | 1 | 20,9 |
| CIMT/G-CSF | V313-17_3 | 120 | 5 | 63,2 |
| CIMT/G-CSF | V313-19_1 | 120 | 2 | 21,2 |
| CIMT/G-CSF | V314-16_1 | 120 | 2 | 37,1 |
| CIMT/G-CSF | V314-16_2 | 120 | 1 | 23,1 |
| CIMT/G-CSF | V314-17_1 | 120 | 3 | 62,6 |
| CIMT/G-CSF | V314-17_2 | 120 | 3 | 33   |
| CIMT/G-CSF | V314-17_3 | 120 | 2 | 37,9 |
| CIMT/G-CSF | V314-18_1 | 120 | 1 | 10,5 |
| CIMT/G-CSF | V314-18_2 | 120 | 1 | 10,1 |
| CIMT/G-CSF | V315-11_1 | 120 | 1 | 10,5 |
| CIMT/G-CSF | V315-11_2 | 120 | 1 | 13,2 |
| CIMT/G-CSF | V315-13_1 | 120 | 2 | 77,4 |
| CIMT/G-CSF | V315-13_2 | 120 | 2 | 53,3 |
| CIMT/G-CSF | V315-14_2 | 120 | 2 | 20,9 |

|            |           |     |    |       |
|------------|-----------|-----|----|-------|
| CIMT/G-CSF | V315-14_3 | 120 | 2  | 32,7  |
| G-CSF      | V220-9_1  | 120 | 4  | 122,1 |
| G-CSF      | V220-11_1 | 120 | 1  | 10,2  |
| G-CSF      | V220-12_1 | 120 | 3  | 54    |
| G-CSF      | V220-16_2 | 120 | 2  | 22,8  |
| G-CSF      | V220-17_1 | 120 | 3  | 44,1  |
| G-CSF      | V220-18_1 | 120 | 2  | 31    |
| G-CSF      | V221-6_1  | 120 | 5  | 60,9  |
| G-CSF      | V221-7_1  | 120 | 2  | 23,5  |
| G-CSF      | V221-7_2  | 120 | 5  | 97,8  |
| G-CSF      | V221-11_1 | 120 | 3  | 42,4  |
| G-CSF      | V221-13_1 | 120 | 13 | 183,6 |
| G-CSF      | V221-15_1 | 120 | 3  | 40,1  |
| G-CSF      | V222-19_1 | 120 | 2  | 22,5  |
| G-CSF      | V222-19_2 | 120 | 2  | 25,6  |
| G-CSF      | V222-20_1 | 120 | 3  | 46,4  |
| G-CSF      | V222-20_2 | 120 | 1  | 11,3  |
| G-CSF      | V222-21_1 | 120 | 3  | 39,9  |
| G-CSF      | V222-22_1 | 120 | 5  | 84,9  |
| G-CSF      | V222-22_2 | 120 | 2  | 30,2  |
| G-CSF      | V222-23_1 | 120 | 8  | 76,5  |
| G-CSF      | V222-24_1 | 120 | 2  | 26,7  |
| G-CSF      | V301-18_1 | 120 | 1  | 14,3  |
| G-CSF      | V301-18_2 | 120 | 2  | 27    |
| G-CSF      | V301-18_3 | 120 | 1  | 10,3  |
| G-CSF      | V301-19_1 | 120 | 3  | 37,3  |
| G-CSF      | V301-19_2 | 120 | 1  | 12,8  |
| G-CSF      | V301-20_1 | 120 | 3  | 32,5  |
| G-CSF      | V301-20_2 | 120 | 3  | 81,5  |
| G-CSF      | V302-15_1 | 120 | 2  | 44,5  |
| G-CSF      | V302-15_2 | 120 | 1  | 10,3  |
| G-CSF      | V302-15_3 | 120 | 4  | 55    |
| G-CSF      | V302-16_1 | 120 | 2  | 22,2  |
| G-CSF      | V302-16_2 | 120 | 1  | 10,3  |
| G-CSF      | V302-16_3 | 120 | 1  | 10,4  |
| G-CSF      | V302-16_4 | 120 | 1  | 13,3  |
| G-CSF      | V302-17_1 | 120 | 1  | 24,7  |
| G-CSF      | V302-17_2 | 120 | 3  | 151,1 |
| G-CSF      | V302-17_3 | 120 | 2  | 23,2  |
| G-CSF      | V303-15_1 | 120 | 1  | 11,2  |
| G-CSF      | V303-15_2 | 120 | 3  | 61    |
| G-CSF      | V303-15_3 | 120 | 2  | 21    |
| G-CSF      | V303-16_1 | 120 | 3  | 31,9  |
| G-CSF      | V303-16_2 | 120 | 1  | 10,8  |
| G-CSF      | V303-16_3 | 120 | 2  | 28,2  |
| G-CSF      | V303-17_1 | 120 | 5  | 145   |

apical dendrite Sholl 130 $\mu$ m

| Group   | number    | Radius( $\mu$ m) | Intersections | Length( $\mu$ m) |
|---------|-----------|------------------|---------------|------------------|
| Control | V215-12_1 | 130              | 2             | 32,6             |
| Control | V215-12_2 | 130              | 0             | 3,8              |
| Control | V215-13_1 | 130              | 0             | 1,5              |
| Control | V215-15_1 | 130              | 2             | 21,5             |
| Control | V215-15_2 | 130              | 5             | 64,1             |
| Control | V215-16_1 | 130              | 1             | 25,1             |
| Control | V215-18_1 | 130              | 1             | 10,6             |
| Control | V216-11_1 | 130              | 3             | 35,7             |
| Control | V216-12_1 | 130              | 0             | 0,7              |
| Control | V216-13_1 | 130              | 1             | 10,4             |
| Control | V216-14_1 | 130              | 1             | 38,5             |
| Control | V216-14_2 | 130              | 1             | 10,2             |
| Control | V216-16_1 | 130              | 1             | 12,8             |
| Control | V216-16_2 | 130              | 1             | 20,6             |
| Control | V216-17_1 | 130              | 2             | 17,4             |
| Control | V216-18_1 | 130              | 2             | 20,6             |
| Control | V216-18_2 | 130              | 3             | 36,6             |
| Control | V219-6_1  | 130              | 1             | 36,9             |
| Control | V219-12_1 | 130              | 2             | 22               |
| Control | V219-13_1 | 130              | 1             | 23,9             |
| Control | V219-13_2 | 130              | 1             | 10,3             |
| Control | V219-14_1 | 130              | 2             | 44,8             |
| Control | V219-14_2 | 130              | 4             | 64,2             |
| Control | V219-16_1 | 130              | 1             | 10,1             |
| Control | V297-19_1 | 130              | 4             | 53,1             |
| Control | V297-19_2 | 130              | 1             | 11,2             |
| Control | V297-20_1 | 130              | 1             | 10,2             |
| Control | V297-20_2 | 130              | 0             | 2                |
| Control | V297-20_3 | 130              | 2             | 32,5             |
| Control | V297-22_1 | 130              | 4             | 60,8             |
| Control | V297-22_2 | 130              | 1             | 10,2             |
| Control | V298-15_1 | 130              | 4             | 94,8             |
| Control | V298-16_1 | 130              | 4             | 48,9             |
| Control | V298-16_2 | 130              | 2             | 27,5             |
| Control | V298-16_3 | 130              | 1             | 10,1             |
| Control | V298-17_1 | 130              | 1             | 10,3             |
| Control | V298-17_2 | 130              | 3             | 39,1             |
| Control | V298-17_3 | 130              | 1             | 10,3             |
| Control | V308-17_1 | 130              | 1             | 11               |
| Control | V308-17_2 | 130              | 1             | 22,9             |
| Control | V308-17_3 | 130              | 2             | 22,3             |
| Control | V308-17_4 | 130              | 2             | 53,9             |
| Control | V308-18_1 | 130              | 1             | 15,3             |
| Control | V308-18_2 | 130              | 2             | 21,8             |
| Control | V308-18_3 | 130              | 8             | 109,2            |
| CIMT    | V211-10_1 | 130              | 4             | 96,7             |
| CIMT    | V211-10_2 | 130              | 2             | 21,2             |
| CIMT    | V211-11_1 | 130              | 4             | 47,5             |
| CIMT    | V211-11_2 | 130              | 3             | 34,3             |
| CIMT    | V211-12_1 | 130              | 3             | 40,8             |
| CIMT    | V211-13_1 | 130              | 2             | 31,5             |
| CIMT    | V211-13_2 | 130              | 3             | 51,3             |
| CIMT    | V211-15_1 | 130              | 1             | 26,2             |



|            |           |     |   |       |
|------------|-----------|-----|---|-------|
| CIMT       | V211-15_2 | 130 | 1 | 10,3  |
| CIMT       | V211-16_1 | 130 | 2 | 38,8  |
| CIMT       | V212-14_1 | 130 | 2 | 37,7  |
| CIMT       | V212-14_2 | 130 | 6 | 89,9  |
| CIMT       | V212-15_1 | 130 | 6 | 77,2  |
| CIMT       | V212-18_1 | 130 | 3 | 51,6  |
| CIMT       | V212-21_1 | 130 | 2 | 50,9  |
| CIMT       | V212-21_2 | 130 | 4 | 64,6  |
| CIMT       | V212-22_1 | 130 | 4 | 38,4  |
| CIMT       | V212-23_1 | 130 | 2 | 126,9 |
| CIMT       | V212-23_2 | 130 | 3 | 35,5  |
| CIMT       | V212-24_1 | 130 | 3 | 48,1  |
| CIMT       | V218-9_1  | 130 | 1 | 12,1  |
| CIMT       | V218-10_1 | 130 | 1 | 32,7  |
| CIMT       | V218-11_1 | 130 | 2 | 28    |
| CIMT       | V218-12_1 | 130 | 2 | 22,3  |
| CIMT       | V218-12_2 | 130 | 3 | 102,6 |
| CIMT       | V218-15_1 | 130 | 2 | 22,7  |
| CIMT       | V218-17_1 | 130 | 2 | 51,8  |
| CIMT       | V299-14_1 | 130 | 2 | 23,9  |
| CIMT       | V299-15_1 | 130 | 3 | 15,5  |
| CIMT       | V299-15_2 | 130 | 1 | 21,3  |
| CIMT       | V299-16_1 | 130 | 2 | 19,4  |
| CIMT       | V299-16_2 | 130 | 1 | 11,1  |
| CIMT       | V299-17_1 | 130 | 7 | 96,4  |
| CIMT       | V299-17_2 | 130 | 1 | 12,8  |
| CIMT       | V300-16_1 | 130 | 2 | 23,3  |
| CIMT       | V300-18_1 | 130 | 6 | 70,2  |
| CIMT       | V300-18_2 | 130 | 2 | 22,6  |
| CIMT       | V300-20_1 | 130 | 3 | 44    |
| CIMT       | V300-22_1 | 130 | 3 | 37,9  |
| CIMT       | V300-23_1 | 130 | 1 | 16,2  |
| CIMT       | V300-23_2 | 130 | 3 | 48,1  |
| CIMT       | V309-15_1 | 130 | 2 | 40,5  |
| CIMT       | V309-15_2 | 130 | 4 | 59    |
| CIMT       | V309-16_1 | 130 | 2 | 42,8  |
| CIMT       | V309-16_2 | 130 | 1 | 16,4  |
| CIMT       | V309-16_3 | 130 | 4 | 75,6  |
| CIMT       | V309-17_1 | 130 | 1 | 10,3  |
| CIMT       | V309-17_2 | 130 | 2 | 20,8  |
| CIMT+G-CSF | V213-13_1 | 130 | 3 | 34,2  |
| CIMT+G-CSF | V213-16_1 | 130 | 1 | 11,4  |
| CIMT+G-CSF | V213-17_1 | 130 | 1 | 10,3  |
| CIMT+G-CSF | V213-17_2 | 130 | 3 | 39,2  |
| CIMT+G-CSF | V213-18_1 | 130 | 3 | 43,5  |
| CIMT+G-CSF | V213-18_2 | 130 | 2 | 22    |
| CIMT+G-CSF | V213-19_1 | 130 | 2 | 29,8  |
| CIMT+G-CSF | V213-19_2 | 130 | 2 | 18,7  |
| CIMT+G-CSF | V213-20_1 | 130 | 1 | 33,2  |
| CIMT+G-CSF | V213-22_1 | 130 | 1 | 50,8  |
| CIMT+G-CSF | V214-14_1 | 130 | 1 | 11    |
| CIMT+G-CSF | V214-17_1 | 130 | 2 | 26,1  |
| CIMT+G-CSF | V214-18_1 | 130 | 2 | 30,8  |
| CIMT+G-CSF | V214-19_1 | 130 | 2 | 34,6  |
| CIMT+G-CSF | V214-19_2 | 130 | 4 | 55,2  |
| CIMT+G-CSF | V214-20_1 | 130 | 1 | 19,3  |

|            |           |     |   |       |
|------------|-----------|-----|---|-------|
| CIMT+G-CSF | V214-21_1 | 130 | 1 | 20,3  |
| CIMT+G-CSF | V217-1_1  | 130 | 0 | 6,3   |
| CIMT+G-CSF | V217-6_1  | 130 | 5 | 103,2 |
| CIMT+G-CSF | V217-6_3  | 130 | 3 | 38,2  |
| CIMT+G-CSF | V217-8_1  | 130 | 1 | 13,9  |
| CIMT+G-CSF | V217-8_4  | 130 | 2 | 21,7  |
| CIMT+G-CSF | V217-10_1 | 130 | 1 | 10,1  |
| CIMT+G-CSF | V217-11_1 | 130 | 1 | 12,3  |
| CIMT+G-CSF | V304-17_1 | 130 | 1 | 16,7  |
| CIMT+G-CSF | V304-17_2 | 130 | 1 | 10,7  |
| CIMT+G-CSF | V304-17_3 | 130 | 2 | 20,9  |
| CIMT+G-CSF | V304-17_4 | 130 | 2 | 22    |
| CIMT+G-CSF | V304-19_1 | 130 | 2 | 24,9  |
| CIMT+G-CSF | V305-17_1 | 130 | 2 | 30,6  |
| CIMT+G-CSF | V305-17_2 | 130 | 1 | 10,8  |
| CIMT+G-CSF | V305-17_3 | 130 | 0 | 36,9  |
| CIMT+G-CSF | V305-18_2 | 130 | 1 | 10,1  |
| CIMT+G-CSF | V305-18_3 | 130 | 1 | 10,8  |
| CIMT+G-CSF | V305-18_4 | 130 | 1 | 11,5  |
| CIMT+G-CSF | V305-19_1 | 130 | 1 | 10,6  |
| CIMT/G-CSF | V306-16_1 | 130 | 3 | 47,6  |
| CIMT/G-CSF | V306-16_2 | 130 | 1 | 10,6  |
| CIMT/G-CSF | V306-17_1 | 130 | 7 | 76,4  |
| CIMT/G-CSF | V306-17_2 | 130 | 2 | 26,1  |
| CIMT/G-CSF | V306-17_3 | 130 | 3 | 46,6  |
| CIMT/G-CSF | V306-17_4 | 130 | 3 | 36,3  |
| CIMT/G-CSF | V306-17_5 | 130 | 1 | 11,3  |
| CIMT/G-CSF | V311-16_1 | 130 | 6 | 90    |
| CIMT/G-CSF | V311-17_1 | 130 | 4 | 54,5  |
| CIMT/G-CSF | V311-17_2 | 130 | 2 | 37,3  |
| CIMT/G-CSF | V311-19_1 | 130 | 1 | 10,7  |
| CIMT/G-CSF | V311-20_1 | 130 | 4 | 45,7  |
| CIMT/G-CSF | V311-20_3 | 130 | 2 | 21,4  |
| CIMT/G-CSF | V313-14_1 | 130 | 3 | 42,4  |
| CIMT/G-CSF | V313-15_2 | 130 | 1 | 10,5  |
| CIMT/G-CSF | V313-17_1 | 130 | 1 | 10,1  |
| CIMT/G-CSF | V313-17_2 | 130 | 0 | 0,8   |
| CIMT/G-CSF | V313-17_3 | 130 | 2 | 48,2  |
| CIMT/G-CSF | V313-19_1 | 130 | 2 | 96,8  |
| CIMT/G-CSF | V314-16_1 | 130 | 1 | 24,3  |
| CIMT/G-CSF | V314-16_2 | 130 | 0 | 8,1   |
| CIMT/G-CSF | V314-17_1 | 130 | 2 | 56,3  |
| CIMT/G-CSF | V314-17_2 | 130 | 2 | 38,7  |
| CIMT/G-CSF | V314-17_3 | 130 | 2 | 20,8  |
| CIMT/G-CSF | V314-18_1 | 130 | 1 | 10,5  |
| CIMT/G-CSF | V314-18_2 | 130 | 1 | 12,8  |
| CIMT/G-CSF | V315-11_1 | 130 | 1 | 10,2  |
| CIMT/G-CSF | V315-11_2 | 130 | 1 | 11,8  |
| CIMT/G-CSF | V315-13_1 | 130 | 3 | 45,7  |
| CIMT/G-CSF | V315-13_2 | 130 | 2 | 24,4  |
| CIMT/G-CSF | V315-14_2 | 130 | 1 | 20,3  |
| CIMT/G-CSF | V315-14_3 | 130 | 2 | 23,9  |
| G-CSF      | V220-9_1  | 130 | 3 | 43,4  |
| G-CSF      | V220-11_1 | 130 | 1 | 12,8  |
| G-CSF      | V220-12_1 | 130 | 3 | 39,3  |
| G-CSF      | V220-16_2 | 130 | 1 | 20,7  |

|       |           |     |   |       |
|-------|-----------|-----|---|-------|
| G-CSF | V220-17_1 | 130 | 1 | 21,6  |
| G-CSF | V220-18_1 | 130 | 2 | 23,1  |
| G-CSF | V221-6_1  | 130 | 4 | 46,7  |
| G-CSF | V221-7_1  | 130 | 1 | 22,5  |
| G-CSF | V221-7_2  | 130 | 5 | 56,3  |
| G-CSF | V221-11_1 | 130 | 3 | 32,6  |
| G-CSF | V221-13_1 | 130 | 8 | 188   |
| G-CSF | V221-15_1 | 130 | 3 | 36,1  |
| G-CSF | V222-19_1 | 130 | 2 | 14,1  |
| G-CSF | V222-19_2 | 130 | 2 | 23,3  |
| G-CSF | V222-20_1 | 130 | 3 | 40,5  |
| G-CSF | V222-20_2 | 130 | 0 | 8,7   |
| G-CSF | V222-21_1 | 130 | 3 | 33,3  |
| G-CSF | V222-22_1 | 130 | 6 | 76,1  |
| G-CSF | V222-22_2 | 130 | 2 | 29,7  |
| G-CSF | V222-23_1 | 130 | 6 | 156,4 |
| G-CSF | V222-24_1 | 130 | 4 | 55,4  |
| G-CSF | V301-18_1 | 130 | 3 | 22,5  |
| G-CSF | V301-18_2 | 130 | 2 | 32    |
| G-CSF | V301-18_3 | 130 | 1 | 10,6  |
| G-CSF | V301-19_1 | 130 | 2 | 40,1  |
| G-CSF | V301-19_2 | 130 | 1 | 11,4  |
| G-CSF | V301-20_1 | 130 | 3 | 35    |
| G-CSF | V301-20_2 | 130 | 3 | 34,5  |
| G-CSF | V302-15_1 | 130 | 1 | 19,4  |
| G-CSF | V302-15_2 | 130 | 1 | 10,6  |
| G-CSF | V302-15_3 | 130 | 3 | 37,7  |
| G-CSF | V302-16_1 | 130 | 2 | 21,2  |
| G-CSF | V302-16_2 | 130 | 1 | 10,9  |
| G-CSF | V302-16_3 | 130 | 1 | 10,4  |
| G-CSF | V302-16_4 | 130 | 4 | 68,7  |
| G-CSF | V302-17_1 | 130 | 1 | 10,4  |
| G-CSF | V302-17_2 | 130 | 2 | 41,3  |
| G-CSF | V302-17_3 | 130 | 1 | 12,9  |
| G-CSF | V303-15_1 | 130 | 1 | 10,9  |
| G-CSF | V303-15_2 | 130 | 2 | 43,6  |
| G-CSF | V303-15_3 | 130 | 2 | 21,2  |
| G-CSF | V303-16_1 | 130 | 3 | 33,4  |
| G-CSF | V303-16_2 | 130 | 1 | 10,2  |
| G-CSF | V303-16_3 | 130 | 1 | 32,6  |
| G-CSF | V303-17_1 | 130 | 5 | 65,3  |

apical dendrite Sholl 140 $\mu$ m

| Group   | number    | Radius( $\mu$ m) | Intersections | Length( $\mu$ m) |
|---------|-----------|------------------|---------------|------------------|
| Control | V215-12_1 | 140              | 2             | 31,4             |
| Control | V215-15_1 | 140              | 3             | 46,6             |
| Control | V215-15_2 | 140              | 2             | 72,7             |
| Control | V215-16_1 | 140              | 1             | 10,3             |
| Control | V215-18_1 | 140              | 0             | 0,8              |
| Control | V216-11_1 | 140              | 4             | 41,8             |
| Control | V216-13_1 | 140              | 1             | 10,3             |
| Control | V216-14_1 | 140              | 1             | 10,6             |
| Control | V216-14_2 | 140              | 1             | 10,8             |
| Control | V216-16_1 | 140              | 1             | 11               |
| Control | V216-16_2 | 140              | 1             | 10,4             |
| Control | V216-17_1 | 140              | 2             | 42,2             |
| Control | V216-18_1 | 140              | 1             | 23,6             |
| Control | V216-18_2 | 140              | 3             | 34,2             |
| Control | V219-6_1  | 140              | 1             | 11,2             |
| Control | V219-12_1 | 140              | 4             | 125              |
| Control | V219-13_1 | 140              | 1             | 10,5             |
| Control | V219-13_2 | 140              | 1             | 10,4             |
| Control | V219-14_1 | 140              | 2             | 24,6             |
| Control | V219-14_2 | 140              | 2             | 68,5             |
| Control | V219-16_1 | 140              | 1             | 10,5             |
| Control | V297-19_1 | 140              | 3             | 40,4             |
| Control | V297-19_2 | 140              | 1             | 10,6             |
| Control | V297-20_1 | 140              | 1             | 10,5             |
| Control | V297-20_3 | 140              | 1             | 31,1             |
| Control | V297-22_1 | 140              | 3             | 45,4             |
| Control | V297-22_2 | 140              | 1             | 10,3             |
| Control | V298-15_1 | 140              | 2             | 31,1             |
| Control | V298-16_1 | 140              | 2             | 45,7             |
| Control | V298-16_2 | 140              | 1             | 17,5             |
| Control | V298-16_3 | 140              | 1             | 13,1             |
| Control | V298-17_1 | 140              | 2             | 28               |
| Control | V298-17_2 | 140              | 3             | 41               |
| Control | V298-17_3 | 140              | 2             | 14,6             |
| Control | V308-17_1 | 140              | 1             | 11               |
| Control | V308-17_2 | 140              | 1             | 14,9             |
| Control | V308-17_3 | 140              | 1             | 10,9             |
| Control | V308-17_4 | 140              | 1             | 35,2             |
| Control | V308-18_1 | 140              | 1             | 10,6             |
| Control | V308-18_2 | 140              | 2             | 22,2             |
| Control | V308-18_3 | 140              | 6             | 95,4             |
| CIMT    | V211-10_1 | 140              | 3             | 41,4             |
| CIMT    | V211-10_2 | 140              | 1             | 21,7             |
| CIMT    | V211-11_1 | 140              | 4             | 75,2             |
| CIMT    | V211-11_2 | 140              | 2             | 46,6             |
| CIMT    | V211-12_1 | 140              | 3             | 42,7             |
| CIMT    | V211-13_1 | 140              | 1             | 24,9             |
| CIMT    | V211-13_2 | 140              | 5             | 45,5             |
| CIMT    | V211-15_1 | 140              | 1             | 11               |
| CIMT    | V211-15_2 | 140              | 2             | 22,7             |
| CIMT    | V211-16_1 | 140              | 1             | 17,9             |
| CIMT    | V212-14_1 | 140              | 2             | 46,7             |
| CIMT    | V212-14_2 | 140              | 5             | 79,2             |

|            |           |     |   |       |
|------------|-----------|-----|---|-------|
| CIMT       | V212-15_1 | 140 | 5 | 68,3  |
| CIMT       | V212-18_1 | 140 | 3 | 37    |
| CIMT       | V212-21_1 | 140 | 1 | 23,7  |
| CIMT       | V212-21_2 | 140 | 5 | 59,8  |
| CIMT       | V212-22_1 | 140 | 4 | 47,3  |
| CIMT       | V212-23_1 | 140 | 2 | 24,6  |
| CIMT       | V212-23_2 | 140 | 3 | 31,5  |
| CIMT       | V212-24_1 | 140 | 3 | 33,4  |
| CIMT       | V218-9_1  | 140 | 1 | 10,7  |
| CIMT       | V218-10_1 | 140 | 1 | 20,5  |
| CIMT       | V218-11_1 | 140 | 1 | 38,9  |
| CIMT       | V218-12_1 | 140 | 1 | 14,4  |
| CIMT       | V218-12_2 | 140 | 3 | 43,3  |
| CIMT       | V218-15_1 | 140 | 3 | 37,5  |
| CIMT       | V218-17_1 | 140 | 1 | 13,6  |
| CIMT       | V299-14_1 | 140 | 2 | 23,4  |
| CIMT       | V299-15_1 | 140 | 2 | 87,4  |
| CIMT       | V299-15_2 | 140 | 1 | 12,9  |
| CIMT       | V299-16_1 | 140 | 2 | 21,4  |
| CIMT       | V299-16_2 | 140 | 2 | 15    |
| CIMT       | V299-17_1 | 140 | 5 | 56,9  |
| CIMT       | V299-17_2 | 140 | 1 | 11    |
| CIMT       | V300-16_1 | 140 | 2 | 22,5  |
| CIMT       | V300-18_1 | 140 | 3 | 62,2  |
| CIMT       | V300-18_2 | 140 | 1 | 15,1  |
| CIMT       | V300-20_1 | 140 | 2 | 41,2  |
| CIMT       | V300-22_1 | 140 | 1 | 29,4  |
| CIMT       | V300-23_1 | 140 | 1 | 10,3  |
| CIMT       | V300-23_2 | 140 | 2 | 57,8  |
| CIMT       | V309-15_1 | 140 | 2 | 64,9  |
| CIMT       | V309-15_2 | 140 | 4 | 55    |
| CIMT       | V309-16_1 | 140 | 4 | 157,7 |
| CIMT       | V309-16_2 | 140 | 1 | 10,4  |
| CIMT       | V309-16_3 | 140 | 3 | 39,3  |
| CIMT       | V309-17_1 | 140 | 1 | 10,5  |
| CIMT       | V309-17_2 | 140 | 2 | 21,1  |
| CIMT+G-CSF | V213-13_1 | 140 | 2 | 26,6  |
| CIMT+G-CSF | V213-16_1 | 140 | 1 | 10,6  |
| CIMT+G-CSF | V213-17_1 | 140 | 1 | 10,2  |
| CIMT+G-CSF | V213-17_2 | 140 | 2 | 30,3  |
| CIMT+G-CSF | V213-18_1 | 140 | 2 | 45,9  |
| CIMT+G-CSF | V213-18_2 | 140 | 2 | 21,9  |
| CIMT+G-CSF | V213-19_1 | 140 | 2 | 29,4  |
| CIMT+G-CSF | V213-19_2 | 140 | 4 | 45,7  |
| CIMT+G-CSF | V213-20_1 | 140 | 1 | 11    |
| CIMT+G-CSF | V213-22_1 | 140 | 1 | 10,2  |
| CIMT+G-CSF | V214-14_1 | 140 | 1 | 10,9  |
| CIMT+G-CSF | V214-17_1 | 140 | 2 | 24,5  |
| CIMT+G-CSF | V214-18_1 | 140 | 2 | 22,7  |
| CIMT+G-CSF | V214-19_1 | 140 | 2 | 23    |
| CIMT+G-CSF | V214-19_2 | 140 | 3 | 45,7  |
| CIMT+G-CSF | V214-20_1 | 140 | 1 | 10,9  |
| CIMT+G-CSF | V214-21_1 | 140 | 1 | 10,4  |
| CIMT+G-CSF | V217-6_1  | 140 | 4 | 79,1  |
| CIMT+G-CSF | V217-6_3  | 140 | 3 | 33,5  |
| CIMT+G-CSF | V217-8_1  | 140 | 2 | 14,2  |

|            |           |     |    |       |
|------------|-----------|-----|----|-------|
| CIMT+G-CSF | V217-8_4  | 140 | 2  | 20,6  |
| CIMT+G-CSF | V217-10_1 | 140 | 1  | 12,7  |
| CIMT+G-CSF | V217-11_1 | 140 | 1  | 12,8  |
| CIMT+G-CSF | V304-17_1 | 140 | 1  | 12    |
| CIMT+G-CSF | V304-17_2 | 140 | 1  | 11,2  |
| CIMT+G-CSF | V304-17_3 | 140 | 0  | 11,9  |
| CIMT+G-CSF | V304-17_4 | 140 | 2  | 31,6  |
| CIMT+G-CSF | V304-19_1 | 140 | 1  | 19,1  |
| CIMT+G-CSF | V305-17_1 | 140 | 2  | 24,2  |
| CIMT+G-CSF | V305-17_2 | 140 | 1  | 12,2  |
| CIMT+G-CSF | V305-18_2 | 140 | 1  | 11,2  |
| CIMT+G-CSF | V305-18_3 | 140 | 1  | 10,2  |
| CIMT+G-CSF | V305-18_4 | 140 | 1  | 10,3  |
| CIMT+G-CSF | V305-19_1 | 140 | 1  | 11,3  |
| CIMT/G-CSF | V306-16_1 | 140 | 3  | 35,1  |
| CIMT/G-CSF | V306-16_2 | 140 | 1  | 11,3  |
| CIMT/G-CSF | V306-17_1 | 140 | 7  | 85    |
| CIMT/G-CSF | V306-17_2 | 140 | 2  | 26,4  |
| CIMT/G-CSF | V306-17_3 | 140 | 2  | 23,3  |
| CIMT/G-CSF | V306-17_4 | 140 | 3  | 45,3  |
| CIMT/G-CSF | V306-17_5 | 140 | 1  | 10,4  |
| CIMT/G-CSF | V311-16_1 | 140 | 10 | 113,3 |
| CIMT/G-CSF | V311-17_1 | 140 | 5  | 98,5  |
| CIMT/G-CSF | V311-17_2 | 140 | 1  | 29,9  |
| CIMT/G-CSF | V311-19_1 | 140 | 4  | 98,1  |
| CIMT/G-CSF | V311-20_1 | 140 | 3  | 36,7  |
| CIMT/G-CSF | V311-20_3 | 140 | 2  | 20,6  |
| CIMT/G-CSF | V313-14_1 | 140 | 3  | 47    |
| CIMT/G-CSF | V313-15_2 | 140 | 0  | 40,9  |
| CIMT/G-CSF | V313-17_1 | 140 | 1  | 10,3  |
| CIMT/G-CSF | V313-17_3 | 140 | 1  | 16,5  |
| CIMT/G-CSF | V313-19_1 | 140 | 1  | 25,1  |
| CIMT/G-CSF | V314-16_1 | 140 | 1  | 12,3  |
| CIMT/G-CSF | V314-17_1 | 140 | 1  | 43,6  |
| CIMT/G-CSF | V314-17_2 | 140 | 2  | 28,9  |
| CIMT/G-CSF | V314-17_3 | 140 | 2  | 34,2  |
| CIMT/G-CSF | V314-18_1 | 140 | 1  | 11,1  |
| CIMT/G-CSF | V314-18_2 | 140 | 0  | 5,3   |
| CIMT/G-CSF | V315-11_1 | 140 | 1  | 13,9  |
| CIMT/G-CSF | V315-11_2 | 140 | 1  | 10,1  |
| CIMT/G-CSF | V315-13_1 | 140 | 3  | 56,2  |
| CIMT/G-CSF | V315-13_2 | 140 | 3  | 38,1  |
| CIMT/G-CSF | V315-14_2 | 140 | 1  | 10,7  |
| CIMT/G-CSF | V315-14_3 | 140 | 1  | 20,8  |
| G-CSF      | V220-9_1  | 140 | 3  | 35,2  |
| G-CSF      | V220-11_1 | 140 | 1  | 12,8  |
| G-CSF      | V220-12_1 | 140 | 3  | 39,5  |
| G-CSF      | V220-16_2 | 140 | 1  | 31,9  |
| G-CSF      | V220-17_1 | 140 | 0  | 1,9   |
| G-CSF      | V220-18_1 | 140 | 2  | 24,2  |
| G-CSF      | V221-6_1  | 140 | 5  | 54,2  |
| G-CSF      | V221-7_1  | 140 | 0  | 8,6   |
| G-CSF      | V221-7_2  | 140 | 4  | 57,2  |
| G-CSF      | V221-11_1 | 140 | 3  | 36,3  |
| G-CSF      | V221-13_1 | 140 | 7  | 92,8  |
| G-CSF      | V221-15_1 | 140 | 2  | 45,6  |

|       |           |     |   |      |
|-------|-----------|-----|---|------|
| G-CSF | V222-19_1 | 140 | 2 | 24,1 |
| G-CSF | V222-19_2 | 140 | 2 | 20,7 |
| G-CSF | V222-20_1 | 140 | 5 | 41,2 |
| G-CSF | V222-21_1 | 140 | 3 | 34,4 |
| G-CSF | V222-22_1 | 140 | 5 | 76,9 |
| G-CSF | V222-22_2 | 140 | 3 | 47,9 |
| G-CSF | V222-23_1 | 140 | 5 | 76,6 |
| G-CSF | V222-24_1 | 140 | 4 | 46,6 |
| G-CSF | V301-18_1 | 140 | 1 | 31,3 |
| G-CSF | V301-18_2 | 140 | 1 | 12   |
| G-CSF | V301-18_3 | 140 | 1 | 11,9 |
| G-CSF | V301-19_1 | 140 | 3 | 34,1 |
| G-CSF | V301-19_2 | 140 | 1 | 11,4 |
| G-CSF | V301-20_1 | 140 | 3 | 36,6 |
| G-CSF | V301-20_2 | 140 | 2 | 26,7 |
| G-CSF | V302-15_1 | 140 | 1 | 10,7 |
| G-CSF | V302-15_2 | 140 | 1 | 10,9 |
| G-CSF | V302-15_3 | 140 | 3 | 38,5 |
| G-CSF | V302-16_1 | 140 | 2 | 23,3 |
| G-CSF | V302-16_2 | 140 | 1 | 11,2 |
| G-CSF | V302-16_3 | 140 | 1 | 10,3 |
| G-CSF | V302-16_4 | 140 | 1 | 29,8 |
| G-CSF | V302-17_1 | 140 | 1 | 11,3 |
| G-CSF | V302-17_2 | 140 | 2 | 23,2 |
| G-CSF | V302-17_3 | 140 | 1 | 10,9 |
| G-CSF | V303-15_1 | 140 | 2 | 38,8 |
| G-CSF | V303-15_2 | 140 | 1 | 19,5 |
| G-CSF | V303-15_3 | 140 | 1 | 18,5 |
| G-CSF | V303-16_1 | 140 | 2 | 50,1 |
| G-CSF | V303-16_2 | 140 | 1 | 12,2 |
| G-CSF | V303-16_3 | 140 | 1 | 11,2 |
| G-CSF | V303-17_1 | 140 | 5 | 58,3 |

apical dendrite Sholl 150 $\mu$ m

| Group   | number    | Radius( $\mu$ m) | Intersections | Length( $\mu$ m) |
|---------|-----------|------------------|---------------|------------------|
| Control | V215-12_1 | 150              | 2             | 24,6             |
| Control | V215-15_1 | 150              | 6             | 43,1             |
| Control | V215-15_2 | 150              | 4             | 54,1             |
| Control | V215-16_1 | 150              | 1             | 11,5             |
| Control | V216-11_1 | 150              | 3             | 35,1             |
| Control | V216-13_1 | 150              | 0             | 8,5              |
| Control | V216-14_1 | 150              | 1             | 10,1             |
| Control | V216-14_2 | 150              | 1             | 12,6             |
| Control | V216-16_1 | 150              | 0             | 9,9              |
| Control | V216-16_2 | 150              | 1             | 10,2             |
| Control | V216-17_1 | 150              | 2             | 21,7             |
| Control | V216-18_1 | 150              | 1             | 26,3             |
| Control | V216-18_2 | 150              | 2             | 29,6             |
| Control | V219-6_1  | 150              | 1             | 10,8             |
| Control | V219-12_1 | 150              | 2             | 67,2             |
| Control | V219-13_1 | 150              | 1             | 10,9             |
| Control | V219-13_2 | 150              | 1             | 11,5             |
| Control | V219-14_1 | 150              | 2             | 23,7             |
| Control | V219-14_2 | 150              | 3             | 31,3             |
| Control | V219-16_1 | 150              | 1             | 10,2             |
| Control | V297-19_1 | 150              | 2             | 42,1             |
| Control | V297-19_2 | 150              | 1             | 12,9             |
| Control | V297-20_1 | 150              | 1             | 10,8             |
| Control | V297-20_3 | 150              | 1             | 13,6             |
| Control | V297-22_1 | 150              | 3             | 38,3             |
| Control | V297-22_2 | 150              | 0             | 9,6              |
| Control | V298-15_1 | 150              | 3             | 24,8             |
| Control | V298-16_1 | 150              | 2             | 43,3             |
| Control | V298-16_2 | 150              | 1             | 12               |
| Control | V298-16_3 | 150              | 3             | 65,7             |
| Control | V298-17_1 | 150              | 1             | 16,9             |
| Control | V298-17_2 | 150              | 3             | 59,8             |
| Control | V298-17_3 | 150              | 2             | 22,8             |
| Control | V308-17_1 | 150              | 1             | 15,7             |
| Control | V308-17_2 | 150              | 1             | 10,7             |
| Control | V308-17_3 | 150              | 3             | 26,9             |
| Control | V308-17_4 | 150              | 1             | 12               |
| Control | V308-18_1 | 150              | 1             | 10,6             |
| Control | V308-18_2 | 150              | 0             | 9                |
| Control | V308-18_3 | 150              | 3             | 69,3             |
| CIMT    | V211-10_1 | 150              | 2             | 49,4             |
| CIMT    | V211-10_2 | 150              | 0             | 8,9              |
| CIMT    | V211-11_1 | 150              | 5             | 78,9             |
| CIMT    | V211-11_2 | 150              | 2             | 23,7             |
| CIMT    | V211-12_1 | 150              | 2             | 25               |
| CIMT    | V211-13_1 | 150              | 2             | 26,1             |
| CIMT    | V211-13_2 | 150              | 5             | 76,9             |
| CIMT    | V211-15_1 | 150              | 1             | 11,5             |
| CIMT    | V211-15_2 | 150              | 4             | 35,5             |
| CIMT    | V211-16_1 | 150              | 1             | 10,5             |
| CIMT    | V212-14_1 | 150              | 2             | 34,3             |
| CIMT    | V212-14_2 | 150              | 6             | 58,2             |
| CIMT    | V212-15_1 | 150              | 4             | 65,3             |



|            |           |     |   |      |
|------------|-----------|-----|---|------|
| CIMT       | V212-18_1 | 150 | 2 | 29,5 |
| CIMT       | V212-21_1 | 150 | 1 | 24,9 |
| CIMT       | V212-21_2 | 150 | 5 | 61,6 |
| CIMT       | V212-22_1 | 150 | 3 | 42,2 |
| CIMT       | V212-23_1 | 150 | 2 | 31,8 |
| CIMT       | V212-23_2 | 150 | 3 | 32,5 |
| CIMT       | V212-24_1 | 150 | 3 | 31,8 |
| CIMT       | V218-9_1  | 150 | 1 | 10,8 |
| CIMT       | V218-10_1 | 150 | 1 | 18,3 |
| CIMT       | V218-11_1 | 150 | 1 | 11,3 |
| CIMT       | V218-12_1 | 150 | 1 | 11,3 |
| CIMT       | V218-12_2 | 150 | 3 | 46   |
| CIMT       | V218-15_1 | 150 | 3 | 37,2 |
| CIMT       | V218-17_1 | 150 | 1 | 12,9 |
| CIMT       | V299-14_1 | 150 | 2 | 21,9 |
| CIMT       | V299-15_1 | 150 | 2 | 37,9 |
| CIMT       | V299-15_2 | 150 | 1 | 10,7 |
| CIMT       | V299-16_1 | 150 | 2 | 33,3 |
| CIMT       | V299-16_2 | 150 | 1 | 21,7 |
| CIMT       | V299-17_1 | 150 | 5 | 56,8 |
| CIMT       | V299-17_2 | 150 | 1 | 10   |
| CIMT       | V300-16_1 | 150 | 2 | 20,5 |
| CIMT       | V300-18_1 | 150 | 2 | 26,3 |
| CIMT       | V300-18_2 | 150 | 0 | 3,3  |
| CIMT       | V300-20_1 | 150 | 2 | 25,8 |
| CIMT       | V300-22_1 | 150 | 2 | 18,3 |
| CIMT       | V300-23_1 | 150 | 1 | 10,8 |
| CIMT       | V300-23_2 | 150 | 2 | 24,3 |
| CIMT       | V309-15_1 | 150 | 1 | 21,9 |
| CIMT       | V309-15_2 | 150 | 3 | 89,5 |
| CIMT       | V309-16_1 | 150 | 1 | 32,6 |
| CIMT       | V309-16_2 | 150 | 2 | 71,3 |
| CIMT       | V309-16_3 | 150 | 4 | 44,8 |
| CIMT       | V309-17_1 | 150 | 2 | 15,8 |
| CIMT       | V309-17_2 | 150 | 1 | 17,9 |
| CIMT+G-CSF | V213-13_1 | 150 | 1 | 20,3 |
| CIMT+G-CSF | V213-16_1 | 150 | 1 | 10,7 |
| CIMT+G-CSF | V213-17_1 | 150 | 1 | 10,2 |
| CIMT+G-CSF | V213-17_2 | 150 | 2 | 22,3 |
| CIMT+G-CSF | V213-18_1 | 150 | 2 | 28,8 |
| CIMT+G-CSF | V213-18_2 | 150 | 2 | 21,3 |
| CIMT+G-CSF | V213-19_1 | 150 | 2 | 39,7 |
| CIMT+G-CSF | V213-19_2 | 150 | 2 | 31,3 |
| CIMT+G-CSF | V213-20_1 | 150 | 1 | 10,1 |
| CIMT+G-CSF | V213-22_1 | 150 | 1 | 10,1 |
| CIMT+G-CSF | V214-14_1 | 150 | 1 | 11,3 |
| CIMT+G-CSF | V214-17_1 | 150 | 2 | 21,5 |
| CIMT+G-CSF | V214-18_1 | 150 | 2 | 27,3 |
| CIMT+G-CSF | V214-19_1 | 150 | 1 | 15,1 |
| CIMT+G-CSF | V214-19_2 | 150 | 4 | 45,2 |
| CIMT+G-CSF | V214-20_1 | 150 | 1 | 10,2 |
| CIMT+G-CSF | V214-21_1 | 150 | 1 | 10,9 |
| CIMT+G-CSF | V217-6_1  | 150 | 2 | 35,8 |
| CIMT+G-CSF | V217-6_3  | 150 | 2 | 35,5 |
| CIMT+G-CSF | V217-8_1  | 150 | 2 | 66,3 |
| CIMT+G-CSF | V217-8_4  | 150 | 2 | 29,3 |

|            |           |     |   |       |
|------------|-----------|-----|---|-------|
| CIMT+G-CSF | V217-10_1 | 150 | 1 | 12,1  |
| CIMT+G-CSF | V217-11_1 | 150 | 1 | 11,6  |
| CIMT+G-CSF | V304-17_1 | 150 | 0 | 7     |
| CIMT+G-CSF | V304-17_2 | 150 | 1 | 11,5  |
| CIMT+G-CSF | V304-17_4 | 150 | 2 | 40,4  |
| CIMT+G-CSF | V304-19_1 | 150 | 1 | 11    |
| CIMT+G-CSF | V305-17_1 | 150 | 2 | 31    |
| CIMT+G-CSF | V305-17_2 | 150 | 1 | 12,1  |
| CIMT+G-CSF | V305-18_2 | 150 | 1 | 11,3  |
| CIMT+G-CSF | V305-18_3 | 150 | 1 | 13,3  |
| CIMT+G-CSF | V305-18_4 | 150 | 1 | 10,4  |
| CIMT+G-CSF | V305-19_1 | 150 | 1 | 11,9  |
| CIMT/G-CSF | V306-16_1 | 150 | 3 | 35    |
| CIMT/G-CSF | V306-16_2 | 150 | 1 | 11,5  |
| CIMT/G-CSF | V306-17_1 | 150 | 5 | 87,6  |
| CIMT/G-CSF | V306-17_2 | 150 | 2 | 26,1  |
| CIMT/G-CSF | V306-17_3 | 150 | 1 | 18,9  |
| CIMT/G-CSF | V306-17_4 | 150 | 2 | 25,4  |
| CIMT/G-CSF | V306-17_5 | 150 | 1 | 10,3  |
| CIMT/G-CSF | V311-16_1 | 150 | 5 | 66,2  |
| CIMT/G-CSF | V311-17_1 | 150 | 5 | 96,1  |
| CIMT/G-CSF | V311-17_2 | 150 | 1 | 15,9  |
| CIMT/G-CSF | V311-19_1 | 150 | 6 | 118,9 |
| CIMT/G-CSF | V311-20_1 | 150 | 2 | 56,3  |
| CIMT/G-CSF | V311-20_3 | 150 | 2 | 20,4  |
| CIMT/G-CSF | V313-14_1 | 150 | 2 | 39,9  |
| CIMT/G-CSF | V313-17_1 | 150 | 1 | 10,2  |
| CIMT/G-CSF | V313-17_3 | 150 | 1 | 11,7  |
| CIMT/G-CSF | V313-19_1 | 150 | 1 | 10,2  |
| CIMT/G-CSF | V314-16_1 | 150 | 0 | 5,8   |
| CIMT/G-CSF | V314-17_1 | 150 | 1 | 11,5  |
| CIMT/G-CSF | V314-17_2 | 150 | 3 | 43,9  |
| CIMT/G-CSF | V314-17_3 | 150 | 2 | 35,1  |
| CIMT/G-CSF | V314-18_1 | 150 | 2 | 23    |
| CIMT/G-CSF | V315-11_1 | 150 | 1 | 10,2  |
| CIMT/G-CSF | V315-11_2 | 150 | 5 | 58,2  |
| CIMT/G-CSF | V315-13_1 | 150 | 3 | 45,3  |
| CIMT/G-CSF | V315-13_2 | 150 | 1 | 50,4  |
| CIMT/G-CSF | V315-14_2 | 150 | 1 | 15,5  |
| CIMT/G-CSF | V315-14_3 | 150 | 1 | 10,4  |
| G-CSF      | V220-9_1  | 150 | 3 | 34    |
| G-CSF      | V220-11_1 | 150 | 1 | 11,3  |
| G-CSF      | V220-12_1 | 150 | 3 | 50,6  |
| G-CSF      | V220-16_2 | 150 | 1 | 11,5  |
| G-CSF      | V220-18_1 | 150 | 2 | 28,5  |
| G-CSF      | V221-6_1  | 150 | 6 | 82    |
| G-CSF      | V221-7_2  | 150 | 4 | 44,2  |
| G-CSF      | V221-11_1 | 150 | 2 | 30,6  |
| G-CSF      | V221-13_1 | 150 | 7 | 85,2  |
| G-CSF      | V221-15_1 | 150 | 1 | 16,9  |
| G-CSF      | V222-19_1 | 150 | 2 | 25,7  |
| G-CSF      | V222-19_2 | 150 | 2 | 22,9  |
| G-CSF      | V222-20_1 | 150 | 3 | 53,4  |
| G-CSF      | V222-21_1 | 150 | 3 | 39,5  |
| G-CSF      | V222-22_1 | 150 | 6 | 79,9  |
| G-CSF      | V222-22_2 | 150 | 3 | 64,9  |

|       |           |     |   |       |
|-------|-----------|-----|---|-------|
| G-CSF | V222-23_1 | 150 | 6 | 136,7 |
| G-CSF | V222-24_1 | 150 | 4 | 47    |
| G-CSF | V301-18_1 | 150 | 1 | 10,5  |
| G-CSF | V301-18_2 | 150 | 1 | 10,8  |
| G-CSF | V301-18_3 | 150 | 1 | 11,3  |
| G-CSF | V301-19_1 | 150 | 1 | 21,2  |
| G-CSF | V301-19_2 | 150 | 1 | 11,2  |
| G-CSF | V301-20_1 | 150 | 3 | 42,4  |
| G-CSF | V301-20_2 | 150 | 2 | 29,1  |
| G-CSF | V302-15_1 | 150 | 1 | 10,8  |
| G-CSF | V302-15_2 | 150 | 2 | 21,2  |
| G-CSF | V302-15_3 | 150 | 2 | 36,2  |
| G-CSF | V302-16_1 | 150 | 2 | 22,2  |
| G-CSF | V302-16_2 | 150 | 2 | 31,7  |
| G-CSF | V302-16_3 | 150 | 1 | 81,7  |
| G-CSF | V302-16_4 | 150 | 1 | 11,2  |
| G-CSF | V302-17_1 | 150 | 1 | 12,6  |
| G-CSF | V302-17_2 | 150 | 2 | 20,9  |
| G-CSF | V302-17_3 | 150 | 1 | 13,3  |
| G-CSF | V303-15_1 | 150 | 1 | 40,2  |
| G-CSF | V303-15_2 | 150 | 1 | 10,6  |
| G-CSF | V303-15_3 | 150 | 1 | 10,7  |
| G-CSF | V303-16_1 | 150 | 1 | 24,9  |
| G-CSF | V303-16_2 | 150 | 1 | 15,8  |
| G-CSF | V303-16_3 | 150 | 3 | 22    |
| G-CSF | V303-17_1 | 150 | 6 | 83,6  |

#### basilar dendrite Sholl 10 $\mu$ m

| Group   | number    | Radius( $\mu$ m) | Intersections | Length( $\mu$ m) |
|---------|-----------|------------------|---------------|------------------|
| Control | V215-10_1 | 10               | 4             | 6,8              |
| Control | V215-10_2 | 10               | 0             | 0                |
| Control | V215-11_1 | 10               | 4             | 14,5             |
| Control | V215-12_1 | 10               | 0             | 0                |
| Control | V215-12_2 | 10               | 4             | 6                |
| Control | V215-13_1 | 10               | 3             | 4,6              |
| Control | V215-15_1 | 10               | 3             | 11,6             |
| Control | V215-15_2 | 10               | 0             | 0                |
| Control | V215-16_1 | 10               | 4             | 9,9              |
| Control | V215-18_1 | 10               | 6             | 12               |
| Control | V216-11_1 | 10               | 0             | 0                |
| Control | V216-12_1 | 10               | 2             | 5,3              |
| Control | V216-13_1 | 10               | 3             | 4,4              |
| Control | V216-14_1 | 10               | 1             | 1,3              |
| Control | V216-14_2 | 10               | 0             | 0                |
| Control | V216-16_1 | 10               | 4             | 8,2              |
| Control | V216-16_2 | 10               | 4             | 3                |
| Control | V216-17_1 | 10               | 0             | 0                |
| Control | V216-18_1 | 10               | 5             | 22,5             |
| Control | V216-18_2 | 10               | 2             | 2,1              |
| Control | V219-6_1  | 10               | 0             | 0                |
| Control | V219-11_1 | 10               | 0             | 0                |
| Control | V219-12_1 | 10               | 2             | 2,4              |
| Control | V219-13_1 | 10               | 2             | 4,9              |
| Control | V219-13_2 | 10               | 5             | 17               |

|         |           |    |   |      |
|---------|-----------|----|---|------|
| Control | V219-14_1 | 10 | 1 | 0,1  |
| Control | V219-14_2 | 10 | 2 | 1,9  |
| Control | V219-16_1 | 10 | 4 | 4,6  |
| Control | V297-19_1 | 10 | 1 | 1,5  |
| Control | V297-19_2 | 10 | 0 | 0    |
| Control | V297-20_1 | 10 | 0 | 0    |
| Control | V297-20_2 | 10 | 3 | 5,2  |
| Control | V297-20_3 | 10 | 0 | 0    |
| Control | V297-22_1 | 10 | 2 | 2,1  |
| Control | V297-22_2 | 10 | 3 | 5,1  |
| Control | V298-15_1 | 10 | 1 | 2,6  |
| Control | V298-16_1 | 10 | 1 | 1    |
| Control | V298-16_2 | 10 | 0 | 0    |
| Control | V298-16_3 | 10 | 0 | 0    |
| Control | V298-17_1 | 10 | 6 | 10,2 |
| Control | V298-17_2 | 10 | 2 | 4,2  |
| Control | V298-17_3 | 10 | 3 | 2,6  |
| Control | V308-17_1 | 10 | 4 | 7,4  |
| Control | V308-17_2 | 10 | 0 | 0    |
| Control | V308-17_3 | 10 | 4 | 5,9  |
| Control | V308-17_4 | 10 | 5 | 14,2 |
| Control | V308-18_1 | 10 | 3 | 4,9  |
| Control | V308-18_2 | 10 | 2 | 4,2  |
| Control | V308-18_3 | 10 | 1 | 3,1  |
| CIMT    | V211-10_1 | 10 | 1 | 0,6  |
| CIMT    | V211-10_2 | 10 | 0 | 0    |
| CIMT    | V211-11_1 | 10 | 0 | 0    |
| CIMT    | V211-11_2 | 10 | 0 | 0    |
| CIMT    | V211-12_1 | 10 | 2 | 3,4  |
| CIMT    | V211-13_1 | 10 | 1 | 5,1  |
| CIMT    | V211-13_2 | 10 | 2 | 1,6  |
| CIMT    | V211-15_1 | 10 | 6 | 12,4 |
| CIMT    | V211-15_2 | 10 | 3 | 2,9  |
| CIMT    | V211-16_1 | 10 | 2 | 5,2  |
| CIMT    | V212-14_1 | 10 | 1 | 0,6  |
| CIMT    | V212-14_2 | 10 | 3 | 0,6  |
| CIMT    | V212-15_1 | 10 | 3 | 2    |
| CIMT    | V212-18_1 | 10 | 0 | 0    |
| CIMT    | V212-21_1 | 10 | 0 | 0    |
| CIMT    | V212-21_2 | 10 | 0 | 0    |
| CIMT    | V212-22_1 | 10 | 2 | 2,2  |
| CIMT    | V212-23_1 | 10 | 2 | 22,2 |
| CIMT    | V212-23_2 | 10 | 0 | 0    |
| CIMT    | V212-24_1 | 10 | 2 | 0,6  |
| CIMT    | V218-9_1  | 10 | 0 | 0    |
| CIMT    | V218-10_1 | 10 | 0 | 0    |
| CIMT    | V218-11_1 | 10 | 0 | 0    |
| CIMT    | V218-12_1 | 10 | 2 | 3,3  |
| CIMT    | V218-12_2 | 10 | 0 | 0    |
| CIMT    | V218-13_1 | 10 | 0 | 0    |
| CIMT    | V218-15_1 | 10 | 4 | 4,9  |
| CIMT    | V218-17_1 | 10 | 1 | 1,1  |
| CIMT    | V299-14_1 | 10 | 2 | 3,6  |
| CIMT    | V299-15_1 | 10 | 0 | 0    |
| CIMT    | V299-15_2 | 10 | 1 | 1    |
| CIMT    | V299-16_1 | 10 | 1 | 3    |

|            |           |    |   |      |
|------------|-----------|----|---|------|
| CIMT       | V299-16_2 | 10 | 2 | 4,3  |
| CIMT       | V299-17_1 | 10 | 1 | 2,4  |
| CIMT       | V299-17_2 | 10 | 2 | 6,8  |
| CIMT       | V300-16_1 | 10 | 0 | 0    |
| CIMT       | V300-18_1 | 10 | 5 | 9,2  |
| CIMT       | V300-18_2 | 10 | 6 | 9,9  |
| CIMT       | V300-20_1 | 10 | 4 | 3,6  |
| CIMT       | V300-22_1 | 10 | 5 | 11,2 |
| CIMT       | V300-23_1 | 10 | 4 | 10,2 |
| CIMT       | V300-23_2 | 10 | 1 | 6    |
| CIMT       | V309-15_1 | 10 | 5 | 12,8 |
| CIMT       | V309-15_2 | 10 | 4 | 13,3 |
| CIMT       | V309-16_1 | 10 | 0 | 0    |
| CIMT       | V309-16_2 | 10 | 3 | 4,4  |
| CIMT       | V309-16_3 | 10 | 3 | 5,7  |
| CIMT       | V309-17_1 | 10 | 7 | 21   |
| CIMT       | V309-17_2 | 10 | 5 | 9,1  |
| CIMT+G-CSF | V213-13_1 | 10 | 4 | 14,4 |
| CIMT+G-CSF | V213-16_1 | 10 | 3 | 8,3  |
| CIMT+G-CSF | V213-17_1 | 10 | 6 | 24,9 |
| CIMT+G-CSF | V213-17_2 | 10 | 3 | 1,4  |
| CIMT+G-CSF | V213-18_1 | 10 | 2 | 1,6  |
| CIMT+G-CSF | V213-18_2 | 10 | 0 | 0    |
| CIMT+G-CSF | V213-19_1 | 10 | 0 | 0    |
| CIMT+G-CSF | V213-19_2 | 10 | 7 | 24,7 |
| CIMT+G-CSF | V213-20_1 | 10 | 4 | 8,1  |
| CIMT+G-CSF | V213-22_1 | 10 | 2 | 1,5  |
| CIMT+G-CSF | V213-23_1 | 10 | 2 | 7,2  |
| CIMT+G-CSF | V214-14_1 | 10 | 4 | 12,9 |
| CIMT+G-CSF | V214-17_1 | 10 | 3 | 4,8  |
| CIMT+G-CSF | V214-18_1 | 10 | 0 | 0    |
| CIMT+G-CSF | V214-19_1 | 10 | 5 | 16,5 |
| CIMT+G-CSF | V214-19_2 | 10 | 2 | 1,1  |
| CIMT+G-CSF | V214-20_1 | 10 | 3 | 5    |
| CIMT+G-CSF | V214-21_1 | 10 | 1 | 2,8  |
| CIMT+G-CSF | V217-1_1  | 10 | 0 | 0    |
| CIMT+G-CSF | V217-2_1  | 10 | 2 | 0,8  |
| CIMT+G-CSF | V217-4_1  | 10 | 0 | 0    |
| CIMT+G-CSF | V217-6_1  | 10 | 4 | 7,1  |
| CIMT+G-CSF | V217-6_3  | 10 | 0 | 0    |
| CIMT+G-CSF | V217-8_1  | 10 | 3 | 6    |
| CIMT+G-CSF | V217-8_4  | 10 | 0 | 0    |
| CIMT+G-CSF | V217-10_1 | 10 | 1 | 0,2  |
| CIMT+G-CSF | V217-11_1 | 10 | 0 | 0    |
| CIMT+G-CSF | V304-16_1 | 10 | 7 | 24,2 |
| CIMT+G-CSF | V304-17_1 | 10 | 2 | 6,6  |
| CIMT+G-CSF | V304-17_2 | 10 | 2 | 10,6 |
| CIMT+G-CSF | V304-17_3 | 10 | 1 | 0,9  |
| CIMT+G-CSF | V304-17_4 | 10 | 0 | 0    |
| CIMT+G-CSF | V304-19_1 | 10 | 3 | 8,8  |
| CIMT+G-CSF | V304-19_2 | 10 | 5 | 26,7 |
| CIMT+G-CSF | V305-17_1 | 10 | 3 | 2,7  |
| CIMT+G-CSF | V305-17_2 | 10 | 0 | 0    |
| CIMT+G-CSF | V305-17_3 | 10 | 5 | 12   |
| CIMT+G-CSF | V305-18_1 | 10 | 6 | 15,5 |
| CIMT+G-CSF | V305-18_2 | 10 | 4 | 23,2 |

|            |           |    |   |      |
|------------|-----------|----|---|------|
| CIMT+G-CSF | V305-18_3 | 10 | 3 | 5,3  |
| CIMT+G-CSF | V305-18_4 | 10 | 3 | 9,7  |
| CIMT+G-CSF | V305-19_1 | 10 | 1 | 3,1  |
| CIMT/G-CSF | V306-16_1 | 10 | 4 | 10,1 |
| CIMT/G-CSF | V306-16_2 | 10 | 5 | 8,7  |
| CIMT/G-CSF | V306-17_1 | 10 | 5 | 6,5  |
| CIMT/G-CSF | V306-17_2 | 10 | 2 | 4,9  |
| CIMT/G-CSF | V306-17_3 | 10 | 4 | 10   |
| CIMT/G-CSF | V306-17_4 | 10 | 5 | 21,6 |
| CIMT/G-CSF | V306-17_5 | 10 | 4 | 12,3 |
| CIMT/G-CSF | V311-16_1 | 10 | 0 | 0    |
| CIMT/G-CSF | V311-17_1 | 10 | 0 | 0    |
| CIMT/G-CSF | V311-17_2 | 10 | 3 | 8,7  |
| CIMT/G-CSF | V311-19_1 | 10 | 0 | 0    |
| CIMT/G-CSF | V311-20_1 | 10 | 0 | 0    |
| CIMT/G-CSF | V311-20_2 | 10 | 0 | 0    |
| CIMT/G-CSF | V311-20_3 | 10 | 1 | 1    |
| CIMT/G-CSF | V313-14_1 | 10 | 2 | 4,6  |
| CIMT/G-CSF | V313-15_1 | 10 | 6 | 18   |
| CIMT/G-CSF | V313-15_2 | 10 | 1 | 1,2  |
| CIMT/G-CSF | V313-17_1 | 10 | 2 | 2,4  |
| CIMT/G-CSF | V313-17_2 | 10 | 0 | 0    |
| CIMT/G-CSF | V313-17_3 | 10 | 2 | 8,1  |
| CIMT/G-CSF | V313-19_1 | 10 | 5 | 8,5  |
| CIMT/G-CSF | V314-16_1 | 10 | 3 | 8,8  |
| CIMT/G-CSF | V314-16_2 | 10 | 0 | 0    |
| CIMT/G-CSF | V314-17_1 | 10 | 3 | 3,3  |
| CIMT/G-CSF | V314-17_2 | 10 | 4 | 27,3 |
| CIMT/G-CSF | V314-17_3 | 10 | 7 | 23,9 |
| CIMT/G-CSF | V314-18_1 | 10 | 7 | 8,4  |
| CIMT/G-CSF | V314-18_2 | 10 | 1 | 6,9  |
| CIMT/G-CSF | V315-11_1 | 10 | 1 | 7,5  |
| CIMT/G-CSF | V315-11_2 | 10 | 2 | 5,1  |
| CIMT/G-CSF | V315-13_1 | 10 | 0 | 0    |
| CIMT/G-CSF | V315-13_2 | 10 | 0 | 0    |
| CIMT/G-CSF | V315-14_1 | 10 | 4 | 11,7 |
| CIMT/G-CSF | V315-14_2 | 10 | 0 | 0    |
| CIMT/G-CSF | V315-14_3 | 10 | 0 | 0    |
| G-CSF      | V220-9_1  | 10 | 6 | 18,1 |
| G-CSF      | V220-11_1 | 10 | 2 | 7,8  |
| G-CSF      | V220-12_1 | 10 | 1 | 1,4  |
| G-CSF      | V220-16_1 | 10 | 0 | 0    |
| G-CSF      | V220-16_2 | 10 | 4 | 17,9 |
| G-CSF      | V220-17_1 | 10 | 1 | 1,6  |
| G-CSF      | V220-18_1 | 10 | 7 | 21   |
| G-CSF      | V221-2_1  | 10 | 3 | 4,2  |
| G-CSF      | V221-4_1  | 10 | 1 | 0,7  |
| G-CSF      | V221-5_1  | 10 | 1 | 2,4  |
| G-CSF      | V221-6_1  | 10 | 1 | 4,3  |
| G-CSF      | V221-7_1  | 10 | 5 | 19,9 |
| G-CSF      | V221-7_2  | 10 | 2 | 1,8  |
| G-CSF      | V221-11_1 | 10 | 2 | 2    |
| G-CSF      | V221-13_1 | 10 | 6 | 6,5  |
| G-CSF      | V221-15_1 | 10 | 2 | 1,7  |
| G-CSF      | V221-20_1 | 10 | 2 | 3,9  |
| G-CSF      | V222-19_1 | 10 | 4 | 8,9  |

|       |           |    |   |      |
|-------|-----------|----|---|------|
| G-CSF | V222-19_2 | 10 | 1 | 0,3  |
| G-CSF | V222-20_1 | 10 | 0 | 0    |
| G-CSF | V222-20_2 | 10 | 1 | 1,1  |
| G-CSF | V222-21_1 | 10 | 1 | 0,7  |
| G-CSF | V222-22_1 | 10 | 0 | 0    |
| G-CSF | V222-22_2 | 10 | 0 | 0    |
| G-CSF | V222-23_1 | 10 | 0 | 0    |
| G-CSF | V222-24_1 | 10 | 0 | 0    |
| G-CSF | V301-18_1 | 10 | 2 | 1,7  |
| G-CSF | V301-18_2 | 10 | 4 | 14,8 |
| G-CSF | V301-18_3 | 10 | 1 | 0,6  |
| G-CSF | V301-19_1 | 10 | 5 | 13,4 |
| G-CSF | V301-19_2 | 10 | 4 | 13,8 |
| G-CSF | V301-20_1 | 10 | 4 | 7,6  |
| G-CSF | V301-20_2 | 10 | 7 | 24,1 |
| G-CSF | V302-15_1 | 10 | 3 | 5,6  |
| G-CSF | V302-15_2 | 10 | 0 | 0    |
| G-CSF | V302-15_3 | 10 | 2 | 10   |
| G-CSF | V302-16_1 | 10 | 0 | 0    |
| G-CSF | V302-16_2 | 10 | 2 | 3,2  |
| G-CSF | V302-16_3 | 10 | 4 | 9,3  |
| G-CSF | V302-16_4 | 10 | 0 | 0    |
| G-CSF | V302-17_1 | 10 | 0 | 0    |
| G-CSF | V302-17_2 | 10 | 2 | 5,6  |
| G-CSF | V302-17_3 | 10 | 3 | 13,3 |
| G-CSF | V303-15_1 | 10 | 0 | 0    |
| G-CSF | V303-15_2 | 10 | 0 | 0    |
| G-CSF | V303-15_3 | 10 | 0 | 0    |
| G-CSF | V303-16_1 | 10 | 1 | 2,1  |
| G-CSF | V303-16_2 | 10 | 3 | 7,5  |
| G-CSF | V303-16_3 | 10 | 1 | 3,5  |
| G-CSF | V303-17_1 | 10 | 3 | 5,5  |

#### basilar dendrite Sholl 20 $\mu$ m

| <b>Group</b> | <b>number</b> | <b>Radius(<math>\mu</math>m)</b> | <b>Intersections</b> | <b>Length(<math>\mu</math>m)</b> |
|--------------|---------------|----------------------------------|----------------------|----------------------------------|
| Control      | V215-10_1     | 20                               | 9                    | 111                              |
| Control      | V215-10_2     | 20                               | 10                   | 68,6                             |
| Control      | V215-11_1     | 20                               | 9                    | 107,9                            |
| Control      | V215-12_1     | 20                               | 1                    | 0,8                              |
| Control      | V215-12_2     | 20                               | 8                    | 100,9                            |
| Control      | V215-13_1     | 20                               | 13                   | 129,2                            |
| Control      | V215-15_1     | 20                               | 7                    | 75,4                             |
| Control      | V215-15_2     | 20                               | 6                    | 55,1                             |
| Control      | V215-16_1     | 20                               | 6                    | 57,5                             |
| Control      | V215-18_1     | 20                               | 10                   | 120,8                            |
| Control      | V216-11_1     | 20                               | 8                    | 44,2                             |
| Control      | V216-12_1     | 20                               | 6                    | 63,9                             |
| Control      | V216-13_1     | 20                               | 6                    | 77,7                             |
| Control      | V216-14_1     | 20                               | 9                    | 95,8                             |
| Control      | V216-14_2     | 20                               | 7                    | 73                               |
| Control      | V216-16_1     | 20                               | 10                   | 98                               |
| Control      | V216-16_2     | 20                               | 8                    | 106,5                            |
| Control      | V216-17_1     | 20                               | 4                    | 50,2                             |
| Control      | V216-18_1     | 20                               | 6                    | 108,2                            |

|         |           |    |    |       |
|---------|-----------|----|----|-------|
| Control | V216-18_2 | 20 | 9  | 72,8  |
| Control | V219-6_1  | 20 | 7  | 42    |
| Control | V219-11_1 | 20 | 5  | 33,2  |
| Control | V219-12_1 | 20 | 10 | 101,9 |
| Control | V219-13_1 | 20 | 4  | 51    |
| Control | V219-13_2 | 20 | 10 | 164,4 |
| Control | V219-14_1 | 20 | 11 | 142,8 |
| Control | V219-14_2 | 20 | 7  | 72,5  |
| Control | V219-16_1 | 20 | 8  | 108   |
| Control | V297-19_1 | 20 | 13 | 86,6  |
| Control | V297-19_2 | 20 | 5  | 41,3  |
| Control | V297-20_1 | 20 | 10 | 52,1  |
| Control | V297-20_2 | 20 | 7  | 62,3  |
| Control | V297-20_3 | 20 | 4  | 17,1  |
| Control | V297-22_1 | 20 | 8  | 94,2  |
| Control | V297-22_2 | 20 | 7  | 88,8  |
| Control | V298-15_1 | 20 | 9  | 82,6  |
| Control | V298-16_1 | 20 | 4  | 40,7  |
| Control | V298-16_2 | 20 | 4  | 11,8  |
| Control | V298-16_3 | 20 | 4  | 14,5  |
| Control | V298-17_1 | 20 | 7  | 95,9  |
| Control | V298-17_2 | 20 | 6  | 59,1  |
| Control | V298-17_3 | 20 | 13 | 146,9 |
| Control | V308-17_1 | 20 | 8  | 98,1  |
| Control | V308-17_2 | 20 | 2  | 15,1  |
| Control | V308-17_3 | 20 | 9  | 100,6 |
| Control | V308-17_4 | 20 | 9  | 86,8  |
| Control | V308-18_1 | 20 | 14 | 145,2 |
| Control | V308-18_2 | 20 | 9  | 65,1  |
| Control | V308-18_3 | 20 | 8  | 76    |
| CIMT    | V211-10_1 | 20 | 8  | 52,9  |
| CIMT    | V211-10_2 | 20 | 8  | 60    |
| CIMT    | V211-11_1 | 20 | 3  | 56,9  |
| CIMT    | V211-11_2 | 20 | 7  | 61,7  |
| CIMT    | V211-12_1 | 20 | 12 | 146,3 |
| CIMT    | V211-13_1 | 20 | 4  | 40,2  |
| CIMT    | V211-13_2 | 20 | 5  | 48    |
| CIMT    | V211-15_1 | 20 | 10 | 116,8 |
| CIMT    | V211-15_2 | 20 | 15 | 122,9 |
| CIMT    | V211-16_1 | 20 | 10 | 82,3  |
| CIMT    | V212-14_1 | 20 | 3  | 33,3  |
| CIMT    | V212-14_2 | 20 | 5  | 44,6  |
| CIMT    | V212-15_1 | 20 | 6  | 76    |
| CIMT    | V212-18_1 | 20 | 7  | 61,1  |
| CIMT    | V212-21_1 | 20 | 6  | 57,5  |
| CIMT    | V212-21_2 | 20 | 8  | 34,8  |
| CIMT    | V212-22_1 | 20 | 6  | 50,5  |
| CIMT    | V212-23_1 | 20 | 6  | 62,3  |
| CIMT    | V212-23_2 | 20 | 2  | 34,9  |
| CIMT    | V212-24_1 | 20 | 4  | 55,1  |
| CIMT    | V218-9_1  | 20 | 8  | 57,5  |
| CIMT    | V218-10_1 | 20 | 9  | 93,4  |
| CIMT    | V218-11_1 | 20 | 6  | 33,6  |
| CIMT    | V218-12_1 | 20 | 12 | 93,8  |
| CIMT    | V218-12_2 | 20 | 9  | 46,7  |
| CIMT    | V218-13_1 | 20 | 15 | 147,1 |



|            |           |    |    |       |
|------------|-----------|----|----|-------|
| CIMT       | V218-15_1 | 20 | 9  | 84,1  |
| CIMT       | V218-17_1 | 20 | 10 | 96,6  |
| CIMT       | V299-14_1 | 20 | 10 | 83,5  |
| CIMT       | V299-15_1 | 20 | 5  | 16,7  |
| CIMT       | V299-15_2 | 20 | 8  | 53,4  |
| CIMT       | V299-16_1 | 20 | 10 | 89,4  |
| CIMT       | V299-16_2 | 20 | 5  | 37,1  |
| CIMT       | V299-17_1 | 20 | 12 | 79,1  |
| CIMT       | V299-17_2 | 20 | 7  | 72,7  |
| CIMT       | V300-16_1 | 20 | 3  | 12,7  |
| CIMT       | V300-18_1 | 20 | 8  | 83,5  |
| CIMT       | V300-18_2 | 20 | 8  | 95,1  |
| CIMT       | V300-20_1 | 20 | 10 | 137,5 |
| CIMT       | V300-22_1 | 20 | 12 | 166,9 |
| CIMT       | V300-23_1 | 20 | 11 | 98,3  |
| CIMT       | V300-23_2 | 20 | 14 | 147,6 |
| CIMT       | V309-15_1 | 20 | 8  | 86,4  |
| CIMT       | V309-15_2 | 20 | 10 | 121,2 |
| CIMT       | V309-16_1 | 20 | 1  | 16,4  |
| CIMT       | V309-16_2 | 20 | 6  | 80,4  |
| CIMT       | V309-16_3 | 20 | 11 | 93,8  |
| CIMT       | V309-17_1 | 20 | 11 | 118,4 |
| CIMT       | V309-17_2 | 20 | 9  | 124,3 |
| CIMT+G-CSF | V213-13_1 | 20 | 5  | 68,7  |
| CIMT+G-CSF | V213-16_1 | 20 | 4  | 45,2  |
| CIMT+G-CSF | V213-17_1 | 20 | 8  | 106,8 |
| CIMT+G-CSF | V213-17_2 | 20 | 6  | 57,8  |
| CIMT+G-CSF | V213-18_1 | 20 | 9  | 72,6  |
| CIMT+G-CSF | V213-18_2 | 20 | 9  | 70,4  |
| CIMT+G-CSF | V213-19_1 | 20 | 1  | 3,3   |
| CIMT+G-CSF | V213-19_2 | 20 | 10 | 131,6 |
| CIMT+G-CSF | V213-20_1 | 20 | 7  | 70,5  |
| CIMT+G-CSF | V213-22_1 | 20 | 7  | 59,4  |
| CIMT+G-CSF | V213-23_1 | 20 | 11 | 139,4 |
| CIMT+G-CSF | V214-14_1 | 20 | 15 | 171,6 |
| CIMT+G-CSF | V214-17_1 | 20 | 7  | 66    |
| CIMT+G-CSF | V214-18_1 | 20 | 4  | 43,2  |
| CIMT+G-CSF | V214-19_1 | 20 | 7  | 86,3  |
| CIMT+G-CSF | V214-19_2 | 20 | 6  | 71,2  |
| CIMT+G-CSF | V214-20_1 | 20 | 13 | 129,4 |
| CIMT+G-CSF | V214-21_1 | 20 | 8  | 61,4  |
| CIMT+G-CSF | V217-1_1  | 20 | 14 | 79    |
| CIMT+G-CSF | V217-2_1  | 20 | 12 | 124,7 |
| CIMT+G-CSF | V217-4_1  | 20 | 4  | 15,4  |
| CIMT+G-CSF | V217-6_1  | 20 | 9  | 116,2 |
| CIMT+G-CSF | V217-6_3  | 20 | 7  | 102,1 |
| CIMT+G-CSF | V217-8_1  | 20 | 13 | 102,5 |
| CIMT+G-CSF | V217-8_4  | 20 | 2  | 9,2   |
| CIMT+G-CSF | V217-10_1 | 20 | 12 | 100,3 |
| CIMT+G-CSF | V217-11_1 | 20 | 9  | 70,5  |
| CIMT+G-CSF | V304-16_1 | 20 | 7  | 114,3 |
| CIMT+G-CSF | V304-17_1 | 20 | 8  | 62,9  |
| CIMT+G-CSF | V304-17_2 | 20 | 3  | 38,9  |
| CIMT+G-CSF | V304-17_3 | 20 | 9  | 99,2  |
| CIMT+G-CSF | V304-17_4 | 20 | 5  | 53,7  |
| CIMT+G-CSF | V304-19_1 | 20 | 6  | 89,4  |

|            |           |    |    |       |
|------------|-----------|----|----|-------|
| CIMT+G-CSF | V304-19_2 | 20 | 6  | 94,8  |
| CIMT+G-CSF | V305-17_1 | 20 | 6  | 84,9  |
| CIMT+G-CSF | V305-17_2 | 20 | 4  | 24,3  |
| CIMT+G-CSF | V305-17_3 | 20 | 11 | 153,8 |
| CIMT+G-CSF | V305-18_1 | 20 | 11 | 117,5 |
| CIMT+G-CSF | V305-18_2 | 20 | 10 | 111,3 |
| CIMT+G-CSF | V305-18_3 | 20 | 7  | 45,7  |
| CIMT+G-CSF | V305-18_4 | 20 | 7  | 85,5  |
| CIMT+G-CSF | V305-19_1 | 20 | 6  | 39,1  |
| CIMT/G-CSF | V306-16_1 | 20 | 10 | 145   |
| CIMT/G-CSF | V306-16_2 | 20 | 10 | 112,1 |
| CIMT/G-CSF | V306-17_1 | 20 | 12 | 140,8 |
| CIMT/G-CSF | V306-17_2 | 20 | 3  | 35,8  |
| CIMT/G-CSF | V306-17_3 | 20 | 10 | 127,6 |
| CIMT/G-CSF | V306-17_4 | 20 | 11 | 112,8 |
| CIMT/G-CSF | V306-17_5 | 20 | 7  | 75,4  |
| CIMT/G-CSF | V311-16_1 | 20 | 12 | 92,7  |
| CIMT/G-CSF | V311-17_1 | 20 | 13 | 131,9 |
| CIMT/G-CSF | V311-17_2 | 20 | 9  | 116,6 |
| CIMT/G-CSF | V311-19_1 | 20 | 1  | 17,5  |
| CIMT/G-CSF | V311-20_1 | 20 | 7  | 57,6  |
| CIMT/G-CSF | V311-20_2 | 20 | 6  | 80,8  |
| CIMT/G-CSF | V311-20_3 | 20 | 7  | 42,5  |
| CIMT/G-CSF | V313-14_1 | 20 | 3  | 48,8  |
| CIMT/G-CSF | V313-15_1 | 20 | 8  | 71,1  |
| CIMT/G-CSF | V313-15_2 | 20 | 5  | 66,6  |
| CIMT/G-CSF | V313-17_1 | 20 | 9  | 88,5  |
| CIMT/G-CSF | V313-17_2 | 20 | 1  | 4,8   |
| CIMT/G-CSF | V313-17_3 | 20 | 4  | 71,7  |
| CIMT/G-CSF | V313-19_1 | 20 | 9  | 105,1 |
| CIMT/G-CSF | V314-16_1 | 20 | 8  | 70,8  |
| CIMT/G-CSF | V314-16_2 | 20 | 3  | 26,4  |
| CIMT/G-CSF | V314-17_1 | 20 | 12 | 120,6 |
| CIMT/G-CSF | V314-17_2 | 20 | 5  | 80,2  |
| CIMT/G-CSF | V314-17_3 | 20 | 12 | 136,2 |
| CIMT/G-CSF | V314-18_1 | 20 | 12 | 140,5 |
| CIMT/G-CSF | V314-18_2 | 20 | 7  | 72    |
| CIMT/G-CSF | V315-11_1 | 20 | 8  | 123,9 |
| CIMT/G-CSF | V315-11_2 | 20 | 11 | 116,4 |
| CIMT/G-CSF | V315-13_1 | 20 | 3  | 55    |
| CIMT/G-CSF | V315-13_2 | 20 | 8  | 65,7  |
| CIMT/G-CSF | V315-14_1 | 20 | 8  | 98,6  |
| CIMT/G-CSF | V315-14_2 | 20 | 9  | 79,6  |
| CIMT/G-CSF | V315-14_3 | 20 | 11 | 93,4  |
| G-CSF      | V220-9_1  | 20 | 11 | 136,2 |
| G-CSF      | V220-11_1 | 20 | 6  | 69,9  |
| G-CSF      | V220-12_1 | 20 | 5  | 85,8  |
| G-CSF      | V220-16_1 | 20 | 1  | 21,4  |
| G-CSF      | V220-16_2 | 20 | 11 | 124,9 |
| G-CSF      | V220-17_1 | 20 | 4  | 27,3  |
| G-CSF      | V220-18_1 | 20 | 8  | 86,2  |
| G-CSF      | V221-2_1  | 20 | 11 | 116,6 |
| G-CSF      | V221-4_1  | 20 | 5  | 53    |
| G-CSF      | V221-5_1  | 20 | 9  | 79,7  |
| G-CSF      | V221-6_1  | 20 | 4  | 24,4  |
| G-CSF      | V221-7_1  | 20 | 6  | 70,9  |

|       |           |    |    |       |
|-------|-----------|----|----|-------|
| G-CSF | V221-7_2  | 20 | 11 | 106,2 |
| G-CSF | V221-11_1 | 20 | 3  | 28,2  |
| G-CSF | V221-13_1 | 20 | 17 | 181   |
| G-CSF | V221-15_1 | 20 | 5  | 52,8  |
| G-CSF | V221-20_1 | 20 | 9  | 87,9  |
| G-CSF | V222-19_1 | 20 | 10 | 105,9 |
| G-CSF | V222-19_2 | 20 | 11 | 138,4 |
| G-CSF | V222-20_1 | 20 | 6  | 37,2  |
| G-CSF | V222-20_2 | 20 | 4  | 41,5  |
| G-CSF | V222-21_1 | 20 | 12 | 112,2 |
| G-CSF | V222-22_1 | 20 | 1  | 1,5   |
| G-CSF | V222-22_2 | 20 | 9  | 97    |
| G-CSF | V222-23_1 | 20 | 8  | 62,5  |
| G-CSF | V222-24_1 | 20 | 5  | 27,4  |
| G-CSF | V301-18_1 | 20 | 11 | 139,4 |
| G-CSF | V301-18_2 | 20 | 7  | 95,3  |
| G-CSF | V301-18_3 | 20 | 5  | 64,2  |
| G-CSF | V301-19_1 | 20 | 8  | 83,9  |
| G-CSF | V301-19_2 | 20 | 11 | 95    |
| G-CSF | V301-20_1 | 20 | 10 | 135,6 |
| G-CSF | V301-20_2 | 20 | 13 | 179,5 |
| G-CSF | V302-15_1 | 20 | 10 | 105,1 |
| G-CSF | V302-15_2 | 20 | 8  | 104,8 |
| G-CSF | V302-15_3 | 20 | 6  | 70,8  |
| G-CSF | V302-16_1 | 20 | 2  | 17,3  |
| G-CSF | V302-16_2 | 20 | 4  | 68    |
| G-CSF | V302-16_3 | 20 | 6  | 68,1  |
| G-CSF | V302-16_4 | 20 | 7  | 37,6  |
| G-CSF | V302-17_1 | 20 | 9  | 84,9  |
| G-CSF | V302-17_2 | 20 | 10 | 118,7 |
| G-CSF | V302-17_3 | 20 | 6  | 69,2  |
| G-CSF | V303-15_1 | 20 | 7  | 76,8  |
| G-CSF | V303-15_2 | 20 | 5  | 22,6  |
| G-CSF | V303-15_3 | 20 | 1  | 9,3   |
| G-CSF | V303-16_1 | 20 | 9  | 107,5 |
| G-CSF | V303-16_2 | 20 | 10 | 94,1  |
| G-CSF | V303-16_3 | 20 | 14 | 127,6 |
| G-CSF | V303-17_1 | 20 | 7  | 67    |

#### basilar dendrite Sholl 30 $\mu$ m

| Group   | number    | Radius( $\mu$ m) | Intersections | Length( $\mu$ m) |
|---------|-----------|------------------|---------------|------------------|
| Control | V215-10_1 | 30               | 9             | 120,5            |
| Control | V215-10_2 | 30               | 15            | 184,8            |
| Control | V215-11_1 | 30               | 10            | 172,1            |
| Control | V215-12_1 | 30               | 10            | 132,2            |
| Control | V215-12_2 | 30               | 15            | 182,9            |
| Control | V215-13_1 | 30               | 12            | 164,4            |
| Control | V215-15_1 | 30               | 6             | 77,8             |
| Control | V215-15_2 | 30               | 6             | 97,2             |
| Control | V215-16_1 | 30               | 8             | 101              |
| Control | V215-18_1 | 30               | 9             | 137,6            |
| Control | V216-11_1 | 30               | 11            | 149              |
| Control | V216-12_1 | 30               | 8             | 88,1             |
| Control | V216-13_1 | 30               | 6             | 95,9             |

|         |           |    |    |       |
|---------|-----------|----|----|-------|
| Control | V216-14_1 | 30 | 10 | 146,8 |
| Control | V216-14_2 | 30 | 9  | 107   |
| Control | V216-16_1 | 30 | 9  | 149   |
| Control | V216-16_2 | 30 | 8  | 101,6 |
| Control | V216-17_1 | 30 | 11 | 135,8 |
| Control | V216-18_1 | 30 | 7  | 79,4  |
| Control | V216-18_2 | 30 | 12 | 175,4 |
| Control | V219-6_1  | 30 | 10 | 148,2 |
| Control | V219-11_1 | 30 | 9  | 110,1 |
| Control | V219-12_1 | 30 | 13 | 189,1 |
| Control | V219-13_1 | 30 | 8  | 82,9  |
| Control | V219-13_2 | 30 | 10 | 158,1 |
| Control | V219-14_1 | 30 | 9  | 148,6 |
| Control | V219-14_2 | 30 | 12 | 208,1 |
| Control | V219-16_1 | 30 | 10 | 111   |
| Control | V297-19_1 | 30 | 16 | 198,7 |
| Control | V297-19_2 | 30 | 7  | 124,4 |
| Control | V297-20_1 | 30 | 10 | 164,9 |
| Control | V297-20_2 | 30 | 6  | 87,2  |
| Control | V297-20_3 | 30 | 9  | 162   |
| Control | V297-22_1 | 30 | 15 | 180,3 |
| Control | V297-22_2 | 30 | 9  | 155,3 |
| Control | V298-15_1 | 30 | 12 | 145,3 |
| Control | V298-16_1 | 30 | 8  | 98,4  |
| Control | V298-16_2 | 30 | 15 | 173,2 |
| Control | V298-16_3 | 30 | 5  | 72,6  |
| Control | V298-17_1 | 30 | 6  | 80,1  |
| Control | V298-17_2 | 30 | 10 | 109,2 |
| Control | V298-17_3 | 30 | 14 | 179,4 |
| Control | V308-17_1 | 30 | 12 | 138,4 |
| Control | V308-17_2 | 30 | 5  | 89,2  |
| Control | V308-17_3 | 30 | 15 | 185,8 |
| Control | V308-17_4 | 30 | 10 | 132,1 |
| Control | V308-18_1 | 30 | 17 | 225   |
| Control | V308-18_2 | 30 | 9  | 153,2 |
| Control | V308-18_3 | 30 | 11 | 128,9 |
| CIMT    | V211-10_1 | 30 | 13 | 158,4 |
| CIMT    | V211-10_2 | 30 | 10 | 168,6 |
| CIMT    | V211-11_1 | 30 | 6  | 59,2  |
| CIMT    | V211-11_2 | 30 | 10 | 152,6 |
| CIMT    | V211-12_1 | 30 | 11 | 198   |
| CIMT    | V211-13_1 | 30 | 7  | 58,6  |
| CIMT    | V211-13_2 | 30 | 11 | 165,3 |
| CIMT    | V211-15_1 | 30 | 8  | 130,1 |
| CIMT    | V211-15_2 | 30 | 12 | 254   |
| CIMT    | V211-16_1 | 30 | 14 | 188,7 |
| CIMT    | V212-14_1 | 30 | 6  | 70,8  |
| CIMT    | V212-14_2 | 30 | 7  | 100,1 |
| CIMT    | V212-15_1 | 30 | 10 | 115,2 |
| CIMT    | V212-18_1 | 30 | 11 | 189,8 |
| CIMT    | V212-21_1 | 30 | 8  | 86,4  |
| CIMT    | V212-21_2 | 30 | 15 | 187,9 |
| CIMT    | V212-22_1 | 30 | 9  | 104,9 |
| CIMT    | V212-23_1 | 30 | 8  | 127,1 |
| CIMT    | V212-23_2 | 30 | 4  | 46,9  |
| CIMT    | V212-24_1 | 30 | 4  | 51,7  |

|            |           |    |    |       |
|------------|-----------|----|----|-------|
| CIMT       | V218-9_1  | 30 | 9  | 131,4 |
| CIMT       | V218-10_1 | 30 | 10 | 132,6 |
| CIMT       | V218-11_1 | 30 | 8  | 78,5  |
| CIMT       | V218-12_1 | 30 | 10 | 144,9 |
| CIMT       | V218-12_2 | 30 | 6  | 85,3  |
| CIMT       | V218-13_1 | 30 | 11 | 219,2 |
| CIMT       | V218-15_1 | 30 | 8  | 106,2 |
| CIMT       | V218-17_1 | 30 | 10 | 158,3 |
| CIMT       | V299-14_1 | 30 | 10 | 171,1 |
| CIMT       | V299-15_1 | 30 | 7  | 120,2 |
| CIMT       | V299-15_2 | 30 | 7  | 109   |
| CIMT       | V299-16_1 | 30 | 11 | 168   |
| CIMT       | V299-16_2 | 30 | 7  | 87,9  |
| CIMT       | V299-17_1 | 30 | 16 | 179,6 |
| CIMT       | V299-17_2 | 30 | 7  | 101,4 |
| CIMT       | V300-16_1 | 30 | 7  | 56,9  |
| CIMT       | V300-18_1 | 30 | 11 | 126,1 |
| CIMT       | V300-18_2 | 30 | 10 | 113,8 |
| CIMT       | V300-20_1 | 30 | 11 | 161,4 |
| CIMT       | V300-22_1 | 30 | 12 | 190,7 |
| CIMT       | V300-23_1 | 30 | 9  | 115,9 |
| CIMT       | V300-23_2 | 30 | 6  | 135,1 |
| CIMT       | V309-15_1 | 30 | 7  | 96,8  |
| CIMT       | V309-15_2 | 30 | 11 | 150,7 |
| CIMT       | V309-16_1 | 30 | 13 | 54,7  |
| CIMT       | V309-16_2 | 30 | 8  | 107,5 |
| CIMT       | V309-16_3 | 30 | 13 | 207,3 |
| CIMT       | V309-17_1 | 30 | 12 | 158,2 |
| CIMT       | V309-17_2 | 30 | 11 | 131   |
| CIMT+G-CSF | V213-13_1 | 30 | 5  | 75,3  |
| CIMT+G-CSF | V213-16_1 | 30 | 5  | 60,1  |
| CIMT+G-CSF | V213-17_1 | 30 | 9  | 120   |
| CIMT+G-CSF | V213-17_2 | 30 | 13 | 180,8 |
| CIMT+G-CSF | V213-18_1 | 30 | 16 | 195,7 |
| CIMT+G-CSF | V213-18_2 | 30 | 8  | 119,6 |
| CIMT+G-CSF | V213-19_1 | 30 | 3  | 26,2  |
| CIMT+G-CSF | V213-19_2 | 30 | 11 | 130,5 |
| CIMT+G-CSF | V213-20_1 | 30 | 8  | 92,6  |
| CIMT+G-CSF | V213-22_1 | 30 | 10 | 172,9 |
| CIMT+G-CSF | V213-23_1 | 30 | 15 | 189,1 |
| CIMT+G-CSF | V214-14_1 | 30 | 13 | 177,1 |
| CIMT+G-CSF | V214-17_1 | 30 | 10 | 117,4 |
| CIMT+G-CSF | V214-18_1 | 30 | 9  | 128,3 |
| CIMT+G-CSF | V214-19_1 | 30 | 10 | 99,5  |
| CIMT+G-CSF | V214-19_2 | 30 | 8  | 84,6  |
| CIMT+G-CSF | V214-20_1 | 30 | 13 | 193,4 |
| CIMT+G-CSF | V214-21_1 | 30 | 9  | 111,5 |
| CIMT+G-CSF | V217-1_1  | 30 | 16 | 252,8 |
| CIMT+G-CSF | V217-2_1  | 30 | 16 | 240,5 |
| CIMT+G-CSF | V217-4_1  | 30 | 12 | 73,5  |
| CIMT+G-CSF | V217-6_1  | 30 | 11 | 168,7 |
| CIMT+G-CSF | V217-6_3  | 30 | 12 | 169,2 |
| CIMT+G-CSF | V217-8_1  | 30 | 14 | 169   |
| CIMT+G-CSF | V217-8_4  | 30 | 7  | 104,9 |
| CIMT+G-CSF | V217-10_1 | 30 | 9  | 143,9 |
| CIMT+G-CSF | V217-11_1 | 30 | 11 | 154,9 |

|            |           |    |    |       |
|------------|-----------|----|----|-------|
| CIMT+G-CSF | V304-16_1 | 30 | 4  | 64,1  |
| CIMT+G-CSF | V304-17_1 | 30 | 12 | 178,9 |
| CIMT+G-CSF | V304-17_2 | 30 | 2  | 29,8  |
| CIMT+G-CSF | V304-17_3 | 30 | 10 | 147,3 |
| CIMT+G-CSF | V304-17_4 | 30 | 9  | 78,5  |
| CIMT+G-CSF | V304-19_1 | 30 | 4  | 63,9  |
| CIMT+G-CSF | V304-19_2 | 30 | 7  | 79,9  |
| CIMT+G-CSF | V305-17_1 | 30 | 10 | 124,6 |
| CIMT+G-CSF | V305-17_2 | 30 | 8  | 137,4 |
| CIMT+G-CSF | V305-17_3 | 30 | 12 | 150,9 |
| CIMT+G-CSF | V305-18_1 | 30 | 13 | 168,4 |
| CIMT+G-CSF | V305-18_2 | 30 | 10 | 142,2 |
| CIMT+G-CSF | V305-18_3 | 30 | 7  | 106,4 |
| CIMT+G-CSF | V305-18_4 | 30 | 5  | 76,6  |
| CIMT+G-CSF | V305-19_1 | 30 | 5  | 76,2  |
| CIMT/G-CSF | V306-16_1 | 30 | 11 | 142,9 |
| CIMT/G-CSF | V306-16_2 | 30 | 10 | 153,8 |
| CIMT/G-CSF | V306-17_1 | 30 | 11 | 168,2 |
| CIMT/G-CSF | V306-17_2 | 30 | 16 | 136,9 |
| CIMT/G-CSF | V306-17_3 | 30 | 14 | 179,2 |
| CIMT/G-CSF | V306-17_4 | 30 | 13 | 178,1 |
| CIMT/G-CSF | V306-17_5 | 30 | 10 | 138,6 |
| CIMT/G-CSF | V311-16_1 | 30 | 21 | 270,9 |
| CIMT/G-CSF | V311-17_1 | 30 | 19 | 234,8 |
| CIMT/G-CSF | V311-17_2 | 30 | 11 | 143,1 |
| CIMT/G-CSF | V311-19_1 | 30 | 8  | 94,4  |
| CIMT/G-CSF | V311-20_1 | 30 | 19 | 267   |
| CIMT/G-CSF | V311-20_2 | 30 | 7  | 104,2 |
| CIMT/G-CSF | V311-20_3 | 30 | 7  | 83,4  |
| CIMT/G-CSF | V313-14_1 | 30 | 8  | 68,1  |
| CIMT/G-CSF | V313-15_1 | 30 | 8  | 113,2 |
| CIMT/G-CSF | V313-15_2 | 30 | 13 | 185,3 |
| CIMT/G-CSF | V313-17_1 | 30 | 11 | 137,9 |
| CIMT/G-CSF | V313-17_2 | 30 | 3  | 45,2  |
| CIMT/G-CSF | V313-17_3 | 30 | 2  | 45,4  |
| CIMT/G-CSF | V313-19_1 | 30 | 7  | 103,2 |
| CIMT/G-CSF | V314-16_1 | 30 | 8  | 124,1 |
| CIMT/G-CSF | V314-16_2 | 30 | 5  | 68,7  |
| CIMT/G-CSF | V314-17_1 | 30 | 12 | 177,4 |
| CIMT/G-CSF | V314-17_2 | 30 | 4  | 76,5  |
| CIMT/G-CSF | V314-17_3 | 30 | 12 | 167,9 |
| CIMT/G-CSF | V314-18_1 | 30 | 11 | 146,4 |
| CIMT/G-CSF | V314-18_2 | 30 | 10 | 164,3 |
| CIMT/G-CSF | V315-11_1 | 30 | 6  | 89,6  |
| CIMT/G-CSF | V315-11_2 | 30 | 12 | 169,3 |
| CIMT/G-CSF | V315-13_1 | 30 | 6  | 86,9  |
| CIMT/G-CSF | V315-13_2 | 30 | 14 | 180,3 |
| CIMT/G-CSF | V315-14_1 | 30 | 9  | 105,2 |
| CIMT/G-CSF | V315-14_2 | 30 | 10 | 128,2 |
| CIMT/G-CSF | V315-14_3 | 30 | 14 | 176,5 |
| G-CSF      | V220-9_1  | 30 | 17 | 250,9 |
| G-CSF      | V220-11_1 | 30 | 9  | 109,6 |
| G-CSF      | V220-12_1 | 30 | 8  | 145,3 |
| G-CSF      | V220-16_1 | 30 | 0  | 14,5  |
| G-CSF      | V220-16_2 | 30 | 6  | 123,8 |
| G-CSF      | V220-17_1 | 30 | 14 | 109   |

|       |           |    |    |       |
|-------|-----------|----|----|-------|
| G-CSF | V220-18_1 | 30 | 8  | 98,5  |
| G-CSF | V221-2_1  | 30 | 13 | 158,5 |
| G-CSF | V221-4_1  | 30 | 6  | 89,5  |
| G-CSF | V221-5_1  | 30 | 9  | 134,2 |
| G-CSF | V221-6_1  | 30 | 9  | 71,7  |
| G-CSF | V221-7_1  | 30 | 7  | 63,7  |
| G-CSF | V221-7_2  | 30 | 15 | 161,8 |
| G-CSF | V221-11_1 | 30 | 4  | 41,5  |
| G-CSF | V221-13_1 | 30 | 21 | 245,7 |
| G-CSF | V221-15_1 | 30 | 6  | 68,5  |
| G-CSF | V221-20_1 | 30 | 11 | 156,6 |
| G-CSF | V222-19_1 | 30 | 10 | 133,8 |
| G-CSF | V222-19_2 | 30 | 8  | 133,4 |
| G-CSF | V222-20_1 | 30 | 7  | 87,9  |
| G-CSF | V222-20_2 | 30 | 6  | 83,6  |
| G-CSF | V222-21_1 | 30 | 11 | 168   |
| G-CSF | V222-22_1 | 30 | 13 | 119   |
| G-CSF | V222-22_2 | 30 | 17 | 198,8 |
| G-CSF | V222-23_1 | 30 | 10 | 112,3 |
| G-CSF | V222-24_1 | 30 | 9  | 113,8 |
| G-CSF | V301-18_1 | 30 | 13 | 208,9 |
| G-CSF | V301-18_2 | 30 | 7  | 99,7  |
| G-CSF | V301-18_3 | 30 | 8  | 96,7  |
| G-CSF | V301-19_1 | 30 | 7  | 83,6  |
| G-CSF | V301-19_2 | 30 | 10 | 139,1 |
| G-CSF | V301-20_1 | 30 | 11 | 159,9 |
| G-CSF | V301-20_2 | 30 | 13 | 181,2 |
| G-CSF | V302-15_1 | 30 | 12 | 160,1 |
| G-CSF | V302-15_2 | 30 | 10 | 180,4 |
| G-CSF | V302-15_3 | 30 | 7  | 96    |
| G-CSF | V302-16_1 | 30 | 8  | 72,3  |
| G-CSF | V302-16_2 | 30 | 4  | 50,8  |
| G-CSF | V302-16_3 | 30 | 8  | 106   |
| G-CSF | V302-16_4 | 30 | 11 | 108,3 |
| G-CSF | V302-17_1 | 30 | 14 | 150,6 |
| G-CSF | V302-17_2 | 30 | 11 | 158,6 |
| G-CSF | V302-17_3 | 30 | 9  | 92,6  |
| G-CSF | V303-15_1 | 30 | 6  | 109,3 |
| G-CSF | V303-15_2 | 30 | 11 | 96    |
| G-CSF | V303-15_3 | 30 | 9  | 25    |
| G-CSF | V303-16_1 | 30 | 12 | 121,1 |
| G-CSF | V303-16_2 | 30 | 9  | 122,5 |
| G-CSF | V303-16_3 | 30 | 14 | 180,8 |
| G-CSF | V303-17_1 | 30 | 12 | 158,3 |

#### basilar dendrite Sholl 40 $\mu$ m

| Group   | number    | Radius( $\mu$ m) | Intersections | Length( $\mu$ m) |
|---------|-----------|------------------|---------------|------------------|
| Control | V215-10_1 | 40               | 7             | 100              |
| Control | V215-10_2 | 40               | 18            | 250,8            |
| Control | V215-11_1 | 40               | 11            | 147,2            |
| Control | V215-12_1 | 40               | 9             | 166,8            |
| Control | V215-12_2 | 40               | 16            | 246,1            |
| Control | V215-13_1 | 40               | 12            | 187,7            |
| Control | V215-15_1 | 40               | 5             | 68,1             |

|         |           |    |    |       |
|---------|-----------|----|----|-------|
| Control | V215-15_2 | 40 | 7  | 94,2  |
| Control | V215-16_1 | 40 | 8  | 120,5 |
| Control | V215-18_1 | 40 | 7  | 106,1 |
| Control | V216-11_1 | 40 | 9  | 109,8 |
| Control | V216-12_1 | 40 | 9  | 121,2 |
| Control | V216-13_1 | 40 | 5  | 95,2  |
| Control | V216-14_1 | 40 | 10 | 126,6 |
| Control | V216-14_2 | 40 | 8  | 123,7 |
| Control | V216-16_1 | 40 | 3  | 83,6  |
| Control | V216-16_2 | 40 | 8  | 95,5  |
| Control | V216-17_1 | 40 | 8  | 110,2 |
| Control | V216-18_1 | 40 | 5  | 84,7  |
| Control | V216-18_2 | 40 | 9  | 125,7 |
| Control | V219-6_1  | 40 | 11 | 150,8 |
| Control | V219-11_1 | 40 | 15 | 213,8 |
| Control | V219-12_1 | 40 | 12 | 194,1 |
| Control | V219-13_1 | 40 | 12 | 193,8 |
| Control | V219-13_2 | 40 | 8  | 125,8 |
| Control | V219-14_1 | 40 | 6  | 83,7  |
| Control | V219-14_2 | 40 | 19 | 235,7 |
| Control | V219-16_1 | 40 | 8  | 128,4 |
| Control | V297-19_1 | 40 | 21 | 306,9 |
| Control | V297-19_2 | 40 | 13 | 174,7 |
| Control | V297-20_1 | 40 | 9  | 153,4 |
| Control | V297-20_2 | 40 | 4  | 82,5  |
| Control | V297-20_3 | 40 | 10 | 126,2 |
| Control | V297-22_1 | 40 | 16 | 214,7 |
| Control | V297-22_2 | 40 | 8  | 101,5 |
| Control | V298-15_1 | 40 | 17 | 190,2 |
| Control | V298-16_1 | 40 | 8  | 134,2 |
| Control | V298-16_2 | 40 | 11 | 184,8 |
| Control | V298-16_3 | 40 | 6  | 86,1  |
| Control | V298-17_1 | 40 | 4  | 51,3  |
| Control | V298-17_2 | 40 | 12 | 156,3 |
| Control | V298-17_3 | 40 | 15 | 199,7 |
| Control | V308-17_1 | 40 | 10 | 165,9 |
| Control | V308-17_2 | 40 | 16 | 193,1 |
| Control | V308-17_3 | 40 | 12 | 197,9 |
| Control | V308-17_4 | 40 | 10 | 169,1 |
| Control | V308-18_1 | 40 | 16 | 215,8 |
| Control | V308-18_2 | 40 | 9  | 173   |
| Control | V308-18_3 | 40 | 15 | 182,7 |
| CIMT    | V211-10_1 | 40 | 23 | 345,7 |
| CIMT    | V211-10_2 | 40 | 10 | 136,4 |
| CIMT    | V211-11_1 | 40 | 6  | 76,2  |
| CIMT    | V211-11_2 | 40 | 6  | 184,1 |
| CIMT    | V211-12_1 | 40 | 14 | 213,9 |
| CIMT    | V211-13_1 | 40 | 8  | 115,6 |
| CIMT    | V211-13_2 | 40 | 15 | 222,5 |
| CIMT    | V211-15_1 | 40 | 10 | 143,5 |
| CIMT    | V211-15_2 | 40 | 13 | 170,7 |
| CIMT    | V211-16_1 | 40 | 11 | 171,9 |
| CIMT    | V212-14_1 | 40 | 12 | 157   |
| CIMT    | V212-14_2 | 40 | 11 | 126,9 |
| CIMT    | V212-15_1 | 40 | 15 | 181,6 |
| CIMT    | V212-18_1 | 40 | 12 | 168,3 |



|            |           |    |    |       |
|------------|-----------|----|----|-------|
| CIMT       | V212-21_1 | 40 | 9  | 99,5  |
| CIMT       | V212-21_2 | 40 | 15 | 200   |
| CIMT       | V212-22_1 | 40 | 9  | 124,9 |
| CIMT       | V212-23_1 | 40 | 9  | 138,5 |
| CIMT       | V212-23_2 | 40 | 7  | 103,9 |
| CIMT       | V212-24_1 | 40 | 4  | 52,6  |
| CIMT       | V218-9_1  | 40 | 8  | 104,8 |
| CIMT       | V218-10_1 | 40 | 13 | 159,3 |
| CIMT       | V218-11_1 | 40 | 14 | 203,8 |
| CIMT       | V218-12_1 | 40 | 15 | 211,7 |
| CIMT       | V218-12_2 | 40 | 8  | 107,1 |
| CIMT       | V218-13_1 | 40 | 9  | 202,1 |
| CIMT       | V218-15_1 | 40 | 11 | 153,8 |
| CIMT       | V218-17_1 | 40 | 10 | 152   |
| CIMT       | V299-14_1 | 40 | 9  | 125,4 |
| CIMT       | V299-15_1 | 40 | 4  | 99    |
| CIMT       | V299-15_2 | 40 | 3  | 75,9  |
| CIMT       | V299-16_1 | 40 | 7  | 151   |
| CIMT       | V299-16_2 | 40 | 8  | 124,5 |
| CIMT       | V299-17_1 | 40 | 16 | 212,5 |
| CIMT       | V299-17_2 | 40 | 7  | 151,9 |
| CIMT       | V300-16_1 | 40 | 9  | 128,8 |
| CIMT       | V300-18_1 | 40 | 11 | 149,8 |
| CIMT       | V300-18_2 | 40 | 12 | 129,4 |
| CIMT       | V300-20_1 | 40 | 10 | 141,2 |
| CIMT       | V300-22_1 | 40 | 14 | 169,6 |
| CIMT       | V300-23_1 | 40 | 7  | 99,4  |
| CIMT       | V300-23_2 | 40 | 6  | 96,8  |
| CIMT       | V309-15_1 | 40 | 9  | 103,7 |
| CIMT       | V309-15_2 | 40 | 11 | 133   |
| CIMT       | V309-16_1 | 40 | 13 | 251,7 |
| CIMT       | V309-16_2 | 40 | 7  | 108,2 |
| CIMT       | V309-16_3 | 40 | 14 | 191,3 |
| CIMT       | V309-17_1 | 40 | 10 | 134   |
| CIMT       | V309-17_2 | 40 | 11 | 142   |
| CIMT+G-CSF | V213-13_1 | 40 | 5  | 58,2  |
| CIMT+G-CSF | V213-16_1 | 40 | 4  | 63,3  |
| CIMT+G-CSF | V213-17_1 | 40 | 10 | 122,1 |
| CIMT+G-CSF | V213-17_2 | 40 | 15 | 201,6 |
| CIMT+G-CSF | V213-18_1 | 40 | 19 | 299,6 |
| CIMT+G-CSF | V213-18_2 | 40 | 6  | 86,3  |
| CIMT+G-CSF | V213-19_1 | 40 | 12 | 124,1 |
| CIMT+G-CSF | V213-19_2 | 40 | 7  | 108,2 |
| CIMT+G-CSF | V213-20_1 | 40 | 8  | 93,3  |
| CIMT+G-CSF | V213-22_1 | 40 | 12 | 134,6 |
| CIMT+G-CSF | V213-23_1 | 40 | 9  | 153,9 |
| CIMT+G-CSF | V214-14_1 | 40 | 15 | 209,2 |
| CIMT+G-CSF | V214-17_1 | 40 | 10 | 141,3 |
| CIMT+G-CSF | V214-18_1 | 40 | 12 | 156,5 |
| CIMT+G-CSF | V214-19_1 | 40 | 7  | 97,3  |
| CIMT+G-CSF | V214-19_2 | 40 | 8  | 92,6  |
| CIMT+G-CSF | V214-20_1 | 40 | 12 | 157,8 |
| CIMT+G-CSF | V214-21_1 | 40 | 7  | 121,8 |
| CIMT+G-CSF | V217-1_1  | 40 | 17 | 219,6 |
| CIMT+G-CSF | V217-2_1  | 40 | 14 | 231,6 |
| CIMT+G-CSF | V217-4_1  | 40 | 16 | 231,6 |

|            |           |    |    |       |
|------------|-----------|----|----|-------|
| CIMT+G-CSF | V217-6_1  | 40 | 11 | 199,6 |
| CIMT+G-CSF | V217-6_3  | 40 | 14 | 222,9 |
| CIMT+G-CSF | V217-8_1  | 40 | 15 | 236,6 |
| CIMT+G-CSF | V217-8_4  | 40 | 7  | 116,7 |
| CIMT+G-CSF | V217-10_1 | 40 | 9  | 130,2 |
| CIMT+G-CSF | V217-11_1 | 40 | 15 | 180,1 |
| CIMT+G-CSF | V304-16_1 | 40 | 3  | 59,2  |
| CIMT+G-CSF | V304-17_1 | 40 | 13 | 171   |
| CIMT+G-CSF | V304-17_2 | 40 | 3  | 41,2  |
| CIMT+G-CSF | V304-17_3 | 40 | 11 | 139,1 |
| CIMT+G-CSF | V304-17_4 | 40 | 7  | 98,2  |
| CIMT+G-CSF | V304-19_1 | 40 | 3  | 51,4  |
| CIMT+G-CSF | V304-19_2 | 40 | 5  | 92,2  |
| CIMT+G-CSF | V305-17_1 | 40 | 5  | 85,7  |
| CIMT+G-CSF | V305-17_2 | 40 | 7  | 155,6 |
| CIMT+G-CSF | V305-17_3 | 40 | 10 | 162   |
| CIMT+G-CSF | V305-18_1 | 40 | 14 | 182,1 |
| CIMT+G-CSF | V305-18_2 | 40 | 7  | 118,3 |
| CIMT+G-CSF | V305-18_3 | 40 | 6  | 98,7  |
| CIMT+G-CSF | V305-18_4 | 40 | 6  | 167,7 |
| CIMT+G-CSF | V305-19_1 | 40 | 4  | 85,9  |
| CIMT/G-CSF | V306-16_1 | 40 | 11 | 130,5 |
| CIMT/G-CSF | V306-16_2 | 40 | 8  | 106,7 |
| CIMT/G-CSF | V306-17_1 | 40 | 14 | 201,2 |
| CIMT/G-CSF | V306-17_2 | 40 | 13 | 200,5 |
| CIMT/G-CSF | V306-17_3 | 40 | 10 | 166,2 |
| CIMT/G-CSF | V306-17_4 | 40 | 10 | 182,7 |
| CIMT/G-CSF | V306-17_5 | 40 | 5  | 143,5 |
| CIMT/G-CSF | V311-16_1 | 40 | 19 | 280,6 |
| CIMT/G-CSF | V311-17_1 | 40 | 17 | 309,7 |
| CIMT/G-CSF | V311-17_2 | 40 | 8  | 123,1 |
| CIMT/G-CSF | V311-19_1 | 40 | 11 | 184,6 |
| CIMT/G-CSF | V311-20_1 | 40 | 20 | 312,9 |
| CIMT/G-CSF | V311-20_2 | 40 | 7  | 91,6  |
| CIMT/G-CSF | V311-20_3 | 40 | 7  | 80,5  |
| CIMT/G-CSF | V313-14_1 | 40 | 7  | 105,5 |
| CIMT/G-CSF | V313-15_1 | 40 | 3  | 60,8  |
| CIMT/G-CSF | V313-15_2 | 40 | 8  | 279,9 |
| CIMT/G-CSF | V313-17_1 | 40 | 11 | 141,6 |
| CIMT/G-CSF | V313-17_2 | 40 | 7  | 89    |
| CIMT/G-CSF | V313-17_3 | 40 | 2  | 34,7  |
| CIMT/G-CSF | V313-19_1 | 40 | 6  | 75,1  |
| CIMT/G-CSF | V314-16_1 | 40 | 8  | 113,6 |
| CIMT/G-CSF | V314-16_2 | 40 | 5  | 82,1  |
| CIMT/G-CSF | V314-17_1 | 40 | 10 | 139,2 |
| CIMT/G-CSF | V314-17_2 | 40 | 1  | 27,2  |
| CIMT/G-CSF | V314-17_3 | 40 | 11 | 151,8 |
| CIMT/G-CSF | V314-18_1 | 40 | 12 | 152,8 |
| CIMT/G-CSF | V314-18_2 | 40 | 11 | 158,2 |
| CIMT/G-CSF | V315-11_1 | 40 | 7  | 79,9  |
| CIMT/G-CSF | V315-11_2 | 40 | 15 | 173   |
| CIMT/G-CSF | V315-13_1 | 40 | 10 | 132   |
| CIMT/G-CSF | V315-13_2 | 40 | 18 | 214,3 |
| CIMT/G-CSF | V315-14_1 | 40 | 8  | 124   |
| CIMT/G-CSF | V315-14_2 | 40 | 14 | 197,3 |
| CIMT/G-CSF | V315-14_3 | 40 | 15 | 192,1 |

|       |           |    |    |       |
|-------|-----------|----|----|-------|
| G-CSF | V220-9_1  | 40 | 15 | 207,5 |
| G-CSF | V220-11_1 | 40 | 5  | 71,8  |
| G-CSF | V220-12_1 | 40 | 8  | 127   |
| G-CSF | V220-16_1 | 40 | 1  | 1,7   |
| G-CSF | V220-16_2 | 40 | 7  | 78,8  |
| G-CSF | V220-17_1 | 40 | 14 | 197,3 |
| G-CSF | V220-18_1 | 40 | 7  | 94,2  |
| G-CSF | V221-2_1  | 40 | 14 | 180,8 |
| G-CSF | V221-4_1  | 40 | 4  | 51,9  |
| G-CSF | V221-5_1  | 40 | 3  | 64,7  |
| G-CSF | V221-6_1  | 40 | 17 | 249,3 |
| G-CSF | V221-7_1  | 40 | 7  | 99,9  |
| G-CSF | V221-7_2  | 40 | 15 | 216,7 |
| G-CSF | V221-11_1 | 40 | 5  | 63,4  |
| G-CSF | V221-13_1 | 40 | 26 | 306,4 |
| G-CSF | V221-15_1 | 40 | 5  | 84    |
| G-CSF | V221-20_1 | 40 | 15 | 209,2 |
| G-CSF | V222-19_1 | 40 | 10 | 116,3 |
| G-CSF | V222-19_2 | 40 | 7  | 90,8  |
| G-CSF | V222-20_1 | 40 | 5  | 82    |
| G-CSF | V222-20_2 | 40 | 8  | 81,2  |
| G-CSF | V222-21_1 | 40 | 14 | 179,2 |
| G-CSF | V222-22_1 | 40 | 11 | 276,6 |
| G-CSF | V222-22_2 | 40 | 20 | 260,8 |
| G-CSF | V222-23_1 | 40 | 11 | 132,2 |
| G-CSF | V222-24_1 | 40 | 15 | 162,1 |
| G-CSF | V301-18_1 | 40 | 12 | 200,9 |
| G-CSF | V301-18_2 | 40 | 8  | 128,5 |
| G-CSF | V301-18_3 | 40 | 7  | 84,3  |
| G-CSF | V301-19_1 | 40 | 8  | 99,1  |
| G-CSF | V301-19_2 | 40 | 11 | 141,5 |
| G-CSF | V301-20_1 | 40 | 9  | 128,1 |
| G-CSF | V301-20_2 | 40 | 14 | 219,1 |
| G-CSF | V302-15_1 | 40 | 8  | 114,3 |
| G-CSF | V302-15_2 | 40 | 11 | 154,8 |
| G-CSF | V302-15_3 | 40 | 8  | 110,3 |
| G-CSF | V302-16_1 | 40 | 4  | 134,4 |
| G-CSF | V302-16_2 | 40 | 2  | 44,8  |
| G-CSF | V302-16_3 | 40 | 10 | 141,6 |
| G-CSF | V302-16_4 | 40 | 9  | 140,2 |
| G-CSF | V302-17_1 | 40 | 18 | 234,9 |
| G-CSF | V302-17_2 | 40 | 9  | 128   |
| G-CSF | V302-17_3 | 40 | 8  | 120,3 |
| G-CSF | V303-15_1 | 40 | 5  | 55,5  |
| G-CSF | V303-15_2 | 40 | 13 | 159,2 |
| G-CSF | V303-15_3 | 40 | 8  | 139,9 |
| G-CSF | V303-16_1 | 40 | 13 | 201,3 |
| G-CSF | V303-16_2 | 40 | 10 | 137,7 |
| G-CSF | V303-16_3 | 40 | 14 | 202,3 |
| G-CSF | V303-17_1 | 40 | 14 | 170,4 |

**basilar dendrite Sholl 50 $\mu$ m**

| <b>Group</b> | <b>number</b> | <b>Radius(<math>\mu</math>m)</b> | <b>Intersections</b> | <b>Length(<math>\mu</math>m)</b> |
|--------------|---------------|----------------------------------|----------------------|----------------------------------|
| Control      | V215-10_1     | 50                               | 4                    | 66,7                             |
| Control      | V215-10_2     | 50                               | 21                   | 269,1                            |
| Control      | V215-11_1     | 50                               | 8                    | 132,7                            |
| Control      | V215-12_1     | 50                               | 6                    | 110,3                            |
| Control      | V215-12_2     | 50                               | 14                   | 176,9                            |
| Control      | V215-13_1     | 50                               | 10                   | 151,3                            |
| Control      | V215-15_1     | 50                               | 3                    | 52,6                             |
| Control      | V215-15_2     | 50                               | 8                    | 105,6                            |
| Control      | V215-16_1     | 50                               | 7                    | 109,5                            |
| Control      | V215-18_1     | 50                               | 6                    | 82,8                             |
| Control      | V216-11_1     | 50                               | 8                    | 108,1                            |
| Control      | V216-12_1     | 50                               | 8                    | 134,1                            |
| Control      | V216-13_1     | 50                               | 2                    | 64,7                             |
| Control      | V216-14_1     | 50                               | 10                   | 138,2                            |
| Control      | V216-14_2     | 50                               | 5                    | 71,4                             |
| Control      | V216-16_1     | 50                               | 0                    | 9,4                              |
| Control      | V216-16_2     | 50                               | 7                    | 99,1                             |
| Control      | V216-17_1     | 50                               | 6                    | 103,5                            |
| Control      | V216-18_1     | 50                               | 2                    | 68,8                             |
| Control      | V216-18_2     | 50                               | 8                    | 113                              |
| Control      | V219-6_1      | 50                               | 11                   | 158,2                            |
| Control      | V219-11_1     | 50                               | 15                   | 225,8                            |
| Control      | V219-12_1     | 50                               | 12                   | 175,8                            |
| Control      | V219-13_1     | 50                               | 9                    | 197,5                            |
| Control      | V219-13_2     | 50                               | 4                    | 72,6                             |
| Control      | V219-14_1     | 50                               | 5                    | 69,4                             |
| Control      | V219-14_2     | 50                               | 18                   | 261,9                            |
| Control      | V219-16_1     | 50                               | 9                    | 108,4                            |
| Control      | V297-19_1     | 50                               | 15                   | 231,5                            |
| Control      | V297-19_2     | 50                               | 7                    | 142,5                            |
| Control      | V297-20_1     | 50                               | 9                    | 114,5                            |
| Control      | V297-20_2     | 50                               | 4                    | 79,4                             |
| Control      | V297-20_3     | 50                               | 10                   | 129,7                            |
| Control      | V297-22_1     | 50                               | 13                   | 204,9                            |
| Control      | V297-22_2     | 50                               | 4                    | 88,9                             |
| Control      | V298-15_1     | 50                               | 13                   | 178,1                            |
| Control      | V298-16_1     | 50                               | 6                    | 85,2                             |
| Control      | V298-16_2     | 50                               | 6                    | 105,5                            |
| Control      | V298-16_3     | 50                               | 3                    | 66,4                             |
| Control      | V298-17_1     | 50                               | 5                    | 52,1                             |
| Control      | V298-17_2     | 50                               | 12                   | 147                              |
| Control      | V298-17_3     | 50                               | 13                   | 185,1                            |
| Control      | V308-17_1     | 50                               | 7                    | 159,3                            |
| Control      | V308-17_2     | 50                               | 15                   | 260                              |
| Control      | V308-17_3     | 50                               | 11                   | 194,7                            |
| Control      | V308-17_4     | 50                               | 10                   | 162,7                            |
| Control      | V308-18_1     | 50                               | 13                   | 246,3                            |
| Control      | V308-18_2     | 50                               | 10                   | 187,5                            |
| Control      | V308-18_3     | 50                               | 12                   | 206,2                            |
| CIMT         | V211-10_1     | 50                               | 23                   | 324,3                            |
| CIMT         | V211-10_2     | 50                               | 11                   | 135,4                            |
| CIMT         | V211-11_1     | 50                               | 5                    | 60,8                             |
| CIMT         | V211-11_2     | 50                               | 3                    | 79,7                             |

|            |           |    |    |       |
|------------|-----------|----|----|-------|
| CIMT       | V211-12_1 | 50 | 13 | 196,6 |
| CIMT       | V211-13_1 | 50 | 6  | 78,5  |
| CIMT       | V211-13_2 | 50 | 15 | 224,6 |
| CIMT       | V211-15_1 | 50 | 8  | 115,1 |
| CIMT       | V211-15_2 | 50 | 11 | 152,3 |
| CIMT       | V211-16_1 | 50 | 10 | 126,4 |
| CIMT       | V212-14_1 | 50 | 12 | 164   |
| CIMT       | V212-14_2 | 50 | 13 | 151,8 |
| CIMT       | V212-15_1 | 50 | 17 | 215,6 |
| CIMT       | V212-18_1 | 50 | 10 | 169,6 |
| CIMT       | V212-21_1 | 50 | 7  | 98    |
| CIMT       | V212-21_2 | 50 | 17 | 206,8 |
| CIMT       | V212-22_1 | 50 | 8  | 141,1 |
| CIMT       | V212-23_1 | 50 | 9  | 124,3 |
| CIMT       | V212-23_2 | 50 | 16 | 157   |
| CIMT       | V212-24_1 | 50 | 3  | 50,6  |
| CIMT       | V218-9_1  | 50 | 7  | 118,8 |
| CIMT       | V218-10_1 | 50 | 13 | 203,9 |
| CIMT       | V218-11_1 | 50 | 15 | 228,7 |
| CIMT       | V218-12_1 | 50 | 13 | 204,1 |
| CIMT       | V218-12_2 | 50 | 6  | 107,8 |
| CIMT       | V218-13_1 | 50 | 5  | 131,1 |
| CIMT       | V218-15_1 | 50 | 9  | 151,5 |
| CIMT       | V218-17_1 | 50 | 7  | 118,6 |
| CIMT       | V299-14_1 | 50 | 7  | 120,3 |
| CIMT       | V299-15_1 | 50 | 0  | 14    |
| CIMT       | V299-15_2 | 50 | 1  | 20,3  |
| CIMT       | V299-16_1 | 50 | 7  | 115,8 |
| CIMT       | V299-16_2 | 50 | 7  | 117,6 |
| CIMT       | V299-17_1 | 50 | 16 | 228,7 |
| CIMT       | V299-17_2 | 50 | 7  | 88,6  |
| CIMT       | V300-16_1 | 50 | 10 | 148,6 |
| CIMT       | V300-18_1 | 50 | 8  | 120,2 |
| CIMT       | V300-18_2 | 50 | 13 | 150,8 |
| CIMT       | V300-20_1 | 50 | 8  | 97,5  |
| CIMT       | V300-22_1 | 50 | 15 | 235,2 |
| CIMT       | V300-23_1 | 50 | 9  | 143,7 |
| CIMT       | V300-23_2 | 50 | 4  | 63    |
| CIMT       | V309-15_1 | 50 | 6  | 102,8 |
| CIMT       | V309-15_2 | 50 | 10 | 144,6 |
| CIMT       | V309-16_1 | 50 | 12 | 198,1 |
| CIMT       | V309-16_2 | 50 | 6  | 104,1 |
| CIMT       | V309-16_3 | 50 | 12 | 170,1 |
| CIMT       | V309-17_1 | 50 | 9  | 137,3 |
| CIMT       | V309-17_2 | 50 | 11 | 156   |
| CIMT+G-CSF | V213-13_1 | 50 | 4  | 53,6  |
| CIMT+G-CSF | V213-16_1 | 50 | 3  | 38,6  |
| CIMT+G-CSF | V213-17_1 | 50 | 9  | 120,9 |
| CIMT+G-CSF | V213-17_2 | 50 | 11 | 180,1 |
| CIMT+G-CSF | V213-18_1 | 50 | 16 | 258,3 |
| CIMT+G-CSF | V213-18_2 | 50 | 5  | 63,3  |
| CIMT+G-CSF | V213-19_1 | 50 | 13 | 227,1 |
| CIMT+G-CSF | V213-19_2 | 50 | 6  | 72,7  |
| CIMT+G-CSF | V213-20_1 | 50 | 7  | 90,9  |
| CIMT+G-CSF | V213-22_1 | 50 | 11 | 156   |
| CIMT+G-CSF | V213-23_1 | 50 | 7  | 100,3 |

|            |           |    |    |       |
|------------|-----------|----|----|-------|
| CIMT+G-CSF | V214-14_1 | 50 | 14 | 190,7 |
| CIMT+G-CSF | V214-17_1 | 50 | 11 | 132,1 |
| CIMT+G-CSF | V214-18_1 | 50 | 13 | 191,5 |
| CIMT+G-CSF | V214-19_1 | 50 | 6  | 81,3  |
| CIMT+G-CSF | V214-19_2 | 50 | 10 | 104,8 |
| CIMT+G-CSF | V214-20_1 | 50 | 13 | 133,3 |
| CIMT+G-CSF | V214-21_1 | 50 | 8  | 94,8  |
| CIMT+G-CSF | V217-1_1  | 50 | 17 | 232,7 |
| CIMT+G-CSF | V217-2_1  | 50 | 15 | 215   |
| CIMT+G-CSF | V217-4_1  | 50 | 24 | 271,9 |
| CIMT+G-CSF | V217-6_1  | 50 | 12 | 204   |
| CIMT+G-CSF | V217-6_3  | 50 | 16 | 213   |
| CIMT+G-CSF | V217-8_1  | 50 | 10 | 213,2 |
| CIMT+G-CSF | V217-8_4  | 50 | 7  | 93,6  |
| CIMT+G-CSF | V217-10_1 | 50 | 6  | 127,4 |
| CIMT+G-CSF | V217-11_1 | 50 | 15 | 220,7 |
| CIMT+G-CSF | V304-16_1 | 50 | 1  | 40,7  |
| CIMT+G-CSF | V304-17_1 | 50 | 11 | 154,8 |
| CIMT+G-CSF | V304-17_2 | 50 | 3  | 37,5  |
| CIMT+G-CSF | V304-17_3 | 50 | 9  | 154,9 |
| CIMT+G-CSF | V304-17_4 | 50 | 8  | 104,4 |
| CIMT+G-CSF | V304-19_1 | 50 | 3  | 37,1  |
| CIMT+G-CSF | V304-19_2 | 50 | 6  | 82,9  |
| CIMT+G-CSF | V305-17_1 | 50 | 2  | 40,5  |
| CIMT+G-CSF | V305-17_2 | 50 | 7  | 92,3  |
| CIMT+G-CSF | V305-17_3 | 50 | 6  | 85,1  |
| CIMT+G-CSF | V305-18_1 | 50 | 13 | 189,8 |
| CIMT+G-CSF | V305-18_2 | 50 | 6  | 95,2  |
| CIMT+G-CSF | V305-18_3 | 50 | 2  | 37,7  |
| CIMT+G-CSF | V305-18_4 | 50 | 5  | 80,8  |
| CIMT+G-CSF | V305-19_1 | 50 | 1  | 19,9  |
| CIMT/G-CSF | V306-16_1 | 50 | 8  | 126,6 |
| CIMT/G-CSF | V306-16_2 | 50 | 7  | 88,5  |
| CIMT/G-CSF | V306-17_1 | 50 | 10 | 166,5 |
| CIMT/G-CSF | V306-17_2 | 50 | 13 | 208,9 |
| CIMT/G-CSF | V306-17_3 | 50 | 10 | 118,9 |
| CIMT/G-CSF | V306-17_4 | 50 | 7  | 121,8 |
| CIMT/G-CSF | V306-17_5 | 50 | 3  | 62,7  |
| CIMT/G-CSF | V311-16_1 | 50 | 18 | 237,2 |
| CIMT/G-CSF | V311-17_1 | 50 | 18 | 245,3 |
| CIMT/G-CSF | V311-17_2 | 50 | 10 | 125,8 |
| CIMT/G-CSF | V311-19_1 | 50 | 8  | 134,3 |
| CIMT/G-CSF | V311-20_1 | 50 | 18 | 264,3 |
| CIMT/G-CSF | V311-20_2 | 50 | 6  | 79,9  |
| CIMT/G-CSF | V311-20_3 | 50 | 6  | 92,3  |
| CIMT/G-CSF | V313-14_1 | 50 | 7  | 88,8  |
| CIMT/G-CSF | V313-15_1 | 50 | 1  | 14    |
| CIMT/G-CSF | V313-15_2 | 50 | 5  | 122   |
| CIMT/G-CSF | V313-17_1 | 50 | 12 | 134,4 |
| CIMT/G-CSF | V313-17_2 | 50 | 4  | 109,5 |
| CIMT/G-CSF | V313-17_3 | 50 | 1  | 14,4  |
| CIMT/G-CSF | V313-19_1 | 50 | 3  | 45,1  |
| CIMT/G-CSF | V314-16_1 | 50 | 5  | 87    |
| CIMT/G-CSF | V314-16_2 | 50 | 10 | 116,5 |
| CIMT/G-CSF | V314-17_1 | 50 | 10 | 122,3 |
| CIMT/G-CSF | V314-17_2 | 50 | 0  | 8,7   |

|            |           |    |    |       |
|------------|-----------|----|----|-------|
| CIMT/G-CSF | V314-17_3 | 50 | 10 | 132,3 |
| CIMT/G-CSF | V314-18_1 | 50 | 6  | 124,5 |
| CIMT/G-CSF | V314-18_2 | 50 | 12 | 143   |
| CIMT/G-CSF | V315-11_1 | 50 | 7  | 140,2 |
| CIMT/G-CSF | V315-11_2 | 50 | 10 | 215   |
| CIMT/G-CSF | V315-13_1 | 50 | 16 | 206,3 |
| CIMT/G-CSF | V315-13_2 | 50 | 17 | 231,6 |
| CIMT/G-CSF | V315-14_1 | 50 | 7  | 89,1  |
| CIMT/G-CSF | V315-14_2 | 50 | 12 | 168   |
| CIMT/G-CSF | V315-14_3 | 50 | 14 | 190,4 |
| G-CSF      | V220-9_1  | 50 | 15 | 189,5 |
| G-CSF      | V220-11_1 | 50 | 2  | 43,3  |
| G-CSF      | V220-12_1 | 50 | 7  | 98    |
| G-CSF      | V220-16_1 | 50 | 5  | 48,5  |
| G-CSF      | V220-16_2 | 50 | 6  | 82,8  |
| G-CSF      | V220-17_1 | 50 | 15 | 206,8 |
| G-CSF      | V220-18_1 | 50 | 7  | 84,5  |
| G-CSF      | V221-2_1  | 50 | 13 | 170,1 |
| G-CSF      | V221-4_1  | 50 | 2  | 41,9  |
| G-CSF      | V221-5_1  | 50 | 1  | 24,2  |
| G-CSF      | V221-6_1  | 50 | 16 | 207,6 |
| G-CSF      | V221-7_1  | 50 | 6  | 86,1  |
| G-CSF      | V221-7_2  | 50 | 18 | 202,5 |
| G-CSF      | V221-11_1 | 50 | 6  | 72,8  |
| G-CSF      | V221-13_1 | 50 | 29 | 352,9 |
| G-CSF      | V221-15_1 | 50 | 3  | 39,4  |
| G-CSF      | V221-20_1 | 50 | 13 | 202,8 |
| G-CSF      | V222-19_1 | 50 | 9  | 109,1 |
| G-CSF      | V222-19_2 | 50 | 4  | 66    |
| G-CSF      | V222-20_1 | 50 | 5  | 91    |
| G-CSF      | V222-20_2 | 50 | 13 | 160,4 |
| G-CSF      | V222-21_1 | 50 | 18 | 247,3 |
| G-CSF      | V222-22_1 | 50 | 9  | 192,3 |
| G-CSF      | V222-22_2 | 50 | 18 | 251,4 |
| G-CSF      | V222-23_1 | 50 | 13 | 149,6 |
| G-CSF      | V222-24_1 | 50 | 19 | 260,6 |
| G-CSF      | V301-18_1 | 50 | 7  | 143,9 |
| G-CSF      | V301-18_2 | 50 | 6  | 103,5 |
| G-CSF      | V301-18_3 | 50 | 5  | 59,6  |
| G-CSF      | V301-19_1 | 50 | 6  | 78,5  |
| G-CSF      | V301-19_2 | 50 | 9  | 125,3 |
| G-CSF      | V301-20_1 | 50 | 9  | 108,5 |
| G-CSF      | V301-20_2 | 50 | 10 | 190,7 |
| G-CSF      | V302-15_1 | 50 | 7  | 91,1  |
| G-CSF      | V302-15_2 | 50 | 9  | 138,5 |
| G-CSF      | V302-15_3 | 50 | 6  | 90,5  |
| G-CSF      | V302-16_1 | 50 | 2  | 41,8  |
| G-CSF      | V302-16_2 | 50 | 0  | 24,3  |
| G-CSF      | V302-16_3 | 50 | 8  | 114,6 |
| G-CSF      | V302-16_4 | 50 | 7  | 123,2 |
| G-CSF      | V302-17_1 | 50 | 18 | 245   |
| G-CSF      | V302-17_2 | 50 | 8  | 100,2 |
| G-CSF      | V302-17_3 | 50 | 9  | 101,2 |
| G-CSF      | V303-15_1 | 50 | 3  | 69,5  |
| G-CSF      | V303-15_2 | 50 | 10 | 195,9 |
| G-CSF      | V303-15_3 | 50 | 13 | 184,6 |

|       |           |    |    |       |
|-------|-----------|----|----|-------|
| G-CSF | V303-16_1 | 50 | 15 | 216,8 |
| G-CSF | V303-16_2 | 50 | 10 | 139,9 |
| G-CSF | V303-16_3 | 50 | 11 | 160,1 |
| G-CSF | V303-17_1 | 50 | 17 | 228,5 |

### basilar dendrite Sholl 60 $\mu$ m

| Group   | number    | Radius( $\mu$ m) | Intersections | Length( $\mu$ m) |
|---------|-----------|------------------|---------------|------------------|
| Control | V215-10_1 | 60               | 3             | 68               |
| Control | V215-10_2 | 60               | 19            | 272,8            |
| Control | V215-11_1 | 60               | 6             | 87               |
| Control | V215-12_1 | 60               | 7             | 101,2            |
| Control | V215-12_2 | 60               | 16            | 189,7            |
| Control | V215-13_1 | 60               | 6             | 109,4            |
| Control | V215-15_1 | 60               | 3             | 34,4             |
| Control | V215-15_2 | 60               | 7             | 90,2             |
| Control | V215-16_1 | 60               | 6             | 90,3             |
| Control | V215-18_1 | 60               | 4             | 56,8             |
| Control | V216-11_1 | 60               | 6             | 96,9             |
| Control | V216-12_1 | 60               | 4             | 70,1             |
| Control | V216-13_1 | 60               | 2             | 22,1             |
| Control | V216-14_1 | 60               | 6             | 86               |
| Control | V216-14_2 | 60               | 5             | 53               |
| Control | V216-16_2 | 60               | 7             | 84,4             |
| Control | V216-17_1 | 60               | 5             | 88,1             |
| Control | V216-18_1 | 60               | 2             | 22,6             |
| Control | V216-18_2 | 60               | 5             | 77               |
| Control | V219-6_1  | 60               | 16            | 230,5            |
| Control | V219-11_1 | 60               | 13            | 245,6            |
| Control | V219-12_1 | 60               | 10            | 140,9            |
| Control | V219-13_1 | 60               | 5             | 134,2            |
| Control | V219-13_2 | 60               | 2             | 45,1             |
| Control | V219-14_1 | 60               | 4             | 68,8             |
| Control | V219-14_2 | 60               | 17            | 286              |
| Control | V219-16_1 | 60               | 8             | 120,3            |
| Control | V297-19_1 | 60               | 16            | 215,3            |
| Control | V297-19_2 | 60               | 4             | 71,4             |
| Control | V297-20_1 | 60               | 6             | 98               |
| Control | V297-20_2 | 60               | 4             | 44               |
| Control | V297-20_3 | 60               | 9             | 123              |
| Control | V297-22_1 | 60               | 13            | 191,3            |
| Control | V297-22_2 | 60               | 2             | 25,8             |
| Control | V298-15_1 | 60               | 15            | 197              |
| Control | V298-16_1 | 60               | 4             | 60,3             |
| Control | V298-16_2 | 60               | 4             | 65,4             |
| Control | V298-16_3 | 60               | 3             | 34,9             |
| Control | V298-17_1 | 60               | 2             | 46,1             |
| Control | V298-17_2 | 60               | 13            | 168,9            |
| Control | V298-17_3 | 60               | 12            | 156,8            |
| Control | V308-17_1 | 60               | 5             | 80,3             |
| Control | V308-17_2 | 60               | 13            | 228,3            |
| Control | V308-17_3 | 60               | 13            | 143,7            |
| Control | V308-17_4 | 60               | 8             | 116,7            |
| Control | V308-18_1 | 60               | 9             | 156,4            |
| Control | V308-18_2 | 60               | 7             | 120,2            |



|            |           |    |    |       |
|------------|-----------|----|----|-------|
| Control    | V308-18_3 | 60 | 10 | 170,6 |
| CIMT       | V211-10_1 | 60 | 25 | 339,2 |
| CIMT       | V211-10_2 | 60 | 7  | 136   |
| CIMT       | V211-11_1 | 60 | 4  | 50,3  |
| CIMT       | V211-11_2 | 60 | 3  | 39    |
| CIMT       | V211-12_1 | 60 | 7  | 140,9 |
| CIMT       | V211-13_1 | 60 | 6  | 73,6  |
| CIMT       | V211-13_2 | 60 | 14 | 221   |
| CIMT       | V211-15_1 | 60 | 6  | 92    |
| CIMT       | V211-15_2 | 60 | 5  | 101,3 |
| CIMT       | V211-16_1 | 60 | 10 | 125   |
| CIMT       | V212-14_1 | 60 | 13 | 167,7 |
| CIMT       | V212-14_2 | 60 | 13 | 158,4 |
| CIMT       | V212-15_1 | 60 | 15 | 199,3 |
| CIMT       | V212-18_1 | 60 | 8  | 149,8 |
| CIMT       | V212-21_1 | 60 | 7  | 103,8 |
| CIMT       | V212-21_2 | 60 | 14 | 196,2 |
| CIMT       | V212-22_1 | 60 | 7  | 97,1  |
| CIMT       | V212-23_1 | 60 | 9  | 115,5 |
| CIMT       | V212-23_2 | 60 | 30 | 345,3 |
| CIMT       | V212-24_1 | 60 | 3  | 35    |
| CIMT       | V218-9_1  | 60 | 5  | 82,2  |
| CIMT       | V218-10_1 | 60 | 12 | 204,8 |
| CIMT       | V218-11_1 | 60 | 15 | 197,9 |
| CIMT       | V218-12_1 | 60 | 13 | 209   |
| CIMT       | V218-12_2 | 60 | 8  | 109,3 |
| CIMT       | V218-13_1 | 60 | 4  | 69,9  |
| CIMT       | V218-15_1 | 60 | 9  | 127,5 |
| CIMT       | V218-17_1 | 60 | 8  | 87,8  |
| CIMT       | V299-14_1 | 60 | 5  | 87,5  |
| CIMT       | V299-15_2 | 60 | 0  | 9,6   |
| CIMT       | V299-16_1 | 60 | 6  | 75,6  |
| CIMT       | V299-16_2 | 60 | 8  | 81,5  |
| CIMT       | V299-17_1 | 60 | 14 | 167,5 |
| CIMT       | V299-17_2 | 60 | 5  | 97,3  |
| CIMT       | V300-16_1 | 60 | 10 | 113,8 |
| CIMT       | V300-18_1 | 60 | 5  | 98,9  |
| CIMT       | V300-18_2 | 60 | 15 | 169   |
| CIMT       | V300-20_1 | 60 | 8  | 86,3  |
| CIMT       | V300-22_1 | 60 | 11 | 164,6 |
| CIMT       | V300-23_1 | 60 | 10 | 159   |
| CIMT       | V300-23_2 | 60 | 4  | 75,3  |
| CIMT       | V309-15_1 | 60 | 4  | 70,8  |
| CIMT       | V309-15_2 | 60 | 5  | 86,3  |
| CIMT       | V309-16_1 | 60 | 13 | 236,5 |
| CIMT       | V309-16_2 | 60 | 3  | 56,8  |
| CIMT       | V309-16_3 | 60 | 11 | 143,8 |
| CIMT       | V309-17_1 | 60 | 7  | 115,1 |
| CIMT       | V309-17_2 | 60 | 13 | 133,1 |
| CIMT+G-CSF | V213-13_1 | 60 | 4  | 43,9  |
| CIMT+G-CSF | V213-16_1 | 60 | 1  | 37,8  |
| CIMT+G-CSF | V213-17_1 | 60 | 8  | 96,5  |
| CIMT+G-CSF | V213-17_2 | 60 | 10 | 133,9 |
| CIMT+G-CSF | V213-18_1 | 60 | 15 | 216,6 |
| CIMT+G-CSF | V213-18_2 | 60 | 5  | 60,6  |
| CIMT+G-CSF | V213-19_1 | 60 | 10 | 206,9 |

|            |           |    |    |       |
|------------|-----------|----|----|-------|
| CIMT+G-CSF | V213-19_2 | 60 | 5  | 63,5  |
| CIMT+G-CSF | V213-20_1 | 60 | 6  | 76,9  |
| CIMT+G-CSF | V213-22_1 | 60 | 11 | 139,4 |
| CIMT+G-CSF | V213-23_1 | 60 | 4  | 60,5  |
| CIMT+G-CSF | V214-14_1 | 60 | 16 | 194,1 |
| CIMT+G-CSF | V214-17_1 | 60 | 13 | 152,6 |
| CIMT+G-CSF | V214-18_1 | 60 | 19 | 224,6 |
| CIMT+G-CSF | V214-19_1 | 60 | 5  | 54,7  |
| CIMT+G-CSF | V214-19_2 | 60 | 9  | 115,7 |
| CIMT+G-CSF | V214-20_1 | 60 | 9  | 184   |
| CIMT+G-CSF | V214-21_1 | 60 | 7  | 97,8  |
| CIMT+G-CSF | V217-1_1  | 60 | 15 | 226   |
| CIMT+G-CSF | V217-2_1  | 60 | 13 | 190,2 |
| CIMT+G-CSF | V217-4_1  | 60 | 27 | 384,7 |
| CIMT+G-CSF | V217-6_1  | 60 | 6  | 159,6 |
| CIMT+G-CSF | V217-6_3  | 60 | 13 | 186   |
| CIMT+G-CSF | V217-8_1  | 60 | 5  | 104,1 |
| CIMT+G-CSF | V217-8_4  | 60 | 11 | 144,8 |
| CIMT+G-CSF | V217-10_1 | 60 | 2  | 59,1  |
| CIMT+G-CSF | V217-11_1 | 60 | 17 | 223,7 |
| CIMT+G-CSF | V304-16_1 | 60 | 1  | 12,1  |
| CIMT+G-CSF | V304-17_1 | 60 | 9  | 115,5 |
| CIMT+G-CSF | V304-17_2 | 60 | 3  | 37    |
| CIMT+G-CSF | V304-17_3 | 60 | 6  | 98    |
| CIMT+G-CSF | V304-17_4 | 60 | 8  | 114,2 |
| CIMT+G-CSF | V304-19_1 | 60 | 3  | 35,4  |
| CIMT+G-CSF | V304-19_2 | 60 | 5  | 84,1  |
| CIMT+G-CSF | V305-17_1 | 60 | 0  | 12,7  |
| CIMT+G-CSF | V305-17_2 | 60 | 5  | 76,7  |
| CIMT+G-CSF | V305-17_3 | 60 | 4  | 65,2  |
| CIMT+G-CSF | V305-18_1 | 60 | 11 | 161   |
| CIMT+G-CSF | V305-18_2 | 60 | 4  | 67,3  |
| CIMT+G-CSF | V305-18_3 | 60 | 2  | 23,5  |
| CIMT+G-CSF | V305-18_4 | 60 | 4  | 59,8  |
| CIMT+G-CSF | V305-19_1 | 60 | 0  | 2,9   |
| CIMT/G-CSF | V306-16_1 | 60 | 8  | 103,4 |
| CIMT/G-CSF | V306-16_2 | 60 | 2  | 51,9  |
| CIMT/G-CSF | V306-17_1 | 60 | 9  | 118,4 |
| CIMT/G-CSF | V306-17_2 | 60 | 13 | 163,3 |
| CIMT/G-CSF | V306-17_3 | 60 | 11 | 160,9 |
| CIMT/G-CSF | V306-17_4 | 60 | 3  | 69,2  |
| CIMT/G-CSF | V306-17_5 | 60 | 2  | 28,3  |
| CIMT/G-CSF | V311-16_1 | 60 | 19 | 272,3 |
| CIMT/G-CSF | V311-17_1 | 60 | 16 | 230,6 |
| CIMT/G-CSF | V311-17_2 | 60 | 9  | 116,2 |
| CIMT/G-CSF | V311-19_1 | 60 | 8  | 123,1 |
| CIMT/G-CSF | V311-20_1 | 60 | 17 | 262,1 |
| CIMT/G-CSF | V311-20_2 | 60 | 5  | 67,5  |
| CIMT/G-CSF | V311-20_3 | 60 | 5  | 63,7  |
| CIMT/G-CSF | V313-14_1 | 60 | 7  | 82,4  |
| CIMT/G-CSF | V313-15_1 | 60 | 0  | 8,1   |
| CIMT/G-CSF | V313-15_2 | 60 | 4  | 65,5  |
| CIMT/G-CSF | V313-17_1 | 60 | 11 | 138,5 |
| CIMT/G-CSF | V313-17_2 | 60 | 4  | 56,8  |
| CIMT/G-CSF | V313-17_3 | 60 | 1  | 12,8  |
| CIMT/G-CSF | V313-19_1 | 60 | 2  | 26,5  |

|            |           |    |    |       |
|------------|-----------|----|----|-------|
| CIMT/G-CSF | V314-16_1 | 60 | 3  | 45,2  |
| CIMT/G-CSF | V314-16_2 | 60 | 9  | 192   |
| CIMT/G-CSF | V314-17_1 | 60 | 9  | 120,9 |
| CIMT/G-CSF | V314-17_3 | 60 | 8  | 117,9 |
| CIMT/G-CSF | V314-18_1 | 60 | 6  | 72,1  |
| CIMT/G-CSF | V314-18_2 | 60 | 8  | 155,9 |
| CIMT/G-CSF | V315-11_1 | 60 | 4  | 60,6  |
| CIMT/G-CSF | V315-11_2 | 60 | 8  | 106,9 |
| CIMT/G-CSF | V315-13_1 | 60 | 13 | 256,5 |
| CIMT/G-CSF | V315-13_2 | 60 | 19 | 238,5 |
| CIMT/G-CSF | V315-14_1 | 60 | 6  | 94,7  |
| CIMT/G-CSF | V315-14_2 | 60 | 9  | 145,6 |
| CIMT/G-CSF | V315-14_3 | 60 | 14 | 178,7 |
| G-CSF      | V220-9_1  | 60 | 13 | 175,5 |
| G-CSF      | V220-11_1 | 60 | 2  | 27,7  |
| G-CSF      | V220-12_1 | 60 | 6  | 100,6 |
| G-CSF      | V220-16_1 | 60 | 14 | 83,8  |
| G-CSF      | V220-16_2 | 60 | 3  | 72,6  |
| G-CSF      | V220-17_1 | 60 | 12 | 173,9 |
| G-CSF      | V220-18_1 | 60 | 8  | 104,8 |
| G-CSF      | V221-2_1  | 60 | 10 | 148,5 |
| G-CSF      | V221-4_1  | 60 | 0  | 7,7   |
| G-CSF      | V221-5_1  | 60 | 0  | 1,5   |
| G-CSF      | V221-6_1  | 60 | 9  | 171,9 |
| G-CSF      | V221-7_1  | 60 | 6  | 75,9  |
| G-CSF      | V221-7_2  | 60 | 19 | 243,4 |
| G-CSF      | V221-11_1 | 60 | 4  | 67    |
| G-CSF      | V221-13_1 | 60 | 25 | 332,9 |
| G-CSF      | V221-15_1 | 60 | 1  | 27    |
| G-CSF      | V221-20_1 | 60 | 8  | 140,6 |
| G-CSF      | V222-19_1 | 60 | 14 | 148,5 |
| G-CSF      | V222-19_2 | 60 | 4  | 53,7  |
| G-CSF      | V222-20_1 | 60 | 3  | 66,5  |
| G-CSF      | V222-20_2 | 60 | 12 | 147,8 |
| G-CSF      | V222-21_1 | 60 | 19 | 255,7 |
| G-CSF      | V222-22_1 | 60 | 7  | 156,6 |
| G-CSF      | V222-22_2 | 60 | 14 | 227,4 |
| G-CSF      | V222-23_1 | 60 | 12 | 152,6 |
| G-CSF      | V222-24_1 | 60 | 19 | 243,8 |
| G-CSF      | V301-18_1 | 60 | 5  | 77,8  |
| G-CSF      | V301-18_2 | 60 | 6  | 76,7  |
| G-CSF      | V301-18_3 | 60 | 4  | 63,9  |
| G-CSF      | V301-19_1 | 60 | 7  | 70,6  |
| G-CSF      | V301-19_2 | 60 | 5  | 63,5  |
| G-CSF      | V301-20_1 | 60 | 7  | 95    |
| G-CSF      | V301-20_2 | 60 | 6  | 110,6 |
| G-CSF      | V302-15_1 | 60 | 4  | 63,5  |
| G-CSF      | V302-15_2 | 60 | 5  | 80,6  |
| G-CSF      | V302-15_3 | 60 | 5  | 71,3  |
| G-CSF      | V302-16_1 | 60 | 2  | 23,2  |
| G-CSF      | V302-16_3 | 60 | 3  | 82,9  |
| G-CSF      | V302-16_4 | 60 | 7  | 83    |
| G-CSF      | V302-17_1 | 60 | 17 | 254,5 |
| G-CSF      | V302-17_2 | 60 | 6  | 86,9  |
| G-CSF      | V302-17_3 | 60 | 5  | 79,4  |
| G-CSF      | V303-15_1 | 60 | 2  | 63,7  |

|       |           |    |    |       |
|-------|-----------|----|----|-------|
| G-CSF | V303-15_2 | 60 | 7  | 129,9 |
| G-CSF | V303-15_3 | 60 | 11 | 162,3 |
| G-CSF | V303-16_1 | 60 | 20 | 223,2 |
| G-CSF | V303-16_2 | 60 | 10 | 120,8 |
| G-CSF | V303-16_3 | 60 | 10 | 176,1 |
| G-CSF | V303-17_1 | 60 | 17 | 220,9 |

**basilar dendrite Sholl 70 $\mu$ m**

| <b>Group</b> | <b>number</b> | <b>Radius(<math>\mu</math>m)</b> | <b>Intersections</b> | <b>Length(<math>\mu</math>m)</b> |
|--------------|---------------|----------------------------------|----------------------|----------------------------------|
| Control      | V215-10_1     | 70                               | 0                    | 7,2                              |
| Control      | V215-10_2     | 70                               | 15                   | 202,7                            |
| Control      | V215-11_1     | 70                               | 6                    | 75,8                             |
| Control      | V215-12_1     | 70                               | 8                    | 90,9                             |
| Control      | V215-12_2     | 70                               | 10                   | 155,4                            |
| Control      | V215-13_1     | 70                               | 6                    | 86,2                             |
| Control      | V215-15_1     | 70                               | 1                    | 22,6                             |
| Control      | V215-15_2     | 70                               | 7                    | 80,2                             |
| Control      | V215-16_1     | 70                               | 4                    | 67,6                             |
| Control      | V215-18_1     | 70                               | 4                    | 48,3                             |
| Control      | V216-11_1     | 70                               | 4                    | 75,3                             |
| Control      | V216-12_1     | 70                               | 3                    | 38,8                             |
| Control      | V216-13_1     | 70                               | 2                    | 26,3                             |
| Control      | V216-14_1     | 70                               | 4                    | 52,2                             |
| Control      | V216-14_2     | 70                               | 2                    | 35,7                             |
| Control      | V216-16_2     | 70                               | 6                    | 81,6                             |
| Control      | V216-17_1     | 70                               | 1                    | 38,5                             |
| Control      | V216-18_1     | 70                               | 2                    | 22,1                             |
| Control      | V216-18_2     | 70                               | 5                    | 55,9                             |
| Control      | V219-6_1      | 70                               | 18                   | 299,5                            |
| Control      | V219-11_1     | 70                               | 13                   | 197,7                            |
| Control      | V219-12_1     | 70                               | 8                    | 127,2                            |
| Control      | V219-13_1     | 70                               | 5                    | 108,7                            |
| Control      | V219-13_2     | 70                               | 1                    | 22,9                             |
| Control      | V219-14_1     | 70                               | 2                    | 44,4                             |
| Control      | V219-14_2     | 70                               | 15                   | 242,7                            |
| Control      | V219-16_1     | 70                               | 7                    | 103,3                            |
| Control      | V297-19_1     | 70                               | 12                   | 201                              |
| Control      | V297-19_2     | 70                               | 2                    | 41                               |
| Control      | V297-20_1     | 70                               | 5                    | 66,5                             |
| Control      | V297-20_2     | 70                               | 2                    | 38,7                             |
| Control      | V297-20_3     | 70                               | 9                    | 133                              |
| Control      | V297-22_1     | 70                               | 12                   | 174                              |
| Control      | V297-22_2     | 70                               | 0                    | 14,7                             |
| Control      | V298-15_1     | 70                               | 16                   | 182                              |
| Control      | V298-16_1     | 70                               | 2                    | 30,5                             |
| Control      | V298-16_2     | 70                               | 5                    | 50,7                             |
| Control      | V298-16_3     | 70                               | 1                    | 26,9                             |
| Control      | V298-17_1     | 70                               | 2                    | 22,8                             |
| Control      | V298-17_2     | 70                               | 13                   | 150,4                            |
| Control      | V298-17_3     | 70                               | 12                   | 145,4                            |
| Control      | V308-17_1     | 70                               | 4                    | 59,5                             |
| Control      | V308-17_2     | 70                               | 13                   | 184,4                            |
| Control      | V308-17_3     | 70                               | 9                    | 163,7                            |
| Control      | V308-17_4     | 70                               | 5                    | 82                               |

|            |           |    |    |       |
|------------|-----------|----|----|-------|
| Control    | V308-18_1 | 70 | 7  | 132,6 |
| Control    | V308-18_2 | 70 | 6  | 91,8  |
| Control    | V308-18_3 | 70 | 9  | 132,6 |
| CIMT       | V211-10_1 | 70 | 21 | 295   |
| CIMT       | V211-10_2 | 70 | 6  | 73,6  |
| CIMT       | V211-11_1 | 70 | 4  | 50,5  |
| CIMT       | V211-11_2 | 70 | 1  | 33,2  |
| CIMT       | V211-12_1 | 70 | 8  | 118,3 |
| CIMT       | V211-13_1 | 70 | 7  | 95,6  |
| CIMT       | V211-13_2 | 70 | 11 | 158,3 |
| CIMT       | V211-15_1 | 70 | 4  | 60,2  |
| CIMT       | V211-15_2 | 70 | 5  | 67    |
| CIMT       | V211-16_1 | 70 | 10 | 113,8 |
| CIMT       | V212-14_1 | 70 | 13 | 179   |
| CIMT       | V212-14_2 | 70 | 12 | 148,8 |
| CIMT       | V212-15_1 | 70 | 14 | 183,3 |
| CIMT       | V212-18_1 | 70 | 8  | 118,1 |
| CIMT       | V212-21_1 | 70 | 7  | 89,4  |
| CIMT       | V212-21_2 | 70 | 16 | 164,2 |
| CIMT       | V212-22_1 | 70 | 7  | 79,7  |
| CIMT       | V212-23_1 | 70 | 6  | 111,6 |
| CIMT       | V212-23_2 | 70 | 29 | 375,1 |
| CIMT       | V212-24_1 | 70 | 7  | 58,6  |
| CIMT       | V218-9_1  | 70 | 4  | 75,8  |
| CIMT       | V218-10_1 | 70 | 13 | 205,5 |
| CIMT       | V218-11_1 | 70 | 16 | 178,3 |
| CIMT       | V218-12_1 | 70 | 13 | 155,9 |
| CIMT       | V218-12_2 | 70 | 7  | 102,3 |
| CIMT       | V218-13_1 | 70 | 3  | 55,8  |
| CIMT       | V218-15_1 | 70 | 6  | 81,4  |
| CIMT       | V218-17_1 | 70 | 6  | 90,8  |
| CIMT       | V299-14_1 | 70 | 4  | 49,6  |
| CIMT       | V299-16_1 | 70 | 2  | 56,2  |
| CIMT       | V299-16_2 | 70 | 9  | 138   |
| CIMT       | V299-17_1 | 70 | 10 | 143,5 |
| CIMT       | V299-17_2 | 70 | 6  | 53,1  |
| CIMT       | V300-16_1 | 70 | 11 | 149,2 |
| CIMT       | V300-18_1 | 70 | 5  | 58,7  |
| CIMT       | V300-18_2 | 70 | 9  | 175,7 |
| CIMT       | V300-20_1 | 70 | 7  | 86,7  |
| CIMT       | V300-22_1 | 70 | 10 | 164,5 |
| CIMT       | V300-23_1 | 70 | 8  | 124,9 |
| CIMT       | V300-23_2 | 70 | 3  | 56,6  |
| CIMT       | V309-15_1 | 70 | 4  | 49,4  |
| CIMT       | V309-15_2 | 70 | 5  | 69,7  |
| CIMT       | V309-16_1 | 70 | 12 | 186,2 |
| CIMT       | V309-16_2 | 70 | 1  | 15,6  |
| CIMT       | V309-16_3 | 70 | 9  | 126,2 |
| CIMT       | V309-17_1 | 70 | 6  | 85,9  |
| CIMT       | V309-17_2 | 70 | 12 | 141,6 |
| CIMT+G-CSF | V213-13_1 | 70 | 4  | 47,3  |
| CIMT+G-CSF | V213-16_1 | 70 | 1  | 12,2  |
| CIMT+G-CSF | V213-17_1 | 70 | 7  | 94,7  |
| CIMT+G-CSF | V213-17_2 | 70 | 9  | 122,8 |
| CIMT+G-CSF | V213-18_1 | 70 | 11 | 176,9 |
| CIMT+G-CSF | V213-18_2 | 70 | 3  | 56,7  |

|            |           |    |    |       |
|------------|-----------|----|----|-------|
| CIMT+G-CSF | V213-19_1 | 70 | 9  | 122,3 |
| CIMT+G-CSF | V213-19_2 | 70 | 3  | 52,9  |
| CIMT+G-CSF | V213-20_1 | 70 | 4  | 50,3  |
| CIMT+G-CSF | V213-22_1 | 70 | 9  | 121,5 |
| CIMT+G-CSF | V213-23_1 | 70 | 5  | 61,4  |
| CIMT+G-CSF | V214-14_1 | 70 | 16 | 202,2 |
| CIMT+G-CSF | V214-17_1 | 70 | 9  | 171,4 |
| CIMT+G-CSF | V214-18_1 | 70 | 22 | 295,5 |
| CIMT+G-CSF | V214-19_1 | 70 | 4  | 57,5  |
| CIMT+G-CSF | V214-19_2 | 70 | 8  | 99,8  |
| CIMT+G-CSF | V214-20_1 | 70 | 8  | 106,6 |
| CIMT+G-CSF | V214-21_1 | 70 | 8  | 103,2 |
| CIMT+G-CSF | V217-1_1  | 70 | 13 | 198,7 |
| CIMT+G-CSF | V217-2_1  | 70 | 11 | 169,3 |
| CIMT+G-CSF | V217-4_1  | 70 | 28 | 365,4 |
| CIMT+G-CSF | V217-6_1  | 70 | 5  | 104,3 |
| CIMT+G-CSF | V217-6_3  | 70 | 10 | 146,8 |
| CIMT+G-CSF | V217-8_1  | 70 | 2  | 54,1  |
| CIMT+G-CSF | V217-8_4  | 70 | 13 | 187,1 |
| CIMT+G-CSF | V217-10_1 | 70 | 1  | 23    |
| CIMT+G-CSF | V217-11_1 | 70 | 15 | 197,4 |
| CIMT+G-CSF | V304-16_1 | 70 | 1  | 11,1  |
| CIMT+G-CSF | V304-17_1 | 70 | 8  | 102,3 |
| CIMT+G-CSF | V304-17_2 | 70 | 2  | 33,7  |
| CIMT+G-CSF | V304-17_3 | 70 | 5  | 62,7  |
| CIMT+G-CSF | V304-17_4 | 70 | 13 | 159,3 |
| CIMT+G-CSF | V304-19_1 | 70 | 3  | 40,9  |
| CIMT+G-CSF | V304-19_2 | 70 | 6  | 66,2  |
| CIMT+G-CSF | V305-17_2 | 70 | 3  | 44,8  |
| CIMT+G-CSF | V305-17_3 | 70 | 3  | 47,8  |
| CIMT+G-CSF | V305-18_1 | 70 | 9  | 137,5 |
| CIMT+G-CSF | V305-18_2 | 70 | 2  | 43,3  |
| CIMT+G-CSF | V305-18_3 | 70 | 0  | 6,7   |
| CIMT+G-CSF | V305-18_4 | 70 | 3  | 45,8  |
| CIMT/G-CSF | V306-16_1 | 70 | 7  | 100,5 |
| CIMT/G-CSF | V306-16_2 | 70 | 2  | 22,7  |
| CIMT/G-CSF | V306-17_1 | 70 | 9  | 124,8 |
| CIMT/G-CSF | V306-17_2 | 70 | 12 | 157   |
| CIMT/G-CSF | V306-17_3 | 70 | 6  | 132,9 |
| CIMT/G-CSF | V306-17_4 | 70 | 2  | 34,5  |
| CIMT/G-CSF | V306-17_5 | 70 | 2  | 28,1  |
| CIMT/G-CSF | V311-16_1 | 70 | 18 | 238,5 |
| CIMT/G-CSF | V311-17_1 | 70 | 13 | 181,6 |
| CIMT/G-CSF | V311-17_2 | 70 | 5  | 72,5  |
| CIMT/G-CSF | V311-19_1 | 70 | 8  | 111,4 |
| CIMT/G-CSF | V311-20_1 | 70 | 16 | 235,8 |
| CIMT/G-CSF | V311-20_2 | 70 | 5  | 61,6  |
| CIMT/G-CSF | V311-20_3 | 70 | 5  | 55,7  |
| CIMT/G-CSF | V313-14_1 | 70 | 7  | 101,6 |
| CIMT/G-CSF | V313-15_2 | 70 | 4  | 39,2  |
| CIMT/G-CSF | V313-17_1 | 70 | 12 | 141   |
| CIMT/G-CSF | V313-17_2 | 70 | 4  | 38,1  |
| CIMT/G-CSF | V313-17_3 | 70 | 1  | 13,1  |
| CIMT/G-CSF | V313-19_1 | 70 | 1  | 23,9  |
| CIMT/G-CSF | V314-16_1 | 70 | 2  | 27,5  |
| CIMT/G-CSF | V314-16_2 | 70 | 7  | 126   |

|            |           |    |    |       |
|------------|-----------|----|----|-------|
| CIMT/G-CSF | V314-17_1 | 70 | 6  | 88,1  |
| CIMT/G-CSF | V314-17_3 | 70 | 5  | 85,4  |
| CIMT/G-CSF | V314-18_1 | 70 | 5  | 59,8  |
| CIMT/G-CSF | V314-18_2 | 70 | 7  | 103,5 |
| CIMT/G-CSF | V315-11_1 | 70 | 5  | 81,5  |
| CIMT/G-CSF | V315-11_2 | 70 | 4  | 79,5  |
| CIMT/G-CSF | V315-13_1 | 70 | 9  | 183,6 |
| CIMT/G-CSF | V315-13_2 | 70 | 16 | 231,1 |
| CIMT/G-CSF | V315-14_1 | 70 | 4  | 65,2  |
| CIMT/G-CSF | V315-14_2 | 70 | 6  | 78    |
| CIMT/G-CSF | V315-14_3 | 70 | 15 | 171,9 |
| G-CSF      | V220-9_1  | 70 | 11 | 138,3 |
| G-CSF      | V220-11_1 | 70 | 0  | 7,8   |
| G-CSF      | V220-12_1 | 70 | 5  | 110,6 |
| G-CSF      | V220-16_1 | 70 | 13 | 213,2 |
| G-CSF      | V220-16_2 | 70 | 2  | 32,4  |
| G-CSF      | V220-17_1 | 70 | 13 | 213,2 |
| G-CSF      | V220-18_1 | 70 | 7  | 106,8 |
| G-CSF      | V221-2_1  | 70 | 10 | 136,7 |
| G-CSF      | V221-6_1  | 70 | 6  | 94,7  |
| G-CSF      | V221-7_1  | 70 | 4  | 64,3  |
| G-CSF      | V221-7_2  | 70 | 14 | 223,3 |
| G-CSF      | V221-11_1 | 70 | 3  | 37,7  |
| G-CSF      | V221-13_1 | 70 | 23 | 298,9 |
| G-CSF      | V221-15_1 | 70 | 1  | 10,7  |
| G-CSF      | V221-20_1 | 70 | 6  | 77,9  |
| G-CSF      | V222-19_1 | 70 | 13 | 193,2 |
| G-CSF      | V222-19_2 | 70 | 3  | 46,7  |
| G-CSF      | V222-20_1 | 70 | 19 | 174,5 |
| G-CSF      | V222-20_2 | 70 | 9  | 127,3 |
| G-CSF      | V222-21_1 | 70 | 16 | 220,3 |
| G-CSF      | V222-22_1 | 70 | 8  | 120,3 |
| G-CSF      | V222-22_2 | 70 | 9  | 147,9 |
| G-CSF      | V222-23_1 | 70 | 13 | 171,8 |
| G-CSF      | V222-24_1 | 70 | 13 | 209   |
| G-CSF      | V301-18_1 | 70 | 4  | 60,3  |
| G-CSF      | V301-18_2 | 70 | 5  | 67,4  |
| G-CSF      | V301-18_3 | 70 | 4  | 61,2  |
| G-CSF      | V301-19_1 | 70 | 6  | 78,4  |
| G-CSF      | V301-19_2 | 70 | 4  | 72,8  |
| G-CSF      | V301-20_1 | 70 | 7  | 89,4  |
| G-CSF      | V301-20_2 | 70 | 5  | 70,3  |
| G-CSF      | V302-15_1 | 70 | 3  | 41,2  |
| G-CSF      | V302-15_2 | 70 | 5  | 64,3  |
| G-CSF      | V302-15_3 | 70 | 5  | 54,9  |
| G-CSF      | V302-16_1 | 70 | 1  | 21,7  |
| G-CSF      | V302-16_3 | 70 | 3  | 33,9  |
| G-CSF      | V302-16_4 | 70 | 7  | 79,4  |
| G-CSF      | V302-17_1 | 70 | 16 | 252,8 |
| G-CSF      | V302-17_2 | 70 | 4  | 56,5  |
| G-CSF      | V302-17_3 | 70 | 4  | 48,7  |
| G-CSF      | V303-15_1 | 70 | 1  | 15,3  |
| G-CSF      | V303-15_2 | 70 | 5  | 83    |
| G-CSF      | V303-15_3 | 70 | 9  | 121,3 |
| G-CSF      | V303-16_1 | 70 | 15 | 268,8 |
| G-CSF      | V303-16_2 | 70 | 9  | 107,1 |

|       |           |    |    |       |
|-------|-----------|----|----|-------|
| G-CSF | V303-16_3 | 70 | 7  | 118,5 |
| G-CSF | V303-17_1 | 70 | 16 | 219,3 |

**basilar dendrite Sholl 80µm**

| <b>Group</b> | <b>number</b> | <b>Radius(µm)</b> | <b>Intersections</b> | <b>Length(µm)</b> |
|--------------|---------------|-------------------|----------------------|-------------------|
| Control      | V215-10_2     | 80                | 15                   | 185,4             |
| Control      | V215-11_1     | 80                | 4                    | 63,8              |
| Control      | V215-12_1     | 80                | 7                    | 98,3              |
| Control      | V215-12_2     | 80                | 9                    | 116,4             |
| Control      | V215-13_1     | 80                | 6                    | 78,8              |
| Control      | V215-15_1     | 80                | 1                    | 10,9              |
| Control      | V215-15_2     | 80                | 6                    | 93,9              |
| Control      | V215-16_1     | 80                | 4                    | 44,8              |
| Control      | V215-18_1     | 80                | 2                    | 32,2              |
| Control      | V216-11_1     | 80                | 3                    | 33,1              |
| Control      | V216-12_1     | 80                | 2                    | 33,9              |
| Control      | V216-13_1     | 80                | 2                    | 20,9              |
| Control      | V216-14_1     | 80                | 3                    | 39,2              |
| Control      | V216-14_2     | 80                | 1                    | 15,4              |
| Control      | V216-16_2     | 80                | 8                    | 74,2              |
| Control      | V216-17_1     | 80                | 1                    | 12,6              |
| Control      | V216-18_1     | 80                | 1                    | 17                |
| Control      | V216-18_2     | 80                | 5                    | 68                |
| Control      | V219-6_1      | 80                | 22                   | 317,6             |
| Control      | V219-11_1     | 80                | 10                   | 183,6             |
| Control      | V219-12_1     | 80                | 8                    | 105,7             |
| Control      | V219-13_1     | 80                | 2                    | 69,4              |
| Control      | V219-13_2     | 80                | 1                    | 16,3              |
| Control      | V219-14_1     | 80                | 1                    | 31,5              |
| Control      | V219-14_2     | 80                | 15                   | 208,6             |
| Control      | V219-16_1     | 80                | 6                    | 97,6              |
| Control      | V297-19_1     | 80                | 7                    | 123,5             |
| Control      | V297-19_2     | 80                | 3                    | 44,3              |
| Control      | V297-20_1     | 80                | 1                    | 25,8              |
| Control      | V297-20_2     | 80                | 2                    | 25                |
| Control      | V297-20_3     | 80                | 8                    | 99,2              |
| Control      | V297-22_1     | 80                | 12                   | 144,3             |
| Control      | V298-15_1     | 80                | 13                   | 201,4             |
| Control      | V298-16_1     | 80                | 1                    | 24,4              |
| Control      | V298-16_2     | 80                | 6                    | 70,2              |
| Control      | V298-16_3     | 80                | 1                    | 10,8              |
| Control      | V298-17_1     | 80                | 2                    | 22,9              |
| Control      | V298-17_2     | 80                | 14                   | 164,6             |
| Control      | V298-17_3     | 80                | 12                   | 160,6             |
| Control      | V308-17_1     | 80                | 3                    | 46,8              |
| Control      | V308-17_2     | 80                | 15                   | 198,2             |
| Control      | V308-17_3     | 80                | 7                    | 127,6             |
| Control      | V308-17_4     | 80                | 7                    | 84,8              |
| Control      | V308-18_1     | 80                | 3                    | 68,5              |
| Control      | V308-18_2     | 80                | 5                    | 86,4              |
| Control      | V308-18_3     | 80                | 9                    | 133,3             |
| CIMT         | V211-10_1     | 80                | 19                   | 275               |
| CIMT         | V211-10_2     | 80                | 8                    | 79,3              |
| CIMT         | V211-11_1     | 80                | 3                    | 45                |



|            |           |    |    |       |
|------------|-----------|----|----|-------|
| CIMT       | V211-11_2 | 80 | 1  | 11,7  |
| CIMT       | V211-12_1 | 80 | 6  | 85,2  |
| CIMT       | V211-13_1 | 80 | 7  | 68,2  |
| CIMT       | V211-13_2 | 80 | 8  | 114,5 |
| CIMT       | V211-15_1 | 80 | 2  | 32,5  |
| CIMT       | V211-15_2 | 80 | 5  | 78,4  |
| CIMT       | V211-16_1 | 80 | 9  | 119,1 |
| CIMT       | V212-14_1 | 80 | 11 | 147,2 |
| CIMT       | V212-14_2 | 80 | 11 | 154,1 |
| CIMT       | V212-15_1 | 80 | 16 | 180,9 |
| CIMT       | V212-18_1 | 80 | 4  | 81    |
| CIMT       | V212-21_1 | 80 | 6  | 81,4  |
| CIMT       | V212-21_2 | 80 | 16 | 244,6 |
| CIMT       | V212-22_1 | 80 | 5  | 76,5  |
| CIMT       | V212-23_1 | 80 | 6  | 72,3  |
| CIMT       | V212-23_2 | 80 | 25 | 347,8 |
| CIMT       | V212-24_1 | 80 | 6  | 157,4 |
| CIMT       | V218-9_1  | 80 | 3  | 52,4  |
| CIMT       | V218-10_1 | 80 | 10 | 154,5 |
| CIMT       | V218-11_1 | 80 | 14 | 167,3 |
| CIMT       | V218-12_1 | 80 | 10 | 173,5 |
| CIMT       | V218-12_2 | 80 | 6  | 106   |
| CIMT       | V218-13_1 | 80 | 0  | 9,7   |
| CIMT       | V218-15_1 | 80 | 3  | 74,4  |
| CIMT       | V218-17_1 | 80 | 6  | 73    |
| CIMT       | V299-14_1 | 80 | 3  | 41,3  |
| CIMT       | V299-16_1 | 80 | 1  | 14,3  |
| CIMT       | V299-16_2 | 80 | 7  | 105,4 |
| CIMT       | V299-17_1 | 80 | 9  | 127,7 |
| CIMT       | V299-17_2 | 80 | 5  | 89,5  |
| CIMT       | V300-16_1 | 80 | 9  | 130,8 |
| CIMT       | V300-18_1 | 80 | 5  | 57,9  |
| CIMT       | V300-18_2 | 80 | 8  | 99,4  |
| CIMT       | V300-20_1 | 80 | 6  | 73,5  |
| CIMT       | V300-22_1 | 80 | 8  | 100,8 |
| CIMT       | V300-23_1 | 80 | 3  | 53,5  |
| CIMT       | V300-23_2 | 80 | 3  | 35,1  |
| CIMT       | V309-15_1 | 80 | 3  | 43    |
| CIMT       | V309-15_2 | 80 | 3  | 47,8  |
| CIMT       | V309-16_1 | 80 | 8  | 155,7 |
| CIMT       | V309-16_2 | 80 | 0  | 4     |
| CIMT       | V309-16_3 | 80 | 8  | 127,3 |
| CIMT       | V309-17_1 | 80 | 4  | 51,4  |
| CIMT       | V309-17_2 | 80 | 11 | 141   |
| CIMT+G-CSF | V213-13_1 | 80 | 3  | 36,2  |
| CIMT+G-CSF | V213-16_1 | 80 | 1  | 10,2  |
| CIMT+G-CSF | V213-17_1 | 80 | 5  | 82,1  |
| CIMT+G-CSF | V213-17_2 | 80 | 7  | 92,8  |
| CIMT+G-CSF | V213-18_1 | 80 | 7  | 107,9 |
| CIMT+G-CSF | V213-18_2 | 80 | 3  | 37,2  |
| CIMT+G-CSF | V213-19_1 | 80 | 9  | 125,9 |
| CIMT+G-CSF | V213-19_2 | 80 | 3  | 38,5  |
| CIMT+G-CSF | V213-20_1 | 80 | 4  | 53    |
| CIMT+G-CSF | V213-22_1 | 80 | 8  | 93,9  |
| CIMT+G-CSF | V213-23_1 | 80 | 4  | 53,1  |
| CIMT+G-CSF | V214-14_1 | 80 | 13 | 216,6 |

|            |           |    |    |       |
|------------|-----------|----|----|-------|
| CIMT+G-CSF | V214-17_1 | 80 | 7  | 110,9 |
| CIMT+G-CSF | V214-18_1 | 80 | 22 | 286,8 |
| CIMT+G-CSF | V214-19_1 | 80 | 4  | 53,2  |
| CIMT+G-CSF | V214-19_2 | 80 | 8  | 104,7 |
| CIMT+G-CSF | V214-20_1 | 80 | 9  | 100,4 |
| CIMT+G-CSF | V214-21_1 | 80 | 8  | 97,9  |
| CIMT+G-CSF | V217-1_1  | 80 | 14 | 174,9 |
| CIMT+G-CSF | V217-2_1  | 80 | 7  | 124   |
| CIMT+G-CSF | V217-4_1  | 80 | 26 | 357,4 |
| CIMT+G-CSF | V217-6_1  | 80 | 3  | 60,4  |
| CIMT+G-CSF | V217-6_3  | 80 | 9  | 127,7 |
| CIMT+G-CSF | V217-8_1  | 80 | 0  | 8     |
| CIMT+G-CSF | V217-8_4  | 80 | 9  | 196,5 |
| CIMT+G-CSF | V217-10_1 | 80 | 1  | 12,3  |
| CIMT+G-CSF | V217-11_1 | 80 | 12 | 181,2 |
| CIMT+G-CSF | V304-16_1 | 80 | 1  | 11,6  |
| CIMT+G-CSF | V304-17_1 | 80 | 5  | 129,4 |
| CIMT+G-CSF | V304-17_2 | 80 | 2  | 21,6  |
| CIMT+G-CSF | V304-17_3 | 80 | 4  | 51,2  |
| CIMT+G-CSF | V304-17_4 | 80 | 11 | 158,9 |
| CIMT+G-CSF | V304-19_1 | 80 | 2  | 32,6  |
| CIMT+G-CSF | V304-19_2 | 80 | 4  | 47,8  |
| CIMT+G-CSF | V305-17_2 | 80 | 0  | 19,4  |
| CIMT+G-CSF | V305-17_3 | 80 | 1  | 30,7  |
| CIMT+G-CSF | V305-18_1 | 80 | 7  | 96    |
| CIMT+G-CSF | V305-18_2 | 80 | 1  | 15,7  |
| CIMT+G-CSF | V305-18_4 | 80 | 2  | 30,6  |
| CIMT/G-CSF | V306-16_1 | 80 | 6  | 103,7 |
| CIMT/G-CSF | V306-16_2 | 80 | 1  | 12,2  |
| CIMT/G-CSF | V306-17_1 | 80 | 5  | 98,3  |
| CIMT/G-CSF | V306-17_2 | 80 | 9  | 145,7 |
| CIMT/G-CSF | V306-17_3 | 80 | 3  | 56,6  |
| CIMT/G-CSF | V306-17_4 | 80 | 2  | 29,2  |
| CIMT/G-CSF | V306-17_5 | 80 | 1  | 23,6  |
| CIMT/G-CSF | V311-16_1 | 80 | 16 | 210,9 |
| CIMT/G-CSF | V311-17_1 | 80 | 13 | 160,9 |
| CIMT/G-CSF | V311-17_2 | 80 | 4  | 66,7  |
| CIMT/G-CSF | V311-19_1 | 80 | 8  | 107,2 |
| CIMT/G-CSF | V311-20_1 | 80 | 17 | 208,2 |
| CIMT/G-CSF | V311-20_2 | 80 | 5  | 63,7  |
| CIMT/G-CSF | V311-20_3 | 80 | 5  | 57,1  |
| CIMT/G-CSF | V313-14_1 | 80 | 4  | 65,1  |
| CIMT/G-CSF | V313-15_2 | 80 | 1  | 29    |
| CIMT/G-CSF | V313-17_1 | 80 | 10 | 117,3 |
| CIMT/G-CSF | V313-17_2 | 80 | 1  | 37,5  |
| CIMT/G-CSF | V313-17_3 | 80 | 1  | 11,8  |
| CIMT/G-CSF | V313-19_1 | 80 | 1  | 10,7  |
| CIMT/G-CSF | V314-16_1 | 80 | 0  | 5,9   |
| CIMT/G-CSF | V314-16_2 | 80 | 9  | 120   |
| CIMT/G-CSF | V314-17_1 | 80 | 6  | 73    |
| CIMT/G-CSF | V314-17_3 | 80 | 1  | 46,2  |
| CIMT/G-CSF | V314-18_1 | 80 | 3  | 51,1  |
| CIMT/G-CSF | V314-18_2 | 80 | 5  | 88    |
| CIMT/G-CSF | V315-11_1 | 80 | 4  | 83,2  |
| CIMT/G-CSF | V315-11_2 | 80 | 2  | 33,8  |
| CIMT/G-CSF | V315-13_1 | 80 | 5  | 116,8 |

|            |           |    |    |       |
|------------|-----------|----|----|-------|
| CIMT/G-CSF | V315-13_2 | 80 | 18 | 205,5 |
| CIMT/G-CSF | V315-14_1 | 80 | 4  | 45,3  |
| CIMT/G-CSF | V315-14_2 | 80 | 6  | 68,5  |
| CIMT/G-CSF | V315-14_3 | 80 | 17 | 190,3 |
| G-CSF      | V220-9_1  | 80 | 9  | 134,6 |
| G-CSF      | V220-12_1 | 80 | 4  | 64,8  |
| G-CSF      | V220-16_1 | 80 | 10 | 187,9 |
| G-CSF      | V220-16_2 | 80 | 1  | 11    |
| G-CSF      | V220-17_1 | 80 | 10 | 190,7 |
| G-CSF      | V220-18_1 | 80 | 6  | 83,6  |
| G-CSF      | V221-2_1  | 80 | 8  | 140,1 |
| G-CSF      | V221-6_1  | 80 | 7  | 78,1  |
| G-CSF      | V221-7_1  | 80 | 4  | 46    |
| G-CSF      | V221-7_2  | 80 | 13 | 158   |
| G-CSF      | V221-11_1 | 80 | 2  | 35,1  |
| G-CSF      | V221-13_1 | 80 | 23 | 322,8 |
| G-CSF      | V221-15_1 | 80 | 1  | 10,2  |
| G-CSF      | V221-20_1 | 80 | 5  | 60,7  |
| G-CSF      | V222-19_1 | 80 | 14 | 184,4 |
| G-CSF      | V222-19_2 | 80 | 2  | 29,2  |
| G-CSF      | V222-20_1 | 80 | 13 | 214,9 |
| G-CSF      | V222-20_2 | 80 | 7  | 97,1  |
| G-CSF      | V222-21_1 | 80 | 12 | 179,7 |
| G-CSF      | V222-22_1 | 80 | 9  | 148,4 |
| G-CSF      | V222-22_2 | 80 | 7  | 93,3  |
| G-CSF      | V222-23_1 | 80 | 12 | 162,9 |
| G-CSF      | V222-24_1 | 80 | 11 | 162,1 |
| G-CSF      | V301-18_1 | 80 | 2  | 30,6  |
| G-CSF      | V301-18_2 | 80 | 4  | 45,4  |
| G-CSF      | V301-18_3 | 80 | 1  | 32,7  |
| G-CSF      | V301-19_1 | 80 | 4  | 86,6  |
| G-CSF      | V301-19_2 | 80 | 4  | 45,3  |
| G-CSF      | V301-20_1 | 80 | 4  | 71    |
| G-CSF      | V301-20_2 | 80 | 4  | 59,9  |
| G-CSF      | V302-15_1 | 80 | 2  | 29,3  |
| G-CSF      | V302-15_2 | 80 | 4  | 62,7  |
| G-CSF      | V302-15_3 | 80 | 4  | 49,6  |
| G-CSF      | V302-16_1 | 80 | 1  | 10,4  |
| G-CSF      | V302-16_3 | 80 | 2  | 31,7  |
| G-CSF      | V302-16_4 | 80 | 6  | 66,9  |
| G-CSF      | V302-17_1 | 80 | 17 | 213,6 |
| G-CSF      | V302-17_2 | 80 | 3  | 47,2  |
| G-CSF      | V302-17_3 | 80 | 2  | 41,1  |
| G-CSF      | V303-15_1 | 80 | 0  | 5,9   |
| G-CSF      | V303-15_2 | 80 | 5  | 72,5  |
| G-CSF      | V303-15_3 | 80 | 8  | 105,6 |
| G-CSF      | V303-16_1 | 80 | 14 | 178,2 |
| G-CSF      | V303-16_2 | 80 | 8  | 94,7  |
| G-CSF      | V303-16_3 | 80 | 3  | 91,7  |
| G-CSF      | V303-17_1 | 80 | 15 | 199,6 |

**basilar dendrite Sholl 90 $\mu$ m**

| <b>Group</b> | <b>number</b> | <b>Radius(<math>\mu</math>m)</b> | <b>Intersections</b> | <b>Length(<math>\mu</math>m)</b> |
|--------------|---------------|----------------------------------|----------------------|----------------------------------|
| Control      | V215-10_2     | 90                               | 14                   | 179,5                            |
| Control      | V215-11_1     | 90                               | 2                    | 45,2                             |
| Control      | V215-12_1     | 90                               | 4                    | 77,7                             |
| Control      | V215-12_2     | 90                               | 8                    | 98,6                             |
| Control      | V215-13_1     | 90                               | 5                    | 77,3                             |
| Control      | V215-15_1     | 90                               | 0                    | 3,7                              |
| Control      | V215-15_2     | 90                               | 5                    | 77,6                             |
| Control      | V215-16_1     | 90                               | 4                    | 44,2                             |
| Control      | V215-18_1     | 90                               | 2                    | 26                               |
| Control      | V216-11_1     | 90                               | 3                    | 33,4                             |
| Control      | V216-12_1     | 90                               | 0                    | 7,6                              |
| Control      | V216-13_1     | 90                               | 2                    | 21                               |
| Control      | V216-14_1     | 90                               | 1                    | 22,2                             |
| Control      | V216-14_2     | 90                               | 0                    | 2,3                              |
| Control      | V216-16_2     | 90                               | 6                    | 68,3                             |
| Control      | V216-17_1     | 90                               | 1                    | 12,5                             |
| Control      | V216-18_1     | 90                               | 0                    | 7                                |
| Control      | V216-18_2     | 90                               | 4                    | 60,8                             |
| Control      | V219-6_1      | 90                               | 22                   | 324,1                            |
| Control      | V219-11_1     | 90                               | 11                   | 153,7                            |
| Control      | V219-12_1     | 90                               | 9                    | 111,5                            |
| Control      | V219-13_1     | 90                               | 1                    | 34,2                             |
| Control      | V219-13_2     | 90                               | 0                    | 6,6                              |
| Control      | V219-14_1     | 90                               | 0                    | 5,8                              |
| Control      | V219-14_2     | 90                               | 6                    | 115,6                            |
| Control      | V219-16_1     | 90                               | 4                    | 77,9                             |
| Control      | V297-19_1     | 90                               | 7                    | 84,3                             |
| Control      | V297-19_2     | 90                               | 1                    | 16,1                             |
| Control      | V297-20_1     | 90                               | 0                    | 3,8                              |
| Control      | V297-20_2     | 90                               | 2                    | 25,7                             |
| Control      | V297-20_3     | 90                               | 7                    | 150,9                            |
| Control      | V297-22_1     | 90                               | 11                   | 137,3                            |
| Control      | V298-15_1     | 90                               | 16                   | 196                              |
| Control      | V298-16_1     | 90                               | 0                    | 1,7                              |
| Control      | V298-16_2     | 90                               | 4                    | 60,9                             |
| Control      | V298-16_3     | 90                               | 0                    | 8,2                              |
| Control      | V298-17_1     | 90                               | 2                    | 23,1                             |
| Control      | V298-17_2     | 90                               | 12                   | 159,7                            |
| Control      | V298-17_3     | 90                               | 11                   | 136,4                            |
| Control      | V308-17_1     | 90                               | 3                    | 41,6                             |
| Control      | V308-17_2     | 90                               | 10                   | 162,6                            |
| Control      | V308-17_3     | 90                               | 7                    | 88,2                             |
| Control      | V308-17_4     | 90                               | 6                    | 118,7                            |
| Control      | V308-18_1     | 90                               | 1                    | 28,3                             |
| Control      | V308-18_2     | 90                               | 5                    | 65,2                             |
| Control      | V308-18_3     | 90                               | 9                    | 112,5                            |
| CIMT         | V211-10_1     | 90                               | 16                   | 231,6                            |
| CIMT         | V211-10_2     | 90                               | 9                    | 101,6                            |
| CIMT         | V211-11_1     | 90                               | 2                    | 37,6                             |
| CIMT         | V211-11_2     | 90                               | 1                    | 10,7                             |
| CIMT         | V211-12_1     | 90                               | 3                    | 73,3                             |
| CIMT         | V211-13_1     | 90                               | 3                    | 51,7                             |
| CIMT         | V211-13_2     | 90                               | 6                    | 84                               |

|            |           |    |    |       |
|------------|-----------|----|----|-------|
| CIMT       | V211-15_1 | 90 | 0  | 7,8   |
| CIMT       | V211-15_2 | 90 | 2  | 48,4  |
| CIMT       | V211-16_1 | 90 | 6  | 127,4 |
| CIMT       | V212-14_1 | 90 | 9  | 120,5 |
| CIMT       | V212-14_2 | 90 | 10 | 149,7 |
| CIMT       | V212-15_1 | 90 | 12 | 146,6 |
| CIMT       | V212-18_1 | 90 | 3  | 45,1  |
| CIMT       | V212-21_1 | 90 | 5  | 61,1  |
| CIMT       | V212-21_2 | 90 | 17 | 207,4 |
| CIMT       | V212-22_1 | 90 | 5  | 109,8 |
| CIMT       | V212-23_1 | 90 | 4  | 74,6  |
| CIMT       | V212-23_2 | 90 | 22 | 351,8 |
| CIMT       | V212-24_1 | 90 | 7  | 130,9 |
| CIMT       | V218-9_1  | 90 | 1  | 43    |
| CIMT       | V218-10_1 | 90 | 11 | 133,1 |
| CIMT       | V218-11_1 | 90 | 11 | 161,1 |
| CIMT       | V218-12_1 | 90 | 7  | 104,9 |
| CIMT       | V218-12_2 | 90 | 4  | 83,7  |
| CIMT       | V218-15_1 | 90 | 1  | 40,5  |
| CIMT       | V218-17_1 | 90 | 6  | 70,2  |
| CIMT       | V299-14_1 | 90 | 2  | 35,2  |
| CIMT       | V299-16_1 | 90 | 0  | 8,5   |
| CIMT       | V299-16_2 | 90 | 7  | 142,1 |
| CIMT       | V299-17_1 | 90 | 7  | 108,1 |
| CIMT       | V299-17_2 | 90 | 4  | 51,1  |
| CIMT       | V300-16_1 | 90 | 9  | 96,3  |
| CIMT       | V300-18_1 | 90 | 2  | 42,4  |
| CIMT       | V300-18_2 | 90 | 5  | 74,1  |
| CIMT       | V300-20_1 | 90 | 4  | 50,3  |
| CIMT       | V300-22_1 | 90 | 8  | 105,3 |
| CIMT       | V300-23_1 | 90 | 1  | 24,1  |
| CIMT       | V300-23_2 | 90 | 1  | 18,1  |
| CIMT       | V309-15_1 | 90 | 1  | 59,2  |
| CIMT       | V309-15_2 | 90 | 3  | 34    |
| CIMT       | V309-16_1 | 90 | 4  | 77,4  |
| CIMT       | V309-16_3 | 90 | 7  | 90,3  |
| CIMT       | V309-17_1 | 90 | 7  | 67,4  |
| CIMT       | V309-17_2 | 90 | 10 | 118,4 |
| CIMT+G-CSF | V213-13_1 | 90 | 3  | 31,8  |
| CIMT+G-CSF | V213-16_1 | 90 | 0  | 7,9   |
| CIMT+G-CSF | V213-17_1 | 90 | 5  | 73,1  |
| CIMT+G-CSF | V213-17_2 | 90 | 6  | 72,1  |
| CIMT+G-CSF | V213-18_1 | 90 | 6  | 84,2  |
| CIMT+G-CSF | V213-18_2 | 90 | 4  | 38,3  |
| CIMT+G-CSF | V213-19_1 | 90 | 8  | 107,3 |
| CIMT+G-CSF | V213-19_2 | 90 | 2  | 25,5  |
| CIMT+G-CSF | V213-20_1 | 90 | 2  | 29    |
| CIMT+G-CSF | V213-22_1 | 90 | 8  | 87,2  |
| CIMT+G-CSF | V213-23_1 | 90 | 1  | 33,4  |
| CIMT+G-CSF | V214-14_1 | 90 | 12 | 177   |
| CIMT+G-CSF | V214-17_1 | 90 | 6  | 79,5  |
| CIMT+G-CSF | V214-18_1 | 90 | 19 | 310,7 |
| CIMT+G-CSF | V214-19_1 | 90 | 4  | 47,2  |
| CIMT+G-CSF | V214-19_2 | 90 | 7  | 99    |
| CIMT+G-CSF | V214-20_1 | 90 | 9  | 102   |
| CIMT+G-CSF | V214-21_1 | 90 | 6  | 90,2  |

|            |           |    |    |       |
|------------|-----------|----|----|-------|
| CIMT+G-CSF | V217-1_1  | 90 | 15 | 211,7 |
| CIMT+G-CSF | V217-2_1  | 90 | 5  | 87,4  |
| CIMT+G-CSF | V217-4_1  | 90 | 25 | 372,4 |
| CIMT+G-CSF | V217-6_1  | 90 | 3  | 43,7  |
| CIMT+G-CSF | V217-6_3  | 90 | 6  | 126,4 |
| CIMT+G-CSF | V217-8_4  | 90 | 9  | 117,5 |
| CIMT+G-CSF | V217-10_1 | 90 | 1  | 12,4  |
| CIMT+G-CSF | V217-11_1 | 90 | 10 | 134,6 |
| CIMT+G-CSF | V304-16_1 | 90 | 0  | 4,5   |
| CIMT+G-CSF | V304-17_1 | 90 | 3  | 53,3  |
| CIMT+G-CSF | V304-17_2 | 90 | 3  | 29,9  |
| CIMT+G-CSF | V304-17_3 | 90 | 4  | 41,7  |
| CIMT+G-CSF | V304-17_4 | 90 | 6  | 128,8 |
| CIMT+G-CSF | V304-19_1 | 90 | 1  | 25,1  |
| CIMT+G-CSF | V304-19_2 | 90 | 4  | 44,5  |
| CIMT+G-CSF | V305-17_3 | 90 | 0  | 4,3   |
| CIMT+G-CSF | V305-18_1 | 90 | 4  | 54,7  |
| CIMT+G-CSF | V305-18_2 | 90 | 1  | 10,2  |
| CIMT+G-CSF | V305-18_4 | 90 | 1  | 18,3  |
| CIMT/G-CSF | V306-16_1 | 90 | 4  | 59,5  |
| CIMT/G-CSF | V306-16_2 | 90 | 1  | 11,3  |
| CIMT/G-CSF | V306-17_1 | 90 | 5  | 68,7  |
| CIMT/G-CSF | V306-17_2 | 90 | 9  | 124,9 |
| CIMT/G-CSF | V306-17_3 | 90 | 3  | 33,4  |
| CIMT/G-CSF | V306-17_4 | 90 | 2  | 21,1  |
| CIMT/G-CSF | V306-17_5 | 90 | 0  | 0,4   |
| CIMT/G-CSF | V311-16_1 | 90 | 13 | 190,3 |
| CIMT/G-CSF | V311-17_1 | 90 | 7  | 134,7 |
| CIMT/G-CSF | V311-17_2 | 90 | 4  | 49,9  |
| CIMT/G-CSF | V311-19_1 | 90 | 7  | 91,4  |
| CIMT/G-CSF | V311-20_1 | 90 | 13 | 218   |
| CIMT/G-CSF | V311-20_2 | 90 | 4  | 45,1  |
| CIMT/G-CSF | V311-20_3 | 90 | 5  | 58,1  |
| CIMT/G-CSF | V313-14_1 | 90 | 5  | 62,2  |
| CIMT/G-CSF | V313-15_2 | 90 | 1  | 23,5  |
| CIMT/G-CSF | V313-17_1 | 90 | 8  | 108,7 |
| CIMT/G-CSF | V313-17_2 | 90 | 1  | 11,1  |
| CIMT/G-CSF | V313-17_3 | 90 | 0  | 0     |
| CIMT/G-CSF | V313-19_1 | 90 | 1  | 10,8  |
| CIMT/G-CSF | V314-16_2 | 90 | 5  | 118,1 |
| CIMT/G-CSF | V314-17_1 | 90 | 2  | 37,4  |
| CIMT/G-CSF | V314-17_3 | 90 | 1  | 16,4  |
| CIMT/G-CSF | V314-18_1 | 90 | 1  | 21,9  |
| CIMT/G-CSF | V314-18_2 | 90 | 5  | 72,5  |
| CIMT/G-CSF | V315-11_1 | 90 | 4  | 50,5  |
| CIMT/G-CSF | V315-11_2 | 90 | 2  | 22    |
| CIMT/G-CSF | V315-13_1 | 90 | 2  | 56,1  |
| CIMT/G-CSF | V315-13_2 | 90 | 15 | 203   |
| CIMT/G-CSF | V315-14_1 | 90 | 5  | 66,3  |
| CIMT/G-CSF | V315-14_2 | 90 | 5  | 62,8  |
| CIMT/G-CSF | V315-14_3 | 90 | 16 | 257,7 |
| G-CSF      | V220-9_1  | 90 | 8  | 87,6  |
| G-CSF      | V220-12_1 | 90 | 4  | 47,1  |
| G-CSF      | V220-16_1 | 90 | 15 | 186,2 |
| G-CSF      | V220-16_2 | 90 | 1  | 13,2  |
| G-CSF      | V220-17_1 | 90 | 9  | 141   |

|       |           |    |    |       |
|-------|-----------|----|----|-------|
| G-CSF | V220-18_1 | 90 | 3  | 62,4  |
| G-CSF | V221-2_1  | 90 | 6  | 75,1  |
| G-CSF | V221-6_1  | 90 | 5  | 74,8  |
| G-CSF | V221-7_1  | 90 | 5  | 57    |
| G-CSF | V221-7_2  | 90 | 10 | 134,2 |
| G-CSF | V221-11_1 | 90 | 2  | 20,8  |
| G-CSF | V221-13_1 | 90 | 19 | 253,6 |
| G-CSF | V221-15_1 | 90 | 1  | 10,1  |
| G-CSF | V221-20_1 | 90 | 3  | 37,2  |
| G-CSF | V222-19_1 | 90 | 13 | 158,5 |
| G-CSF | V222-19_2 | 90 | 1  | 22,3  |
| G-CSF | V222-20_1 | 90 | 16 | 240,9 |
| G-CSF | V222-20_2 | 90 | 7  | 80,1  |
| G-CSF | V222-21_1 | 90 | 11 | 134,7 |
| G-CSF | V222-22_1 | 90 | 6  | 98,1  |
| G-CSF | V222-22_2 | 90 | 7  | 87,9  |
| G-CSF | V222-23_1 | 90 | 11 | 150,2 |
| G-CSF | V222-24_1 | 90 | 8  | 117,3 |
| G-CSF | V301-18_1 | 90 | 1  | 23,2  |
| G-CSF | V301-18_2 | 90 | 4  | 52,1  |
| G-CSF | V301-18_3 | 90 | 1  | 13,2  |
| G-CSF | V301-19_1 | 90 | 4  | 47,7  |
| G-CSF | V301-19_2 | 90 | 3  | 46,4  |
| G-CSF | V301-20_1 | 90 | 4  | 45,9  |
| G-CSF | V301-20_2 | 90 | 5  | 95    |
| G-CSF | V302-15_1 | 90 | 1  | 12,5  |
| G-CSF | V302-15_2 | 90 | 2  | 35,8  |
| G-CSF | V302-15_3 | 90 | 2  | 39,2  |
| G-CSF | V302-16_1 | 90 | 1  | 10,2  |
| G-CSF | V302-16_3 | 90 | 0  | 15,5  |
| G-CSF | V302-16_4 | 90 | 7  | 71,4  |
| G-CSF | V302-17_1 | 90 | 15 | 234   |
| G-CSF | V302-17_2 | 90 | 2  | 24,7  |
| G-CSF | V302-17_3 | 90 | 1  | 14,9  |
| G-CSF | V303-15_2 | 90 | 2  | 47,8  |
| G-CSF | V303-15_3 | 90 | 7  | 92,5  |
| G-CSF | V303-16_1 | 90 | 13 | 179,9 |
| G-CSF | V303-16_2 | 90 | 4  | 70,7  |
| G-CSF | V303-16_3 | 90 | 2  | 30,8  |
| G-CSF | V303-17_1 | 90 | 14 | 184,9 |

#### basilar dendrite Sholl 100 $\mu$ m

| Group   | number    | Radius( $\mu$ m) | Intersections | Length( $\mu$ m) |
|---------|-----------|------------------|---------------|------------------|
| Control | V215-10_2 | 100              | 14            | 167,6            |
| Control | V215-11_1 | 100              | 0             | 7,9              |
| Control | V215-12_1 | 100              | 3             | 36,6             |
| Control | V215-12_2 | 100              | 7             | 88,2             |
| Control | V215-13_1 | 100              | 3             | 78               |
| Control | V215-15_2 | 100              | 2             | 77,7             |
| Control | V215-16_1 | 100              | 4             | 49,7             |
| Control | V215-18_1 | 100              | 1             | 23,9             |
| Control | V216-11_1 | 100              | 2             | 28,4             |
| Control | V216-13_1 | 100              | 0             | 2,8              |
| Control | V216-14_1 | 100              | 1             | 10,1             |

|         |           |     |    |       |
|---------|-----------|-----|----|-------|
| Control | V216-16_2 | 100 | 6  | 66,4  |
| Control | V216-17_1 | 100 | 1  | 17,7  |
| Control | V216-18_2 | 100 | 4  | 50    |
| Control | V219-6_1  | 100 | 23 | 297,5 |
| Control | V219-11_1 | 100 | 8  | 130,5 |
| Control | V219-12_1 | 100 | 7  | 115,2 |
| Control | V219-13_1 | 100 | 3  | 22,3  |
| Control | V219-14_2 | 100 | 4  | 56    |
| Control | V219-16_1 | 100 | 2  | 40,2  |
| Control | V297-19_1 | 100 | 6  | 98,4  |
| Control | V297-19_2 | 100 | 0  | 0,6   |
| Control | V297-20_2 | 100 | 1  | 14,8  |
| Control | V297-20_3 | 100 | 7  | 89,7  |
| Control | V297-22_1 | 100 | 11 | 132,9 |
| Control | V298-15_1 | 100 | 11 | 190,1 |
| Control | V298-16_2 | 100 | 3  | 42,4  |
| Control | V298-17_1 | 100 | 1  | 11,7  |
| Control | V298-17_2 | 100 | 8  | 128,7 |
| Control | V298-17_3 | 100 | 11 | 146,3 |
| Control | V308-17_1 | 100 | 3  | 37,1  |
| Control | V308-17_2 | 100 | 8  | 129,4 |
| Control | V308-17_3 | 100 | 8  | 87,9  |
| Control | V308-17_4 | 100 | 5  | 98,1  |
| Control | V308-18_1 | 100 | 0  | 6,5   |
| Control | V308-18_2 | 100 | 1  | 58,4  |
| Control | V308-18_3 | 100 | 8  | 115,6 |
| CIMT    | V211-10_1 | 100 | 16 | 190   |
| CIMT    | V211-10_2 | 100 | 10 | 110,9 |
| CIMT    | V211-11_1 | 100 | 2  | 26,5  |
| CIMT    | V211-11_2 | 100 | 1  | 10,5  |
| CIMT    | V211-12_1 | 100 | 1  | 27,2  |
| CIMT    | V211-13_1 | 100 | 3  | 32,6  |
| CIMT    | V211-13_2 | 100 | 5  | 59,1  |
| CIMT    | V211-15_2 | 100 | 1  | 19,2  |
| CIMT    | V211-16_1 | 100 | 4  | 57,4  |
| CIMT    | V212-14_1 | 100 | 7  | 101,5 |
| CIMT    | V212-14_2 | 100 | 10 | 123,4 |
| CIMT    | V212-15_1 | 100 | 11 | 137,7 |
| CIMT    | V212-18_1 | 100 | 3  | 35,7  |
| CIMT    | V212-21_1 | 100 | 5  | 52,4  |
| CIMT    | V212-21_2 | 100 | 18 | 238,4 |
| CIMT    | V212-22_1 | 100 | 4  | 60,9  |
| CIMT    | V212-23_1 | 100 | 3  | 42,4  |
| CIMT    | V212-23_2 | 100 | 24 | 368,2 |
| CIMT    | V212-24_1 | 100 | 4  | 62,8  |
| CIMT    | V218-9_1  | 100 | 1  | 10    |
| CIMT    | V218-10_1 | 100 | 7  | 155,7 |
| CIMT    | V218-11_1 | 100 | 11 | 144,1 |
| CIMT    | V218-12_1 | 100 | 11 | 110,1 |
| CIMT    | V218-12_2 | 100 | 2  | 34,2  |
| CIMT    | V218-15_1 | 100 | 1  | 10,1  |
| CIMT    | V218-17_1 | 100 | 5  | 63,9  |
| CIMT    | V299-14_1 | 100 | 2  | 25,2  |
| CIMT    | V299-16_2 | 100 | 10 | 154,9 |
| CIMT    | V299-17_1 | 100 | 7  | 101,4 |
| CIMT    | V299-17_2 | 100 | 2  | 37,2  |



|            |           |     |    |       |
|------------|-----------|-----|----|-------|
| CIMT       | V300-16_1 | 100 | 8  | 100,9 |
| CIMT       | V300-18_1 | 100 | 2  | 21    |
| CIMT       | V300-18_2 | 100 | 7  | 63,9  |
| CIMT       | V300-20_1 | 100 | 4  | 47,1  |
| CIMT       | V300-22_1 | 100 | 7  | 98,5  |
| CIMT       | V300-23_1 | 100 | 1  | 10,8  |
| CIMT       | V300-23_2 | 100 | 1  | 14,8  |
| CIMT       | V309-15_1 | 100 | 1  | 11,3  |
| CIMT       | V309-15_2 | 100 | 3  | 34    |
| CIMT       | V309-16_1 | 100 | 0  | 24,1  |
| CIMT       | V309-16_3 | 100 | 7  | 98    |
| CIMT       | V309-17_1 | 100 | 3  | 138,7 |
| CIMT       | V309-17_2 | 100 | 10 | 112,3 |
| CIMT+G-CSF | V213-13_1 | 100 | 3  | 32,2  |
| CIMT+G-CSF | V213-17_1 | 100 | 3  | 53,8  |
| CIMT+G-CSF | V213-17_2 | 100 | 6  | 68,7  |
| CIMT+G-CSF | V213-18_1 | 100 | 6  | 134,1 |
| CIMT+G-CSF | V213-18_2 | 100 | 4  | 47,6  |
| CIMT+G-CSF | V213-19_1 | 100 | 5  | 84,1  |
| CIMT+G-CSF | V213-19_2 | 100 | 1  | 21,4  |
| CIMT+G-CSF | V213-20_1 | 100 | 0  | 9     |
| CIMT+G-CSF | V213-22_1 | 100 | 8  | 88,9  |
| CIMT+G-CSF | V213-23_1 | 100 | 1  | 11,5  |
| CIMT+G-CSF | V214-14_1 | 100 | 8  | 125,8 |
| CIMT+G-CSF | V214-17_1 | 100 | 6  | 81,5  |
| CIMT+G-CSF | V214-18_1 | 100 | 14 | 232   |
| CIMT+G-CSF | V214-19_1 | 100 | 1  | 24,1  |
| CIMT+G-CSF | V214-19_2 | 100 | 6  | 75,5  |
| CIMT+G-CSF | V214-20_1 | 100 | 8  | 92,2  |
| CIMT+G-CSF | V214-21_1 | 100 | 6  | 70,2  |
| CIMT+G-CSF | V217-1_1  | 100 | 13 | 169,1 |
| CIMT+G-CSF | V217-2_1  | 100 | 5  | 68,8  |
| CIMT+G-CSF | V217-4_1  | 100 | 23 | 322,3 |
| CIMT+G-CSF | V217-6_1  | 100 | 1  | 25,4  |
| CIMT+G-CSF | V217-6_3  | 100 | 3  | 89,2  |
| CIMT+G-CSF | V217-8_4  | 100 | 8  | 106,2 |
| CIMT+G-CSF | V217-10_1 | 100 | 1  | 14,6  |
| CIMT+G-CSF | V217-11_1 | 100 | 11 | 143,5 |
| CIMT+G-CSF | V304-17_1 | 100 | 1  | 12,2  |
| CIMT+G-CSF | V304-17_2 | 100 | 2  | 26,8  |
| CIMT+G-CSF | V304-17_3 | 100 | 3  | 43,8  |
| CIMT+G-CSF | V304-17_4 | 100 | 5  | 68,9  |
| CIMT+G-CSF | V304-19_1 | 100 | 1  | 10,8  |
| CIMT+G-CSF | V304-19_2 | 100 | 3  | 36,5  |
| CIMT+G-CSF | V305-18_1 | 100 | 3  | 45,5  |
| CIMT+G-CSF | V305-18_2 | 100 | 1  | 10,3  |
| CIMT+G-CSF | V305-18_4 | 100 | 1  | 12,5  |
| CIMT/G-CSF | V306-16_1 | 100 | 1  | 24,4  |
| CIMT/G-CSF | V306-16_2 | 100 | 1  | 13,6  |
| CIMT/G-CSF | V306-17_1 | 100 | 5  | 63,1  |
| CIMT/G-CSF | V306-17_2 | 100 | 5  | 69,7  |
| CIMT/G-CSF | V306-17_3 | 100 | 3  | 34,6  |
| CIMT/G-CSF | V306-17_4 | 100 | 1  | 14,1  |
| CIMT/G-CSF | V311-16_1 | 100 | 13 | 157,2 |
| CIMT/G-CSF | V311-17_1 | 100 | 6  | 86,1  |
| CIMT/G-CSF | V311-17_2 | 100 | 4  | 51,7  |

|            |           |     |    |       |
|------------|-----------|-----|----|-------|
| CIMT/G-CSF | V311-19_1 | 100 | 6  | 98,4  |
| CIMT/G-CSF | V311-20_1 | 100 | 11 | 148,9 |
| CIMT/G-CSF | V311-20_2 | 100 | 4  | 41,7  |
| CIMT/G-CSF | V311-20_3 | 100 | 4  | 56,6  |
| CIMT/G-CSF | V313-14_1 | 100 | 5  | 73    |
| CIMT/G-CSF | V313-15_2 | 100 | 0  | 9,7   |
| CIMT/G-CSF | V313-17_1 | 100 | 8  | 108,3 |
| CIMT/G-CSF | V313-17_2 | 100 | 1  | 15,1  |
| CIMT/G-CSF | V313-19_1 | 100 | 0  | 2,6   |
| CIMT/G-CSF | V314-16_2 | 100 | 5  | 95,8  |
| CIMT/G-CSF | V314-17_1 | 100 | 2  | 23,3  |
| CIMT/G-CSF | V314-17_3 | 100 | 1  | 20    |
| CIMT/G-CSF | V314-18_1 | 100 | 1  | 13,9  |
| CIMT/G-CSF | V314-18_2 | 100 | 6  | 86,1  |
| CIMT/G-CSF | V315-11_1 | 100 | 3  | 42,9  |
| CIMT/G-CSF | V315-11_2 | 100 | 0  | 18    |
| CIMT/G-CSF | V315-13_1 | 100 | 1  | 19,2  |
| CIMT/G-CSF | V315-13_2 | 100 | 12 | 158   |
| CIMT/G-CSF | V315-14_1 | 100 | 3  | 50,6  |
| CIMT/G-CSF | V315-14_2 | 100 | 3  | 48,8  |
| CIMT/G-CSF | V315-14_3 | 100 | 14 | 213,7 |
| G-CSF      | V220-9_1  | 100 | 6  | 139,9 |
| G-CSF      | V220-12_1 | 100 | 2  | 36,4  |
| G-CSF      | V220-16_1 | 100 | 11 | 194,3 |
| G-CSF      | V220-16_2 | 100 | 1  | 11,4  |
| G-CSF      | V220-17_1 | 100 | 8  | 140,5 |
| G-CSF      | V220-18_1 | 100 | 2  | 23,4  |
| G-CSF      | V221-2_1  | 100 | 5  | 59,4  |
| G-CSF      | V221-6_1  | 100 | 3  | 41,4  |
| G-CSF      | V221-7_1  | 100 | 3  | 39,5  |
| G-CSF      | V221-7_2  | 100 | 6  | 112,1 |
| G-CSF      | V221-11_1 | 100 | 0  | 2,8   |
| G-CSF      | V221-13_1 | 100 | 15 | 205,2 |
| G-CSF      | V221-15_1 | 100 | 1  | 10,1  |
| G-CSF      | V221-20_1 | 100 | 2  | 24    |
| G-CSF      | V222-19_1 | 100 | 12 | 155   |
| G-CSF      | V222-19_2 | 100 | 0  | 2,5   |
| G-CSF      | V222-20_1 | 100 | 10 | 220,8 |
| G-CSF      | V222-20_2 | 100 | 5  | 67,6  |
| G-CSF      | V222-21_1 | 100 | 10 | 142,5 |
| G-CSF      | V222-22_1 | 100 | 4  | 85,3  |
| G-CSF      | V222-22_2 | 100 | 6  | 76,8  |
| G-CSF      | V222-23_1 | 100 | 11 | 136,3 |
| G-CSF      | V222-24_1 | 100 | 8  | 104,1 |
| G-CSF      | V301-18_1 | 100 | 0  | 6,7   |
| G-CSF      | V301-18_2 | 100 | 3  | 34,2  |
| G-CSF      | V301-18_3 | 100 | 1  | 11    |
| G-CSF      | V301-19_1 | 100 | 2  | 28,3  |
| G-CSF      | V301-19_2 | 100 | 1  | 33    |
| G-CSF      | V301-20_1 | 100 | 2  | 30,7  |
| G-CSF      | V301-20_2 | 100 | 1  | 28,2  |
| G-CSF      | V302-15_1 | 100 | 1  | 10,6  |
| G-CSF      | V302-15_2 | 100 | 2  | 23,7  |
| G-CSF      | V302-15_3 | 100 | 3  | 35,2  |
| G-CSF      | V302-16_1 | 100 | 1  | 10,4  |
| G-CSF      | V302-16_4 | 100 | 5  | 64,3  |

|       |           |     |    |       |
|-------|-----------|-----|----|-------|
| G-CSF | V302-17_1 | 100 | 13 | 201,5 |
| G-CSF | V302-17_2 | 100 | 1  | 21,9  |
| G-CSF | V302-17_3 | 100 | 0  | 4,3   |
| G-CSF | V303-15_2 | 100 | 2  | 25,6  |
| G-CSF | V303-15_3 | 100 | 6  | 87,9  |
| G-CSF | V303-16_1 | 100 | 12 | 150,6 |
| G-CSF | V303-16_2 | 100 | 4  | 48,8  |
| G-CSF | V303-16_3 | 100 | 2  | 27,8  |
| G-CSF | V303-17_1 | 100 | 12 | 162,4 |

**basilar dendrite Sholl 110µm**

| Group   | number    | Radius(µm) | Intersections | Length(µm) |
|---------|-----------|------------|---------------|------------|
| Control | V215-10_2 | 110        | 10            | 129        |
| Control | V215-12_1 | 110        | 3             | 46,2       |
| Control | V215-12_2 | 110        | 4             | 72,1       |
| Control | V215-13_1 | 110        | 2             | 50,4       |
| Control | V215-15_2 | 110        | 1             | 11,5       |
| Control | V215-16_1 | 110        | 3             | 43,5       |
| Control | V215-18_1 | 110        | 0             | 8,4        |
| Control | V216-11_1 | 110        | 2             | 20,3       |
| Control | V216-14_1 | 110        | 1             | 11,4       |
| Control | V216-16_2 | 110        | 3             | 61,9       |
| Control | V216-17_1 | 110        | 1             | 14,7       |
| Control | V216-18_2 | 110        | 3             | 41,4       |
| Control | V219-6_1  | 110        | 14            | 273,7      |
| Control | V219-11_1 | 110        | 6             | 77,3       |
| Control | V219-12_1 | 110        | 7             | 96,2       |
| Control | V219-13_1 | 110        | 3             | 20         |
| Control | V219-14_2 | 110        | 5             | 47,8       |
| Control | V219-16_1 | 110        | 1             | 20,3       |
| Control | V297-19_1 | 110        | 4             | 80,4       |
| Control | V297-20_2 | 110        | 0             | 2,3        |
| Control | V297-20_3 | 110        | 6             | 87,2       |
| Control | V297-22_1 | 110        | 11            | 128,8      |
| Control | V298-15_1 | 110        | 9             | 115        |
| Control | V298-16_2 | 110        | 1             | 24,5       |
| Control | V298-17_1 | 110        | 0             | 14,1       |
| Control | V298-17_2 | 110        | 7             | 85,5       |
| Control | V298-17_3 | 110        | 9             | 121,8      |
| Control | V308-17_1 | 110        | 1             | 33,9       |
| Control | V308-17_2 | 110        | 9             | 98,2       |
| Control | V308-17_3 | 110        | 6             | 76,6       |
| Control | V308-17_4 | 110        | 3             | 62,4       |
| Control | V308-18_2 | 110        | 1             | 17,4       |
| Control | V308-18_3 | 110        | 8             | 122        |
| CIMT    | V211-10_1 | 110        | 14            | 168,6      |
| CIMT    | V211-10_2 | 110        | 8             | 131,3      |
| CIMT    | V211-11_1 | 110        | 3             | 26,8       |
| CIMT    | V211-11_2 | 110        | 0             | 12,1       |
| CIMT    | V211-12_1 | 110        | 1             | 12,4       |
| CIMT    | V211-13_1 | 110        | 2             | 34,4       |
| CIMT    | V211-13_2 | 110        | 4             | 60,1       |
| CIMT    | V211-15_2 | 110        | 1             | 11         |
| CIMT    | V211-16_1 | 110        | 2             | 35,2       |

|            |           |     |    |       |
|------------|-----------|-----|----|-------|
| CIMT       | V212-14_1 | 110 | 8  | 85,9  |
| CIMT       | V212-14_2 | 110 | 10 | 121,9 |
| CIMT       | V212-15_1 | 110 | 9  | 128,4 |
| CIMT       | V212-18_1 | 110 | 3  | 36,8  |
| CIMT       | V212-21_1 | 110 | 4  | 50    |
| CIMT       | V212-21_2 | 110 | 15 | 232,9 |
| CIMT       | V212-22_1 | 110 | 4  | 56,5  |
| CIMT       | V212-23_1 | 110 | 2  | 23,4  |
| CIMT       | V212-23_2 | 110 | 25 | 361,1 |
| CIMT       | V212-24_1 | 110 | 3  | 45,2  |
| CIMT       | V218-9_1  | 110 | 0  | 6,5   |
| CIMT       | V218-10_1 | 110 | 6  | 73,7  |
| CIMT       | V218-11_1 | 110 | 11 | 150,3 |
| CIMT       | V218-12_1 | 110 | 11 | 199,2 |
| CIMT       | V218-12_2 | 110 | 2  | 25    |
| CIMT       | V218-15_1 | 110 | 0  | 4,3   |
| CIMT       | V218-17_1 | 110 | 3  | 55,1  |
| CIMT       | V299-14_1 | 110 | 1  | 23    |
| CIMT       | V299-16_2 | 110 | 6  | 112   |
| CIMT       | V299-17_1 | 110 | 6  | 73    |
| CIMT       | V299-17_2 | 110 | 2  | 21,3  |
| CIMT       | V300-16_1 | 110 | 9  | 115,1 |
| CIMT       | V300-18_1 | 110 | 1  | 17,8  |
| CIMT       | V300-18_2 | 110 | 6  | 72,1  |
| CIMT       | V300-20_1 | 110 | 3  | 49,8  |
| CIMT       | V300-22_1 | 110 | 7  | 76,5  |
| CIMT       | V300-23_1 | 110 | 1  | 12    |
| CIMT       | V300-23_2 | 110 | 0  | 5     |
| CIMT       | V309-15_1 | 110 | 1  | 10,7  |
| CIMT       | V309-15_2 | 110 | 3  | 36,6  |
| CIMT       | V309-16_3 | 110 | 5  | 79,2  |
| CIMT       | V309-17_1 | 110 | 3  | 26,6  |
| CIMT       | V309-17_2 | 110 | 10 | 118,7 |
| CIMT+G-CSF | V213-13_1 | 110 | 3  | 31    |
| CIMT+G-CSF | V213-17_1 | 110 | 2  | 51,7  |
| CIMT+G-CSF | V213-17_2 | 110 | 5  | 63,1  |
| CIMT+G-CSF | V213-18_1 | 110 | 4  | 78,7  |
| CIMT+G-CSF | V213-18_2 | 110 | 4  | 48,1  |
| CIMT+G-CSF | V213-19_1 | 110 | 5  | 68,3  |
| CIMT+G-CSF | V213-19_2 | 110 | 1  | 11    |
| CIMT+G-CSF | V213-22_1 | 110 | 5  | 73,6  |
| CIMT+G-CSF | V213-23_1 | 110 | 1  | 12,1  |
| CIMT+G-CSF | V214-14_1 | 110 | 7  | 120,5 |
| CIMT+G-CSF | V214-17_1 | 110 | 6  | 84,6  |
| CIMT+G-CSF | V214-18_1 | 110 | 12 | 154,1 |
| CIMT+G-CSF | V214-19_1 | 110 | 1  | 10,3  |
| CIMT+G-CSF | V214-19_2 | 110 | 5  | 71,6  |
| CIMT+G-CSF | V214-20_1 | 110 | 8  | 106,8 |
| CIMT+G-CSF | V214-21_1 | 110 | 4  | 53,1  |
| CIMT+G-CSF | V217-1_1  | 110 | 13 | 175,3 |
| CIMT+G-CSF | V217-2_1  | 110 | 4  | 66,4  |
| CIMT+G-CSF | V217-4_1  | 110 | 20 | 275,6 |
| CIMT+G-CSF | V217-6_1  | 110 | 0  | 3,2   |
| CIMT+G-CSF | V217-6_3  | 110 | 2  | 32,4  |
| CIMT+G-CSF | V217-8_4  | 110 | 4  | 67,6  |
| CIMT+G-CSF | V217-10_1 | 110 | 1  | 14,3  |

|            |           |     |    |       |
|------------|-----------|-----|----|-------|
| CIMT+G-CSF | V217-11_1 | 110 | 11 | 170,8 |
| CIMT+G-CSF | V304-17_1 | 110 | 0  | 1,1   |
| CIMT+G-CSF | V304-17_2 | 110 | 2  | 21,4  |
| CIMT+G-CSF | V304-17_3 | 110 | 3  | 35,4  |
| CIMT+G-CSF | V304-17_4 | 110 | 6  | 60,8  |
| CIMT+G-CSF | V304-19_1 | 110 | 1  | 11,6  |
| CIMT+G-CSF | V304-19_2 | 110 | 2  | 33,9  |
| CIMT+G-CSF | V305-18_1 | 110 | 3  | 34,9  |
| CIMT+G-CSF | V305-18_2 | 110 | 0  | 11,8  |
| CIMT+G-CSF | V305-18_4 | 110 | 1  | 14,1  |
| CIMT/G-CSF | V306-16_1 | 110 | 1  | 11    |
| CIMT/G-CSF | V306-16_2 | 110 | 0  | 2,1   |
| CIMT/G-CSF | V306-17_1 | 110 | 5  | 56,7  |
| CIMT/G-CSF | V306-17_2 | 110 | 3  | 58,1  |
| CIMT/G-CSF | V306-17_3 | 110 | 1  | 20,7  |
| CIMT/G-CSF | V306-17_4 | 110 | 1  | 12,5  |
| CIMT/G-CSF | V311-16_1 | 110 | 13 | 161,2 |
| CIMT/G-CSF | V311-17_1 | 110 | 4  | 56,6  |
| CIMT/G-CSF | V311-17_2 | 110 | 4  | 47,1  |
| CIMT/G-CSF | V311-19_1 | 110 | 4  | 73,2  |
| CIMT/G-CSF | V311-20_1 | 110 | 8  | 102,9 |
| CIMT/G-CSF | V311-20_2 | 110 | 4  | 43,9  |
| CIMT/G-CSF | V311-20_3 | 110 | 3  | 46,8  |
| CIMT/G-CSF | V313-14_1 | 110 | 5  | 65,2  |
| CIMT/G-CSF | V313-17_1 | 110 | 6  | 80,3  |
| CIMT/G-CSF | V313-17_2 | 110 | 1  | 10,9  |
| CIMT/G-CSF | V314-16_2 | 110 | 3  | 53,2  |
| CIMT/G-CSF | V314-17_1 | 110 | 1  | 20    |
| CIMT/G-CSF | V314-17_3 | 110 | 0  | 7,3   |
| CIMT/G-CSF | V314-18_1 | 110 | 1  | 19,3  |
| CIMT/G-CSF | V314-18_2 | 110 | 4  | 91,2  |
| CIMT/G-CSF | V315-11_1 | 110 | 3  | 36,6  |
| CIMT/G-CSF | V315-13_1 | 110 | 1  | 11,6  |
| CIMT/G-CSF | V315-13_2 | 110 | 9  | 128,2 |
| CIMT/G-CSF | V315-14_1 | 110 | 4  | 59,8  |
| CIMT/G-CSF | V315-14_2 | 110 | 2  | 28,7  |
| CIMT/G-CSF | V315-14_3 | 110 | 13 | 176   |
| G-CSF      | V220-9_1  | 110 | 6  | 112,8 |
| G-CSF      | V220-12_1 | 110 | 1  | 12,3  |
| G-CSF      | V220-16_1 | 110 | 11 | 134,7 |
| G-CSF      | V220-16_2 | 110 | 2  | 32,3  |
| G-CSF      | V220-17_1 | 110 | 5  | 87,4  |
| G-CSF      | V220-18_1 | 110 | 2  | 38,9  |
| G-CSF      | V221-2_1  | 110 | 5  | 57,7  |
| G-CSF      | V221-6_1  | 110 | 2  | 30,3  |
| G-CSF      | V221-7_1  | 110 | 2  | 29,7  |
| G-CSF      | V221-7_2  | 110 | 4  | 59,3  |
| G-CSF      | V221-13_1 | 110 | 12 | 169,8 |
| G-CSF      | V221-15_1 | 110 | 1  | 10    |
| G-CSF      | V221-20_1 | 110 | 2  | 21    |
| G-CSF      | V222-19_1 | 110 | 10 | 123,4 |
| G-CSF      | V222-20_1 | 110 | 7  | 134,4 |
| G-CSF      | V222-20_2 | 110 | 5  | 59,7  |
| G-CSF      | V222-21_1 | 110 | 7  | 118   |
| G-CSF      | V222-22_1 | 110 | 3  | 44,4  |
| G-CSF      | V222-22_2 | 110 | 6  | 81,4  |

|       |           |     |    |       |
|-------|-----------|-----|----|-------|
| G-CSF | V222-23_1 | 110 | 11 | 127,3 |
| G-CSF | V222-24_1 | 110 | 7  | 101,9 |
| G-CSF | V301-18_2 | 110 | 3  | 36,4  |
| G-CSF | V301-18_3 | 110 | 0  | 8,4   |
| G-CSF | V301-19_1 | 110 | 1  | 23,5  |
| G-CSF | V301-19_2 | 110 | 0  | 14,1  |
| G-CSF | V301-20_1 | 110 | 0  | 11,2  |
| G-CSF | V301-20_2 | 110 | 1  | 13    |
| G-CSF | V302-15_1 | 110 | 0  | 11,2  |
| G-CSF | V302-15_2 | 110 | 1  | 22,9  |
| G-CSF | V302-15_3 | 110 | 3  | 42,4  |
| G-CSF | V302-16_1 | 110 | 1  | 10,7  |
| G-CSF | V302-16_4 | 110 | 1  | 32,8  |
| G-CSF | V302-17_1 | 110 | 7  | 97,8  |
| G-CSF | V302-17_2 | 110 | 0  | 3,8   |
| G-CSF | V303-15_2 | 110 | 1  | 18,8  |
| G-CSF | V303-15_3 | 110 | 3  | 75,5  |
| G-CSF | V303-16_1 | 110 | 11 | 133   |
| G-CSF | V303-16_2 | 110 | 4  | 43,7  |
| G-CSF | V303-16_3 | 110 | 1  | 19,5  |
| G-CSF | V303-17_1 | 110 | 10 | 112,5 |

**basilar dendrite Sholl 120µm**

| <b>Group</b> | <b>number</b> | <b>Radius(µm)</b> | <b>Intersections</b> | <b>Length(µm)</b> |
|--------------|---------------|-------------------|----------------------|-------------------|
| Control      | V215-10_2     | 120               | 5                    | 110,9             |
| Control      | V215-12_1     | 120               | 4                    | 35,5              |
| Control      | V215-12_2     | 120               | 2                    | 34,6              |
| Control      | V215-13_1     | 120               | 0                    | 12                |
| Control      | V215-15_2     | 120               | 1                    | 10,2              |
| Control      | V215-16_1     | 120               | 3                    | 33,8              |
| Control      | V216-11_1     | 120               | 0                    | 16,8              |
| Control      | V216-14_1     | 120               | 0                    | 1,2               |
| Control      | V216-16_2     | 120               | 3                    | 33,5              |
| Control      | V216-17_1     | 120               | 1                    | 11,5              |
| Control      | V216-18_2     | 120               | 2                    | 26,3              |
| Control      | V219-6_1      | 120               | 12                   | 179               |
| Control      | V219-11_1     | 120               | 4                    | 74,6              |
| Control      | V219-12_1     | 120               | 5                    | 88,9              |
| Control      | V219-13_1     | 120               | 0                    | 21,9              |
| Control      | V219-14_2     | 120               | 3                    | 71,8              |
| Control      | V219-16_1     | 120               | 1                    | 12                |
| Control      | V297-19_1     | 120               | 2                    | 30,6              |
| Control      | V297-20_3     | 120               | 4                    | 57,6              |
| Control      | V297-22_1     | 120               | 10                   | 129,2             |
| Control      | V298-15_1     | 120               | 8                    | 93,9              |
| Control      | V298-16_2     | 120               | 1                    | 10,3              |
| Control      | V298-17_2     | 120               | 6                    | 83,8              |
| Control      | V298-17_3     | 120               | 8                    | 108,4             |
| Control      | V308-17_1     | 120               | 1                    | 13,1              |
| Control      | V308-17_2     | 120               | 6                    | 91,6              |
| Control      | V308-17_3     | 120               | 4                    | 66,1              |
| Control      | V308-17_4     | 120               | 0                    | 19,3              |
| Control      | V308-18_2     | 120               | 1                    | 19,5              |
| Control      | V308-18_3     | 120               | 9                    | 120,1             |

|            |           |     |    |       |
|------------|-----------|-----|----|-------|
| CIMT       | V211-10_1 | 120 | 14 | 173,9 |
| CIMT       | V211-10_2 | 120 | 6  | 80,9  |
| CIMT       | V211-11_1 | 120 | 1  | 31,3  |
| CIMT       | V211-12_1 | 120 | 0  | 7,4   |
| CIMT       | V211-13_1 | 120 | 2  | 22,1  |
| CIMT       | V211-13_2 | 120 | 3  | 45    |
| CIMT       | V211-15_2 | 120 | 0  | 2,8   |
| CIMT       | V211-16_1 | 120 | 1  | 10,9  |
| CIMT       | V212-14_1 | 120 | 7  | 101,5 |
| CIMT       | V212-14_2 | 120 | 7  | 110   |
| CIMT       | V212-15_1 | 120 | 7  | 102,4 |
| CIMT       | V212-18_1 | 120 | 2  | 31,5  |
| CIMT       | V212-21_1 | 120 | 5  | 81,1  |
| CIMT       | V212-21_2 | 120 | 13 | 166,6 |
| CIMT       | V212-22_1 | 120 | 2  | 37    |
| CIMT       | V212-23_1 | 120 | 2  | 31,7  |
| CIMT       | V212-23_2 | 120 | 22 | 366,7 |
| CIMT       | V212-24_1 | 120 | 1  | 35,5  |
| CIMT       | V218-10_1 | 120 | 2  | 52,4  |
| CIMT       | V218-11_1 | 120 | 9  | 135,3 |
| CIMT       | V218-12_1 | 120 | 3  | 88,5  |
| CIMT       | V218-12_2 | 120 | 2  | 31,3  |
| CIMT       | V218-17_1 | 120 | 1  | 41,9  |
| CIMT       | V299-14_1 | 120 | 1  | 11,5  |
| CIMT       | V299-16_2 | 120 | 2  | 50,1  |
| CIMT       | V299-17_1 | 120 | 5  | 61,4  |
| CIMT       | V299-17_2 | 120 | 1  | 18,1  |
| CIMT       | V300-16_1 | 120 | 5  | 94,8  |
| CIMT       | V300-18_1 | 120 | 0  | 8,2   |
| CIMT       | V300-18_2 | 120 | 6  | 78,8  |
| CIMT       | V300-20_1 | 120 | 3  | 35,5  |
| CIMT       | V300-22_1 | 120 | 6  | 96,2  |
| CIMT       | V300-23_1 | 120 | 0  | 3,9   |
| CIMT       | V309-15_1 | 120 | 1  | 11,1  |
| CIMT       | V309-15_2 | 120 | 2  | 33,1  |
| CIMT       | V309-16_3 | 120 | 2  | 46,6  |
| CIMT       | V309-17_1 | 120 | 0  | 7,6   |
| CIMT       | V309-17_2 | 120 | 9  | 108,7 |
| CIMT+G-CSF | V213-13_1 | 120 | 0  | 63,4  |
| CIMT+G-CSF | V213-17_1 | 120 | 1  | 22    |
| CIMT+G-CSF | V213-17_2 | 120 | 3  | 42,9  |
| CIMT+G-CSF | V213-18_1 | 120 | 2  | 39,5  |
| CIMT+G-CSF | V213-18_2 | 120 | 4  | 42,9  |
| CIMT+G-CSF | V213-19_1 | 120 | 3  | 60,2  |
| CIMT+G-CSF | V213-19_2 | 120 | 0  | 10,3  |
| CIMT+G-CSF | V213-22_1 | 120 | 5  | 55,1  |
| CIMT+G-CSF | V213-23_1 | 120 | 1  | 11,3  |
| CIMT+G-CSF | V214-14_1 | 120 | 1  | 58,6  |
| CIMT+G-CSF | V214-17_1 | 120 | 4  | 66,2  |
| CIMT+G-CSF | V214-18_1 | 120 | 11 | 143,5 |
| CIMT+G-CSF | V214-19_1 | 120 | 1  | 11,6  |
| CIMT+G-CSF | V214-19_2 | 120 | 5  | 58,7  |
| CIMT+G-CSF | V214-20_1 | 120 | 7  | 82,7  |
| CIMT+G-CSF | V214-21_1 | 120 | 3  | 44,8  |
| CIMT+G-CSF | V217-1_1  | 120 | 11 | 154,1 |
| CIMT+G-CSF | V217-2_1  | 120 | 2  | 35,6  |

|            |           |     |    |       |
|------------|-----------|-----|----|-------|
| CIMT+G-CSF | V217-4_1  | 120 | 17 | 234,6 |
| CIMT+G-CSF | V217-6_3  | 120 | 2  | 26,1  |
| CIMT+G-CSF | V217-8_4  | 120 | 3  | 49,8  |
| CIMT+G-CSF | V217-10_1 | 120 | 1  | 11,7  |
| CIMT+G-CSF | V217-11_1 | 120 | 11 | 174,6 |
| CIMT+G-CSF | V304-17_2 | 120 | 2  | 22,2  |
| CIMT+G-CSF | V304-17_3 | 120 | 1  | 29,4  |
| CIMT+G-CSF | V304-17_4 | 120 | 5  | 64,8  |
| CIMT+G-CSF | V304-19_1 | 120 | 1  | 13,7  |
| CIMT+G-CSF | V304-19_2 | 120 | 0  | 14,1  |
| CIMT+G-CSF | V305-18_1 | 120 | 2  | 30,8  |
| CIMT+G-CSF | V305-18_4 | 120 | 1  | 13    |
| CIMT/G-CSF | V306-16_1 | 120 | 0  | 7,3   |
| CIMT/G-CSF | V306-17_1 | 120 | 3  | 44,5  |
| CIMT/G-CSF | V306-17_2 | 120 | 3  | 50,3  |
| CIMT/G-CSF | V306-17_3 | 120 | 1  | 13,3  |
| CIMT/G-CSF | V306-17_4 | 120 | 0  | 6,1   |
| CIMT/G-CSF | V311-16_1 | 120 | 12 | 144,1 |
| CIMT/G-CSF | V311-17_1 | 120 | 2  | 40,8  |
| CIMT/G-CSF | V311-17_2 | 120 | 3  | 31,6  |
| CIMT/G-CSF | V311-19_1 | 120 | 7  | 73,6  |
| CIMT/G-CSF | V311-20_1 | 120 | 8  | 98,9  |
| CIMT/G-CSF | V311-20_2 | 120 | 2  | 56,4  |
| CIMT/G-CSF | V311-20_3 | 120 | 3  | 32,8  |
| CIMT/G-CSF | V313-14_1 | 120 | 5  | 63,8  |
| CIMT/G-CSF | V313-17_1 | 120 | 6  | 79    |
| CIMT/G-CSF | V313-17_2 | 120 | 0  | 2,6   |
| CIMT/G-CSF | V314-16_2 | 120 | 3  | 41,3  |
| CIMT/G-CSF | V314-17_1 | 120 | 1  | 10,1  |
| CIMT/G-CSF | V314-18_1 | 120 | 1  | 10,4  |
| CIMT/G-CSF | V314-18_2 | 120 | 3  | 43,9  |
| CIMT/G-CSF | V315-11_1 | 120 | 3  | 43,7  |
| CIMT/G-CSF | V315-13_1 | 120 | 1  | 13,8  |
| CIMT/G-CSF | V315-13_2 | 120 | 6  | 85    |
| CIMT/G-CSF | V315-14_1 | 120 | 3  | 61,6  |
| CIMT/G-CSF | V315-14_2 | 120 | 2  | 25,5  |
| CIMT/G-CSF | V315-14_3 | 120 | 10 | 154,3 |
| G-CSF      | V220-9_1  | 120 | 4  | 79,5  |
| G-CSF      | V220-12_1 | 120 | 1  | 10,3  |
| G-CSF      | V220-16_1 | 120 | 4  | 71,6  |
| G-CSF      | V220-16_2 | 120 | 1  | 33,8  |
| G-CSF      | V220-17_1 | 120 | 6  | 68,1  |
| G-CSF      | V220-18_1 | 120 | 1  | 22    |
| G-CSF      | V221-2_1  | 120 | 3  | 39,6  |
| G-CSF      | V221-6_1  | 120 | 1  | 12,9  |
| G-CSF      | V221-7_1  | 120 | 2  | 20,3  |
| G-CSF      | V221-7_2  | 120 | 4  | 46    |
| G-CSF      | V221-13_1 | 120 | 9  | 128,4 |
| G-CSF      | V221-15_1 | 120 | 1  | 10,2  |
| G-CSF      | V221-20_1 | 120 | 2  | 20,7  |
| G-CSF      | V222-19_1 | 120 | 10 | 126,1 |
| G-CSF      | V222-20_1 | 120 | 6  | 95,6  |
| G-CSF      | V222-20_2 | 120 | 5  | 60,6  |
| G-CSF      | V222-21_1 | 120 | 7  | 91,2  |
| G-CSF      | V222-22_1 | 120 | 2  | 32    |
| G-CSF      | V222-22_2 | 120 | 5  | 62,4  |



|       |           |     |    |       |
|-------|-----------|-----|----|-------|
| G-CSF | V222-23_1 | 120 | 12 | 159,5 |
| G-CSF | V222-24_1 | 120 | 6  | 76,3  |
| G-CSF | V301-18_2 | 120 | 3  | 34,8  |
| G-CSF | V301-19_1 | 120 | 0  | 9,1   |
| G-CSF | V301-20_2 | 120 | 1  | 20,5  |
| G-CSF | V302-15_2 | 120 | 1  | 10,5  |
| G-CSF | V302-15_3 | 120 | 1  | 31,8  |
| G-CSF | V302-16_1 | 120 | 1  | 10,1  |
| G-CSF | V302-16_4 | 120 | 1  | 10,7  |
| G-CSF | V302-17_1 | 120 | 5  | 72,7  |
| G-CSF | V303-15_2 | 120 | 1  | 12,2  |
| G-CSF | V303-15_3 | 120 | 3  | 34,4  |
| G-CSF | V303-16_1 | 120 | 8  | 117   |
| G-CSF | V303-16_2 | 120 | 4  | 47,2  |
| G-CSF | V303-16_3 | 120 | 1  | 14,2  |
| G-CSF | V303-17_1 | 120 | 10 | 116   |

**basilar dendrite Sholl 130 $\mu$ m**

| <b>Group</b> | <b>number</b> | <b>Radius(<math>\mu</math>m)</b> | <b>Intersections</b> | <b>Length(<math>\mu</math>m)</b> |
|--------------|---------------|----------------------------------|----------------------|----------------------------------|
| Control      | V215-10_2     | 130                              | 5                    | 62,8                             |
| Control      | V215-12_1     | 130                              | 2                    | 37,4                             |
| Control      | V215-12_2     | 130                              | 1                    | 30,2                             |
| Control      | V215-15_2     | 130                              | 0                    | 25,8                             |
| Control      | V215-16_1     | 130                              | 1                    | 18,9                             |
| Control      | V216-16_2     | 130                              | 3                    | 35,7                             |
| Control      | V216-17_1     | 130                              | 1                    | 11,2                             |
| Control      | V216-18_2     | 130                              | 2                    | 21,8                             |
| Control      | V219-6_1      | 130                              | 9                    | 162,8                            |
| Control      | V219-11_1     | 130                              | 4                    | 48,5                             |
| Control      | V219-12_1     | 130                              | 4                    | 44,6                             |
| Control      | V219-14_2     | 130                              | 2                    | 31,4                             |
| Control      | V219-16_1     | 130                              | 1                    | 12,5                             |
| Control      | V297-19_1     | 130                              | 2                    | 32,2                             |
| Control      | V297-20_3     | 130                              | 4                    | 45                               |
| Control      | V297-22_1     | 130                              | 10                   | 116,7                            |
| Control      | V298-15_1     | 130                              | 9                    | 97                               |
| Control      | V298-16_2     | 130                              | 1                    | 12                               |
| Control      | V298-17_2     | 130                              | 5                    | 68,3                             |
| Control      | V298-17_3     | 130                              | 7                    | 84,4                             |
| Control      | V308-17_1     | 130                              | 0                    | 2,5                              |
| Control      | V308-17_2     | 130                              | 5                    | 75                               |
| Control      | V308-17_3     | 130                              | 2                    | 38,1                             |
| Control      | V308-18_2     | 130                              | 0                    | 3                                |
| Control      | V308-18_3     | 130                              | 6                    | 172,9                            |
| CIMT         | V211-10_1     | 130                              | 12                   | 148                              |
| CIMT         | V211-10_2     | 130                              | 6                    | 67,9                             |
| CIMT         | V211-11_1     | 130                              | 1                    | 10,4                             |
| CIMT         | V211-13_1     | 130                              | 3                    | 25,2                             |
| CIMT         | V211-13_2     | 130                              | 2                    | 36,8                             |
| CIMT         | V211-16_1     | 130                              | 1                    | 12,6                             |
| CIMT         | V212-14_1     | 130                              | 7                    | 99,8                             |
| CIMT         | V212-14_2     | 130                              | 5                    | 74                               |
| CIMT         | V212-15_1     | 130                              | 7                    | 88,2                             |
| CIMT         | V212-18_1     | 130                              | 2                    | 24                               |

|            |           |     |    |       |
|------------|-----------|-----|----|-------|
| CIMT       | V212-21_1 | 130 | 7  | 64,9  |
| CIMT       | V212-21_2 | 130 | 13 | 148,9 |
| CIMT       | V212-22_1 | 130 | 0  | 5,4   |
| CIMT       | V212-23_1 | 130 | 2  | 33,1  |
| CIMT       | V212-23_2 | 130 | 19 | 296,8 |
| CIMT       | V212-24_1 | 130 | 1  | 12,2  |
| CIMT       | V218-10_1 | 130 | 2  | 26,9  |
| CIMT       | V218-11_1 | 130 | 9  | 120,4 |
| CIMT       | V218-12_1 | 130 | 2  | 34,4  |
| CIMT       | V218-12_2 | 130 | 2  | 21,9  |
| CIMT       | V218-17_1 | 130 | 0  | 0,8   |
| CIMT       | V299-14_1 | 130 | 0  | 0,7   |
| CIMT       | V299-16_2 | 130 | 2  | 23,1  |
| CIMT       | V299-17_1 | 130 | 2  | 63,9  |
| CIMT       | V299-17_2 | 130 | 1  | 10,5  |
| CIMT       | V300-16_1 | 130 | 5  | 80,4  |
| CIMT       | V300-18_2 | 130 | 4  | 67,6  |
| CIMT       | V300-20_1 | 130 | 3  | 36,2  |
| CIMT       | V300-22_1 | 130 | 3  | 51,1  |
| CIMT       | V309-15_1 | 130 | 1  | 10,9  |
| CIMT       | V309-15_2 | 130 | 0  | 10,2  |
| CIMT       | V309-16_3 | 130 | 0  | 5,1   |
| CIMT       | V309-17_2 | 130 | 10 | 111,9 |
| CIMT+G-CSF | V213-17_1 | 130 | 1  | 11,9  |
| CIMT+G-CSF | V213-17_2 | 130 | 2  | 28,1  |
| CIMT+G-CSF | V213-18_1 | 130 | 2  | 23,7  |
| CIMT+G-CSF | V213-18_2 | 130 | 4  | 50,2  |
| CIMT+G-CSF | V213-19_1 | 130 | 2  | 34,2  |
| CIMT+G-CSF | V213-22_1 | 130 | 3  | 53,5  |
| CIMT+G-CSF | V213-23_1 | 130 | 1  | 11,7  |
| CIMT+G-CSF | V214-14_1 | 130 | 0  | 5,5   |
| CIMT+G-CSF | V214-17_1 | 130 | 2  | 54,6  |
| CIMT+G-CSF | V214-18_1 | 130 | 11 | 120,9 |
| CIMT+G-CSF | V214-19_1 | 130 | 1  | 11,1  |
| CIMT+G-CSF | V214-19_2 | 130 | 4  | 58,2  |
| CIMT+G-CSF | V214-20_1 | 130 | 6  | 67,9  |
| CIMT+G-CSF | V214-21_1 | 130 | 3  | 35,4  |
| CIMT+G-CSF | V217-1_1  | 130 | 8  | 131   |
| CIMT+G-CSF | V217-2_1  | 130 | 1  | 20,6  |
| CIMT+G-CSF | V217-4_1  | 130 | 15 | 174,6 |
| CIMT+G-CSF | V217-6_3  | 130 | 1  | 18,1  |
| CIMT+G-CSF | V217-8_4  | 130 | 3  | 35,6  |
| CIMT+G-CSF | V217-10_1 | 130 | 1  | 12,1  |
| CIMT+G-CSF | V217-11_1 | 130 | 9  | 126,1 |
| CIMT+G-CSF | V304-17_2 | 130 | 0  | 9,8   |
| CIMT+G-CSF | V304-17_3 | 130 | 1  | 11    |
| CIMT+G-CSF | V304-17_4 | 130 | 1  | 41,7  |
| CIMT+G-CSF | V304-19_1 | 130 | 1  | 14,1  |
| CIMT+G-CSF | V305-18_1 | 130 | 1  | 15,5  |
| CIMT+G-CSF | V305-18_4 | 130 | 1  | 12,7  |
| CIMT/G-CSF | V306-17_1 | 130 | 4  | 58    |
| CIMT/G-CSF | V306-17_2 | 130 | 2  | 52,1  |
| CIMT/G-CSF | V306-17_3 | 130 | 1  | 10,7  |
| CIMT/G-CSF | V311-16_1 | 130 | 7  | 110,6 |
| CIMT/G-CSF | V311-17_1 | 130 | 1  | 22,4  |
| CIMT/G-CSF | V311-17_2 | 130 | 2  | 28,1  |

|            |           |     |    |       |
|------------|-----------|-----|----|-------|
| CIMT/G-CSF | V311-19_1 | 130 | 2  | 85,3  |
| CIMT/G-CSF | V311-20_1 | 130 | 9  | 103,1 |
| CIMT/G-CSF | V311-20_2 | 130 | 2  | 24,7  |
| CIMT/G-CSF | V311-20_3 | 130 | 2  | 23,7  |
| CIMT/G-CSF | V313-14_1 | 130 | 5  | 71,6  |
| CIMT/G-CSF | V313-17_1 | 130 | 5  | 61,2  |
| CIMT/G-CSF | V314-16_2 | 130 | 2  | 30,4  |
| CIMT/G-CSF | V314-17_1 | 130 | 1  | 10,1  |
| CIMT/G-CSF | V314-18_1 | 130 | 0  | 0,8   |
| CIMT/G-CSF | V314-18_2 | 130 | 1  | 23,1  |
| CIMT/G-CSF | V315-11_1 | 130 | 0  | 12,2  |
| CIMT/G-CSF | V315-13_1 | 130 | 2  | 16,3  |
| CIMT/G-CSF | V315-13_2 | 130 | 2  | 45    |
| CIMT/G-CSF | V315-14_1 | 130 | 2  | 37,4  |
| CIMT/G-CSF | V315-14_2 | 130 | 1  | 20,2  |
| CIMT/G-CSF | V315-14_3 | 130 | 6  | 118,3 |
| G-CSF      | V220-9_1  | 130 | 3  | 43,7  |
| G-CSF      | V220-12_1 | 130 | 1  | 11,8  |
| G-CSF      | V220-16_1 | 130 | 3  | 67,4  |
| G-CSF      | V220-16_2 | 130 | 1  | 12,9  |
| G-CSF      | V220-17_1 | 130 | 2  | 64,2  |
| G-CSF      | V220-18_1 | 130 | 1  | 12    |
| G-CSF      | V221-2_1  | 130 | 0  | 15,2  |
| G-CSF      | V221-6_1  | 130 | 0  | 0,4   |
| G-CSF      | V221-7_1  | 130 | 2  | 21,8  |
| G-CSF      | V221-7_2  | 130 | 3  | 32,8  |
| G-CSF      | V221-13_1 | 130 | 7  | 81,3  |
| G-CSF      | V221-15_1 | 130 | 1  | 10,3  |
| G-CSF      | V221-20_1 | 130 | 2  | 21,1  |
| G-CSF      | V222-19_1 | 130 | 9  | 176,7 |
| G-CSF      | V222-20_1 | 130 | 4  | 91,7  |
| G-CSF      | V222-20_2 | 130 | 3  | 45,3  |
| G-CSF      | V222-21_1 | 130 | 7  | 98,7  |
| G-CSF      | V222-22_1 | 130 | 2  | 41,9  |
| G-CSF      | V222-22_2 | 130 | 3  | 41,8  |
| G-CSF      | V222-23_1 | 130 | 11 | 163,3 |
| G-CSF      | V222-24_1 | 130 | 6  | 66,9  |
| G-CSF      | V301-18_2 | 130 | 2  | 31,1  |
| G-CSF      | V301-20_2 | 130 | 1  | 12    |
| G-CSF      | V302-15_2 | 130 | 1  | 11    |
| G-CSF      | V302-15_3 | 130 | 0  | 6,9   |
| G-CSF      | V302-16_1 | 130 | 0  | 7     |
| G-CSF      | V302-16_4 | 130 | 1  | 10,5  |
| G-CSF      | V302-17_1 | 130 | 4  | 58,3  |
| G-CSF      | V303-15_2 | 130 | 0  | 7,5   |
| G-CSF      | V303-15_3 | 130 | 3  | 33,8  |
| G-CSF      | V303-16_1 | 130 | 5  | 89,2  |
| G-CSF      | V303-16_2 | 130 | 3  | 36,9  |
| G-CSF      | V303-16_3 | 130 | 0  | 2     |
| G-CSF      | V303-17_1 | 130 | 10 | 134,9 |

**basilar dendrite Sholl 140 $\mu$ m**

| <b>Group</b> | <b>number</b> | <b>Radius(<math>\mu</math>m)</b> | <b>Intersections</b> | <b>Length(<math>\mu</math>m)</b> |
|--------------|---------------|----------------------------------|----------------------|----------------------------------|
| Control      | V215-10_2     | 140                              | 5                    | 67,6                             |
| Control      | V215-12_1     | 140                              | 1                    | 21                               |
| Control      | V215-12_2     | 140                              | 0                    | 21,3                             |
| Control      | V215-16_1     | 140                              | 0                    | 9,7                              |
| Control      | V216-16_2     | 140                              | 2                    | 24,5                             |
| Control      | V216-17_1     | 140                              | 0                    | 8,2                              |
| Control      | V216-18_2     | 140                              | 2                    | 24                               |
| Control      | V219-6_1      | 140                              | 9                    | 124,5                            |
| Control      | V219-11_1     | 140                              | 3                    | 66,2                             |
| Control      | V219-12_1     | 140                              | 2                    | 37,5                             |
| Control      | V219-14_2     | 140                              | 1                    | 17,4                             |
| Control      | V219-16_1     | 140                              | 1                    | 10,7                             |
| Control      | V297-19_1     | 140                              | 1                    | 17,3                             |
| Control      | V297-20_3     | 140                              | 3                    | 44,6                             |
| Control      | V297-22_1     | 140                              | 9                    | 142                              |
| Control      | V298-15_1     | 140                              | 8                    | 110,8                            |
| Control      | V298-16_2     | 140                              | 0                    | 11,9                             |
| Control      | V298-17_2     | 140                              | 4                    | 67,8                             |
| Control      | V298-17_3     | 140                              | 5                    | 68,3                             |
| Control      | V308-17_2     | 140                              | 2                    | 44,7                             |
| Control      | V308-17_3     | 140                              | 1                    | 12,3                             |
| Control      | V308-18_3     | 140                              | 6                    | 76,1                             |
| CIMT         | V211-10_1     | 140                              | 13                   | 176,3                            |
| CIMT         | V211-10_2     | 140                              | 5                    | 75,3                             |
| CIMT         | V211-11_1     | 140                              | 0                    | 9,1                              |
| CIMT         | V211-13_1     | 140                              | 2                    | 29,1                             |
| CIMT         | V211-13_2     | 140                              | 0                    | 35                               |
| CIMT         | V211-16_1     | 140                              | 1                    | 10,8                             |
| CIMT         | V212-14_1     | 140                              | 6                    | 78,6                             |
| CIMT         | V212-14_2     | 140                              | 10                   | 91,5                             |
| CIMT         | V212-15_1     | 140                              | 6                    | 82,4                             |
| CIMT         | V212-18_1     | 140                              | 2                    | 26,7                             |
| CIMT         | V212-21_1     | 140                              | 3                    | 98,9                             |
| CIMT         | V212-21_2     | 140                              | 9                    | 178,1                            |
| CIMT         | V212-23_1     | 140                              | 1                    | 12,2                             |
| CIMT         | V212-23_2     | 140                              | 19                   | 248,1                            |
| CIMT         | V212-24_1     | 140                              | 0                    | 9,9                              |
| CIMT         | V218-10_1     | 140                              | 1                    | 18,3                             |
| CIMT         | V218-11_1     | 140                              | 8                    | 98,1                             |
| CIMT         | V218-12_1     | 140                              | 2                    | 33,3                             |
| CIMT         | V218-12_2     | 140                              | 2                    | 22,9                             |
| CIMT         | V299-16_2     | 140                              | 2                    | 21,5                             |
| CIMT         | V299-17_1     | 140                              | 1                    | 20                               |
| CIMT         | V299-17_2     | 140                              | 1                    | 10,3                             |
| CIMT         | V300-16_1     | 140                              | 4                    | 49,3                             |
| CIMT         | V300-18_2     | 140                              | 3                    | 41,5                             |
| CIMT         | V300-20_1     | 140                              | 2                    | 29,5                             |
| CIMT         | V300-22_1     | 140                              | 2                    | 24,6                             |
| CIMT         | V309-15_1     | 140                              | 1                    | 11                               |
| CIMT         | V309-17_2     | 140                              | 8                    | 116,3                            |
| CIMT+G-CSF   | V213-17_1     | 140                              | 1                    | 10,2                             |
| CIMT+G-CSF   | V213-17_2     | 140                              | 2                    | 21,2                             |
| CIMT+G-CSF   | V213-18_1     | 140                              | 2                    | 23,8                             |

|            |           |     |    |       |
|------------|-----------|-----|----|-------|
| CIMT+G-CSF | V213-18_2 | 140 | 1  | 35,9  |
| CIMT+G-CSF | V213-19_1 | 140 | 1  | 16,2  |
| CIMT+G-CSF | V213-22_1 | 140 | 3  | 43,6  |
| CIMT+G-CSF | V213-23_1 | 140 | 1  | 10,4  |
| CIMT+G-CSF | V214-17_1 | 140 | 2  | 23,1  |
| CIMT+G-CSF | V214-18_1 | 140 | 10 | 119   |
| CIMT+G-CSF | V214-19_1 | 140 | 0  | 0     |
| CIMT+G-CSF | V214-19_2 | 140 | 3  | 40,1  |
| CIMT+G-CSF | V214-20_1 | 140 | 5  | 56,7  |
| CIMT+G-CSF | V214-21_1 | 140 | 3  | 33,5  |
| CIMT+G-CSF | V217-1_1  | 140 | 6  | 81,1  |
| CIMT+G-CSF | V217-2_1  | 140 | 0  | 7,7   |
| CIMT+G-CSF | V217-4_1  | 140 | 14 | 164,6 |
| CIMT+G-CSF | V217-6_3  | 140 | 1  | 13,5  |
| CIMT+G-CSF | V217-8_4  | 140 | 2  | 43,4  |
| CIMT+G-CSF | V217-10_1 | 140 | 0  | 9,1   |
| CIMT+G-CSF | V217-11_1 | 140 | 8  | 159,8 |
| CIMT+G-CSF | V304-17_3 | 140 | 1  | 12,4  |
| CIMT+G-CSF | V304-17_4 | 140 | 0  | 6,6   |
| CIMT+G-CSF | V304-19_1 | 140 | 1  | 11,3  |
| CIMT+G-CSF | V305-18_1 | 140 | 1  | 11,1  |
| CIMT+G-CSF | V305-18_4 | 140 | 0  | 8,4   |
| CIMT/G-CSF | V306-17_1 | 140 | 3  | 54,4  |
| CIMT/G-CSF | V306-17_2 | 140 | 1  | 31,5  |
| CIMT/G-CSF | V306-17_3 | 140 | 1  | 10,4  |
| CIMT/G-CSF | V311-16_1 | 140 | 6  | 89,7  |
| CIMT/G-CSF | V311-17_1 | 140 | 1  | 12,8  |
| CIMT/G-CSF | V311-17_2 | 140 | 1  | 15    |
| CIMT/G-CSF | V311-19_1 | 140 | 1  | 29,3  |
| CIMT/G-CSF | V311-20_1 | 140 | 7  | 123   |
| CIMT/G-CSF | V311-20_2 | 140 | 1  | 23,4  |
| CIMT/G-CSF | V311-20_3 | 140 | 2  | 22,7  |
| CIMT/G-CSF | V313-14_1 | 140 | 4  | 67,6  |
| CIMT/G-CSF | V313-17_1 | 140 | 3  | 52,3  |
| CIMT/G-CSF | V314-16_2 | 140 | 1  | 18,7  |
| CIMT/G-CSF | V314-17_1 | 140 | 1  | 10,1  |
| CIMT/G-CSF | V314-18_2 | 140 | 0  | 1,7   |
| CIMT/G-CSF | V315-13_1 | 140 | 2  | 26,6  |
| CIMT/G-CSF | V315-13_2 | 140 | 2  | 22,1  |
| CIMT/G-CSF | V315-14_1 | 140 | 0  | 16,6  |
| CIMT/G-CSF | V315-14_2 | 140 | 1  | 11    |
| CIMT/G-CSF | V315-14_3 | 140 | 6  | 71,8  |
| G-CSF      | V220-9_1  | 140 | 2  | 42,2  |
| G-CSF      | V220-12_1 | 140 | 1  | 16,4  |
| G-CSF      | V220-16_1 | 140 | 4  | 71,2  |
| G-CSF      | V220-16_2 | 140 | 1  | 11,5  |
| G-CSF      | V220-17_1 | 140 | 2  | 26    |
| G-CSF      | V220-18_1 | 140 | 0  | 2,6   |
| G-CSF      | V221-7_1  | 140 | 2  | 23,7  |
| G-CSF      | V221-7_2  | 140 | 2  | 32,3  |
| G-CSF      | V221-13_1 | 140 | 5  | 61,1  |
| G-CSF      | V221-15_1 | 140 | 1  | 10    |
| G-CSF      | V221-20_1 | 140 | 2  | 35,2  |
| G-CSF      | V222-19_1 | 140 | 7  | 97,1  |
| G-CSF      | V222-20_1 | 140 | 3  | 45,8  |
| G-CSF      | V222-20_2 | 140 | 0  | 11,3  |

|       |           |     |   |       |
|-------|-----------|-----|---|-------|
| G-CSF | V222-21_1 | 140 | 4 | 81,6  |
| G-CSF | V222-22_1 | 140 | 0 | 10    |
| G-CSF | V222-22_2 | 140 | 1 | 13,8  |
| G-CSF | V222-23_1 | 140 | 7 | 141,7 |
| G-CSF | V222-24_1 | 140 | 2 | 39,7  |
| G-CSF | V301-18_2 | 140 | 2 | 28,6  |
| G-CSF | V301-20_2 | 140 | 0 | 2,5   |
| G-CSF | V302-15_2 | 140 | 1 | 10,7  |
| G-CSF | V302-16_4 | 140 | 1 | 10,5  |
| G-CSF | V302-17_1 | 140 | 3 | 36,9  |
| G-CSF | V303-15_3 | 140 | 3 | 40,1  |
| G-CSF | V303-16_1 | 140 | 4 | 54,8  |
| G-CSF | V303-16_2 | 140 | 3 | 31,8  |
| G-CSF | V303-17_1 | 140 | 5 | 82,8  |

**basilar dendrite Sholl 150 $\mu$ m**

| <b>Group</b> | <b>number</b> | <b>Radius(<math>\mu</math>m)</b> | <b>Intersections</b> | <b>Length(<math>\mu</math>m)</b> |
|--------------|---------------|----------------------------------|----------------------|----------------------------------|
| Control      | V215-10_2     | 150                              | 6                    | 82,1                             |
| Control      | V215-12_1     | 150                              | 1                    | 10,4                             |
| Control      | V216-16_2     | 150                              | 2                    | 31,3                             |
| Control      | V216-18_2     | 150                              | 1                    | 17,2                             |
| Control      | V219-6_1      | 150                              | 8                    | 120,5                            |
| Control      | V219-11_1     | 150                              | 3                    | 39,1                             |
| Control      | V219-12_1     | 150                              | 2                    | 28,2                             |
| Control      | V219-14_2     | 150                              | 0                    | 1,1                              |
| Control      | V219-16_1     | 150                              | 1                    | 11,1                             |
| Control      | V297-19_1     | 150                              | 0                    | 5,4                              |
| Control      | V297-20_3     | 150                              | 3                    | 43,3                             |
| Control      | V297-22_1     | 150                              | 2                    | 75,1                             |
| Control      | V298-15_1     | 150                              | 7                    | 82,8                             |
| Control      | V298-17_2     | 150                              | 3                    | 42,6                             |
| Control      | V298-17_3     | 150                              | 5                    | 55,1                             |
| Control      | V308-17_2     | 150                              | 1                    | 19,8                             |
| Control      | V308-17_3     | 150                              | 0                    | 10,1                             |
| Control      | V308-18_3     | 150                              | 5                    | 78,5                             |
| CIMT         | V211-10_1     | 150                              | 12                   | 155,3                            |
| CIMT         | V211-10_2     | 150                              | 7                    | 63,5                             |
| CIMT         | V211-13_1     | 150                              | 1                    | 14,4                             |
| CIMT         | V211-16_1     | 150                              | 1                    | 10,4                             |
| CIMT         | V212-14_1     | 150                              | 4                    | 62,7                             |
| CIMT         | V212-14_2     | 150                              | 9                    | 221,2                            |
| CIMT         | V212-15_1     | 150                              | 3                    | 67,1                             |
| CIMT         | V212-18_1     | 150                              | 1                    | 15,8                             |
| CIMT         | V212-21_1     | 150                              | 2                    | 30                               |
| CIMT         | V212-21_2     | 150                              | 8                    | 95,7                             |
| CIMT         | V212-23_1     | 150                              | 1                    | 13,6                             |
| CIMT         | V212-23_2     | 150                              | 12                   | 254                              |
| CIMT         | V218-10_1     | 150                              | 0                    | 3,6                              |
| CIMT         | V218-11_1     | 150                              | 5                    | 79,4                             |
| CIMT         | V218-12_1     | 150                              | 0                    | 13,4                             |
| CIMT         | V218-12_2     | 150                              | 1                    | 21,5                             |
| CIMT         | V299-16_2     | 150                              | 1                    | 14                               |
| CIMT         | V299-17_1     | 150                              | 1                    | 13                               |
| CIMT         | V299-17_2     | 150                              | 1                    | 11,2                             |

|            |           |     |    |       |
|------------|-----------|-----|----|-------|
| CIMT       | V300-16_1 | 150 | 5  | 60,6  |
| CIMT       | V300-18_2 | 150 | 2  | 32,6  |
| CIMT       | V300-20_1 | 150 | 1  | 12,9  |
| CIMT       | V300-22_1 | 150 | 2  | 24,6  |
| CIMT       | V309-15_1 | 150 | 0  | 11,9  |
| CIMT       | V309-17_2 | 150 | 7  | 93,9  |
| CIMT+G-CSF | V213-17_1 | 150 | 0  | 7,3   |
| CIMT+G-CSF | V213-17_2 | 150 | 2  | 22,2  |
| CIMT+G-CSF | V213-18_1 | 150 | 1  | 44,3  |
| CIMT+G-CSF | V213-18_2 | 150 | 1  | 10,5  |
| CIMT+G-CSF | V213-19_1 | 150 | 1  | 16,3  |
| CIMT+G-CSF | V213-22_1 | 150 | 2  | 29,5  |
| CIMT+G-CSF | V213-23_1 | 150 | 1  | 10,3  |
| CIMT+G-CSF | V214-17_1 | 150 | 2  | 23,8  |
| CIMT+G-CSF | V214-18_1 | 150 | 10 | 116,3 |
| CIMT+G-CSF | V214-19_2 | 150 | 2  | 29,6  |
| CIMT+G-CSF | V214-20_1 | 150 | 2  | 38,7  |
| CIMT+G-CSF | V214-21_1 | 150 | 2  | 27,5  |
| CIMT+G-CSF | V217-1_1  | 150 | 6  | 129,1 |
| CIMT+G-CSF | V217-4_1  | 150 | 12 | 157,9 |
| CIMT+G-CSF | V217-6_3  | 150 | 1  | 14    |
| CIMT+G-CSF | V217-8_4  | 150 | 2  | 23,2  |
| CIMT+G-CSF | V217-11_1 | 150 | 7  | 93,7  |
| CIMT+G-CSF | V304-17_3 | 150 | 1  | 10,1  |
| CIMT+G-CSF | V304-19_1 | 150 | 0  | 1,5   |
| CIMT+G-CSF | V305-18_1 | 150 | 1  | 11,6  |
| CIMT/G-CSF | V306-17_1 | 150 | 2  | 27,2  |
| CIMT/G-CSF | V306-17_2 | 150 | 1  | 16,7  |
| CIMT/G-CSF | V306-17_3 | 150 | 1  | 13,9  |
| CIMT/G-CSF | V311-16_1 | 150 | 6  | 68,1  |
| CIMT/G-CSF | V311-17_1 | 150 | 1  | 10,3  |
| CIMT/G-CSF | V311-17_2 | 150 | 1  | 10,3  |
| CIMT/G-CSF | V311-19_1 | 150 | 0  | 2,6   |
| CIMT/G-CSF | V311-20_1 | 150 | 7  | 79    |
| CIMT/G-CSF | V311-20_2 | 150 | 0  | 6,7   |
| CIMT/G-CSF | V311-20_3 | 150 | 1  | 22,6  |
| CIMT/G-CSF | V313-14_1 | 150 | 4  | 54,4  |
| CIMT/G-CSF | V313-17_1 | 150 | 2  | 30,5  |
| CIMT/G-CSF | V314-16_2 | 150 | 0  | 2,3   |
| CIMT/G-CSF | V314-17_1 | 150 | 1  | 10,2  |
| CIMT/G-CSF | V315-13_1 | 150 | 0  | 12,1  |
| CIMT/G-CSF | V315-13_2 | 150 | 1  | 16,6  |
| CIMT/G-CSF | V315-14_2 | 150 | 1  | 14,6  |
| CIMT/G-CSF | V315-14_3 | 150 | 4  | 57    |
| G-CSF      | V220-9_1  | 150 | 2  | 22,9  |
| G-CSF      | V220-12_1 | 150 | 0  | 0     |
| G-CSF      | V220-16_1 | 150 | 3  | 104,8 |
| G-CSF      | V220-16_2 | 150 | 1  | 10,1  |
| G-CSF      | V220-17_1 | 150 | 2  | 24,4  |
| G-CSF      | V221-7_1  | 150 | 2  | 30,2  |
| G-CSF      | V221-7_2  | 150 | 1  | 17,3  |
| G-CSF      | V221-13_1 | 150 | 5  | 54,9  |
| G-CSF      | V221-15_1 | 150 | 1  | 10,1  |
| G-CSF      | V221-20_1 | 150 | 2  | 20,8  |
| G-CSF      | V222-19_1 | 150 | 4  | 58,1  |
| G-CSF      | V222-20_1 | 150 | 2  | 25    |

|       |           |     |   |      |
|-------|-----------|-----|---|------|
| G-CSF | V222-21_1 | 150 | 3 | 35,4 |
| G-CSF | V222-22_2 | 150 | 1 | 29,3 |
| G-CSF | V222-23_1 | 150 | 4 | 71,8 |
| G-CSF | V222-24_1 | 150 | 1 | 14   |
| G-CSF | V301-18_2 | 150 | 1 | 12,4 |
| G-CSF | V302-15_2 | 150 | 1 | 13,7 |
| G-CSF | V302-16_4 | 150 | 1 | 10,8 |
| G-CSF | V302-17_1 | 150 | 2 | 29,4 |
| G-CSF | V303-15_3 | 150 | 3 | 35,9 |
| G-CSF | V303-16_1 | 150 | 4 | 47,8 |
| G-CSF | V303-16_2 | 150 | 2 | 30,9 |
| G-CSF | V303-17_1 | 150 | 4 | 54,3 |
